# Supplementary material for: Photoprotective Acclimation of the Arabidopsis thaliana Leaf Proteome to Fluctuating Light
Source: Front Genet. 2020 Mar 5;11:154. doi: 10.3389/fgene.2020.00154 (PMC7066320; doi:10.3389/fgene.2020.00154)
Supplement: Supplementary file 1 [file DataSheet_1.xlsx]

## Sheet: index
Supplementary data for Photoprotective acclimation of the Arabidopsis thaliana leaf proteome to fluctuating light Stefan Niedermaier, Trang Schneider, Marc-Oliver Bahl, Shizue Matsubara, Pitter F. Huesgen
Supplementary table	Description
Supplementary Table 1	Entire set of proteins identified in database search.
Supplementary Table 2	GO terms and KEGG pathways enriched in proteins with significant increase in three or four out of MY, MM, EY and EM.
Supplementary Table 3	GO terms enriched in proteins with significant decrease in three or four out of MY, MM, EY and EM.
Supplementary Table 4	GO terms and KEGG pathways enriched in proteins with significant increase in both EY and EM.
Supplementary Table 5	Changes in protein abundance under FL in selected pathways. Significant values are indicated in bold.
Supplementary Table 6	Proteins and genes with concomitant significant increase in protein and transcript abundance under FL.
Supplementary Table 7	Proteins and genes with concomitant significant increase in protein and transcript abundance under FL.
Supplementary Table 8	GO terms and KEGG pathways enriched in proteins with concomitant increase in protein and transcript abundance under FL.
Supplementary Table 9	Proteins with concomitant significant decrease in protein and transcript abundance under FL.

## Sheet: Suppl Table 1
Supplementary Table 1: Entire set of proteins identified in database search. Log2 fold change reflects the avarage of the five biological replicates for each experiment. Adjusted p-values were calculated based on LIMMA moderated t-test. A protein was considered significantly changed under FL if the Benjamini-Hochberg adusted p-value was ≤ 0.05 in the respective experiment.
AGI locus	Majority protein IDs	Gene names	UniProt protein names (Majority Protein ID)	log2FC [MY]	log2FC [MM]	log2FC [EY]	log2FC [EM]	adj.P.Val [MY]	adj.P.Val [MM]	adj.P.Val [EY]	adj.P.Val [EM]	Peptides	Razor + unique peptides	Unique peptides	Sequence coverage [%]	Unique + razor sequence coverage [%]	Unique sequence coverage [%]	Mol. weight [kDa]	Score	Intensity	Intensity L	Intensity H	EM R1	EM R2	EM R3	EM R4	EM R5	EY R1	EY R2	EY R3	EY R4	EY R5	MM R1	MM R2	MM R3	MM R4	MM R5	MY R1	MY R2	MY R3	MY R4	MY R5
AT4G24770	Q04836-2;Q04836	CP31A	31 kDa ribonucleoprotein, chloroplastic (RNA-binding protein 1/2/3) (AtRBP33) (RNA-binding protein CP31A) (RNA-binding protein RNP-T) (RNA-binding protein cp31)	0.224417	0.247064	0.24631	0.245282	0.0411383	0.049914	0.0337782	0.0127538	8	8	2	42.2	42.2	14.3	34.4	323.31	1075200000	549130000	526060000	0.139638	0.385267	0.243259	0.283224	0.175022	0.17176	0.487257	0.131554	0.146611	0.294367	0.296588	0.26771	0.245288	0.257191	0.168545	0.227965	0.205778	0.162892	0.253616	0.271834
AT2G30870	P42761	GSTF10	Glutathione S-transferase F10 (AtGSTF10) (EC 2.5.1.18) (AtGSTF4) (GST class-phi member 10) (Protein EARLY RESPONSE TO DEHYDRATION 13)	-0.350037	-0.364069	-0.410185	-0.365016	0.0364175	0.0474514	0.00840641	0.0142027	9	9	8	54	54	49.8	24.23	255.86	280860000	166940000	113920000	-0.438811	-0.4017	-0.512291	-0.0445566	-0.427722	-0.131343	-0.492917	-0.462422	-0.442282	-0.521963	-0.498302	-0.427967	-0.232434	-0.296427	-0.365214	-0.172209	-0.372293	-0.467326	-0.492355	-0.246002
AT1G78370	Q8L7C9	GSTU20	Glutathione S-transferase U20 (AtGSTU20) (EC 2.5.1.18) (FIN219-interacting protein 1) (GST class-tau member 20)	-0.273159	-0.420581	-0.628597	-0.51117	0.0411383	0.049914	0.00305176	0.0027084	11	10	9	54.4	51.2	51.2	25.006	100.81	180710000	107710000	73000000	-0.591227	-0.389449	-0.394386	-0.497493	-0.683295	-0.403157	-0.62453	-0.769595	-0.599209	-0.746494	-0.701801	-0.258021	-0.416485	-0.400699	-0.325898	-0.343035	-0.221858	-0.373705	-0.124483	-0.302713
AT4G04020	O81439	PAP1	Probable plastid-lipid-associated protein 1, chloroplastic (AtPap1) (Fibrillin-1a) (Plastoglobulin 35) (AtPGL35)	0.547362	0.292981	0.668972	0.393614	0.0270583	0.0498379	0.000871276	0.00319828	16	16	15	68.6	68.6	63.8	34.948	323.31	215890000	97197000	118690000	0.329192	0.288081	0.430862	0.533234	0.386702	0.742495	0.652081	0.659559	0.658438	0.632289	0.249641	0.261076	0.243253	0.309452	0.401485	0.755464	0.575021	0.653655	0.448854	0.303814
AT2G29630	O82392	THIC	Phosphomethylpyrimidine synthase, chloroplastic (EC 4.1.99.17) (Hydroxymethylpyrimidine phosphate synthase) (HMP-P synthase) (HMP-phosphate synthase) (HMPP synthase) (Protein PYRIMIDINE REQUIRING) (Thiamine biosynthesis protein ThiC) (Protein THIAMINE C)	0.358498	0.292387	0.260664	0.209556	0.0297237	0.049914	0.00800848	0.0116533	18	18	18	44.1	44.1	44.1	71.986	323.31	218550000	104150000	114390000	0.158061	0.302072	0.185497	0.231833	0.170319	0.26521	0.150395	0.253341	0.329	0.305375	0.440134	0.269567	0.306251	0.189629	0.256353	0.382557	0.454996	0.345578	0.210516	0.398843
AT4G26530	O65581	M3E9.40	Fructose-bisphosphate aldolase 5, cytosolic (AtFBA5) (EC 4.1.2.13)	0.624891	0.478981	0.622626	0.406404	0.0116868	0.0297065	0.000871276	0.00915221	19	16	16	81	74.6	74.6	38.293	323.31	903410000	381600000	521810000	0.112171	0.427562	0.452377	0.557055	0.482857	0.695941	0.673394	0.625537	0.522127	0.596131	0.461132	0.444034	0.42784	0.561519	0.500378	0.797792	0.539176	0.637027	0.633506	0.516952
AT5G13650	F4K410;F4K409	At5g13650	Putative elongation factor TypA-like SVR3, chloroplastic (Protein HAPPY ON NORFLURAZON 23) (Protein SUPPRESSOR OF VARIEGATION 3);Elongation factor family protein	0.29198	0.419948	0.318424	0.241403	0.0332718	0.0474514	0.012046	0.0156917	20	20	20	46.7	46.7	46.7	74.314	323.31	183880000	93297000	90588000	0.384157	0.313731	0.11267	0.198742	0.197717	0.103747	0.373013	0.469218	0.31134	0.334802	0.419442	0.434445	0.191757	0.580714	0.473382	0.16595	0.351971	0.371386	0.245234	0.32536
AT4G33010	Q94B78;B3H5Y8	GLDP1	Glycine dehydrogenase (decarboxylating) 1, mitochondrial (EC 1.4.4.2) (Glycine cleavage system P protein 1) (Glycine decarboxylase 1) (Glycine decarboxylase P-protein 1) (AtGLDP1) (Glycine dehydrogenase (aminomethyl-transferring) 1);Glycine cleavage system P protein (EC 1.4.4.2)	0.32186	0.299753	0.353716	0.194936	0.0454859	0.0474514	0.00485346	0.0224953	43	43	25	63.5	63.5	38.5	112.92	323.31	2915200000	1405500000	1509700000	0.0674495	0.276839	0.197712	0.282096	0.150586	0.506429	0.275608	0.3642	0.326381	0.295964	0.335536	0.295886	0.312736	0.259414	0.295195	0.531598	0.391018	0.327457	0.118814	0.240413
AT2G16630	Q8RWG5	At2g16630	At2g16630 (Pollen Ole e 1 allergen and extensin family protein)	-2.07709	-2.2119	-2.31183	NaN	0.00255268	0.0297065	0.000871276	NaN	1	1	1	4.5	4.5	4.5	38.809	2.997	48857000	44374000	4484000	NaN	NaN	NaN	-2.35966	-2.40449	NaN	-2.3279	-2.17597	NaN	-2.43163	-1.58641	-2.05282	NaN	-2.77511	-2.43327	-2.28655	-1.57113	-2.14128	-1.97861	-2.40786
AT5G47030	Q96252		ATP synthase subunit delta', mitochondrial (F-ATPase delta' subunit)	-0.466843	-0.402424	NaN	-0.294382	0.0288575	0.049914	NaN	0.0217261	3	3	3	16.7	16.7	16.7	21.547	9.3742	49884000	30014000	19870000	-0.311311	-0.234799	-0.337037	NaN	NaN	NaN	NaN	NaN	-0.418399	NaN	-0.399275	NaN	-0.286631	-0.521235	-0.402556	-0.595985	-0.397684	-0.356994	-0.336331	-0.64722
AT2G38230	O80448	PDX1.1	2) (PLP synthase subunit PDX1.1) (EC 4.3.3.6) (HEVER-like protein);Pyridoxal 5'-phosphate synthase subunit PDX1.1 (AtPDX1.1) (AtPDX1	0.370263	0.342749	0.311963	0.158343	0.0268008	0.0474514	0.00485346	0.106722	16	16	12	73.5	73.5	59.2	32.862	292.04	362430000	169040000	193390000	0.0860907	0.271814	-0.0502975	0.125866	0.358242	0.387069	0.234381	0.235572	0.361277	0.341518	0.258216	0.394905	0.322946	0.294322	0.443356	0.380715	0.266731	0.456384	0.383388	0.364099
AT5G50920	Q9FI56	CLPC1	Chaperone protein ClpC1, chloroplastic (ATP-dependent Clp protease ATP-binding subunit ClpC homolog 1) (Casein lytic proteinase C1) (Protein DE-REGULATED CAO ACCUMULATION 1) (Protein IRON-RESCUED MUTANT 1)	0.235725	0.276966	0.142156	0.282011	0.0435426	0.0474514	0.0570187	0.00444952	43	43	17	62.9	62.9	25.2	103.45	323.31	2339400000	1192000000	1147300000	0.263155	0.371711	0.23975	0.271905	0.263535	0.276428	0.119319	0.11749	0.0460079	0.151536	0.261109	0.319829	0.263034	0.261666	0.279193	0.309739	0.281052	0.279981	0.134656	0.173195
AT1G42550	Q9C8E6;Q9C8E6-2	T8D8.2	Protein PLASTID MOVEMENT IMPAIRED 1	0.33807	0.282024	0.0864812	0.0699597	0.0270583	0.049914	0.379915	0.349762	12	12	12	24.1	24.1	24.1	93.874	49.502	28516000	15440000	13077000	0.0980652	0.222666	-0.0745701	0.127681	-0.0240437	-0.0442014	0.303926	0.0180335	0.242117	-0.087469	0.321219	0.202867	0.27116	0.39763	0.217244	0.292346	0.29782	0.441672	0.35403	0.304483
AT1G70820	Q9SSL0	F15H11.7	At1g70820 (F15H11.7 protein) (Phosphoglucomutase, putative / glucose phosphomutase) (Putative phosphoglucomutase)	0.303269	0.299756	0.232091	0.264275	0.03066	0.049914	0.129401	0.129409	13	13	13	33.8	33.8	33.8	67.312	123.22	61377000	31425000	29952000	0.253894	-0.150178	0.751223	0.231443	0.234994	0.386829	0.158445	NaN	0.439633	-0.0565417	0.183548	0.224927	0.283209	0.407818	0.399277	0.384265	0.202883	0.309371	0.346118	0.273709
ATCG00670	P56772	clpP1	Chloroplastic ATP-dependent Clp protease proteolytic subunit 1 (EC 3.4.21.92) (Endopeptidase ClpP1) (pClpP)	0.0969165	0.330674	0.192014	0.26513	0.472429	0.049914	0.0476124	0.014659	4	4	4	39.3	39.3	39.3	22.123	138.96	53453000	28303000	25150000	NaN	0.375463	0.215324	0.24797	0.221762	0.151216	0.278927	0.0862449	NaN	0.251669	0.277394	0.504711	0.304733	0.207628	0.358903	0.407845	-0.133349	-0.0270601	0.176645	0.0605017
AT2G30695	Q945Q5	At2g30695	At2g30700/T11J7.9 (Bacterial trigger factor) (Expressed protein)	0.0969692	-0.835699	-0.850492	-0.705529	0.714211	0.0474514	0.00305176	0.00221337	6	6	6	40.7	40.7	40.7	22.26	17.56	20944000	11348000	9595600	-0.893654	-0.808046	-0.681689	-0.450738	-0.693518	-1.03118	NaN	-0.880243	-0.746325	-0.744222	NaN	NaN	-0.965115	-0.769446	-0.772535	0.471667	-0.298013	-0.44217	0.23641	0.516952
AT2G42740;AT3G58700;AT4G18730;AT5G45775	P42794-2;P42795;P42794	RPL11B;RPL11A	60S ribosomal protein L11-1 (L16A);60S ribosomal protein L11-2 (L16)	-0.103467	-0.320799	-0.352661	-0.295205	0.343177	0.049914	0.00485346	0.016104	8	8	8	58.1	58.1	58.1	19.775	87.181	207640000	119150000	88485000	-0.286639	-0.334432	-0.0514888	-0.447387	-0.35608	-0.513674	-0.28286	-0.322884	-0.305291	-0.338596	-0.311104	-0.143407	-0.346091	-0.450569	-0.352822	-0.269157	-0.226106	-0.0432022	0.105085	-0.0839541
AT2G47470	A8MSC5;O22263;F4IL52;F4IL53	UNE5;PDIL2-1	AT2G47470 protein (Thioredoxin family protein);Protein disulfide-isomerase like 2-1 (AtPDIL2-1) (EC 5.3.4.1) (P5) (Protein MATERNAL EFFECT EMBRYO ARREST 30) (Protein UNFERTILIZED EMBRYO SAC 5) (Protein disulfide isomerase 11) (AtPDI11) (Protein disulfide-isomerase A6) (Protein disulfide-isomerase like 4-1) (AtPDIL4-1);Thioredoxin family protein	-0.210047	-0.391155	-0.32614	-0.327555	0.0640766	0.0474514	0.0119353	0.0027084	11	11	11	42.1	42.1	42.1	36.564	121.37	140430000	82107000	58325000	-0.277667	-0.3826	-0.303635	-0.303888	-0.369983	-0.339783	-0.428697	-0.445013	-0.100453	-0.316753	-0.52461	-0.38642	-0.3295	-0.325806	-0.38944	-0.243907	-0.157668	-0.182383	-0.111765	-0.354511
AT5G09660	F4KDZ4;Q9ZP05;A8MRP1;B3H560	PMDH2	Malate dehydrogenase 2, peroxisomal (EC 1.1.1.37) (Microbody NAD-dependent malate dehydrogenase) (mbNAD-MDH) (Peroxisomal NAD-dependent malate dehydrogenase 2) (pxNAD-MDH2) (Peroxisomal malate dehydrogenase 2) (Peroxisomal MDH2);Malate dehydrogenase (EC 1.1.1.37)	0.0308674	0.267882	0.333967	0.250017	0.851945	0.049914	0.0470765	0.0232623	17	17	16	79.6	79.6	76	34.975	323.31	1861000000	930570000	930410000	0.211886	0.219407	0.3496	0.416097	0.0530955	0.749907	0.158855	0.275246	0.126765	0.359064	0.247836	0.361995	0.186352	0.216875	0.326353	0.0226051	0.217029	0.342855	-0.149016	-0.279136
AT5G26742	Q8L7S8-2;Q8L7S8;F4K180	RH3;emb1138	DEAD-box ATP-dependent RNA helicase 3, chloroplastic (EC 3.6.4.13) (Protein EMBRYO DEFECTIVE 1138);DEAD box RNA helicase (RH3)	0.228029	0.421533	0.265864	0.332847	0.0635855	0.0474514	0.0310417	0.0027084	26	26	26	49	49	49	80.999	323.31	285140000	139510000	145620000	0.355594	0.394658	0.318674	0.311631	0.283677	0.0639675	0.404851	0.124117	0.377068	0.359319	0.45043	0.265037	0.48169	0.292703	0.617804	0.232058	0.410631	0.132925	0.147492	0.217039
AT3G13750	Q9SCW1	BGAL1	Beta-galactosidase 1 (Lactase 1) (EC 3.2.1.23)	0.137473	0.837776	NaN	0.729752	0.625535	0.0474514	NaN	0.00279385	6	6	6	9.9	9.9	9.9	93.658	72.257	11791000	5437800	6353200	0.926871	0.564737	NaN	0.757927	0.669474	NaN	NaN	NaN	NaN	NaN	0.747106	NaN	0.797947	0.968275	NaN	-0.163408	0.740852	0.21012	NaN	-0.237672
AT3G11930	F4J8J7;Q9SF06;F4J7I5;B9DG73	At3g11930;F26K24.22	Adenine nucleotide alpha hydrolases-like superfamily protein;AT3G11930 protein (Adenine nucleotide alpha hydrolases-like superfamily protein);AT3g11930/MEC18.3 (Adenine nucleotide alpha hydrolases-like superfamily protein) (F26K24.22 protein) (MEC18.3/MEC18.3)	-0.225768	-0.402782	-0.149662	-0.254566	0.0552058	0.049914	0.308689	0.0342636	6	6	6	37.7	37.7	37.7	21.457	57.47	47337000	28119000	19218000	-0.180285	-0.33587	-0.0285977	-0.232459	-0.495616	-0.0506907	0.01467	-0.177146	-0.608763	0.0736201	-0.425837	NaN	-0.48662	-0.406511	-0.292161	-0.371983	-0.255824	-0.157952	-0.133113	-0.209966
AT5G42765	F4K329	At5g42765	Plasma membrane fusion protein	0.0447256	-0.905886	-0.18017	-0.279999	0.843301	0.0474514	0.528368	0.0301983	6	6	6	37.1	37.1	37.1	25.098	85.852	40728000	24758000	15970000	-0.140864	-0.523857	-0.193836	-0.433876	-0.107562	NaN	-0.53815	0.373113	-0.375474	NaN	-0.886421	NaN	-1.08088	-0.750358	NaN	0.673139	-0.0790619	-0.0111961	-0.0772488	-0.282004
AT3G53460	Q43349-2;Q43349;F4JAF3	CP29A;CP29	29 kDa ribonucleoprotein, chloroplastic (RNA-binding protein CP29A) (RNA-binding protein cp29);Chloroplast RNA-binding protein 29	0.149216	0.284063	0.0114054	0.215841	0.114371	0.049914	0.905078	0.0232623	9	6	6	40.1	34.1	34.1	35.243	323.31	352520000	183730000	168790000	0.227435	0.35684	0.0900887	0.117599	0.287242	-0.186314	-0.0219836	-0.0990313	0.125497	0.238859	0.312613	0.278816	0.200294	0.409893	0.218698	0.238422	0.190964	0.0213972	0.100389	0.194906
AT5G52310	Q06738	LTI78	Low-temperature-induced 78 kDa protein (Desiccation-responsive protein 29A)	NaN	-0.611113	NaN	-0.648094	NaN	0.0474514	NaN	0.00367615	11	11	11	32.4	32.4	32.4	77.855	112.23	13748000	9336300	4412100	-0.400161	-0.965563	-0.693043	-0.598349	-0.583356	NaN	NaN	NaN	NaN	NaN	-0.656435	-0.763469	-0.273715	-0.456823	-0.905123	NaN	NaN	-0.341476	NaN	NaN
AT5G54770	Q38814-2;Q38814	THI1	Thiamine thiazole synthase, chloroplastic (Thiazole biosynthetic enzyme)	0.191901	0.293405	0.104076	0.196869	0.0862194	0.0474514	0.18713	0.0217261	14	14	14	95.4	95.4	95.4	29.362	323.31	692070000	361470000	330600000	0.18612	0.172593	0.30813	0.247585	0.0699158	0.207091	-0.00487861	0.0521239	0.256461	0.00958501	0.236542	0.228392	0.340191	0.3474	0.314502	0.194994	0.334565	0.246375	0.0441316	0.139438
AT3G45140	P38418	LOX2	Lipoxygenase 2, chloroplastic (AtLOX2) (EC 1.13.11.12)	-0.102318	-0.283382	-0.0719013	-0.179373	0.298102	0.049914	0.528368	0.0439918	50	50	50	70.8	70.8	70.8	102.04	323.31	1998400000	1132800000	865590000	-0.0197509	-0.223332	-0.314707	-0.098395	-0.240678	0.158708	-0.0225644	-0.163143	0.055935	-0.388442	-0.409446	-0.276344	-0.200574	-0.268422	-0.262126	-0.0711558	-0.201822	0.0138027	-0.250129	-0.00228563
AT1G49970	Q9XJ35	CLPR1	ATP-dependent Clp protease proteolytic subunit-related protein 1, chloroplastic (ClpR1) (Protein SUPPRESSOR OF VARIEGATION 2) (nClpP5)	-0.380756	0.409267	-0.264298	NaN	0.210152	0.049914	0.165443	NaN	6	6	6	20.9	20.9	20.9	42.627	36.712	40831000	23667000	17164000	-0.317218	NaN	NaN	NaN	-0.310344	0.0237409	-0.494339	NaN	NaN	-0.322295	0.368742	NaN	0.503587	0.291255	0.473485	-0.430411	-0.941915	-0.599264	0.356525	-0.288717
AT2G16600	Q38900;Q38900-2	CYP19-1	Peptidyl-prolyl cis-trans isomerase CYP19-1 (PPIase CYP19-1) (EC 5.2.1.8) (Cyclophilin of 19 kDa 1) (Rotamase cyclophilin-3)	-0.114031	-0.269065	-0.0971776	-0.135108	0.280813	0.049914	0.64596	0.103624	8	6	6	70.5	61.8	61.8	18.492	323.31	371690000	203880000	167810000	-0.110978	0.0373711	-0.30445	-0.189302	-0.10818	-0.246616	-0.229453	-0.227746	0.62866	-0.410733	-0.180345	-0.322855	-0.360258	-0.237426	-0.244439	-0.157679	0.0425285	-0.0457827	-0.311327	-0.0978964
AT1G11840	O65398;F4IAH9;B9DFN6	F12F1.32;GLX1	Lactoylglutathione lyase GLX1 (EC 4.4.1.5) (Glyoxalase I) (AtGLX1) (GlyI)	0.0767734	-0.419457	-0.13896	-0.0262741	0.446186	0.049914	0.312537	0.693968	9	8	8	35.7	30	30	31.928	103.87	58993000	34521000	24472000	0.064354	NaN	-0.0608776	-0.0106959	-0.0978769	-0.227419	-0.107667	-0.0682081	0.204159	-0.495664	-0.238288	NaN	-0.430245	-0.493354	-0.51594	0.223186	-0.0293515	0.0194658	-0.0465053	0.217072
AT5G28500	Q9LKR8	RAF1	Rubisco accumulation factor 1.1, chloroplastic	-0.0238263	0.339347	-0.0575372	0.126492	0.755046	0.0474514	0.448567	0.139202	13	13	13	41.2	41.2	41.2	48.236	323.31	144140000	76734000	67401000	0.174062	0.247065	0.125999	-0.104938	0.190273	-0.166802	-0.144698	-0.137093	0.0733594	0.0875474	0.221202	0.417482	0.261359	0.45366	0.343033	0.00126801	-0.12129	0.00226174	-0.0406047	0.0392335
ATCG00710	P56780	psbH	Photosystem II reaction center protein H (PSII-H) (Photosystem II 10 kDa phosphoprotein)	-1.07722	-0.401544	-0.480056	-0.247716	0.0332718	0.0703132	0.00887824	0.0276019	1	1	1	15.1	15.1	15.1	7.7018	35.25	715880000	429060000	286810000	-0.340952	-0.278246	-0.409355	-0.200382	-0.00964288	-0.538718	NaN	-0.47209	-0.429359	NaN	-0.566909	NaN	-0.473373	-0.106737	-0.459156	-1.4592	-0.682645	-0.381554	-1.55723	-1.30549
AT1G75950	Q39255	SKP1A	SKP1-like protein 1A (SKP1-like 1) (UFO-binding protein 1)	-0.218028	NaN	-0.229159	-0.180815	0.0411383	NaN	0.00840641	0.0275729	3	3	1	17.5	17.5	9.4	17.857	61.171	18167000	10954000	7213100	-0.106799	-0.119387	-0.327306	-0.212802	-0.13778	-0.245981	-0.238083	-0.289827	-0.1517	-0.220206	-0.125107	NaN	NaN	NaN	NaN	-0.266886	-0.189505	-0.222903	-0.230675	-0.18017
AT3G07470	Q94AG1	At3g07470	AT3g07470/F21O3_18	1.05883	0.192191	1.06438	0.877678	0.0438846	0.487992	0.00333296	0.0214504	5	5	3	30.2	30.2	23.1	18.779	25.911	28145000	12667000	15478000	0.676906	0.318856	1.42806	NaN	1.08689	1.01752	1.38192	0.843957	1.01412	NaN	0.139519	-0.106227	NaN	-0.0829082	0.818381	0.689176	1.48572	NaN	1.00159	NaN
AT4G25130	P54150	MSR4	Peptide methionine sulfoxide reductase A4, chloroplastic (AtMSRA4) (EC 1.8.4.11) (Peptide-methionine (S)-S-oxide reductase) (Peptide Met(O) reductase) (Protein-methionine-S-oxide reductase)	0.250979	0.223124	0.273792	0.191518	0.0418482	0.0595994	0.00908741	0.0274121	5	5	5	29.8	29.8	29.8	28.644	229.98	245350000	128320000	117020000	0.0441758	0.312386	0.1638	0.180428	0.256802	0.213484	0.280294	0.417266	0.187713	0.270201	0.200827	0.215084	0.286508	0.12323	0.28997	0.310845	0.341854	0.20313	0.128028	0.271039
AT5G28020	Q9SXS7;F4K5T1	CYSD2	2) (ARAth-Bsas4;2) (Cysteine synthase D2) (AtcysD2) (O-acetylserine (thiol)-lyase 6);Bifunctional L-3-cyanoalanine synthase/cysteine synthase D2 (EC 2.5.1.47) (EC 4.4.1.9) (Beta-substituted Ala synthase 4;Cysteine synthase D2	-0.381882	-0.351657	-0.480008	-0.468234	0.0332718	0.113647	0.00359236	0.0019144	5	3	3	23.5	18	18	34.317	62.116	62496000	36256000	26241000	-0.454506	-0.559976	-0.419809	-0.438207	-0.46867	-0.542449	-0.326463	-0.362509	-0.579226	-0.589394	-0.5987	-0.0383949	-0.473745	-0.295788	NaN	-0.154813	-0.541925	-0.479508	-0.356993	-0.376171
AT1G17100	Q9SHG8	F20D23.21	At1g17100 (SOUL heme-binding family protein) (SOUL-like protein) (Similar to SOUL Protein)	0.361473	0.172649	0.324384	0.222301	0.0325881	0.113647	0.00305176	0.0232623	8	8	8	64.2	64.2	64.2	25.388	290.43	110220000	52121000	58100000	0.127864	0.212475	0.152684	0.424981	0.193499	0.326485	0.328439	0.32276	0.361232	0.283005	0.0585169	0.0800834	0.271715	0.239199	0.213733	0.559202	0.349479	0.383425	0.313241	0.202016
AT1G29470	Q6NPR7		Probable methyltransferase PMT24 (EC 2.1.1.-)	-0.373397	NaN	-0.198229	-0.177517	0.03165	NaN	0.0244779	0.045781	8	8	7	14.3	14.3	13.1	87.204	37.283	14003000	8115600	5887600	-0.0254886	-0.16094	-0.157447	-0.358781	-0.184929	-0.113713	-0.321737	-0.181858	-0.116722	-0.257116	-0.0335202	NaN	NaN	NaN	NaN	-0.467951	-0.504981	-0.404053	-0.176285	-0.313717
AT2G30860	O80852;O80852-2	GSTF9	Glutathione S-transferase F9 (AtGSTF9) (EC 2.5.1.18) (AtGSTF7) (GST class-phi member 9)	-0.35757	-0.277248	-0.399287	-0.281871	0.0411383	0.055536	0.00864968	0.0188557	8	7	7	53.5	49.3	49.3	24.146	323.31	943360000	570020000	373340000	-0.442883	-0.276736	-0.31527	-0.0383122	-0.336153	-0.214159	-0.551974	-0.437537	-0.260046	-0.532717	-0.407301	-0.243847	-0.161905	-0.236699	-0.336489	-0.28194	-0.214558	-0.225884	-0.56683	-0.498639
AT1G20450	F4HST2;P42759	ERD10	Dehydrin ERD10 (Low-temperature-induced protein LTI45);Dehydrin family protein	-0.692264	-0.329312	-0.460358	-0.520453	0.03066	0.255108	0.0246334	0.00567797	8	8	8	37.1	37.1	37.1	29.443	221.8	69024000	43960000	25064000	-0.340259	-0.601948	-0.710799	-0.655459	-0.293802	-0.819021	-0.242136	-0.356694	-0.192348	-0.691589	-0.82436	NaN	0.0752926	-0.0945469	-0.473632	-0.492728	-1.13986	-0.814132	-0.458619	-0.555983
AT1G20440	P31168	COR47	Dehydrin COR47 (Cold-induced COR47 protein)	-0.538704	-0.771164	-0.772666	-0.723519	0.0420764	0.101581	0.00726848	0.00221337	8	8	7	52.1	52.1	49.1	29.896	323.31	216070000	136250000	79818000	-0.909852	-0.604949	-0.834804	-0.760812	-0.507179	-0.832802	-0.8108	-0.247241	-1.0519	-0.920589	-1.03501	-1.68192	-0.151334	-0.208773	-0.778781	-0.489162	-0.937254	-0.676037	-0.421275	-0.16979
AT4G37925	Q2V2S7	ndhM	NAD(P)H-quinone oxidoreductase subunit M, chloroplastic (EC 1.6.5.-) (NAD(P)H dehydrogenase subunit M) (NDH subunit M) (NDH-M) (NADH-plastoquinone oxidoreductase subunit M)	0.344854	0.424389	0.365533	0.333489	0.0341533	0.055536	0.00305176	0.0131733	9	9	9	65.9	65.9	65.9	24.795	134.93	43617000	21388000	22229000	0.468663	0.281096	0.205761	NaN	0.378437	0.325355	0.452575	0.374615	0.353324	0.321798	0.465678	NaN	0.607557	0.389857	0.234464	0.432063	0.340349	0.407702	0.422958	0.1212
AT4G22240	O49629	PAP2	Probable plastid-lipid-associated protein 2, chloroplastic (AtPap2) (Fibrillin-1b)	0.367846	0.0989566	0.588896	0.320638	0.0332718	0.506972	0.00305176	0.0243942	9	8	8	49.4	44.5	44.5	33.655	163.01	24727000	12418000	12309000	0.554243	0.264624	0.193778	NaN	0.269906	0.483312	0.625267	0.605896	NaN	0.641111	-0.116731	0.16683	0.3441	0.00162733	NaN	0.522199	0.470212	0.362706	0.318975	0.165138
AT1G06690	Q94A68		Uncharacterized oxidoreductase At1g06690, chloroplastic (EC 1.-.-.-)	0.334723	0.309832	0.395443	0.402345	0.0333602	0.0671179	0.00305176	0.0027084	10	10	10	48	48	48	41.497	124.86	84319000	40663000	43656000	0.304639	0.518184	0.343001	0.384213	0.461686	0.36047	0.417751	0.508328	0.387406	0.30326	0.352428	0.0590335	0.32562	0.525161	0.286916	0.435489	0.355327	0.356805	0.125797	0.400196
AT2G42530	Q9SIN5	COR15B	Protein COLD-REGULATED 15B, chloroplastic (AtCOR15B)	-0.620571	-0.295614	-0.261773	-0.268707	0.0462398	0.0571585	0.0237411	0.00799301	10	10	8	43.3	43.3	37.6	14.961	323.31	468720000	282680000	186040000	-0.319238	-0.199882	-0.372109	-0.260783	-0.191523	-0.436612	-0.314845	-0.0548135	-0.275506	-0.227089	-0.200046	-0.303263	-0.457559	-0.152435	-0.364767	-0.564105	-0.422592	-0.26798	-0.644217	-1.20396
AT5G63400	O82514;F4KAP2	ADK1	Adenylate kinase 1;Adenylate kinase 4 (AK 4) (EC 2.7.4.3) (ATP-AMP transphosphorylase 4) (ATP:AMP phosphotransferase) (Adenylate monophosphate kinase 4) (AMK4)	-0.805828	-0.241091	-0.308961	-0.286062	0.0411383	0.0902491	0.0239808	0.0115716	10	10	10	49.2	49.2	49.2	26.932	82.869	60938000	37405000	23533000	-0.148099	-0.294234	-0.466116	-0.287328	-0.234531	-0.49961	-0.417145	-0.0692108	-0.194833	-0.364008	-0.315326	-0.123943	-0.397375	-0.0432938	-0.325515	-0.953677	-0.68364	-0.326949	-0.616052	-1.44882
AT1G09310	Q9ZPZ4	T31J12.3	T31J12.3 protein	-0.47802	-0.464877	-0.528389	-0.673109	0.0209257	0.0821803	0.00305176	0.0027084	10	10	9	60.3	60.3	60.3	19.947	191.65	443760000	269180000	174590000	-0.486509	-0.722183	-0.495343	-0.914656	-0.746853	-0.644196	-0.663764	-0.392128	-0.481867	-0.459989	-0.740599	-0.732754	-0.116746	-0.0723753	-0.661909	-0.468568	-0.535118	-0.569351	-0.485585	-0.33148
AT3G23700	Q9LK47	At3g23700	AT3g23700/MYM9_3 (Nucleic acid-binding proteins superfamily)	0.324715	0.28372	0.314309	0.227626	0.03066	0.121777	0.00840641	0.00603577	11	11	11	44.6	44.6	44.6	42.75	193.2	95450000	47659000	47791000	0.216246	0.234465	0.256481	0.2055	0.225438	0.167983	0.402978	0.365025	0.401271	0.234286	0.167337	0.0428383	0.266045	0.284231	0.658147	0.230978	0.329644	0.269367	0.45217	0.341417
AT1G56340	O04151;F4I529	CRT1;CRT1a	Calreticulin 1a;Calreticulin-1	-0.366926	-0.200747	-0.356701	-0.223651	0.0384702	0.17544	0.0124438	0.0276019	12	12	7	42.1	42.1	27.3	48.527	275.63	154630000	91899000	62728000	-0.286719	-0.42462	-0.0887748	-0.166143	-0.151999	-0.340599	-0.253567	-0.626778	-0.227859	-0.3347	-0.354495	-0.012215	-0.0900941	-0.450437	-0.096493	-0.119317	-0.324782	-0.409946	-0.513622	-0.466961
AT4G33510	Q00218;F4JIZ3	DHS2	Phospho-2-dehydro-3-deoxyheptonate aldolase 2, chloroplastic (EC 2.5.1.54) (3-deoxy-D-arabino-heptulosonate 7-phosphate synthase 2) (DAHP synthase 2) (Phospho-2-keto-3-deoxyheptonate aldolase 2);Phospho-2-dehydro-3-deoxyheptonate aldolase (EC 2.5.1.54)	0.2745	0.379682	0.580943	0.536784	0.03165	0.055536	0.0235018	0.00221337	14	14	10	41.8	41.8	33.9	56.148	323.31	118320000	58568000	59752000	0.507267	0.551633	0.692707	0.502786	0.429528	0.487696	0.380618	1.20843	0.42725	0.400721	0.230369	0.555442	0.376862	0.182447	0.553288	0.286877	0.342605	0.270049	0.18507	0.287897
AT1G43670	Q9MA79		Fructose-1,6-bisphosphatase, cytosolic (FBPase) (EC 3.1.3.11) (D-fructose-1,6-bisphosphate 1-phosphohydrolase) (Protein FRUCTOSE INSENSITIVE 1)	0.3708	0.220435	0.292234	0.202918	0.03066	0.0703132	0.0326934	0.0124029	15	15	15	52.2	52.2	52.2	37.287	323.31	449790000	220220000	229570000	0.148988	0.151821	0.283373	0.238568	0.191841	0.486236	0.165635	0.382786	0.0399626	0.386552	0.308224	0.210983	0.100625	0.171403	0.31094	0.461867	0.393076	0.48654	0.259082	0.253434
AT3G29360	Q9LIA8	UGD2	UDP-glucose 6-dehydrogenase 2 (UDP-Glc dehydrogenase 2) (UDP-GlcDH 2) (UDPGDH 2) (EC 1.1.1.22) (At-UGD2)	-0.338271	-0.288089	-0.349897	-0.256519	0.0378531	0.104605	0.00352325	0.0156917	15	15	6	45.6	45.6	20.2	53.172	82.371	86819000	55771000	31048000	-0.167368	-0.3848	-0.324801	-0.0996522	-0.305975	-0.270469	-0.336417	-0.415764	-0.419247	-0.30759	-0.299671	-0.0459814	-0.40374	-0.402965	NaN	-0.381532	-0.31942	-0.346617	-0.508726	-0.13506
AT1G09640	O04487		Probable elongation factor 1-gamma 1 (EF-1-gamma 1) (eEF-1B gamma 1)	-0.308868	-0.217799	-0.257931	-0.203733	0.03066	0.184898	0.0091508	0.00864871	16	7	7	47.1	19.6	19.6	46.66	103.09	141230000	78063000	63169000	-0.226924	-0.169748	-0.206441	-0.218361	-0.197191	-0.283129	-0.181062	-0.384458	-0.212409	-0.228599	-0.466984	NaN	-0.110283	-0.235587	-0.0583401	-0.304035	-0.263088	-0.33933	-0.393521	-0.244364
AT2G21330	Q9SJU4;F4IGL5;F4IGL7	FBA1	Fructose-bisphosphate aldolase 1, chloroplastic (AtFBA1) (EC 4.1.2.13);Fructose-bisphosphate aldolase (EC 4.1.2.13)	0.293027	0.209221	0.352119	0.226452	0.0418482	0.0571585	0.00396627	0.0232623	19	11	11	78.4	58.9	58.9	42.93	323.31	1919900000	940410000	979470000	0.0238191	0.312508	0.212935	0.319594	0.263405	0.394631	0.324532	0.434792	0.371937	0.234702	0.237801	0.181822	0.217562	0.210062	0.198856	0.397471	0.372731	0.359631	0.112315	0.222988
AT3G17390	Q9LUT2	METK4	S-adenosylmethionine synthase 4 (AdoMet synthase 4) (EC 2.5.1.6) (Methionine adenosyltransferase 4) (MAT 4)	-0.245992	-0.323999	-0.353246	-0.375183	0.0411383	0.0587096	0.00352079	0.00353385	20	13	11	75.8	50.4	44.5	42.795	323.31	666260000	399190000	267070000	-0.25892	-0.412437	-0.503044	-0.364265	-0.337251	-0.282555	-0.458693	-0.329276	-0.327383	-0.368322	-0.399057	-0.227598	-0.107783	-0.492189	-0.39337	-0.266082	-0.211594	-0.264396	-0.341507	-0.146381
AT1G20620	Q42547;B9DG18;F4HUL6;Q2V4M4	CAT3	AT1G20620 protein (Catalase 3);Catalase 3;Catalase-3 (EC 1.11.1.6)	-0.587657	-0.388252	-0.594111	-0.376727	0.0230159	0.0571585	0.00456242	0.00432575	20	16	15	58.3	49.4	46.5	56.695	323.31	1066400000	628470000	437970000	-0.327154	-0.426191	-0.243835	-0.373163	-0.513293	-0.299461	-0.607992	-0.723263	-0.566246	-0.773592	-0.66402	-0.308049	-0.141548	-0.391723	-0.435918	-0.638745	-0.555566	-0.645073	-0.748776	-0.350125
AT4G27440	P21218	PORB	Protochlorophyllide reductase B, chloroplastic (PCR B) (EC 1.3.1.33) (NADPH-protochlorophyllide oxidoreductase B) (POR B)	-0.333812	-0.243973	-0.27744	-0.417548	0.03066	0.0703132	0.0141121	0.0027084	20	20	16	61.6	61.6	56.1	43.359	323.31	538860000	322420000	216440000	-0.353653	-0.409649	-0.459335	-0.551524	-0.31358	-0.250318	-0.365076	-0.41633	-0.113038	-0.24244	-0.107693	-0.298715	-0.272469	-0.39765	-0.143339	-0.371495	-0.272729	-0.412069	-0.401222	-0.211543
AT4G35090	P25819;F4JM86	CAT2	Catalase (EC 1.11.1.6);Catalase-2 (EC 1.11.1.6)	0.291257	0.277675	0.307414	0.211097	0.0411383	0.0595994	0.00485346	0.0133387	21	21	12	65.4	65.4	46.1	56.931	323.31	1844800000	919600000	925160000	0.107383	0.248984	0.208374	0.298552	0.192191	0.340971	0.383543	0.333056	0.27353	0.205972	0.214537	0.112905	0.257106	0.406714	0.397111	0.468944	0.323944	0.290921	0.165198	0.207279
AT2G13360	Q56YA5	AGT1	Serine--glyoxylate aminotransferase (EC 2.6.1.45) (Alanine--glyoxylate aminotransferase) (AGT) (EC 2.6.1.44) (Asparagine aminotransferase) (EC 2.6.1.-) (Serine--pyruvate aminotransferase) (EC 2.6.1.51)	0.274863	0.376249	0.364666	0.244351	0.0348038	0.055536	0.00584612	0.0113128	22	22	22	83.8	83.8	83.8	44.207	323.31	1395100000	688410000	706650000	0.118235	0.31654	0.194619	0.292216	0.300145	0.422024	0.438015	0.37065	0.419222	0.173419	0.479229	0.59689	0.197259	0.201592	0.406277	0.289825	0.331412	0.339606	0.142336	0.271135
AT4G20360	P17745	TUFA	Elongation factor Tu, chloroplastic (EF-Tu) (Ras-related protein RABE1b) (AtRABE1b) (Ras-related protein Rab8D) (AtRab8D)	0.235333	0.211112	0.210402	0.222388	0.0418482	0.0571585	0.0124438	0.0145307	22	22	21	61.8	61.8	58.6	51.63	323.31	4542900000	2295300000	2247600000	0.0978606	0.291809	0.239064	0.30597	0.177237	0.289106	0.223662	0.132862	0.165998	0.24038	0.24227	0.221933	0.232803	0.211993	0.146561	0.311813	0.267919	0.244153	0.121347	0.231433
AT1G11860	O65396	GDCST	Aminomethyltransferase, mitochondrial (EC 2.1.2.10) (Glycine cleavage system T protein) (GCVT)	0.272929	0.0949722	0.234098	0.180818	0.0411383	0.295823	0.0063168	0.0301983	22	22	22	71.6	71.6	71.6	44.444	323.31	1785600000	941230000	844360000	0.00936174	0.227475	0.201226	0.255397	0.210631	0.257989	0.217003	0.261029	0.182523	0.251944	0.10187	-0.0488711	0.13799	0.10046	0.183412	0.419172	0.337334	0.236489	0.16997	0.201682
AT1G09340	Q9SA52	CSP41B	Chloroplast stem-loop binding protein of 41 kDa b, chloroplastic (CSP41-b) (Heteroglycan-interacting protein 1.3) (Protein CHLOROPLAST RNA BINDING) (Protein Gb5f)	0.207051	0.122747	0.241993	0.172892	0.0411383	0.164787	0.00961317	0.0270338	22	22	22	70.6	70.6	70.6	42.619	323.31	3012000000	1470800000	1541200000	0.0409662	0.236659	0.24066	0.194884	0.15129	0.29707	0.306117	0.159229	0.17275	0.274797	0.101916	0.112258	0.0730022	0.187718	0.138843	0.203922	0.192216	0.250533	0.202493	0.186092
AT3G16240	Q41951	TIP2-1	Aquaporin TIP2-1 (Delta-tonoplast intrinsic protein) (Delta-TIP) (Tonoplast intrinsic protein 2-1) (AtTIP2;1) [Cleaved into: Aquaporin TIP2-1, N-terminally processed]	0.449084	-0.0387147	0.269909	0.156153	0.0315204	0.789401	0.0346558	0.0629837	2	2	2	20.8	20.8	20.8	25.027	109.97	80588000	40056000	40532000	0.195117	0.00435358	0.324663	0.132001	0.12463	0.182617	0.511128	0.230284	0.356901	0.0686155	-0.0435141	NaN	0.0603397	-0.265339	0.0936546	0.309739	0.359296	0.308175	0.61797	0.650242
AT3G56290	Q9LYL4	F18O21_250	UNKNOWN PROTEIN	0.380234	NaN	NaN	0.252481	0.0432757	NaN	NaN	0.0211479	2	2	2	22	22	22	19.922	48.288	12098000	5907200	6190500	0.18271	0.188412	NaN	0.257694	0.381108	NaN	0.418322	NaN	0.272512	NaN	0.516485	NaN	0.335527	NaN	NaN	0.453378	NaN	0.221177	0.524612	0.321771
AT1G09830	P52420	PUR2	Phosphoribosylamine--glycine ligase, chloroplastic (EC 6.3.4.13) (Glycinamide ribonucleotide synthetase) (GARS) (Phosphoribosylglycinamide synthetase)	0.480338	0.0395411	0.00735372	0.135097	0.0462398	0.726024	0.92164	0.0396305	2	2	2	6.2	6.2	6.2	56.473	54.027	14197000	7403100	6793700	0.118537	0.136838	0.197696	0.175982	0.0464298	NaN	0.0655954	-0.0360861	NaN	-0.00744814	0.192798	-0.0359561	0.0149254	-0.13661	0.162548	NaN	NaN	0.39336	0.623784	0.423869
AT4G27500	O23144	PPI1	Proton pump-interactor 1	-0.543103	NaN	NaN	-1.02738	0.0393192	NaN	NaN	0.0094947	2	2	2	3.6	3.6	3.6	68.878	16.15	8289000	5103600	3185400	NaN	-0.696696	-1.07443	NaN	-1.31101	NaN	NaN	-1.01679	NaN	-1.06608	NaN	NaN	-0.322682	NaN	-0.554307	-0.922571	-0.603662	-0.584354	-0.216849	-0.388079
AT1G55670	Q9S7N7	PSAG	Photosystem I reaction center subunit V, chloroplastic (PSI-G)	-0.348336	-0.0306875	-0.205926	-0.252583	0.0440747	0.954964	0.144198	0.0439918	3	3	3	10.6	10.6	10.6	17.085	37.781	334220000	186510000	147710000	-0.481365	-0.219117	-0.398579	-0.00589666	-0.157959	-0.0830659	-0.480177	-0.00379375	-0.256667	NaN	-0.589166	0.871479	NaN	0.498267	-0.90333	-0.58782	-0.397809	-0.348376	-0.119472	-0.288202
AT4G29410	Q9M0E2	RPL28C	60S ribosomal protein L28-2	-0.650978	NaN	-0.592143	NaN	0.0333602	NaN	0.0167763	NaN	5	4	4	42	32.9	32.9	15.91	6.7381	16358000	9900200	6458200	NaN	NaN	NaN	NaN	NaN	NaN	-0.49399	-0.267535	-0.807148	-0.7999	-0.498186	NaN	-0.52121	NaN	NaN	-0.626095	-0.547556	NaN	-0.441943	-0.988319
AT5G51110	F4KBV0;Q9LU63	At5g51110;pdl1	Probable pterin-4-alpha-carbinolamine dehydratase, chloroplastic (EC 4.2.1.96) (4-alpha-hydroxy-tetrahydropterin dehydratase) (PCD/DCoH-like protein 1) (Protein AIRP2 TARGET PROTEIN 1) (Protein SDIR1-INTERACTING PROTEIN 1);Transcriptional coactivator/pterin dehydratase	0.254738	-0.0210619	0.117504	0.189145	0.0450224	0.917896	0.148206	0.0270338	5	5	5	48.2	48.2	48.2	20.908	117.83	46723000	22720000	24003000	0.198765	0.172593	0.255897	NaN	0.129325	NaN	-0.0130691	0.164989	0.189855	0.128241	0.0638284	NaN	-0.305976	0.178962	NaN	0.133296	0.310557	0.381404	0.272617	0.175815
AT1G56330	Q01474	SAR1B	GTP-binding protein SAR1B	-0.432575	-0.0571458	-0.249059	-0.235285	0.0296703	0.789153	0.0465939	0.0570479	6	6	1	46.1	46.1	11.4	21.986	46.06	36598000	22254000	14345000	NaN	NaN	-0.109249	-0.311152	-0.285453	NaN	NaN	-0.33458	-0.229976	-0.182622	-0.255274	NaN	-0.165792	0.359496	-0.167013	-0.275451	-0.611722	-0.421056	-0.354188	-0.500457
AT5G39570	Q9FKA5		Uncharacterized protein At5g39570	-0.339807	-0.178427	NaN	-0.264509	0.042917	0.201798	NaN	0.016104	6	6	6	35.2	35.2	35.2	43.526	205.39	36528000	21556000	14973000	-0.210441	-0.122724	-0.448464	-0.328181	-0.212736	NaN	NaN	NaN	NaN	-0.133383	-0.382235	-0.318978	0.0355912	-0.0345246	-0.19199	-0.260958	-0.488929	-0.516565	-0.295244	-0.137338
AT3G14290	Q42134	PAE2	Proteasome subunit alpha type-5-B (EC 3.4.25.1) (20S proteasome alpha subunit E-2) (Proteasome component Z)	-0.416213	NaN	-0.156753	-0.333616	0.0318466	NaN	0.270585	0.00726176	7	1	1	42.6	6.8	6.8	25.977	113.3	26169000	15011000	11158000	-0.330481	-0.474282	-0.31884	-0.378781	-0.165697	-0.150762	-0.324647	-0.393756	0.276406	-0.191004	NaN	-0.283235	NaN	NaN	NaN	-0.576629	-0.156959	-0.433874	-0.503018	-0.410584
AT5G10860	Q9LEV3	CBSX3	CBS domain-containing protein CBSX3, mitochondrial	-0.463979	-0.285082	NaN	-0.491584	0.0438846	0.107275	NaN	0.0176658	7	7	7	51	51	51	22.729	157.69	37859000	25040000	12819000	-0.29258	NaN	NaN	-0.586053	-0.59612	NaN	NaN	NaN	NaN	NaN	-0.268385	NaN	-0.118664	-0.235066	-0.518215	-0.608712	-0.628472	-0.283144	-0.121538	-0.678029
AT2G20630	Q9SIU8-2;Q9SIU8	PPC3-1.2	1.2);Probable protein phosphatase 2C 20 (AtPP2C20) (EC 3.1.3.16) (AtPPC3	-0.238638	-0.595479	-0.572735	-0.737741	0.0449837	0.055536	0.0857765	0.0187294	7	7	7	35.8	35.8	35.8	30.496	33.366	20383000	11177000	9205500	-0.176173	-1.02882	-0.840836	NaN	-0.905134	-0.327901	-0.325244	NaN	NaN	-1.06506	-0.805789	NaN	-0.562058	-0.268306	-0.745764	-0.304903	-0.265435	-0.146554	-0.324446	-0.151851
AT5G24490	Q94K97	At5g24490	30S ribosomal protein	0.229779	0.133699	0.33327	0.191268	0.0411383	0.161726	0.00352079	0.161898	8	8	8	43.8	43.8	43.8	34.856	323.31	192930000	95470000	97459000	0.204096	0.380607	0.250899	-0.238184	0.35892	0.306645	0.317206	0.411821	0.268688	0.361989	0.242967	0.139802	0.12257	0.106593	0.0565623	0.171486	0.281575	0.214525	0.176516	0.304794
AT2G40100	Q9S7W1;F4IGY6	LHCB4.3	Chlorophyll a-b binding protein CP29.3, chloroplastic (LHCB4.3) (LHCII protein 4.3);"Chlorophyll a-b binding protein, chloroplastic"	0.438998	0.38852	0.255368	0.123013	0.0270583	0.113647	0.0463559	0.194132	8	8	8	43.8	43.8	43.8	30.211	80.889	168180000	81712000	86467000	0.277748	-0.147113	0.219006	0.158741	0.106681	-0.0309558	0.231867	0.440022	0.266692	0.369213	0.419073	NaN	-0.0146755	0.60853	0.541152	0.611192	0.490142	0.43365	0.303562	0.356443
AT1G31800	Q93VK5	CYP97A3	Protein LUTEIN DEFICIENT 5, chloroplastic (EC 1.14.-.-) (Cytochrome P450 97A3)	0.375395	NaN	0.665129	NaN	0.03066	NaN	0.0152366	NaN	8	8	8	20.2	20.2	20.2	66.845	16.195	15535000	6850900	8684100	NaN	NaN	NaN	0.537232	0.933364	NaN	0.436607	NaN	0.843895	0.714886	0.345046	NaN	NaN	NaN	NaN	0.527679	0.212101	0.369731	0.312457	0.455009
AT1G76180	P42763	ERD14	Dehydrin ERD14	-0.543248	-0.672342	-0.891341	-0.79964	0.03066	0.173906	0.0857765	0.01251	8	7	7	55.1	50.8	50.8	20.786	101.74	88824000	51515000	37309000	-0.348793	-1.10615	-1.05041	NaN	-0.693209	-1.48866	-1.0365	NaN	-0.148862	NaN	-0.909842	-1.81323	-0.357304	0.133314	-0.41465	-0.369124	-0.713415	-0.754596	-0.610945	-0.26816
AT4G15545	Q93W28		Uncharacterized protein At4g15545	0.367697	NaN	0.225013	0.0777153	0.024238	NaN	0.00827714	0.288731	9	9	9	41.5	41.5	41.5	37.206	125.13	51029000	23479000	27550000	0.218826	0.144967	-0.0705655	0.00103626	0.0943124	0.210087	0.22637	0.175671	0.292598	0.220338	0.152902	NaN	0.270938	NaN	NaN	0.382557	0.435864	0.330209	0.327173	0.362681
AT2G02930;AT4G02520	P46422;Q9SLM6	GSTF2;GSTF3	Glutathione S-transferase F2 (AtGSTF2) (EC 2.5.1.18) (24 kDa auxin-binding protein) (AtPM24) (GST class-phi member 2);Glutathione S-transferase F3 (AtGSTF3) (EC 2.5.1.18) (GST class-phi member 3) (Glutathione S-transferase 16)	-0.355829	-0.280725	-0.332513	-0.143156	0.0420109	0.0721413	0.00657033	0.235745	12	12	10	77.8	77.8	70.3	24.128	323.31	497340000	300490000	196850000	-0.00880599	-0.511352	-0.111325	0.0705832	-0.154879	-0.2217	-0.450048	-0.323859	-0.423263	-0.243696	-0.506807	-0.0861118	-0.272388	-0.178322	-0.359998	-0.359502	-0.262136	-0.203514	-0.314838	-0.639156
AT2G20420	O82662		Succinate--CoA ligase [ADP-forming] subunit beta, mitochondrial (EC 6.2.1.5) (Succinyl-CoA synthetase beta chain) (SCS-beta)	-0.444419	-0.306767	-0.119575	-0.296308	0.0270583	0.055536	0.415198	0.00432575	12	12	12	41.1	41.1	41.1	45.345	84.585	71753000	45004000	26749000	-0.29191	-0.298619	-0.261557	-0.240343	-0.38911	0.219444	-0.289578	0.146298	-0.389582	-0.284458	-0.3135	NaN	-0.264739	-0.263788	-0.385041	-0.536963	-0.307418	-0.33623	-0.448311	-0.593172
AT5G38480	P42644;P42644-2	GRF3	14-3-3-like protein GF14 psi (General regulatory factor 3) (Protein RARE COLD INDUCIBLE 1A)	-0.264703	-0.0442396	-0.0691118	-0.206797	0.0411383	0.671894	0.57745	0.0174374	13	10	8	59.6	48.6	43.9	28.606	313.8	203960000	120710000	83251000	-0.0871769	-0.17009	-0.300381	-0.273257	-0.203081	0.259699	-0.301439	-0.240887	0.076553	-0.139485	-0.0708661	0.0899689	0	-0.243823	0.00352213	-0.23589	-0.218786	-0.174298	-0.274204	-0.420338
AT3G14210	Q9LJG3	ESM1	GDSL esterase/lipase ESM1 (EC 3.1.1.-) (Extracellular lipase ESM1) (Protein EPITHIOSPECIFIER MODIFIER 1) (AtESM1)	-0.310809	-0.116809	-0.257004	-0.0101834	0.0411383	0.215217	0.0485231	0.872954	14	14	14	52.6	52.6	52.6	44.06	323.31	2279100000	1321000000	958140000	-0.0202836	-0.0671229	0.0595527	0.0947968	-0.11786	0.0698871	-0.376687	-0.345538	-0.364221	-0.268459	-0.125502	-0.0998454	0.0114744	-0.225527	-0.144645	-0.301709	-0.182133	-0.214245	-0.486472	-0.369485
AT4G23600	Q9SUR6;F4JP99;Q9SUR6-2	CORI3	Cystine lyase CORI3 (EC 4.4.1.35) (Protein CORONATINE INDUCED 3) (Protein JASMONATE RESPONSIVE 2);Tyrosine transaminase family protein	-0.547209	-0.513005	-0.251748	-0.655544	0.0411383	0.060581	0.177355	0.00444952	16	16	16	53.1	53.1	53.1	47.038	133.48	107230000	71045000	36186000	-0.354716	-0.988892	-0.707593	-0.617283	-0.609236	NaN	NaN	-0.0878115	-0.116868	-0.550566	-0.927268	-0.648026	-0.311218	-0.144681	-0.53383	-0.608267	NaN	-0.637396	-0.716033	-0.227141
AT5G14740	P42737-2;P42737;F4K875;F4K873;A8MQY4	BCA2;CA2	Beta carbonic anhydrase 2, chloroplastic (AtbCA2) (AtbetaCA2) (EC 4.2.1.1) (Beta carbonate dehydratase 2);Carbonic anhydrase (EC 4.2.1.1) (Carbonate dehydratase)	0.239897	0.133142	0.205307	0.163387	0.0478094	0.175596	0.0992266	0.0325866	21	21	14	89.6	89.6	54.8	28.344	323.31	6919700000	3492900000	3426800000	0.197715	0.181596	0.163211	0.249894	0.0245212	0.517136	0.00805053	0.06709	0.173568	0.260692	0.184375	0.145754	0.139086	-0.0159555	0.212449	0.368948	0.195688	0.295623	0.132613	0.206614
AT5G58800	Q9LUX9		Probable NAD(P)H dehydrogenase (quinone) FQR1-like 3 (EC 1.6.5.2)	0.433946	NaN	NaN	NaN	0.0209257	NaN	NaN	NaN	1	1	1	7.7	7.7	7.7	22.723	51.016	4373500	2189600	2183900	NaN	0.332313	NaN	NaN	0.276378	NaN	NaN	NaN	NaN	NaN	NaN	NaN	NaN	NaN	NaN	0.492043	0.494095	0.413028	0.435784	0.334781
AT4G25500;AT5G52040	P92965-3;P92965-2;P92966-3;P92966-4;P92966-5;P92965;P92966;P92966-2	RS40;RS41	Serine/arginine-rich splicing factor RS40 (At-RSp40) (AtRS40);Serine/arginine-rich splicing factor RS41 (At-RSp41) (AtRS41)	0.90343	NaN	NaN	NaN	0.0270583	NaN	NaN	NaN	1	1	1	4.9	4.9	4.9	35.453	6.8067	3433500	1884700	1548800	NaN	NaN	NaN	NaN	NaN	NaN	NaN	NaN	NaN	NaN	NaN	NaN	NaN	NaN	NaN	NaN	NaN	0.829764	0.842096	1.03843
AT3G04260	F4J3M2	PTAC3	Plastid transcriptionally active 3	0.298752	NaN	NaN	NaN	0.0411383	NaN	NaN	NaN	1	1	1	1.4	1.4	1.4	102.92	24.384	4319800	2327100	1992700	NaN	NaN	NaN	NaN	NaN	0.146816	NaN	NaN	0.266484	NaN	NaN	NaN	NaN	NaN	NaN	0.262931	0.341477	0.341037	0.249565	NaN
AT5G62140	Q9FIS4	At5g62140	ATP-dependent Clp protease ATP-binding subunit (At5g62140)	0.287547	NaN	NaN	NaN	0.0411383	NaN	NaN	NaN	1	1	1	4.6	4.6	4.6	26.439	6.2549	2350000	1138400	1211600	NaN	NaN	NaN	NaN	NaN	NaN	NaN	NaN	NaN	NaN	NaN	NaN	NaN	NaN	NaN	0.295004	0.171772	0.294415	0.469147	0.207395
AT5G47890	Q9FIJ2		NADH dehydrogenase [ubiquinone] 1 alpha subcomplex subunit 2	0.609788	NaN	NaN	NaN	0.042917	NaN	NaN	NaN	1	1	1	14.4	14.4	14.4	10.851	3.2275	1854400	1035100	819350	NaN	NaN	NaN	NaN	NaN	NaN	0.278016	NaN	NaN	NaN	NaN	NaN	NaN	NaN	NaN	NaN	NaN	0.532902	0.820739	0.475723
AT2G23390	O80456	At2g23390	Acyl-CoA (At2g23390/F26B6.4)	0.468624	NaN	NaN	NaN	0.0499444	NaN	NaN	NaN	1	1	1	3.6	3.6	3.6	54.309	3.1371	1523500	800550	722980	NaN	NaN	NaN	NaN	NaN	NaN	NaN	NaN	NaN	NaN	-0.156858	NaN	NaN	NaN	NaN	0.382425	0.402601	0.620846	NaN	NaN
AT1G30380	Q9SUI5	PSAK	Photosystem I reaction center subunit psaK, chloroplastic (PSI-K) (Photosystem I subunit X)	-0.233528	-0.55415	-0.115159	-0.294477	0.0411383	0.0671179	0.461449	0.0685366	2	2	2	34.6	34.6	34.6	13.206	72.881	253890000	154380000	99508000	-0.42593	-0.472047	-0.573228	0.0262407	-0.0274229	-0.508807	-0.0447104	0.33418	-0.186343	-0.170113	NaN	NaN	-0.751032	-0.329918	-0.581501	-0.26635	-0.141264	-0.225576	-0.258061	-0.27639
AT5G35220	Q949Y5	EGY1	Probable zinc metalloprotease EGY1, chloroplastic (EC 3.4.24.-) (Protein AMMONIUM OVERLY SENSITIVE 1) (Protein ETHYLENE-DEPENDENT GRAVITROPISM-DEFICIENT AND YELLOW-GREEN 1) (AtEGY1)	0.283191	0.257833	0.05692	0.110234	0.0411383	0.259047	0.507626	0.282295	2	2	2	5.7	5.7	5.7	59.5	43.268	17883000	9451700	8431000	0.23484	-0.0316873	-0.0229552	NaN	0.260739	-0.166008	0.214196	0.0369493	0.0235845	0.175878	0.0975144	NaN	0.120353	0.555632	NaN	0.238452	0.187342	0.204988	0.44159	0.343582
AT1G54630	P25702	ACP3	Acyl carrier protein 3, chloroplastic (ACP-3)	-1.47636	-0.163524	NaN	NaN	0.0441666	0.5368	NaN	NaN	2	2	1	22.8	22.8	15.4	14.65	68.307	23041000	14807000	8233300	NaN	NaN	NaN	NaN	NaN	NaN	NaN	NaN	1.73896	NaN	0.00136822	NaN	0.0983742	NaN	-0.590313	NaN	-1.3304	NaN	-0.974872	-2.12381
AT1G08380	Q949Q5	PSAO	Photosystem I subunit O (PSI-O)	-0.673652	NaN	NaN	NaN	0.0499444	NaN	NaN	NaN	2	2	2	17.9	17.9	17.9	15.143	113.78	31239000	20718000	10522000	-0.0172229	NaN	NaN	NaN	NaN	NaN	NaN	NaN	NaN	NaN	-0.969726	NaN	NaN	NaN	NaN	NaN	-0.506492	-1.17932	-0.480648	-0.528147
AT4G15802	Q8GW48	HSBP	Heat shock factor-binding protein (AtHSBP)	-1.05578	0.0977658	NaN	-0.486503	0.0475345	0.37583	NaN	0.257597	3	3	3	53.5	53.5	53.5	9.3472	77.539	28660000	20317000	8342800	NaN	-0.206581	-1.32039	NaN	0.0674633	NaN	-0.566241	NaN	NaN	NaN	0.200683	0.143604	-0.0211857	0.0679618	NaN	-1.47275	-1.17039	0.0247345	-1.12072	-1.53976
AT1G06190	Q94K75-2;Q94K75	RHON1	Rho-N domain-containing protein 1, chloroplastic	0.395613	NaN	-0.143597	NaN	0.0478094	NaN	0.180114	NaN	3	3	3	13.1	13.1	13.1	32.265	7.8217	7848400	4093000	3755400	NaN	NaN	NaN	NaN	NaN	NaN	-0.225369	NaN	-0.0192739	-0.186147	NaN	NaN	NaN	NaN	NaN	0.0994374	0.57662	0.239281	0.558306	0.504422
AT2G32520	O80889	At2g32520	Alpha/beta-Hydrolases superfamily protein (At2g32520) (Putative carboxymethylenebutenolidase)	-0.372777	-0.160261	NaN	NaN	0.0315204	0.259047	NaN	NaN	3	3	3	17.6	17.6	17.6	25.921	7.5351	14079000	8335700	5742900	NaN	NaN	NaN	NaN	NaN	-0.452913	NaN	NaN	-0.486842	NaN	0.0406053	NaN	-0.179774	-0.340345	-0.161531	-0.380103	-0.413889	-0.397359	NaN	-0.299756
AT5G22580	Q9FK81		Stress-response A/B barrel domain-containing protein At5g22580 (Uncharacterized protein At5g22580)	-0.342732	-0.162454	NaN	NaN	0.0332718	0.534394	NaN	NaN	3	3	3	29.7	29.7	29.7	12.349	28.187	38377000	20900000	17477000	NaN	-0.597252	NaN	NaN	-0.777478	NaN	NaN	NaN	-0.81802	NaN	-0.134943	NaN	-0.244047	-0.623439	0.352611	-0.460053	-0.288765	-0.221424	-0.250303	-0.493117
AT3G44620	Q67YE7;F4J355	At3g44620	Protein-tyrosine phosphatase;Protein-tyrosine phosphatase (Protein-tyrosine-phosphatase-like protein)	-0.401521	NaN	NaN	NaN	0.0480042	NaN	NaN	NaN	3	3	3	22.2	22.2	22.2	26.95	35.238	10688000	5544700	5143300	NaN	NaN	NaN	NaN	NaN	NaN	NaN	NaN	NaN	NaN	NaN	NaN	NaN	NaN	NaN	NaN	-0.449283	-0.589001	-0.18881	-0.378989
AT2G39010	Q9ZV07	PIP2-6	6) (Plasma membrane intrinsic protein 2e) (PIP2e);Probable aquaporin PIP2-6 (Plasma membrane intrinsic protein 2-6) (AtPIP2	-0.277019	NaN	NaN	NaN	0.0499262	NaN	NaN	NaN	3	3	3	12.1	12.1	12.1	31.05	27.208	15410000	8906800	6503100	NaN	NaN	NaN	NaN	NaN	NaN	NaN	NaN	NaN	NaN	NaN	NaN	NaN	-0.421762	NaN	-0.183301	-0.479707	-0.307384	-0.149476	-0.265228
AT2G30930	O80858		Expressed protein	-0.326864	-0.351964	-0.135852	0.0887176	0.03165	0.087428	0.147123	0.58586	4	4	4	40.2	40.2	40.2	16.936	162.41	23835000	13206000	10629000	0.404843	0.167191	-0.312247	-0.171319	0.35512	NaN	-0.161784	-0.176086	0.0346428	-0.240181	-0.458008	NaN	-0.147263	-0.219771	-0.582814	-0.291832	-0.357136	-0.22081	-0.279694	-0.484847
AT3G59760	B9DFR6;Q43725;F4J9F7	OASC	Cysteine synthase, mitochondrial (EC 2.5.1.47) (Beta-substituted Ala synthase 2;2) (ARAth-Bsas2;2) (CSase C) (AtCS-C) (CS-C) (O-acetylserine (thiol)-lyase) (O-acetylserine sulfhydrylase) (OAS-TL C);Cysteine synthase (EC 2.5.1.47)	-2.31354	NaN	NaN	NaN	0.00299489	NaN	NaN	NaN	4	2	2	12.7	7.4	7.4	46.115	12.287	8181700	7640900	540780	NaN	NaN	NaN	NaN	NaN	NaN	NaN	NaN	NaN	NaN	NaN	NaN	NaN	NaN	NaN	NaN	NaN	-2.38863	-2.17408	-2.37792
AT3G59400	Q9LX31	GUN4	Tetrapyrrole-binding protein, chloroplastic (Genomes uncoupled 4)	0.369658	NaN	NaN	NaN	0.024238	NaN	NaN	NaN	4	4	4	19.2	19.2	19.2	29.665	19.246	24122000	13128000	10994000	NaN	NaN	NaN	NaN	NaN	NaN	0.381613	0.379795	NaN	NaN	0.368742	NaN	NaN	0.476828	NaN	0.407845	0.399834	0.278488	0.416456	0.345668
AT4G24800	Q8W4Q4	At4g24800	AT4g24800/F6I7_10 (MA3 domain-containing protein)	-0.422516	NaN	NaN	NaN	0.0297237	NaN	NaN	NaN	4	4	4	9.3	9.3	9.3	77.435	16.295	12003000	7340100	4663000	NaN	-0.774525	NaN	NaN	-0.781207	NaN	NaN	-0.077799	NaN	0.0370728	-0.483746	NaN	NaN	0.0815005	NaN	-0.375359	-0.523997	-0.588432	-0.287017	-0.337773
AT3G11170	P46310	FAD7	sn-2 acyl-lipid omega-3 desaturase (ferredoxin), chloroplastic (EC 1.14.19.35) (Omega-3 fatty acid desaturase 7, chloroplastic)	0.33766	NaN	NaN	NaN	0.0332718	NaN	NaN	NaN	4	4	3	12.1	12.1	8.7	51.174	9.6618	10093000	4947300	5146100	NaN	NaN	NaN	NaN	NaN	NaN	NaN	NaN	NaN	NaN	NaN	NaN	NaN	0.458015	NaN	0.364295	0.176418	0.31176	0.513306	0.322523
ATCG00750	P56802	rps11	30S ribosomal protein S11, chloroplastic	0.311133	0.0681117	0.0748634	0.0114988	0.0322991	0.536647	0.231267	0.871271	5	5	5	47.8	47.8	47.8	15.023	112.39	172930000	89370000	83560000	-0.125664	0.114558	-0.0776506	0.092368	0.0538826	0.073855	0.0923766	0.200658	-0.0042159	0.0116434	0.0588811	-0.0844505	0.0169127	0.319678	0.0295373	0.411459	0.323182	0.235231	0.389092	0.196699
AT1G04430	Q940J9		Probable methyltransferase PMT8 (EC 2.1.1.-)	-0.285529	NaN	-0.434207	NaN	0.0378531	NaN	0.121696	NaN	5	5	3	10	10	6.6	70.507	16.771	17772000	10192000	7579700	-0.403864	NaN	NaN	NaN	NaN	-0.697663	-0.556368	0.394416	-0.421048	-0.890372	-0.0998951	NaN	NaN	-0.41993	NaN	-0.376004	-0.280677	-0.364159	-0.26894	-0.137866
AT3G16140	Q9SUI7	PSAH1	Photosystem I reaction center subunit VI-1, chloroplastic (PSI-H1)	-1.95044	-1.52407	NaN	NaN	0.0411383	0.192628	NaN	NaN	5	2	2	49	17.9	17.9	15.216	131.02	22207000	16547000	5660200	-1.78936	NaN	NaN	NaN	NaN	NaN	NaN	NaN	NaN	NaN	-1.84744	0.0754467	-2.80022	NaN	NaN	-2.34842	-1.68185	-0.512544	-1.75814	-3.45124
AT1G07110	Q9MB58	FKFBP	6-phosphofructo-2-kinase/fructose-2,6-bisphosphatase (6PF-2-K/Fru-2,6-P2ase) (AtF2KP) (PFK/FBPase) [Includes: 6-phosphofructo-2-kinase (EC 2.7.1.105);Fructose-2,6-bisphosphatase (EC 3.1.3.46)]	0.473555	NaN	NaN	NaN	0.03066	NaN	NaN	NaN	5	5	5	9.9	9.9	9.9	82.558	19.388	5317600	2859600	2458000	NaN	NaN	NaN	NaN	NaN	NaN	NaN	NaN	NaN	NaN	0.23402	NaN	NaN	NaN	NaN	NaN	0.574168	0.569857	0.366102	0.384093
AT1G74070	F4HTT6	CYP26-2	Peptidyl-prolyl cis-trans isomerase CYP26-2, chloroplastic (PPIase CYP26-2) (EC 5.2.1.8) (Cyclophilin of 26 kDa 2) (Cyclophilin-26-2)	0.434611	0.168121	NaN	-0.0483247	0.0488868	0.259796	NaN	0.446082	6	6	6	25.9	25.9	25.9	34.374	13.089	15007000	7840000	7166500	-0.000284612	-0.128376	NaN	-0.0362941	-0.0283442	NaN	NaN	NaN	NaN	NaN	0.401949	0.190791	NaN	0.0305519	0.0491936	NaN	NaN	0.389092	0.363719	0.551021
AT5G35100	O65220;O65220-2	CYP28	Peptidyl-prolyl cis-trans isomerase CYP28, chloroplastic (PPIase CYP28) (EC 5.2.1.8) (Cyclophilin of 28 kDa) (Cyclophilin-28)	0.650356	0.152767	NaN	NaN	0.03066	0.414035	NaN	NaN	6	6	6	29.5	29.5	29.5	30.504	58.934	11691000	6018600	5672300	-0.179417	NaN	NaN	NaN	NaN	NaN	0.22943	NaN	NaN	NaN	-0.0300134	0.0657281	NaN	0.525295	0.0500602	NaN	0.898207	0.683892	0.463204	0.556121
AT1G44575	Q9XF91;F4IEG8	PSBS;NPQ4	Photosystem II 22 kDa protein, chloroplastic (CP22) (Protein NONPHOTOCHEMICAL QUENCHING 4) (Protein PHOTOSYSTEM II SUBUNIT S);Chlorophyll A-B binding family protein	0.238081	0.45049	0.117962	0.116194	0.0388723	0.211837	0.229694	0.0927513	7	7	7	30.2	30.2	30.2	28.007	303.84	905110000	457760000	447350000	0.135737	0.137114	-0.0193778	0.225327	0.10217	-0.0124709	0.148746	0.0855109	-0.0182807	0.386303	0.407928	1.32497	-0.0751996	0.539152	0.0556017	0.195937	0.196797	0.210689	0.272355	0.314628
AT1G08550	Q39249	VDE1	Violaxanthin de-epoxidase, chloroplastic (AtVxDE) (EC 1.23.5.1) (Protein NON-PHOTOCHEMICAL QUENCHING 1)	0.308179	0.0170248	NaN	0.089479	0.0478094	0.876711	NaN	0.221407	7	7	7	21.2	21.2	21.2	52.017	60.321	27870000	13069000	14802000	-0.0038144	0.0907888	NaN	0.199007	0.0719345	0.114457	NaN	NaN	0.0636254	NaN	-0.11598	-0.0790647	0.140788	0.134964	0.00441656	0.463857	0.403802	0.0839265	0.347305	0.242005
AT2G20610	Q9SIV0;Q9SIV0-2	SUR1	S-alkyl-thiohydroximate lyase SUR1 (EC 4.4.1.-) (Protein ABERRANT LATERAL ROOT FORMATION 1) (Protein HOOKLESS 3) (Protein ROOTY) (Protein ROOTY 1) (Protein SUPERROOT 1)	-0.39594	-0.299792	NaN	NaN	0.0322991	0.144494	NaN	NaN	7	7	7	23.8	23.8	23.8	51.087	24.569	21588000	13957000	7631400	NaN	NaN	NaN	NaN	-0.424336	NaN	NaN	NaN	NaN	NaN	-0.725985	-0.294062	-0.00886825	-0.34396	-0.126085	-0.30872	-0.500367	-0.592596	-0.219966	-0.35805
AT1G53280	Q9MAH3	DJ1B	Protein DJ-1 homolog B (AtDJ1B)	0.560861	NaN	NaN	NaN	0.0332718	NaN	NaN	NaN	7	7	7	26.5	26.5	26.5	46.99	62.316	13123000	6500300	6622200	NaN	NaN	NaN	-0.0696318	NaN	NaN	NaN	NaN	NaN	NaN	NaN	NaN	NaN	-0.0107436	NaN	NaN	NaN	0.503941	0.518043	0.6606
AT3G26450	Q9LIN0	At3g26450	Major latex protein, putative (Major latex protein-like) (Polyketide cyclase/dehydrase and lipid transport superfamily protein) (Putative major latex protein)	0.253276	0.161197	0.0190249	-0.0060584	0.0370935	0.290101	0.759558	0.913847	8	7	4	73	68.4	50	17.791	207.54	92766000	52763000	40002000	0.0966327	-0.0250404	0.0224287	-0.0535943	-0.0707187	0.00116412	0.00966096	-0.0828716	-0.00724584	0.174417	0.0683184	-0.112199	0.238946	0.469471	0.141451	0.245511	0.275288	0.202844	0.35134	0.191397
AT1G53500;AT3G14790	Q9LH76;Q9LPG6	RHM3;RHM2	Trifunctional UDP-glucose 4,6-dehydratase/UDP-4-keto-6-deoxy-D-glucose 3,5-epimerase/UDP-4-keto-L-rhamnose-reductase RHM2 (NDP-rhamnose synthase) (Protein MUCILAGE-MODIFIED 4) (Protein RHAMNOSE BIOSYNTHESIS 2) (Rhamnose biosynthetic enzyme 2) (AtRHM2) (UDP-L-rhamnose synthase MUM4) [Includes: UDP-glucose 4,6-dehydratase (EC 4.2.1.76);Trifunctional UDP-glucose 4,6-dehydratase/UDP-4-keto-6-deoxy-D-…	-0.337836	NaN	NaN	NaN	0.0351394	NaN	NaN	NaN	8	2	2	16.4	4.7	4.7	74.913	3.5087	11034000	6189300	4845100	NaN	NaN	NaN	NaN	NaN	NaN	NaN	NaN	NaN	NaN	NaN	NaN	NaN	NaN	NaN	-0.305475	-0.333203	-0.422467	-0.290201	NaN
AT1G77510	Q9SRG3	PDIL1-2	Protein disulfide isomerase-like 1-2 (AtPDIL1-2) (EC 5.3.4.1) (Protein disulfide-isomerase 2) (PDI 2) (Protein disulfide-isomerase 6) (AtPDI6)	-0.492472	-0.463246	NaN	NaN	0.0315204	0.10225	NaN	NaN	9	6	6	26.4	19.3	19.3	56.364	13.427	9809800	6393600	3416200	NaN	NaN	NaN	NaN	NaN	NaN	NaN	NaN	-0.830648	NaN	-0.748058	NaN	-0.357836	-0.283845	NaN	-0.259911	-0.549322	-0.392597	-0.784545	-0.475983
AT2G35410	O82299		Putative chloroplast RNA binding protein (RNA-binding (RRM/RBD/RNP motifs) family protein)	0.210862	-0.0113589	0.00516598	0.110652	0.0441666	0.906091	0.962369	0.0679142	10	10	10	39	39	39	33.785	163.6	114330000	58587000	55745000	0.101048	0.140701	0.0164209	0.153679	0.141413	-0.325178	0.184813	0.16745	-0.0584916	0.0572365	0.0408939	0.0671967	-0.199805	0.0181803	0.0167395	0.265358	0.18245	0.265948	0.169861	0.170691
AT1G76080	Q9SGS4	CDSP32	Thioredoxin-like protein CDSP32, chloroplastic (Chloroplastic drought-induced stress protein of 32 KDa) (AtCDSP32)	0.273655	0.164829	0.0686655	0.0266354	0.03066	0.170964	0.320148	0.79298	11	11	11	39.7	39.7	39.7	33.684	74.545	276760000	140770000	135990000	-0.0371228	0.209719	-0.248576	0.138248	0.070909	0.12441	0.193491	0.06374	0.0459148	-0.0842285	0.27889	0.292579	0.136163	-0.0305633	0.147076	0.276016	0.324579	0.275092	0.231252	0.261335
AT3G19450	P48523	CAD4	Cinnamyl alcohol dehydrogenase 4 (AtCAD4) (EC 1.1.1.195) (Cinnamyl alcohol dehydrogenase C)	0.22971	0.14533	0.335823	NaN	0.0411383	0.534394	0.169453	NaN	11	11	11	45.5	45.5	45.5	39.098	29.896	26785000	13694000	13091000	NaN	NaN	NaN	NaN	NaN	0.260619	0.0245428	NaN	0.924594	0.133535	0.495464	-0.113862	NaN	0.0543874	NaN	0.257349	0.203435	0.314145	0.149579	0.22404
AT3G62870	Q9LZH9	RPL7AB	60S ribosomal protein L7a-2	0.399629	NaN	NaN	NaN	0.0478094	NaN	NaN	NaN	11	2	2	44.9	7.4	7.4	29.034	4.0927	22843000	10802000	12041000	NaN	NaN	NaN	NaN	NaN	NaN	NaN	NaN	0.30889	NaN	NaN	NaN	NaN	NaN	NaN	NaN	0.328379	0.435356	0.435153	NaN
AT4G14040	Q93WN0	SBP2	Selenium-binding protein 2 (Protein EMBRYO SAC DEVELOPMENT ARREST 38)	-0.373877	-0.351069	0.0484005	-0.238178	0.024238	0.0936184	0.759082	0.0819462	13	7	7	36.3	24.6	24.6	53.937	92.24	29225000	16995000	12230000	-0.574601	-0.140533	-0.120764	0.0110408	-0.366035	0.327865	NaN	NaN	0.000403583	-0.183067	-0.399492	-0.316956	-0.761463	-0.166509	-0.110927	-0.343992	-0.452105	-0.405535	-0.301116	-0.366636
AT3G23940	Q9LIR4-2;Q9LIR4	DHAD	Dihydroxy-acid dehydratase, chloroplastic (AtDHAD) (DAD) (EC 4.2.1.9)	0.257986	-0.00211667	0.195662	-0.247653	0.0315204	0.993834	0.421585	0.0583003	14	14	14	31.2	31.2	31.2	64.713	87.284	56310000	31997000	24313000	-0.0400234	NaN	-0.16417	-0.394346	-0.392072	NaN	-0.0556249	0.842871	0.113962	-0.11856	0.176574	NaN	0.25733	NaN	-0.440254	0.277855	0.295233	0.268	0.227366	0.221474
AT2G21390	Q9SJT9		Coatomer subunit alpha-2 (Alpha-coat protein 2) (Alpha-COP 2)	-0.235319	0.100352	0.0179082	0.0265781	0.0418482	0.536354	0.739144	0.852174	22	22	10	25.6	25.6	13.7	136.47	108.44	77757000	40932000	36825000	-0.214754	NaN	0.225003	NaN	0.0694853	-0.0257074	0.121756	-0.0381752	0.0364433	-0.00477545	-0.189118	NaN	0.0759282	0.158668	0.355928	-0.149251	-0.194369	-0.315412	-0.216056	-0.301506
AT1G50250	Q39102	FTSH1	ATP-dependent zinc metalloprotease FTSH 1, chloroplastic (AtFTSH1) (EC 3.4.24.-)	0.380923	0.185513	-0.00735682	0.0996178	0.03066	0.368499	0.929275	0.146049	24	6	6	47.3	14.4	14.4	76.758	73.135	66285000	34412000	31873000	0.168034	0.0893616	-0.0512935	0.0985038	0.193483	-0.0755338	-0.189841	-0.00784662	0.0203093	0.216128	0.569348	NaN	-0.104856	0.191604	0.0859549	0.316088	0.346734	0.333871	0.323362	0.58456
AT4G24280	Q9STW6	HSP70-6	Heat shock 70 kDa protein 6, chloroplastic (Chloroplast heat shock protein 70-1) (cpHsc70-1) (Heat shock protein 70-6) (AtHsp70-6)	0.218412	0.137944	0.019406	-0.0321227	0.0497547	0.172252	0.739144	0.772519	32	11	11	52.9	21.9	21.9	76.507	304.28	426250000	216240000	210010000	-0.0187302	0.080337	-0.383425	0.0810268	0.0801779	-0.01209	0.0592243	-0.00806022	0.131458	-0.0735022	0.184738	0.131913	0.194335	-0.0194471	0.198181	0.116031	0.287835	0.270049	0.166305	0.251839
AT2G26080	O80988	GLDP2	Glycine dehydrogenase (decarboxylating) 2, mitochondrial (EC 1.4.4.2) (Glycine cleavage system P protein 2) (Glycine decarboxylase 2) (Glycine decarboxylase P-protein 2) (AtGLDP2) (Glycine dehydrogenase (aminomethyl-transferring) 2)	0.199998	0.0862678	0.0982935	0.0602218	0.0450224	0.29919	0.342174	0.313295	38	20	20	58	33.1	33.1	113.77	323.31	328300000	171940000	156360000	-0.0556161	0.0696353	0.0474177	0.15956	0.0801121	0.392595	0.0257792	0.0959845	-0.110961	0.0880698	0.189735	0.0982207	0.0134664	0.0590005	0.0709164	0.249151	0.179367	0.166212	0.225138	0.180124
AT5G19860	Q7XA63	At5g19860	At5g19860	NaN	0.207544	0.353126	0.301994	NaN	0.215217	0.00588982	0.00305361	1	1	1	12.2	12.2	12.2	20.443	66.532	14171000	7325900	6845300	0.322974	0.247833	0.345333	0.306586	0.287242	NaN	0.35969	0.381019	0.385038	0.286758	0.037443	NaN	0.473513	0.235996	0.0832253	NaN	NaN	NaN	NaN	0.307542
AT3G48140	Q42338	T24C20_20	AT3G48140 protein (B12D protein) (B12D-like protein) (HVB12D homologue)	-0.511615	NaN	-0.247612	-0.218026	0.0895679	NaN	0.035572	0.0152247	1	1	1	14.8	14.8	14.8	10.019	24.776	23474000	13761000	9713200	-0.24093	-0.225888	NaN	-0.212731	-0.192556	-0.259539	-0.385674	-0.102372	NaN	-0.242865	NaN	NaN	NaN	0.148674	NaN	-0.730967	NaN	-0.069615	-0.381443	-0.864436
AT5G03100	Q501G5		F-box protein At5g03100	-0.36624	-0.207355	-0.269791	-0.253437	0.0658148	0.173906	0.0171254	0.00702272	1	1	1	2.3	2.3	2.3	34.836	22.869	566710000	313910000	252800000	-0.260886	-0.2258	-0.189788	-0.24818	-0.34253	-0.162569	-0.285854	-0.277071	-0.35367	NaN	-0.277112	NaN	NaN	-0.226699	-0.118254	NaN	-0.412979	NaN	-0.235686	-0.450054
AT5G16150	Q56ZZ7		Plastidic glucose transporter 4 (AtpGlcT)	NaN	0.692955	-0.340336	-0.40251	NaN	0.215217	0.0221227	0.0102064	1	1	1	2.4	2.4	2.4	56.969	20.043	15267000	8221300	7045300	-0.283758	-0.393435	-0.343361	NaN	-0.589488	NaN	-0.388865	-0.377703	-0.254441	NaN	0.186	NaN	0.199827	1.85454	0.531454	NaN	NaN	NaN	NaN	-0.0024009
AT5G42070	Q8RWR9	At5g42070	Uncharacterized protein At5g42070	0.293961	NaN	0.522659	0.491337	0.182498	NaN	0.00226193	0.0027084	2	2	2	18.3	18.3	18.3	17.681	51.829	23689000	12521000	11168000	0.485821	0.470299	NaN	0.431326	0.577901	0.391515	0.593026	0.543615	0.573408	0.511729	0.20441	NaN	NaN	NaN	-0.122264	0.547168	-0.233577	0.161215	0.47189	0.523109
AT1G08880;AT1G54690;AT3G20670	Q9S9K7;O04848;Q9LHQ5		Probable histone H2A.2 (HTA13);Probable histone H2AXa (HTA5);Probable histone H2AXb (HTA3)	-0.308351	-0.358907	-0.352616	-0.292745	0.215586	0.112304	0.0162463	0.00973044	2	2	1	14.8	14.8	8.5	14.783	17.238	92125000	54721000	37403000	NaN	-0.276074	-0.221749	-0.318833	-0.354324	-0.402803	NaN	-0.334424	NaN	-0.320622	-0.291533	NaN	-0.223257	NaN	-0.56193	NaN	0.00325297	-0.0496792	-0.471363	-0.715613
AT3G16910	Q8VZF1	AAE7	Acetate/butyrate--CoA ligase AAE7, peroxisomal (EC 6.2.1.1) (EC 6.2.1.2) (AMP-binding protein 7) (AtAMPBP7) (Acetyl-CoA synthetase) (Acyl-activating enzyme 7) (Butyryl-CoA synthetase) (Protein ACETATE NON-UTILIZING 1)	NaN	0.580383	0.805109	0.833415	NaN	0.0613497	0.00352079	0.00228269	3	3	3	7.2	7.2	7.2	62.956	4.2001	8827900	4101300	4726500	0.852313	NaN	0.81851	NaN	0.829421	0.789597	0.869561	NaN	NaN	0.756169	0.603724	NaN	0.471872	0.272203	0.973732	NaN	NaN	NaN	NaN	NaN
AT2G04700	Q9SJ89	FTRC	Ferredoxin-thioredoxin reductase catalytic chain, chloroplastic (FTR-C) (EC 1.8.7.2) (Ferredoxin-thioredoxin reductase subunit B) (FTR-B)	0.115896	NaN	0.716594	0.793302	0.511884	NaN	0.00305176	0.0027084	3	3	3	18.5	18.5	18.5	16.434	58.345	70193000	35660000	34533000	0.437187	0.940734	0.890344	0.993154	0.70509	0.53723	0.53921	0.800604	0.711405	0.99452	0.105753	-0.125849	NaN	NaN	NaN	0.310154	-0.381969	0.111478	0.223615	0.316201
AT1G17050	Q76FS5	SPS2	Solanesyl diphosphate synthase 2, chloroplastic (AtSPS2) (EC 2.5.1.85) (All-trans-nonaprenyl-diphosphate synthase 2 (geranylgeranyl-diphosphate specific))	0.398573	0.412582	0.469116	0.476461	0.0892357	0.0571585	0.00827714	0.0070938	3	3	3	15.1	15.1	15.1	46.044	114.74	11411000	5269200	6141900	NaN	0.505077	0.476696	NaN	0.44761	0.446829	NaN	0.470879	0.489639	NaN	0.36708	NaN	NaN	0.420355	0.45031	NaN	0.496574	0.705454	0.303167	0.0890961
AT1G50450	Q94BZ0	At1g50450	At1g50450/F11F12_20 (Saccharopine dehydrogenase)	0.257514	-0.284752	-0.439571	-0.36357	0.559633	0.239572	0.0292582	0.00868522	3	3	3	13.6	13.6	13.6	46.559	22.212	21779000	10998000	10781000	-0.211556	-0.226884	-0.547209	-0.385537	-0.446665	-0.123024	-0.310654	-0.414135	-0.46378	-0.886262	-0.738753	NaN	-0.264916	0.0313063	-0.166647	-0.134159	-0.515116	NaN	1.06701	0.612323
AT3G56490	Q8GUN2	HIT3	Adenylylsulfatase HINT1 (EC 3.6.2.1) (HIS triad family protein 3) (Histidine triad nucleotide-binding protein 1)	-0.121536	-0.178439	-0.486473	-0.461139	0.308789	0.290292	0.00305176	0.0019144	3	3	3	29.9	29.9	29.9	16	60.963	47981000	27340000	20641000	-0.419181	-0.475465	-0.470811	-0.403613	-0.536624	-0.425113	-0.591525	-0.488614	-0.368632	-0.558479	-0.234228	-0.0422768	0.177614	-0.404826	-0.388479	-0.23965	-0.23453	-0.24976	0.0758668	0.0403912
AT5G47700	Q8LEQ0	RPP1C	60S acidic ribosomal protein P1-3	-0.721711	0.219151	-0.288125	-0.636079	0.0895679	0.719508	0.0063168	0.0251969	3	2	2	72.6	49.6	49.6	11.247	125.03	49385000	31967000	17418000	-0.799767	-0.82079	NaN	NaN	-0.287679	-0.301845	-0.408922	-0.276042	-0.22921	-0.224606	-1.11992	0.246889	1.53596	-0.173641	0.606469	-1.57018	-0.246654	-0.0883067	-1.00438	-0.699034
AT4G32470	Q9SUU5	QCR7-1	Cytochrome b-c1 complex subunit 7-1 (Complex III subunit VII)	-0.491985	0.151404	1.6826	1.9942	0.0820295	0.460987	0.00485346	0.015049	4	4	2	38.5	38.5	18.9	14.527	48.968	66941000	27945000	38997000	1.77235	2.73763	0.700501	NaN	2.76632	1.37328	2.68076	1.29178	1.79027	1.27689	0.0540439	0.116391	-0.222522	0.112594	0.696513	-0.455392	-0.327391	0.0328833	-0.924434	-0.78559
ATCG00820	P56808	rps19	30S ribosomal protein S19, chloroplastic	-0.203667	NaN	0.913308	0.99642	0.613218	NaN	0.000871276	0.000582552	4	4	4	57.6	57.6	57.6	10.608	22.053	189650000	94127000	95521000	1.17257	0.922495	1.0406	0.855099	0.991337	0.708901	0.93124	1.09863	0.909733	0.918037	0.664401	NaN	NaN	0.64139	NaN	-0.010409	0.238867	0.152237	0.037999	-1.43703
AT1G79850	P16180	RPS17	30S ribosomal protein S17, chloroplastic (CS17)	0.207435	0.133775	0.17367	0.285714	0.343177	0.361495	0.0402814	0.0051176	4	4	4	32.9	32.9	32.9	16.282	114.05	216780000	111260000	105520000	0.230013	0.376751	0.222161	0.274176	0.325469	0.123168	0.0755791	0.270102	0.116766	0.282737	0.275487	-0.106543	0.334678	0.246592	-0.0813391	0.313607	-0.375237	0.139575	0.565287	0.393943
AT3G44320	P46010	NIT3	Nitrilase 3 (EC 3.5.5.1)	-0.193008	-0.257164	-0.207063	-0.182019	0.103568	0.142142	0.0178846	0.0163699	4	1	1	16.2	5.5	5.5	38.022	323.31	132890000	78222000	54667000	-0.100682	-0.261613	-0.179887	-0.193532	-0.174379	-0.120318	-0.199747	-0.259777	-0.145031	-0.310443	-0.470317	-0.463692	0.0173099	-0.0744636	-0.294659	-0.19101	-0.33669	-0.0661812	-0.318935	-0.0522218
AT1G07790;AT2G28720;AT3G45980;AT3G46030;AT5G02570;AT5G22880;AT5G59910	Q9FFC0;Q9LZT0;Q9LQQ4;P40283;O23629;Q9SI96;Q9LZ45	H2B	Histone H2B.1 (HTB1);Histone H2B.10 (HTB2);Histone H2B.11 (HTB4);Histone H2B.3 (HTB3);Histone H2B.6 (H2BAt) (HTB9);Histone H2B.7 (HTB11);Histone H2B.9 (HTB10)	-0.277088	-0.282217	-0.25932	-0.225948	0.197628	0.202626	0.0108504	0.00774943	4	4	2	32.4	32.4	15.9	15.732	75.087	279770000	159700000	120070000	-0.247751	-0.183347	-0.191121	-0.278074	-0.229448	-0.413223	-0.214159	-0.241243	-0.236393	-0.191582	-0.11373	-0.0817552	-0.222913	-0.144341	-0.848347	-0.221347	-0.314058	-0.0532959	0.0174227	-0.814161
AT5G15970	P31169	KIN2	Stress-induced protein KIN2 (Cold-induced protein COR6.6)	-0.826084	-0.7971	-0.317933	-0.44129	0.0941234	0.315057	0.0274982	0.0356413	4	4	4	71.2	71.2	71.2	6.5512	41.177	58788000	37397000	21391000	-0.987206	-0.194674	-0.510168	-0.17603	-0.338371	-0.630731	-0.172981	-0.255628	-0.354137	-0.176188	NaN	NaN	-0.446619	0.100639	-2.04532	-1.01548	NaN	0.0242975	-0.835802	-1.47735
AT4G16660	F4JMJ1	HSP70-17	Heat shock 70 kDa protein 17 (Heat shock protein 70-17) (AtHsp70-17)	-0.141145	-0.0858228	-0.403736	-0.689004	0.112815	0.513772	0.00851755	0.00444952	4	4	4	8.4	8.4	8.4	96.724	59.111	20113000	12117000	7995400	-0.744876	-0.295949	-0.692708	-0.94762	-0.763869	NaN	-0.397201	-0.520867	-0.433169	-0.263707	-0.130441	NaN	-0.163885	0.0368577	NaN	-0.0314201	-0.204767	-0.106411	-0.189032	-0.174093
AT5G10920	Q9LEU8		Argininosuccinate lyase, chloroplastic (EC 4.3.2.1) (Arginosuccinase)	0.284904	0.113057	0.460531	0.590262	0.315064	0.300563	0.00305176	0.0422097	5	5	5	15.3	15.3	15.3	57.512	27.344	24624000	12678000	11946000	1.20408	NaN	0.438255	0.467609	0.251104	0.506651	0.285964	0.516519	0.517972	0.47555	0.142032	NaN	-0.00053601	0.0881683	0.222564	0.264788	1.08067	-0.094445	0.140657	0.0328497
ATCG00650	P56807	rps18	30S ribosomal protein S18, chloroplastic	-0.243299	-0.254829	0.193751	0.336672	0.43278	0.626504	0.0463559	0.0115219	5	5	5	35.6	35.6	35.6	12.06	21.529	120780000	63795000	56987000	0.391269	0.211294	0.419348	0.154912	0.506539	0.0668252	0.152198	0.289454	0.356931	0.103349	0.956214	0.00586006	-0.503725	-0.219906	-1.51259	-0.108575	-0.171968	-0.0966964	0.286226	-1.12548
AT3G10940	Q9SRK5	LSF2	Phosphoglucan phosphatase LSF2, chloroplastic (EC 3.1.3.-) (Phosphoglucan phosphatase like sex Four2) (Protein LIKE SEX4 2)	0.0100785	NaN	0.232876	0.208225	0.938232	NaN	0.0412217	0.0289768	5	5	5	24.8	24.8	24.8	32.087	22.192	19058000	10061000	8997000	0.23061	0.310305	0.310108	0.0149238	0.175176	0.22282	NaN	0.177661	0.134141	0.396882	-0.10085	NaN	NaN	-0.0924499	NaN	-0.195086	-0.161571	0.0938479	0.221005	0.0921966
AT1G21720;AT1G77440	Q9XI05;Q9XI05-2;O81153	PBC1;PBC2	Proteasome subunit beta type-3-A (EC 3.4.25.1) (20S proteasome beta subunit C-1) (Proteasome component T);Proteasome subunit beta type-3-B (EC 3.4.25.1) (20S proteasome beta subunit C-2)	-0.276855	-0.204104	-0.174339	-0.200507	0.197628	0.184898	0.0448454	0.0366064	5	5	5	36.8	36.8	36.8	22.798	63.141	51409000	30210000	21199000	-0.0271831	-0.354493	-0.290825	-0.132782	-0.197251	-0.0600286	-0.218699	-0.182541	-0.317935	-0.0924913	-0.127555	NaN	-0.294364	-0.379313	-0.0151839	-0.790982	-0.283477	-0.319843	-0.033905	0.0439332
AT5G09510	Q9FY64;A8MQ96	RPS15D;At5g09510	40S ribosomal protein S15-4;Ribosomal protein S19 family protein	-0.164382	-0.159517	-0.22871	-0.21298	0.342532	0.272393	0.00839616	0.022332	5	5	1	58.6	58.6	7.9	17.072	253.71	303600000	170510000	133100000	-0.226156	-0.0651666	-0.18648	-0.36064	-0.226456	-0.279495	-0.254863	-0.242039	-0.212609	-0.154545	-0.238152	-0.0129203	-0.224633	0.0968787	-0.418759	-0.292042	-0.229529	0.0533655	0.166023	-0.519729
AT3G05560	Q9M9W1	RPL22B	60S ribosomal protein L22-2	-0.201876	NaN	-0.269747	-0.273308	0.208031	NaN	0.0263565	0.0232623	5	5	2	48.4	48.4	20.2	14.018	58.092	160740000	93502000	67238000	-0.0318981	-0.346764	-0.414723	-0.193933	-0.379221	-0.458893	-0.246335	-0.194303	-0.374875	-0.0743271	0.407058	NaN	NaN	NaN	-0.272158	-0.220368	-0.567428	-0.211764	0.0422403	-0.0520626
AT3G22230	Q8LCL3	RPL27B	60S ribosomal protein L27-2	-0.133305	-0.440615	-0.43346	-0.28115	0.194739	0.152504	0.00681268	0.0376828	5	5	2	34.1	34.1	14.1	15.614	14.755	189960000	109770000	80192000	-0.285598	-0.348697	-0.047879	-0.442427	NaN	-0.560533	-0.432139	-0.373591	-0.592237	-0.208801	-0.213541	NaN	-0.304833	NaN	-0.803472	-0.125849	-0.286594	-0.11236	0.0413883	-0.183109
AT2G32060	Q9SKZ3	RPS12C	40S ribosomal protein S12-2	-0.223221	-0.0632932	-0.296422	-0.290293	0.0993671	0.740826	0.0300187	0.0134013	5	3	3	58.3	45.8	45.8	15.329	107.82	82804000	50070000	32734000	-0.386961	-0.381808	-0.36471	-0.234341	-0.0836444	-0.462141	-0.377429	-0.418127	-0.193755	-0.0306599	-0.437783	NaN	0.0244395	0.077927	0.0822436	-0.148054	-0.506514	-0.182607	-0.0893795	-0.189552
AT1G48420	F4HYF3-2;F4HYF3	DCD	Bifunctional D-cysteine desulfhydrase/1-aminocyclopropane-1-carboxylate deaminase, mitochondrial (EC 3.5.99.7) (EC 4.4.1.15) (1-aminocyclopropane-1-carboxylic acid deaminase 1) (AtACD1) (AtD-CDes1) (D-CDes1) (D-CDES)	NaN	-0.305444	-0.442802	-0.351483	NaN	0.0809289	0.00899923	0.00279385	5	5	4	19.4	19.4	15.7	41.688	42.918	14902000	8674700	6227200	-0.258344	-0.393195	-0.308203	-0.382334	-0.415339	NaN	-0.46247	-0.44728	-0.418656	NaN	-0.291533	NaN	-0.256491	-0.519632	-0.154118	NaN	-0.229883	NaN	NaN	NaN
AT1G52230	Q9SUI6	PSAH2	Photosystem I reaction center subunit VI-2, chloroplastic (PSI-H1)	-1.14789	-0.865777	-1.21912	-0.67871	0.0658148	0.173265	0.00305176	0.0338077	5	5	2	49	49	17.9	15.273	323.31	882720000	552790000	329930000	-0.316536	-0.91344	-0.443405	-0.24487	-1.4753	-1.456	-0.85177	-1.10019	-1.00466	-1.68297	-0.255294	0.171307	-1.08162	-0.841919	-2.32136	-2.16049	-0.588438	-0.135319	-1.06619	-1.78903
AT5G17170	Q9FFJ2;A8MSF2	ENH1	Rubredoxin family protein	0.302999	0.394247	0.417581	0.40659	0.135128	0.109855	0.00226193	0.00226972	6	6	6	39.1	39.1	39.1	28.458	223.52	134360000	65996000	68359000	0.43869	0.360631	0.33443	0.500848	0.398353	0.425075	0.463123	0.356615	0.435091	0.408	0.457894	NaN	0.0951174	0.73524	0.288736	0.585831	0.558397	0.27373	-0.131271	0.228306
AT1G67700	Q8LDL0-3;Q8LDL0-2;Q8LDL0	HHL1	Protein HHL1, chloroplastic (Hypersensitive to high light 1)	-0.0915458	0.0994803	0.154071	0.19937	0.408485	0.217584	0.0324559	0.0182462	6	6	6	31.4	31.4	31.4	25.911	182.22	202540000	112470000	90067000	0.19238	0.337251	0.152378	0.182847	0.131992	0.249939	0.143819	0.0922361	0.168344	0.116015	0.107545	0.154071	0.106982	0.0877694	0.0410343	-0.29791	0.0581762	-0.0244291	0.0129631	-0.206529
AT1G78630	Q9SYL9	RPL13	50S ribosomal protein L13, chloroplastic (CL13) (Protein EMBRYO DEFECTIVE 1473)	-0.00088558	0.128485	-0.225564	-0.206287	0.997463	0.529579	0.0291445	0.0436826	6	6	6	40.7	40.7	40.7	26.788	134.62	228230000	125670000	102560000	-0.105314	-0.112177	-0.167977	-0.458049	-0.187916	-0.255024	-0.330652	-0.0811287	-0.348081	-0.112934	0.170901	0.0904943	-0.259807	-0.00954047	0.650377	0.122297	0.22126	0.409438	0.0848531	-0.842276
AT1G66240	Q94BT9;Q94BT9-2	ATX1	Copper transport protein ATX1 (Copper chaperone ATX1)	-0.139398	-0.227333	-0.408452	-0.410483	0.446186	0.168344	0.00485346	0.00845304	6	6	6	77.6	77.6	77.6	8.1584	68.702	69492000	40436000	29056000	-0.261621	-0.569211	-0.58418	-0.397938	-0.239467	-0.314707	-0.433554	-0.275249	-0.449771	-0.568977	-0.301092	NaN	-0.195641	-0.00831899	-0.404281	0.0936815	-0.405406	-0.205658	-0.419482	0.239877
AT1G09180;AT4G02080	O04834;O80489	SAR1A;T12M4.12	Putative GTP-binding protein, SAR1B (Secretion-associated RAS super family 1) (T12M4.12 protein);GTP-binding protein SAR1A	NaN	NaN	-0.397106	-0.44131	NaN	NaN	0.0164841	0.00835492	6	1	1	46.1	11.4	11.4	22.03	8.4847	6545900	3847700	2698200	-0.192692	-0.501124	-0.65114	-0.337744	-0.523849	-0.281675	-0.474789	-0.252483	NaN	-0.579479	NaN	NaN	NaN	NaN	NaN	NaN	NaN	NaN	0.294056	0.107528
AT5G13850	Q6ICZ8		Nascent polypeptide-associated complex subunit alpha-like protein 3 (NAC-alpha-like protein 3) (Alpha-NAC-like protein 3)	0.101391	-0.150347	-0.486378	-0.464254	0.474342	0.237883	0.00305176	0.00319828	6	4	4	54.9	41.7	41.7	22.057	76.779	42716000	24377000	18339000	-0.339539	-0.453871	-0.347025	-0.618523	-0.562313	-0.4916	NaN	-0.475532	-0.435091	-0.54329	-0.32674	NaN	-0.0612958	-0.14976	-0.063592	-0.204518	0.399594	0.189914	0.00919157	0.112775
AT1G18070	Q8L835;Q9LMS7	At1g18070;T10F20.8	At1g18070 (Putative guanine nucleotide regulatory protein) (Translation elongation factor EF1A/initiation factor IF2gamma family protein);T10F20.8 protein (Translation elongation factor EF1A/initiation factor IF2gamma family protein)	-0.0692325	-0.275438	-0.837582	-1.05042	0.687551	0.215217	0.00305176	0.000582552	6	6	6	15.8	15.8	15.8	59.242	61.421	25753000	14579000	11174000	-0.998796	-0.867563	-1.25982	-1.15522	-0.970719	-0.625283	-0.850189	NaN	-0.866017	-1.00884	-0.284164	NaN	-0.677697	-0.100236	-0.0396563	-0.434459	-0.022155	0.293207	-0.236375	0.0536197
AT1G79230	O64530-2;O64530;A8MR47	STR1;MST1	Thiosulfate/3-mercaptopyruvate sulfurtransferase 1, mitochondrial (EC 2.8.1.1) (EC 2.8.1.2) (AtMST1) (Rhodanese homolog protein 1) (AtRDH1) (Sulfurtransferase 1) (AtStr1);Sulfurtransferase	0.0121902	0.00576668	0.403176	0.773743	0.895653	0.951378	0.00442384	0.00483061	7	7	7	33.9	33.9	33.9	35.628	136.28	23272000	11819000	11453000	0.881484	0.623803	0.815942	NaN	NaN	0.470307	0.221702	0.399391	0.462971	0.461508	-0.0251718	-0.0873144	0.118997	-0.0949584	0.117281	0.0648308	0.128628	-0.124296	0.0406305	-0.0488424
AT4G24220	Q9STX2-2;Q9STX2	VEP1	3-oxo-Delta(4,5)-steroid 5-beta-reductase (EC 1.3.1.3) (Delta(4)-3-oxosteroid 5-beta-reductase) (Delta-4,5-steroid 5-beta-reductase) (At5beta-StR) (Progesterone 5-beta-reductase) (5beta-POR) (Protein VEIN PATTERNING 1)	0.0156899	0.294469	0.320362	0.33619	0.947265	0.142747	0.0470765	0.0140262	7	7	7	22	22	22	44.102	38.834	19713000	10399000	9314100	0.278217	NaN	0.486283	0.374367	0.205892	NaN	0.417894	0.154768	NaN	0.388425	-0.00442682	0.497995	NaN	0.425242	0.259064	0.372131	0.403322	-0.182102	-0.0292485	-0.485653
AT5G03880	Q940I2	MED24.18	Thioredoxin family protein	0.152013	0.0642725	0.311024	0.239907	0.0830947	0.523394	0.0115474	0.0211479	7	7	7	41	41	41	37.04	79.349	23712000	11403000	12309000	0.204381	0.146203	0.420053	0.30486	0.12404	0.304098	0.356522	0.500715	0.192919	0.200867	0.0604319	0.118067	0.13531	-0.0567189	NaN	0.180363	0.147883	0.0716983	0.185241	0.17488
AT5G47840	Q9FIJ7		Adenylate kinase 2, chloroplastic (AK 2) (EC 2.7.4.3) (ATP-AMP transphosphorylase 2) (ATP:AMP phosphotransferase) (Adenylate monophosphate kinase 2) (AMK2)	-0.0581773	0.170623	0.198136	0.188405	0.603142	0.113647	0.0133772	0.0372462	7	7	7	33.9	33.9	33.9	31.451	55.511	86776000	46561000	40214000	0.170526	0.152914	0.357406	0.0334832	0.227696	0.233032	0.136901	0.14239	0.221623	0.256735	0.236262	0.297934	0.136407	0.0655702	0.116943	-0.107614	0.167676	-0.0174475	-0.05739	-0.276111
AT1G73230	Q9CAT7	T18K17.10	Nascent polypeptide-associated complex subunit beta	-0.0281909	0.0728467	-0.171656	0.180286	0.8222	0.63792	0.0338732	0.0263579	7	7	6	65.5	65.5	65.5	18.004	102.51	68520000	37699000	30822000	0.229957	0.156735	0.305005	0.085775	0.12396	-0.196576	-0.238196	-0.0545009	-0.250662	-0.118347	-0.16043	-0.0609837	0.0898405	0.455347	0.0404597	-0.162621	-0.168536	0.0714946	0.241468	-0.12276
AT1G12250	B6EUA5;Q8H1Q1	At1g12250	Thylakoid lumenal protein TL20.3, chloroplastic;Pentapeptide repeat-containing protein	0.257924	0.227499	0.228098	0.136683	0.140052	0.101145	0.0107112	0.0320591	7	7	7	53.9	53.9	53.9	21.768	128.79	58295000	28692000	29603000	0.169008	0.184807	0.119089	0.0630582	0.147451	0.217686	0.311857	0.249951	0.133388	0.227608	0.164161	0.479463	0.140788	0.226756	0.126329	0.562456	0.451863	0.140726	0.178541	-0.0439661
AT1G07660;AT1G07820;AT2G28740;AT3G45930;AT3G46320;AT3G53730;AT5G59690;AT5G59970	P59259;A8MRV1	At1g07660	Histone H4	-0.578301	-0.294435	-0.194289	-0.151999	0.317311	0.209942	0.0224287	0.0334828	7	7	7	57.3	57.3	57.3	11.409	191.27	542640000	323220000	219420000	-0.201199	-0.0773613	-0.068607	-0.212643	-0.200183	-0.295438	-0.187625	-0.153068	-0.248331	-0.0869833	-0.061473	NaN	-0.158582	-0.222511	-0.735173	-0.438171	-0.0471812	-0.0361969	-0.0865571	-2.2834
AT3G49910	P51414	RPL26A	60S ribosomal protein L26-1	-0.0341809	-0.115278	-0.238666	-0.1979	0.900267	0.499833	0.00908741	0.0251937	7	7	7	37.7	37.7	37.7	16.944	73.645	186770000	104340000	82438000	-0.221579	-0.192832	-0.216986	-0.319422	-0.0386789	-0.20702	-0.180522	-0.193898	-0.33374	-0.278148	-0.00532047	-0.368476	0.226176	-0.0118893	-0.41688	0.0864985	-0.646114	-0.237462	0.476905	0.149268
AT1G56450	Q7DLR9	PBG1	Proteasome subunit beta type-4 (EC 3.4.25.1) (20S proteasome beta subunit G-1) (Proteasome component H) (Proteasome subunit beta type-7)	-0.202564	-0.246083	-0.258957	-0.242461	0.0571717	0.0892925	0.0133772	0.0217572	7	7	7	42.7	42.7	42.7	27.651	105.03	62753000	35279000	27474000	-0.245465	-0.286524	-0.0638895	-0.199489	-0.416939	-0.181345	-0.14493	-0.395315	-0.325045	-0.248149	-0.154562	NaN	-0.17402	-0.277082	-0.378667	-0.0964459	-0.169107	-0.284707	-0.227762	-0.2348
AT1G07140	Q9LMK7	RANBP1A	Ran-binding protein 1 homolog a (Ran-binding protein siRanBP)	-0.0776782	-0.0199114	1.06229	0.308379	0.603205	0.885311	0.0470765	0.0185946	8	8	5	50	50	31.1	25.601	67.457	51053000	27680000	23373000	0.541092	0.372297	0.0942096	0.225849	0.308448	-0.154138	0.634752	1.43033	2.0245	1.37602	-0.180307	NaN	0.142124	0.0968426	-0.138305	-0.236657	-0.205756	0.330602	-0.071247	-0.205333
AT2G25080	P52032	GPX1	Phospholipid hydroperoxide glutathione peroxidase 1, chloroplastic (PHGPx) (EC 1.11.1.12)	0.0548023	0.0808904	0.450962	0.232776	0.68683	0.419489	0.0184784	0.0140538	8	6	6	42.8	38.6	38.6	26.015	179.66	302780000	152800000	149980000	0.0807182	0.297011	0.312721	0.256163	0.217269	0.283557	0.323938	0.417929	0.879646	0.349742	0.115301	-0.0483361	-0.0229541	0.227776	0.132665	-0.118851	0.264352	0.248317	0.0732526	-0.193059
AT2G21530	Q8GWP4	At2g21530	At2g21530 (SMAD/FHA domain-containing protein)	0.00011682	0.106026	0.22341	0.20938	0.998825	0.2697	0.0239808	0.00868522	8	8	8	59.8	59.8	59.8	22.675	257.85	267400000	136480000	130920000	0.158689	0.232268	0.220074	0.244757	0.191111	0.11517	0.145113	0.300076	0.180166	0.376526	-0.0487589	0.177996	0.110461	0.203651	0.0867804	-0.222687	0.189572	0.13258	0.0609041	-0.159785
AT2G14720;AT2G14740	O80977;Q56ZQ3	VSR3;VSR4	Vacuolar-sorting receptor 3 (AtVSR3) (BP80-like protein a') (AtBP80a') (Epidermal growth factor receptor-like protein 2a) (AtELP2a);Vacuolar-sorting receptor 4 (AtVSR4) (BP80-like protein a) (AtBP80a) (Epidermal growth factor receptor-like protein 2b) (AtELP2b)	0.230326	0.0153241	-0.261774	-0.190292	0.0936923	0.891843	0.0367091	0.0214065	8	8	8	20.9	20.9	20.9	69.743	53.081	22292000	13009000	9283500	-0.177558	-0.203481	-0.194095	NaN	-0.186036	-0.260142	NaN	-0.445351	-0.191251	-0.150353	0.100779	NaN	0.0409397	0.0614768	-0.141899	0.0379485	0.16144	0.300042	0.470449	0.18175
AT3G25660	Q9LI77	GATA	Glutamyl-tRNA(Gln) amidotransferase subunit A, chloroplastic/mitochondrial (Glu-AdT subunit A) (EC 6.3.5.7)	0.0835758	0.157068	0.370688	0.42639	0.280813	0.240118	0.00485346	0.0247379	9	9	9	22.5	22.5	22.5	57.181	67.284	32460000	10462000	21998000	0.693923	0.191475	0.546511	NaN	0.273649	NaN	0.414323	0.356339	0.33192	0.380169	0.121863	NaN	0.222507	NaN	0.126833	0.175393	0.0309603	0.0795712	0.0323406	0.0996141
AT5G58290	Q9SEI4	RPT3	26S proteasome regulatory subunit 6B homolog (26S protease subunit 6B homolog) (26S proteasome AAA-ATPase subunit RPT3) (Protein BMAA insensitive morphology 409) (Regulatory particle triple-A ATPase subunit 3)	0.19316	0.128162	0.179489	0.277846	0.0862194	0.301485	0.0319879	0.0132038	9	8	8	37.5	34.6	34.6	45.751	170.09	29126000	15405000	13721000	0.260507	0.296393	0.470451	0.217351	0.14453	0.260751	0.188632	0.0377257	0.170924	0.239412	-0.0283304	-0.0383949	0.198077	0.360982	0.148474	0.366956	0.201087	0.0958826	0.0953125	0.206564
AT3G14930	Q93ZB6-2;Q93ZB6	HEME1	Uroporphyrinogen decarboxylase 1, chloroplastic (UPD1) (URO-D1) (EC 4.1.1.37)	0.0700307	0.204989	0.214272	0.251835	0.34706	0.142142	0.0111926	0.0112735	9	9	9	48.4	48.4	48.4	38.268	125.46	99104000	56051000	43053000	0.112374	0.341095	0.29921	0.214988	0.291509	0.147669	0.186791	0.28983	0.257041	0.19003	0.0113844	0.321397	0.417447	0.13528	0.139435	0.0544516	0.0819644	0.100527	-0.0229477	0.136158
AT4G09040	A8MS54;Q6NPL0	At4g09040	At4g09040 (RNA-binding (RRM/RBD/RNP motifs) family protein);RNA-binding (RRM/RBD/RNP motifs) family protein	0.166465	0.160781	0.236064	0.190197	0.0905298	0.155966	0.0326676	0.0422097	9	9	9	61.9	61.9	61.9	27.703	121.37	102430000	71819000	30607000	0.34567	0.140839	0.289094	0.0282454	0.147137	0.086346	0.277214	0.444712	0.141374	0.230672	0.115895	NaN	0.136895	0.153965	0.236369	0.153828	0.0770934	0.173849	0.301686	0.125869
AT4G29010	Q9ZPI6	AIM1	3-hydroxyacyl-CoA dehydrogenase (EC 1.1.1.35)];Peroxisomal fatty acid beta-oxidation multifunctional protein AIM1 (Protein ABNORMAL INFLORESCENCE MERISTEM 1) (AtAIM1) [Includes: Enoyl-CoA hydratase/3-2-trans-enoyl-CoA isomerase/3-hydroxybutyryl-CoA epimerase (EC 4.2.1.17) (EC 5.1.2.3) (EC 5.3.3.8)	0.0903434	-0.0102	0.223741	0.143329	0.417243	0.92664	0.039158	0.036974	9	9	9	19.4	19.4	19.4	77.857	73.449	34219000	18953000	15267000	0.0797656	0.145929	0.252831	0.102911	0.135208	0.334994	0.233505	0.240691	0.323081	-0.0135664	0.026085	-0.225586	-0.00940741	0.167685	-0.00977641	0.350781	0.104451	-0.0379873	0.000328839	0.0341437
AT4G05180	Q41932	PSBQ2	Oxygen-evolving enhancer protein 3-2, chloroplastic (OEE3) (16 kDa subunit of oxygen evolving system of photosystem II) (OEC 16 kDa subunit)	-0.93333	-0.254142	-0.325871	-0.271982	0.0658148	0.29989	0.0145108	0.0187294	9	7	7	40.4	35.7	35.7	24.643	323.31	1954600000	1200900000	753700000	-0.487798	-0.226031	-0.290433	-0.0957044	-0.259944	-0.515518	-0.243647	-0.127352	-0.42592	-0.316916	0.0838542	-0.168549	-0.296945	0.00616238	-0.895232	-1.23585	-0.794056	-0.110546	-0.626846	-1.89935
AT5G46800	Q93XM7	BOU	Mitochondrial carnitine/acylcarnitine carrier-like protein (Carnitine/acylcarnitine translocase-like protein) (CAC-like protein) (Protein A BOUT DE SOUFFLE)	0.0890419	-0.0260867	0.254288	0.27789	0.236005	0.852855	0.0228289	0.0232623	10	10	10	58	58	58	31.022	211.57	151530000	76892000	74643000	0.148948	0.235627	0.243163	0.560574	0.201138	0.196417	0.458552	0.103914	0.238977	0.273581	0.00317957	0.0475807	-0.310919	0.156595	-0.0268697	0.0672545	0.164278	0.0479457	0.0627712	0.10296
AT1G01790	Q9ZTZ7	KEA1	K(+) efflux antiporter 1, chloroplastic (AtKEA1)	0.198984	0.141146	0.222961	0.24634	0.106313	0.479956	0.040758	0.0346237	10	10	8	12.8	12.8	9.8	128.03	211.91	56556000	31144000	25412000	0.0450249	0.453311	0.138658	0.218006	0.376698	0.198476	0.403843	0.133879	0.326274	0.0523321	NaN	NaN	0.0188973	-0.0277713	0.432311	0.297098	0.0490076	0.265126	0.0369309	0.346755
ATCG00130	P56759	atpF	ATP synthase subunit b, chloroplastic (ATP synthase F(0) sector subunit b) (ATPase subunit I)	0.0520105	0.242729	0.195944	0.192907	0.619334	0.344335	0.0164977	0.032025	10	10	10	56.5	56.5	56.5	21.057	323.31	995940000	519190000	476760000	0.112232	0.203795	0.0611979	0.354711	0.2326	0.2572	0.167181	0.21001	0.0977789	0.247549	0.3987	0.887438	-0.0863916	-0.000240833	0.0141379	0.192941	0.034408	0.196681	-0.139861	-0.0241167
AT5G52840	Q9FLX7		Probable NADH dehydrogenase [ubiquinone] 1 alpha subcomplex subunit 5, mitochondrial	-0.180387	-0.380797	-0.257587	-0.195808	0.496379	0.113647	0.0495928	0.0364925	10	10	10	62.7	62.7	62.7	19.179	59.649	30867000	18847000	12020000	-0.0798464	-0.259011	NaN	-0.265558	-0.178818	-0.496831	-0.400997	-0.231483	-0.0529972	-0.105625	-0.484138	NaN	-0.71959	-0.178147	-0.141314	-0.447164	-0.0851493	0.148143	0.299708	-0.817472
AT1G16880	Q9FZ47;F4I613	ACR11;At1g16880	ACT domain-containing protein ACR11 (Protein ACT DOMAIN REPEATS 11);Uridylyltransferase-like protein	0.0607505	0.146357	0.305824	0.353221	0.649391	0.169258	0.0174283	0.0101062	11	11	11	46.2	46.2	46.2	31.294	323.31	579710000	311980000	267720000	0.330097	0.594019	0.286901	0.359947	0.195139	0.510081	0.178039	0.161906	0.401737	0.277358	-0.00279	0.183177	0.181399	0.10602	0.263979	0.281245	0.0242434	0.270732	-0.15717	-0.115298
AT3G56650	Q9LXX5	PPD6	PsbP domain-containing protein 6, chloroplastic (OEC23-like protein 1)	-0.0640566	0.0319374	0.270923	0.251669	0.625535	0.764265	0.00572598	0.0113799	11	11	11	59.9	59.9	59.9	28.63	197.82	154630000	87580000	67054000	0.167566	0.328567	0.146276	0.345022	0.270915	0.192153	0.275089	0.326436	0.248312	0.312624	-0.102708	0.20311	-0.0286818	0.0769408	0.0110261	-0.0226863	0.153035	0.041898	-0.109792	-0.382738
AT4G35000	Q42564	APX3	L-ascorbate peroxidase 3 (AtAPx03) (EC 1.11.1.11)	-0.0218412	0.102167	0.216514	0.223931	0.796787	0.414035	0.0142865	0.0253516	11	11	11	40.4	40.4	40.4	31.571	94.919	175740000	89714000	86027000	0.240614	0.255871	0.211585	0.0312769	0.380307	0.166862	0.192674	0.176329	0.348969	0.197738	-0.0814371	NaN	0.128586	0.124008	0.23751	-0.0899357	0.0315355	-0.00736891	0.0880653	-0.131502
ATCG00830;ATCG01310	P56791	rpl2-A	50S ribosomal protein L2, chloroplastic	0.222187	0.239737	0.195801	0.199183	0.0658148	0.0595994	0.0239496	0.0237108	11	11	11	49.3	49.3	49.3	29.864	323.31	390440000	197640000	192800000	0.22095	0.358144	0.174764	0.110274	0.131785	0.223494	0.332577	0.165368	0.10709	0.150477	0.387775	0.202746	0.236446	0.218963	0.152753	0.347686	0.296139	0.236489	0.0546548	0.175968
AT3G16640	P31265	TCTP	Translationally-controlled tumor protein 1 (TCTP1)	-0.211655	-0.168745	-0.284827	-0.30167	0.281435	0.184898	0.00485854	0.0131733	11	11	11	85.1	85.1	85.1	18.91	323.31	541360000	304900000	236470000	-0.193718	-0.180297	-0.514336	-0.352772	-0.267225	-0.315725	-0.333747	-0.307553	-0.276553	-0.190557	-0.221	-0.247942	0.0133337	-0.0370134	-0.351105	-0.12568	0.110894	-0.117797	-0.714993	-0.210699
AT1G22300	P48347-2;P48347;F4I1C1	GRF10	14-3-3-like protein GF14 epsilon (General regulatory factor 10);General regulatory factor 10	-0.362946	-0.204927	-0.408563	-0.33302	0.0978309	0.112304	0.0463559	0.0152447	11	10	8	50.4	46.5	39.8	28.9	261.42	232520000	128080000	104450000	-0.0676574	-0.319416	-0.330693	-0.428449	-0.518885	-0.881434	-0.317123	-0.519014	-0.250228	-0.0750149	-0.323805	-0.250517	0.0185005	-0.276872	-0.191943	-0.67666	-0.195041	-0.0853172	-0.157523	-0.700187
AT1G67280	Q8W593;Q8W593-2		Probable lactoylglutathione lyase, chloroplastic (EC 4.4.1.5) (Glyoxalase I)	0.0723575	0.170129	0.232799	0.297526	0.432554	0.323262	0.0182084	0.00353385	12	12	11	41.4	41.4	36.9	39.167	323.31	262140000	136460000	125680000	0.244112	0.34672	0.254776	0.312123	0.329901	0.304098	0.328818	0.0728582	0.209023	0.249199	0.0768189	-0.215324	0.230636	0.479456	0.279058	0.142597	0.219078	0.0553788	-0.0654997	0.0102332
AT1G71500	Q9C9I7	LIL8	LIGHT-HARVESTING-LIKE 8	0.166209	0.354428	0.228747	0.241764	0.231783	0.0894387	0.0204712	0.0187294	12	12	12	53.7	53.7	53.7	31.727	281.58	348120000	178670000	169450000	0.216453	0.292429	0.0648253	0.388062	0.247053	0.35211	0.277638	0.230767	0.0708909	0.212328	0.316591	0.793608	0.142973	0.294118	0.224851	0.399552	0.151177	0.151036	-0.135493	0.264774
AT5G02940	Q8VZM7		Putative ion channel POLLUX-like 1	0.0638992	0.262844	0.33883	0.206346	0.542997	0.196241	0.04248	0.0120753	12	12	12	16.6	16.6	16.6	92.137	54.269	22573000	11899000	10674000	0.251726	0.149631	0.268848	0.221671	0.139853	0.175806	0.609362	0.194761	NaN	0.375393	NaN	NaN	0.0434114	0.329141	0.41598	0.26892	0.0722514	-0.058378	-0.0917142	0.128417
AT1G51110	Q8LAP6	PAP12	Probable plastid-lipid-associated protein 12, chloroplastic (Fibrillin-10)	0.0588171	-0.0477727	0.281409	0.185962	0.432554	0.626504	0.0220603	0.0214065	12	12	12	40.3	40.3	40.3	45.765	123.85	64609000	33334000	31276000	0.256188	0.103147	0.200143	0.109144	0.261188	0.215654	0.416324	0.380067	0.338502	0.0564988	0.0589761	-0.233208	-0.0284085	0.0410027	-0.0772258	0.141665	0.00139728	0.0746557	-0.00790268	0.08427
AT2G30200	Q8RU07;F4IMR0	At2g30200	EMBRYO DEFECTIVE 3147;EMBRYO DEFECTIVE 3147 (Putative malonyl-CoA:Acyl carrier protein transacylase)	-0.0201183	-0.29327	-0.306353	-0.410579	0.850387	0.0703132	0.0234068	0.00221337	12	12	12	39.9	39.9	39.9	41.522	149.93	81840000	48518000	33322000	-0.455166	-0.417399	-0.388525	-0.474223	-0.317581	-0.075766	-0.210603	-0.40616	-0.325503	-0.513734	-0.253936	-0.359641	-0.0592007	-0.510764	-0.282807	0.160086	-0.0721147	-0.137346	0.0944	-0.145617
AT3G44110	Q94AW8;F4J1V2	ATJ3	Chaperone protein dnaJ 3 (AtDjA3) (AtJ3);DNAJ homologue 3	0.0389569	-0.497089	-0.732013	-1.1331	0.805968	0.396167	0.00435259	0.00771442	12	12	12	42.6	42.6	42.6	46.444	118.09	53732000	29584000	24148000	NaN	-0.555303	-1.17245	-1.46413	-1.3405	-0.826872	-0.981749	-0.423294	-0.562892	-0.86526	0.0855493	-0.0797295	0.537484	-1.64238	-1.38637	-0.0214853	0.256528	0.220047	0.0892566	-0.349562
AT1G19570	Q9FWR4;Q9FWR4-2	DHAR1	Glutathione S-transferase DHAR1, mitochondrial (EC 2.5.1.18) (Chloride intracellular channel homolog 1) (CLIC homolog 1) (Glutathione-dependent dehydroascorbate reductase 1) (AtDHAR1) (GSH-dependent dehydroascorbate reductase 1) (mtDHAR) (EC 1.8.5.1)	-0.174361	-0.276817	-0.238094	-0.312796	0.0978309	0.055536	0.0351528	0.0102064	13	13	12	77.9	77.9	74.6	23.641	259.19	234490000	139950000	94537000	-0.157714	-0.378683	-0.406804	-0.196114	-0.424663	-0.0661283	-0.217302	-0.246379	-0.194415	-0.466246	-0.386692	-0.215827	-0.245412	-0.160057	-0.376098	-0.1174	-0.146881	-0.0511965	-0.311146	-0.245182
AT5G28840	Q93VR3	GME	GDP-mannose 3,5-epimerase (GDP-Man 3,5-epimerase) (EC 5.1.3.18)	0.148455	0.0884514	0.265878	0.230317	0.140052	0.417276	0.00485346	0.012227	14	14	14	50.9	50.9	50.9	42.758	194.43	205860000	108800000	97064000	0.153423	0.243092	0.143309	0.28034	0.331421	0.319313	0.224674	0.275289	0.281112	0.229001	0.0243508	0.149666	0.228465	-0.113308	0.153083	0.325831	0.151749	0.0793686	0.0533642	0.13196
AT1G18540	Q9FZ76	RPL6A	60S ribosomal protein L6-1	-0.168721	-0.326857	-0.437896	-0.290839	0.338147	0.0729355	0.00305176	0.00868522	14	6	6	54.9	27.9	27.9	26.152	19.249	90041000	52046000	37995000	NaN	-0.294551	-0.230304	-0.336665	-0.301835	-0.357175	-0.477069	-0.420519	-0.558299	-0.376417	-0.350725	NaN	-0.253007	NaN	-0.376839	-0.529026	-0.0974357	-0.142569	0.231314	-0.305889
AT1G15980	Q9S9N6	PNSB1	Photosynthetic NDH subunit of subcomplex B 1, chloroplastic (Protein PnsB1) (NAD(P)H DEHYDROGENASE SUBUNIT 48) (NDH-DEPENDENT CYCLIC ELECTRON FLOW 1)	0.0258314	0.00863288	0.159562	0.147261	0.785127	0.918705	0.0310417	0.0491626	15	15	15	47.5	47.5	47.5	51.022	94.84	142780000	74080000	68699000	0.0597823	0.105691	0.281188	0.187942	0.101701	0.111664	0.152369	0.263893	0.170309	0.0995748	-0.0889603	-0.0276663	0.025098	0.1188	0.015893	0.0998534	0.113921	0.115708	-0.106798	-0.0935275
AT1G08200	Q9SGE0	AXS2	UDP-D-apiose/UDP-D-xylose synthase 2	-0.308883	-0.277935	-0.301261	-0.236638	0.0658148	0.0703132	0.0120129	0.0155009	15	15	4	53	53	17.5	43.79	178.5	113340000	64451000	48887000	-0.12261	-0.132517	-0.284956	-0.343903	-0.299202	-0.164737	-0.501068	-0.287535	-0.299105	-0.253861	-0.200084	-0.449036	-0.055159	-0.378712	-0.306686	-0.533858	-0.357808	-0.268852	-0.378051	-0.00584659
AT4G11420	Q9LD55	TIF3A1	Eukaryotic translation initiation factor 3 subunit A (eIF3a) (Eukaryotic translation initiation factor 3 large subunit) (Eukaryotic translation initiation factor 3 subunit 10) (eIF-3-theta) (p114)	-0.103304	NaN	0.288204	0.325454	0.305552	NaN	0.0063168	0.0244393	16	16	16	22.6	22.6	22.6	114.3	135.4	37562000	20709000	16853000	0.193414	0.324569	0.55616	0.227673	NaN	0.293093	0.270829	0.411288	0.249541	0.216268	0.0188755	NaN	NaN	NaN	NaN	0.0927011	-0.224435	-0.152544	-0.173096	-0.0591445
AT4G18810	Q8VYA4;F4JRN8	F28A21.220;At4g18810	At4g18810 (NAD(P)-binding Rossmann-fold superfamily protein);NAD(P)-binding Rossmann-fold superfamily protein	0.186088	0.16434	0.328611	0.30043	0.223617	0.0969057	0.0447165	0.0127538	16	16	16	40.8	40.8	40.8	65.467	95.003	50735000	26729000	24006000	0.189176	0.308466	0.525971	0.264817	0.213721	-0.0840665	0.506305	0.420445	0.339931	0.460441	0.0967281	0.246889	0.114426	0.188868	0.174789	0.487527	0.0181069	0.349976	0.0972496	-0.0224196
AT1G16080	Q9S9M7	T24D18.18	Nuclear protein (T24D18.18 protein)	-0.0636721	0.161014	0.259814	0.19378	0.708737	0.150523	0.00803604	0.0156917	16	16	16	62.3	62.3	62.3	34.13	323.31	339280000	182170000	157110000	0.141604	0.272317	0.14648	0.259478	0.149019	0.299501	0.186372	0.217444	0.357861	0.23789	0.0175726	0.0774357	0.204369	0.278872	0.226821	-0.078034	0.108391	0.219906	-0.0705817	-0.498042
AT5G23120	O82660	HCF136	Photosystem II stability/assembly factor HCF136, chloroplastic	0.241364	0.13749	0.28964	0.160673	0.0552058	0.142142	0.00584612	0.0399122	16	16	16	51.6	51.6	51.6	44.103	323.31	1046300000	547570000	498730000	0.0253688	0.212999	0.235305	0.224414	0.105276	0.311345	0.365295	0.214197	0.21662	0.340745	0.0888563	0.0710615	0.220094	0.179728	0.12771	0.411459	0.260644	0.237746	0.130723	0.16625
AT1G07890	Q05431;F4HU93	APX1	L-ascorbate peroxidase 1, cytosolic (AP) (AtAPx01) (EC 1.11.1.11);Ascorbate peroxidase 1	-0.188727	-0.088224	-0.238049	-0.124148	0.091233	0.414575	0.0145108	0.0334828	16	16	15	78.4	78.4	78.4	27.561	323.31	746560000	425880000	320680000	-0.15808	-0.125075	-0.13848	-0.0911665	-0.107937	-0.145582	-0.366157	-0.154919	-0.231352	-0.292234	-0.132988	-0.291938	0.0143951	-0.0658664	0.0352774	-0.124521	-0.0263878	-0.211707	-0.290916	-0.290101
AT5G43940	Q96533;F4K7D6	ADH2;HOT5	Alcohol dehydrogenase class-3 (EC 1.1.1.1) (Alcohol dehydrogenase class-III) (Glutathione-dependent formaldehyde dehydrogenase) (FALDH) (FDH) (GSH-FDH) (EC 1.1.1.-) (S-(hydroxymethyl)glutathione dehydrogenase) (EC 1.1.1.284);S-(hydroxymethyl)glutathione dehydrogenase (EC 1.1.1.284)	-0.15091	-0.182058	-0.170083	-0.153216	0.106313	0.0730504	0.0228289	0.0214504	16	16	16	64.4	64.4	64.4	40.698	323.31	320710000	186900000	133810000	-0.215821	-0.142108	-0.122979	-0.152337	-0.132836	-0.113662	-0.174787	-0.159796	-0.13611	-0.266061	-0.153644	-0.243168	-0.247096	-0.158314	-0.108068	-0.108945	-0.242608	-0.191546	-0.178958	-0.0324948
AT5G02870	F4KDU5;P49691	At5g02870;RPL4D	60S ribosomal protein L4-2 (L1);Ribosomal protein L4/L1 family	-0.1759	-0.325249	-1.0254	-0.512931	0.0812742	0.237103	0.00797633	0.0070938	16	6	6	46.8	15.8	15.8	44.592	167.29	116310000	69689000	46622000	-0.851605	-0.49728	-0.348753	-0.385059	-0.481959	-1.36311	-1.03458	-0.962274	-1.41691	-0.350101	-0.367309	0.00711257	-0.454307	0.124326	-0.936067	-0.299386	-0.0721315	-0.135193	-0.195964	-0.176825
AT1G77490	Q42593	APXT	L-ascorbate peroxidase T, chloroplastic (EC 1.11.1.11) (Thylakoid-bound ascorbate peroxidase) (AtAPx06) (tAPX)	-0.0945028	0.0405934	0.219856	0.145141	0.3005	0.880208	0.0145108	0.0305278	17	17	14	43.2	43.2	37.1	46.092	147.59	302310000	160500000	141810000	0.128325	0.0862166	0.0991637	0.200335	0.211667	0.0991999	0.275026	0.276591	0.177449	0.271013	-0.445152	NaN	-0.0460025	0.325486	0.328042	-0.0368793	-0.0345651	-0.217916	0.00701135	-0.190165
AT3G09820	Q9SF85;Q9SF85-2	ADK1	Adenosine kinase 1 (AK 1) (EC 2.7.1.20) (Adenosine 5'-phosphotransferase 1)	-0.161202	-0.188963	-0.225476	-0.219304	0.0978309	0.142142	0.0221052	0.0303139	17	17	8	76.5	76.5	43	37.836	323.31	519030000	300440000	218590000	-0.0537288	-0.138274	-0.216701	-0.406722	-0.281096	-0.0597989	-0.287133	-0.311591	-0.288806	-0.180049	-0.121155	-0.24044	0.0258876	-0.314476	-0.294634	-0.108353	-0.214134	-0.157107	-0.272084	-0.054333
AT3G51800	Q96327-4;Q96327;Q96327-3;Q96327-2	EBP1	ERBB-3 BINDING PROTEIN 1 (AtEBP1) (Proliferation-associated protein G2p) (AtG2) (Protein CELL-PROLIFERATION-RELATED) (AtCPR)	-0.0767222	-0.108766	-0.487488	-0.500058	0.479969	0.447008	0.00226193	0.0106493	17	17	17	53.5	53.5	53.5	42.295	204.02	69919000	39411000	30507000	-0.114552	-0.740647	-0.5277	-0.617798	-0.499591	-0.539336	-0.491522	-0.51357	-0.35975	-0.53326	-0.112392	NaN	-0.248544	0.14843	-0.222559	-0.148054	0.179507	-0.0545091	-0.215151	-0.145404
AT1G35720	Q9SYT0	ANN1	Annexin D1 (AnnAt1) (Annexin A1)	-0.529178	-0.247851	-0.311549	-0.264792	0.0552058	0.0729355	0.0204504	0.0152355	18	18	18	67.5	67.5	67.5	36.203	239.73	228120000	140450000	87676000	-0.132968	-0.40178	-0.138605	-0.316534	-0.334071	-0.16576	-0.422628	-0.108353	-0.461555	-0.399448	-0.32823	-0.379874	-0.151081	-0.322959	-0.0571095	-0.568395	-0.347746	-0.323176	-0.323104	-1.08347
AT1G43170	P17094;A8MQQ1	ARP1;RP1	60S ribosomal protein L3-1 (Protein EMBRYO DEFECTIVE 2207);Ribosomal protein 1	0.0692274	-0.00585497	-0.198266	-0.149561	0.325304	0.943667	0.0111926	0.0276019	19	19	14	53.7	53.7	41.6	44.559	323.31	820890000	451090000	369790000	-0.189692	-0.0599785	-0.140993	-0.1521	-0.205043	-0.254968	-0.191103	-0.22282	-0.171524	-0.150915	-0.00232735	-0.0527233	0.104617	-0.0554768	-0.0233644	0.0754451	0.127712	0.0326902	0.064403	0.0458869
AT3G58610	Q05758		Ketol-acid reductoisomerase, chloroplastic (EC 1.1.1.86) (Acetohydroxy-acid reductoisomerase) (Alpha-keto-beta-hydroxylacyl reductoisomerase)	0.139046	0.128956	0.234829	0.191475	0.135076	0.269276	0.0362807	0.0269767	20	20	20	55	55	55	63.812	323.31	755320000	395340000	359980000	0.203146	0.308466	0.196709	0.21853	0.0305232	0.459246	0.211926	0.111111	0.281222	0.110641	0.210837	0.189321	0	-0.0444657	0.289086	0.256775	0.103239	0.0902031	0.0432809	0.201732
AT2G07698	F4IMB5	At2g07698	ATPase, F1 complex, alpha subunit protein	-0.104736	-0.142967	-0.26016	-0.268396	0.289523	0.211859	0.00748475	0.00864871	20	1	1	33.8	0.9	0.9	85.932	55.79	727420000	404350000	323070000	-0.323231	-0.2802	-0.13041	-0.26488	-0.343257	-0.171545	-0.275042	-0.277071	-0.347298	-0.229843	-0.219597	-0.0401189	-0.00805982	-0.328804	-0.118254	0.0780458	-0.222191	-0.122539	-0.0646841	-0.192313
AT1G79550	Q9SAJ4;Q9SAJ4-2	T8K14.3	Phosphoglycerate kinase 3, cytosolic (EC 2.7.2.3)	-0.103402	-0.106542	-0.22634	-0.176784	0.323809	0.259047	0.0232852	0.0264948	21	18	18	71.3	63.3	63.3	42.131	323.31	523070000	295240000	227830000	-0.159156	-0.206511	-0.274223	-0.0443679	-0.199664	-0.054837	-0.287575	-0.343111	-0.252653	-0.193522	-0.185212	-0.104678	0.0454897	-0.164802	-0.123507	0.0482311	0.000301838	-0.0993746	-0.293094	-0.173076
AT1G21750	Q9XI01;F4HZN9	PDIL1-1	Protein disulfide isomerase-like 1-1 (AtPDIL1-1) (EC 5.3.4.1) (Protein disulfide-isomerase 1) (PDI 1) (Protein disulfide-isomerase 5) (AtPDI5);Protein disulfide-isomerase (EC 5.3.4.1)	-0.193686	-0.217603	-0.437122	-0.182542	0.0558718	0.170964	0.00632636	0.0166164	22	22	19	52.3	52.3	45.1	55.601	239	131140000	78040000	53098000	-0.221069	-0.173102	-0.234889	-0.0857202	-0.197928	-0.431042	-0.399361	-0.294988	-0.366624	-0.693594	-0.419139	0.110187	-0.210553	-0.214284	-0.354228	-0.215443	-0.24026	-0.176008	-0.237322	-0.0993969
AT2G36880	Q9SJL8	METK3	S-adenosylmethionine synthase 3 (AdoMet synthase 3) (EC 2.5.1.6) (Methionine adenosyltransferase 3) (MAT 3)	-0.0782772	-0.109415	-0.321351	-0.402297	0.353322	0.485621	0.00452373	0.0027084	22	22	13	75.4	75.4	45.1	42.497	323.31	779650000	449810000	329840000	-0.306158	-0.437175	-0.494706	-0.462327	-0.31112	-0.206094	-0.343946	-0.350947	-0.328204	-0.377562	-0.212127	-0.151677	-0.0123768	-0.416454	0.245562	-0.00582327	-0.113243	-0.193898	-0.110502	0.0320801
AT3G04120	P25858	GAPC1	Glyceraldehyde-3-phosphate dehydrogenase GAPC1, cytosolic (EC 1.2.1.12) (NAD-dependent glyceraldehydephosphate dehydrogenase C subunit 1)	-0.0401842	-0.335773	-0.474893	-0.359537	0.894329	0.312446	0.00485346	0.00444952	23	2	2	78.1	9.8	9.8	36.914	101.7	122720000	70035000	52688000	-0.346064	-0.475254	-0.412789	-0.214818	-0.348758	-0.451471	-0.571416	-0.232855	-0.558752	-0.559971	-0.108884	-0.426933	-0.109198	0.184789	-1.21864	0.803991	-0.300398	-0.220292	-0.130177	-0.354045
AT3G14420	Q9LRR9;Q9LRR9-2;A8MS37;B3H4B8;Q2V3V9	GOX1	(S)-2-hydroxy-acid oxidase GLO1 (EC 1.1.3.15) (Glycolate oxidase 1) (AtGLO1) (GOX 1) (Short chain alpha-hydroxy acid oxidase GLO1);Aldolase-type TIM barrel family protein	0.32008	0.181085	0.343593	0.247669	0.0626823	0.0721413	0.0108504	0.0246539	24	24	9	79.6	79.6	28.1	40.341	323.31	4266700000	2112300000	2154400000	0.204742	0.392692	0.262497	0.349695	0.0287184	0.592654	0.288979	0.258619	0.291892	0.285821	0.170315	0.174036	0.140302	0.153775	0.266997	0.531954	0.333683	0.475216	0.0925277	0.16702
AT4G13940	O23255;F4JTV4;F4JTV5;A8MQP1	SAHH1;MEE58	Adenosylhomocysteinase (EC 3.3.1.1);Adenosylhomocysteinase 1 (AdoHcyase 1) (EC 3.3.1.1) (Protein EMBRYO DEFECTIVE 1395) (Protein HOMOLOGY-DEPENDENT GENE SILENCING 1) (S-adenosyl-L-homocysteine hydrolase 1) (SAH hydrolase 1);S-adenosyl-L-homocysteine hydrolase	-0.108992	-0.17091	-0.277372	-0.272855	0.177057	0.0969057	0.0140614	0.00483061	24	24	10	63.9	63.9	27.4	53.378	323.31	1616700000	937100000	679640000	-0.204601	-0.273372	-0.253264	-0.340598	-0.292439	-0.139675	-0.407809	-0.376806	-0.180101	-0.28247	-0.0905926	-0.20288	-0.212554	-0.250111	-0.0984122	-0.107891	-0.10654	-0.0729703	-0.206888	-0.0506703
AT1G68010	Q9C9W5;Q9C9W5-2	HPR	Glycerate dehydrogenase HPR, peroxisomal (GDH) (EC 1.1.1.29) (NADH-dependent hydroxypyruvate reductase 1) (AtHPR1) (HPR 1)	0.186921	0.202306	0.294305	0.147187	0.106313	0.0703132	0.00384058	0.0486644	27	27	27	86.5	86.5	86.5	42.247	323.31	2313800000	1178700000	1135100000	0.0361487	0.271185	0.10764	0.181235	0.139726	0.35605	0.293201	0.268868	0.253062	0.300346	0.235561	0.0942973	0.204485	0.176867	0.300319	0.229034	0.278304	0.313351	0.122735	-0.00881764
AT5G28540	Q9LKR3	MED37A	Mediator of RNA polymerase II transcription subunit 37a (Heat shock 70 kDa protein 11) (Heat shock protein 70-11) (AtHsp70-11) (Luminal-binding protein 1) (AtBP1) (BiP1)	-0.196193	-0.209367	-0.192813	-0.230919	0.0624292	0.122227	0.0131707	0.00799301	27	25	1	52.2	49.6	3.6	73.628	323.31	577240000	344760000	232480000	-0.179194	-0.305474	-0.219376	-0.240469	-0.21008	-0.144295	-0.21259	-0.218756	-0.140469	-0.247955	-0.390276	-0.021835	-0.138065	-0.165666	-0.330992	-0.183534	-0.154163	-0.323073	-0.161033	-0.159163
AT3G23990	P29197	CPN60	Chaperonin CPN60, mitochondrial (HSP60)	-0.122214	-0.24794	-0.280264	-0.302786	0.256689	0.0817074	0.0218463	0.0051176	27	27	15	64.3	64.3	41.2	61.28	323.31	208480000	114140000	94339000	-0.293572	-0.273739	-0.273334	-0.238112	-0.435175	-0.478559	-0.16025	-0.141304	-0.377995	-0.243213	-0.1894	-0.249403	-0.0432393	-0.447439	-0.310219	0.0393505	0.00434618	-0.228447	-0.180752	-0.245569
AT2G39730	P10896;F4IVZ7;P10896-2	RCA	Ribulose bisphosphate carboxylase/oxygenase activase, chloroplastic (RA) (RuBisCO activase);Rubisco activase	0.170631	0.165622	0.256673	0.211973	0.111809	0.0936184	0.00485346	0.0269658	28	28	28	72.6	72.6	72.6	51.981	323.31	15197000000	7536200000	7660900000	0.0399017	0.315075	0.155462	0.328484	0.220942	0.291937	0.279257	0.220213	0.261842	0.230116	0.145361	0.210379	0.241667	0.128192	0.10251	0.283218	0.256927	0.214525	0.0242423	0.0742409
AT3G46780	Q9STF2;Q9STF2-2	T6H20.190	Protein PLASTID TRANSCRIPTIONALLY ACTIVE 16, chloroplastic (pTAC16)	-0.103723	-0.237206	-0.123016	-0.180097	0.281435	0.055536	0.0470765	0.0182462	29	29	29	59.4	59.4	59.4	54.358	323.31	1419800000	811470000	608370000	-0.252203	-0.0865915	-0.162333	-0.204715	-0.194643	-0.0750198	-0.0788721	-0.175726	-0.146031	-0.139431	-0.292805	-0.19102	-0.157476	-0.256703	-0.288024	-0.0889872	-0.00326023	-0.057761	-0.29689	-0.0717178
AT5G02500	P22953;F4KCE5	MED37E;HSC70-1	Heat shock cognate protein 70-1;Probable mediator of RNA polymerase II transcription subunit 37e (Heat shock 70 kDa protein 1) (Heat shock cognate 70 kDa protein 1) (Heat shock cognate protein 70-1) (AtHsc70-1) (Heat shock protein 70-1) (AtHsp70-1) (Protein EARLY-RESPONSIVE TO DEHYDRATION 2)	-0.113653	-0.0934959	-0.227815	-0.222385	0.144389	0.418115	0.00588982	0.0106493	30	14	10	62.2	33.3	27.3	71.357	323.31	926840000	514200000	412640000	-0.186899	-0.257739	-0.206136	-0.31278	-0.148373	-0.241788	-0.232854	-0.242834	-0.205588	-0.216009	-0.154837	-0.0603567	0.125274	-0.283658	-0.0939019	-0.134649	-0.0669471	-0.105737	-0.1748	-0.0861326
AT3G03780	Q9SRV5	MS2	5-methyltetrahydropteroyltriglutamate--homocysteine methyltransferase 2 (EC 2.1.1.14) (Cobalamin-independent methionine synthase 2) (AtMS2)	-0.0630474	-0.151977	-0.301475	-0.367114	0.40149	0.12917	0.0204846	0.00432575	31	11	11	57	25.4	25.4	84.583	313.75	260140000	148110000	112030000	-0.524109	-0.260703	-0.326691	-0.376108	-0.347961	-0.168977	-0.403491	-0.30309	-0.130502	-0.501316	-0.281335	-0.119289	-0.118766	-0.0843579	-0.156138	0.0171268	-0.135267	-0.0179807	-0.0967073	-0.0824087
AT2G30950	O80860	FTSH2	ATP-dependent zinc metalloprotease FTSH 2, chloroplastic (AtFTSH2) (EC 3.4.24.-) (Protein VARIEGATED 2)	0.206513	0.269484	0.243335	0.236146	0.0862194	0.060581	0.0291445	0.0217261	32	32	14	63	63	30.6	74.157	323.31	1403800000	706660000	697090000	0.171576	0.126994	0.143292	0.357093	0.381775	0.0719548	0.376042	0.270395	0.131599	0.366682	0.241154	0.326423	0.154813	0.448727	0.176305	0.314434	0.280137	0.193517	-0.00503957	0.249516
AT1G62750	Q9SI75	CPEFG	Elongation factor G, chloroplastic (cEF-G) (Elongation factor EF-G/SCO1) (Protein SNOWY COTYLEDON 1, chloroplastic) (AtSCO1)	0.208004	0.228861	0.218689	0.201607	0.0573028	0.0571585	0.00908741	0.0115219	32	32	32	58.7	58.7	58.7	86.057	323.31	1393900000	696750000	697200000	0.141941	0.246425	0.155259	0.229624	0.234788	0.278765	0.169064	0.222339	0.172017	0.251258	0.210694	0.142465	0.2656	0.210961	0.314584	0.25534	0.250932	0.287688	0.104881	0.141179
AT3G60750	Q8RWV0;F4JBY2	TKL-1;At3g60750	Transketolase-1, chloroplastic (TK) (EC 2.2.1.1);Transketolase	0.15685	0.121174	0.220043	0.149252	0.0892357	0.170964	0.00908741	0.0232623	37	37	30	76.1	76.1	67.2	79.967	323.31	5570000000	2852700000	2717300000	0.0856162	0.186143	0.169778	0.14364	0.161085	0.28472	0.163305	0.178255	0.228727	0.245209	0.151061	0.173044	0.047565	0.0812456	0.152955	0.218184	0.137826	0.205702	0.0570219	0.165515
AT5G17920	O50008	MS1	5-methyltetrahydropteroyltriglutamate--homocysteine methyltransferase 1 (EC 2.1.1.14) (Cobalamin-independent methionine synthase 1) (AtMS1) (Vitamin-B12-independent methionine synthase 1)	-0.032422	-0.085928	-0.162053	-0.144487	0.649178	0.296379	0.0271914	0.0346681	37	37	16	64.6	64.6	31.8	84.356	323.31	4218800000	2357700000	1861100000	-0.154274	-0.0409572	-0.155955	-0.150677	-0.220572	-0.0678263	-0.224255	-0.200738	-0.1517	-0.165747	-0.0670255	-0.143006	0.00961266	-0.133077	-0.0961443	-0.0669836	-0.018868	-0.0275465	-0.0956395	0.0469278
AT5G04140	Q9ZNZ7;Q9ZNZ7-2	GLU1	Ferredoxin-dependent glutamate synthase 1, chloroplastic/mitochondrial (EC 1.4.7.1) (Fd-GOGAT 1)	0.200878	0.140243	0.19768	0.132858	0.0658148	0.170964	0.0180495	0.0276019	73	73	63	68.9	68.9	61.9	176.75	323.31	4113700000	2096200000	2017500000	0.0856162	0.136423	0.152395	0.155597	0.134258	0.323721	0.165482	0.180741	0.148693	0.169765	0.301816	0.130381	0.0813827	0.106414	0.0812227	0.289684	0.203159	0.259224	0.0458083	0.206514
ATCG01100	Q37165	ndhA	NAD(P)H-quinone oxidoreductase subunit 1, chloroplastic (EC 1.6.5.-) (NAD(P)H dehydrogenase subunit 1) (NDH subunit 1) (NADH-plastoquinone oxidoreductase subunit 1)	0.439425	NaN	NaN	0.291753	0.146367	NaN	NaN	0.0127538	1	1	1	5.6	5.6	5.6	40.021	8.398	10225000	5140600	5084200	0.135996	0.275082	0.230428	0.335146	0.482111	NaN	NaN	0.202029	NaN	0.458303	NaN	NaN	NaN	0.653323	0.129687	0.177062	0.279875	0.174725	1.2538	0.311661
AT2G19680	O82209		Copia-like retroelement pol polyprotein (Mitochondrial ATP synthase subunit G protein)	NaN	-0.172782	NaN	-0.297438	NaN	0.202372	NaN	0.00873694	1	1	1	9	9	9	13.847	8.626	7288000	4258000	3030000	-0.271497	-0.370804	NaN	-0.251134	-0.296318	NaN	NaN	NaN	-0.018417	NaN	NaN	NaN	-0.20625	-0.169995	-0.142101	-0.565906	NaN	NaN	NaN	-0.411427
AT2G33590;AT2G33600	O22810;O22809	At2g33600;At2g33590	At2g33600 (NAD(P)-binding Rossmann-fold superfamily protein) (Putative cinnamoyl-CoA reductase);NAD(P)-binding Rossmann-fold superfamily protein (Putative cinnamoyl-CoA reductase)	NaN	-0.484595	NaN	-0.771906	NaN	0.310555	NaN	0.00221337	1	1	1	3.7	3.7	3.7	35.614	13.207	5035600	2808300	2227300	-0.770715	-0.832051	-1.01646	-0.550631	-0.689672	NaN	NaN	NaN	-0.695197	-0.924891	0.0183545	NaN	NaN	-0.24517	-1.22697	NaN	NaN	NaN	NaN	NaN
AT3G22231;AT3G22235	Q8W472;Q94C26	MKA23.16;PCC1	Cysteine-rich and transmembrane domain-containing protein PCC1 (Protein PATHOGEN AND CIRCADIAN CONTROLLED 1);Cysteine-rich TM module stress tolerance protein	NaN	NaN	-0.784131	NaN	NaN	NaN	0.00226193	NaN	1	1	1	23.9	23.9	23.9	7.3171	5.1408	2830500	1692000	1138500	NaN	NaN	NaN	NaN	NaN	-0.768281	-0.740003	-0.702313	-0.925928	NaN	NaN	NaN	NaN	NaN	NaN	NaN	NaN	NaN	NaN	NaN
AT2G25670	Q9SL96	At2g25670	Expressed protein	NaN	NaN	-1.67404	NaN	NaN	NaN	0.00226193	NaN	1	1	1	5.3	5.3	5.3	35.128	4.1391	2280700	1909600	371120	NaN	NaN	-1.32138	NaN	-1.22051	-1.68503	-1.55231	NaN	NaN	-1.78477	NaN	NaN	NaN	NaN	NaN	NaN	NaN	NaN	NaN	NaN
AT2G05310;AT4G13500	Q9T0H1;Q9SJ31	T6G15.50;At2g05310	At4g13500 (Transmembrane protein);Expressed protein (Transmembrane protein)	0.549266	NaN	NaN	0.898148	0.330494	NaN	NaN	0.000582552	2	2	2	20	20	20	13.817	38.548	11408000	4530300	6877500	0.911124	0.952715	0.853988	NaN	0.874766	NaN	NaN	0.856233	NaN	NaN	0.711391	NaN	1.1156	NaN	NaN	NaN	0.995115	1.03055	NaN	-0.377866
AT5G40950	Q9FLN4	RPL27	50S ribosomal protein L27, chloroplastic (CL27)	0.281833	-0.0034574	0.116751	0.315313	0.325304	0.993056	0.310411	0.00444952	2	2	2	12.1	12.1	12.1	21.737	29.223	81476000	41604000	39872000	0.20647	0.378738	0.3218	0.29259	0.376965	-0.0158562	-0.0633325	0.265794	0.2804	NaN	0.44753	NaN	0.322732	-0.0675616	-0.71653	0.440425	-0.503538	0.206843	0.657767	0.60767
AT1G75750	F4I0N7;P46689	GASA1	GAST1 protein homolog 1;Gibberellin-regulated protein 1 (GAST1 protein homolog 1)	0.528026	NaN	NaN	0.184803	0.0552058	NaN	NaN	0.0492018	2	2	2	27.8	27.8	27.8	10.645	74.691	24402000	11579000	12823000	0.211281	0.0426021	NaN	0.24347	0.241859	NaN	NaN	0.799078	NaN	NaN	0.181571	NaN	NaN	0.502354	NaN	0.744045	0.0436387	0.84102	0.353744	0.657683
AT4G33625	Q8GXK1;B3H5F4	At4g33625	At4g33625 (Vacuole protein);Vacuole protein	NaN	NaN	-0.0960442	-0.238228	NaN	NaN	0.270585	0.025751	2	2	2	12	12	12	22.613	51.94	5586400	3215300	2371100	NaN	-0.103092	-0.255581	-0.347138	-0.247099	0.034614	0.0245428	-0.253685	-0.0362636	-0.249429	NaN	NaN	NaN	NaN	NaN	NaN	NaN	NaN	-0.173233	NaN
AT5G15350	Q39131		Lamin-like protein	0.0647268	NaN	-0.189588	-0.335995	0.734433	NaN	0.270585	0.0305212	2	2	2	12.2	12.2	12.2	19.435	2.7418	13438000	7105000	6333500	-0.475752	NaN	-0.388895	-0.430297	-0.0490342	-0.292949	-0.37372	NaN	0.0979046	NaN	NaN	NaN	-0.140898	NaN	NaN	0.240151	NaN	-0.332349	0.0736693	0.277436
AT2G31810	Q93YZ7-2;Q93YZ7-3;Q93YZ7		Acetolactate synthase small subunit 2, chloroplastic (Acetohydroxy-acid synthase small subunit) (AHAS) (ALS)	-0.39621	NaN	-0.257569	-0.181929	0.0513075	NaN	0.0326934	0.146049	2	2	2	5.7	5.7	5.7	47.227	5.5849	6293600	3570800	2722800	-0.335058	NaN	NaN	-0.0234072	-0.187322	-0.214962	NaN	NaN	-0.273506	-0.284239	NaN	NaN	NaN	0.799531	NaN	NaN	-0.625577	-0.376822	-0.210774	-0.371669
AT4G28660	F4JM05;Q8W0Y8	PSB28	Photosystem II reaction center PSB28 protein, chloroplastic (Photosystem II protein W-like);Photosystem II reaction center Psb28 protein	0.103697	0.0433842	0.284286	-0.0352675	0.436326	0.832714	0.00839616	0.782473	2	2	2	11.6	11.6	11.6	21.943	14.8	116180000	63536000	52642000	0.159454	0.257397	-0.268648	-0.233677	-0.0908634	NaN	0.281031	0.276094	0.295405	0.284615	0.382724	NaN	-0.174776	0.122522	-0.156933	0.306971	-0.147972	0.14627	0.273021	-0.0598045
ATCG00190	P50546	rpoB	DNA-directed RNA polymerase subunit beta (EC 2.7.7.6) (PEP) (Plastid-encoded RNA polymerase subunit beta) (RNA polymerase subunit beta)	NaN	NaN	0.371668	NaN	NaN	NaN	0.00584612	NaN	2	2	2	2.5	2.5	2.5	121.06	5.2648	4815200	2532800	2282400	NaN	NaN	NaN	NaN	NaN	0.333246	NaN	0.435185	0.399582	0.318659	NaN	NaN	NaN	NaN	NaN	NaN	NaN	NaN	0.441608	-0.00163203
AT1G10200	Q94JX5	WLIM1	LIM domain-containing protein WLIM1 (Widely-expressed LIM protein 1) (AtWLIM1)	-0.277471	NaN	-0.339479	NaN	0.271884	NaN	0.0164841	NaN	2	2	2	17.9	17.9	17.9	21.04	41.533	7649600	4378800	3270700	NaN	NaN	NaN	-0.271361	NaN	-0.362912	NaN	-0.304467	NaN	-0.351059	-0.180289	NaN	NaN	NaN	NaN	-0.143805	-0.631422	NaN	-0.0571873	NaN
AT1G44835	Q8GXG9;F4HPK3	At1g44835	YbaK/aminoacyl-tRNA synthetase-associated domain-containing protein	-0.323326	NaN	-0.175484	NaN	0.0658148	NaN	0.0351528	NaN	2	2	2	8.1	8.1	8.1	33.71	4.7286	3367700	1904400	1463300	NaN	NaN	NaN	NaN	NaN	-0.187533	-0.221097	-0.126038	NaN	-0.167268	NaN	NaN	NaN	NaN	NaN	-0.429002	-0.368186	-0.400268	-0.0958478	NaN
AT4G25450	F4JSM3;Q8LPQ6;Q8LPQ6-2;Q8LPQ6-3	NAP8;ABCB28	ABC transporter B family member 28 (ABC transporter ABCB.28) (AtABCB28) (Non-intrinsic ABC protein 8) (TAP-related protein 1);Non-intrinsic ABC protein 8	NaN	NaN	NaN	0.601757	NaN	NaN	NaN	0.00221337	3	3	3	11.9	11.9	11.9	59.245	18.147	8516000	3670800	4845200	0.425693	0.717048	0.692124	0.595903	0.578017	NaN	NaN	0.350241	NaN	0.443611	NaN	NaN	NaN	0.937417	0.507851	0.904214	NaN	NaN	NaN	NaN
AT1G74880	Q9S829	ndhO	NAD(P)H-quinone oxidoreductase subunit O, chloroplastic (EC 1.6.5.-) (NAD(P)H dehydrogenase subunit O) (NDH subunit O) (NDH-O) (NADH-plastoquinone oxidoreductase subunit O)	0.943209	0.337808	NaN	0.528856	0.197507	0.0571585	NaN	0.02792	3	3	3	20.9	20.9	20.9	17.657	7.3203	40886000	16689000	24197000	0.288991	NaN	NaN	0.493612	0.803964	NaN	NaN	NaN	0.681753	NaN	0.460174	NaN	0.226749	0.384981	0.279327	-0.0987388	NaN	0.562519	2.41478	0.894276
AT2G26590	O48726	RPN13	26S proteasome regulatory subunit RPN13 (AtRPN13) (26S proteasome non-ATPase regulatory subunit 13)	0.0097181	NaN	NaN	0.468912	0.974601	NaN	NaN	0.0238999	3	3	3	15.3	15.3	15.3	33.297	79.843	11428000	6205900	5221800	0.885874	0.297877	0.69329	0.294207	0.173312	NaN	NaN	0.651241	0.0170074	NaN	NaN	NaN	-0.128134	0.290735	NaN	NaN	-0.345382	0.00878841	0.542603	-0.167137
AT5G01650	Q9M011;F4K9G5	F7A7_170;At5g01650	Light-inducible protein ATLS1 (Tautomerase/MIF superfamily protein);Tautomerase/MIF superfamily protein	NaN	-0.135368	0.259654	0.441509	NaN	0.517493	0.0556472	0.00969461	3	3	3	37.4	37.4	37.4	12.111	30.559	19064000	9561100	9502900	0.444557	0.557323	0.126794	0.637264	0.441608	0.402273	0.479622	0.257835	0.199345	-0.0408025	0.179985	NaN	-0.340856	-0.457405	0.0768037	NaN	-1.02508	NaN	NaN	NaN
AT5G56260	Q9FH13		Putative 4-hydroxy-4-methyl-2-oxoglutarate aldolase 3 (HMG aldolase 3) (EC 4.1.3.17) (Oxaloacetate decarboxylase) (OAA decarboxylase) (EC 4.1.1.3) (Regulator of ribonuclease activity homolog 3) (RraA-like protein 3)	NaN	-0.0108005	NaN	0.420238	NaN	0.959811	NaN	0.022332	3	3	3	24.1	24.1	24.1	17.567	4.6899	8020100	3862700	4157500	NaN	0.240908	0.484802	NaN	0.535005	0.19628	NaN	NaN	NaN	NaN	-0.308467	NaN	0.0773255	0.19874	NaN	NaN	NaN	NaN	NaN	NaN
AT1G69530	Q9C554;B3H5D9;C0Z241	EXPA1	Expansin;Expansin-A1 (AtEXPA1) (Alpha-expansin-1) (At-EXP1) (AtEx1) (Ath-ExpAlpha-1.2)	0.163981	0.182802	-0.0135435	0.38351	0.372266	0.29989	0.866223	0.0101062	3	3	3	24	24	24	26.517	32.721	74614000	37146000	37468000	0.449408	0.16516	0.568162	0.472561	0.262261	-0.00272527	0.112212	-0.0056766	NaN	-0.157984	0.208555	-0.277276	0.26905	0.401428	0.312254	0.265644	NaN	NaN	-0.0877734	0.314072
AT2G33430	O22793	MORF2	Multiple organellar RNA editing factor 2, chloroplastic (Protein DIFFERENTIATION AND GREENING-like 1) (Protein DAG-like 1) (RNA editing-interacting protein 2)	0.0602909	0.15117	0.0799201	0.330097	0.861351	0.342479	0.342943	0.0231766	3	3	3	23.3	23.3	23.3	24.715	37.596	24272000	13016000	11257000	0.448943	0.43106	0.528588	0.0539084	0.187986	-0.110889	-0.0222546	0.129807	0.177143	0.225794	-0.034584	NaN	0.0451002	0.424094	0.170068	0.015703	-0.781277	0.372404	0.738848	-0.0442234
AT5G20630	P94072	GER3	Germin-like protein subfamily 3 member 3 (AtGER3) (AtGLP2)	0.0381173	0.0329586	0.165262	0.295075	0.815669	0.83249	0.0526457	0.0048591	3	3	3	37.9	37.9	37.9	21.836	323.31	733270000	391380000	341890000	0.385281	0.313242	0.202537	0.310894	0.26342	0.089352	0.32692	0.21714	0.0910993	0.101798	0.169157	0.331321	-0.094235	-0.102696	-0.138754	0.0596917	0.322166	0.0648369	0.11432	-0.370428
AT4G34620	O65686	T4L20.200	30S ribosomal protein S16-1, chloroplastic (Small subunit ribosomal protein 16)	0.028291	0.145749	0.0839036	0.24787	0.846187	0.269276	0.30343	0.010357	3	3	3	42.5	42.5	42.5	12.699	304.71	249050000	129930000	119120000	0.245202	0.346123	0.173695	0.158604	0.315728	-0.0849676	0.056514	0.17159	0.0208777	0.255504	0.386261	0.118196	0.00267658	0.252621	-0.0310082	0.0561509	-0.203321	0.206273	0.270438	-0.188086
AT4G18430	O49513	RABA1E	Ras-related protein RABA1e (AtRABA1e)	0.0241198	0.0433942	0.175128	0.152328	0.725899	0.771658	0.0580316	0.0274121	3	1	1	13.4	5.1	5.1	24.33	19.904	39604000	22021000	17583000	0.205654	0.0628298	0.145731	0.141983	0.20544	0.0429942	0.303447	0.226552	0.0430444	0.259602	0.183373	NaN	-0.0483555	-0.00483483	NaN	0.039217	0.0456409	-0.0346616	0.0243859	0.046017
AT3G10950;AT3G60245	Q8RXU5;Q9SRK6	RPL37AC;RPL37AB	60S ribosomal protein L37a-2;Putative 60S ribosomal protein L37a-1	-0.00148312	-0.0392423	0.13063	-0.267624	0.994618	0.862746	0.413299	0.0284433	3	3	3	34.8	34.8	34.8	10.241	89.998	142620000	77116000	65505000	-0.0933531	-0.263928	-0.377486	-0.494161	-0.109192	-0.169012	0.25614	0.167891	0.560823	-0.162692	0.194787	NaN	0.0397673	0.0788576	-0.470381	0.115509	-0.551043	-0.0364332	0.0207886	0.443763
AT4G13770	P48421	CYP83A1	Cytochrome P450 83A1 (EC 1.14.14.43) (CYPLXXXIII) (Protein REDUCED EPIDERMAL FLUORESCENCE 2)	NaN	NaN	NaN	-0.556225	NaN	NaN	NaN	0.00597138	3	3	3	8.4	8.4	8.4	57.448	6.3221	4136000	2687900	1448100	-0.427755	-0.534226	-0.359549	-0.901866	-0.557727	NaN	NaN	NaN	NaN	NaN	NaN	NaN	NaN	NaN	NaN	NaN	NaN	NaN	NaN	NaN
AT4G33640	Q8LBN7		Costars family protein At4g33640	-0.387344	-0.383489	NaN	-0.583771	0.0709247	0.0703132	NaN	0.0405858	3	3	3	53.7	53.7	53.7	10.42	40.091	17969000	10803000	7165700	NaN	-0.672595	NaN	-0.876259	-0.20246	-0.631072	NaN	NaN	-0.171221	NaN	-0.176314	NaN	-0.399546	-0.322044	-0.636051	-0.519681	-0.803674	-0.158723	-0.236059	-0.218584
AT2G37170	P43287	PIP2-2	2) (Plasma membrane intrinsic protein 2b) (PIP2b) (TMP2b);Aquaporin PIP2-2 (Plasma membrane intrinsic protein 2-2) (AtPIP2	NaN	NaN	NaN	-0.984452	NaN	NaN	NaN	0.00221337	3	2	2	10.5	7	7	30.453	3.5654	8800700	4411600	4389000	-1.18994	-0.817654	NaN	-1.05949	-0.870723	NaN	NaN	NaN	NaN	NaN	NaN	NaN	NaN	NaN	NaN	NaN	NaN	NaN	NaN	NaN
AT2G45710;AT3G61110	O64650;Q9M2F1	RPS27A;RPS27B	40S ribosomal protein S27-1;40S ribosomal protein S27-2	0.0224832	-0.0347988	-0.198676	-0.0213738	0.818141	0.880208	0.0470765	0.81602	3	3	2	45.2	45.2	29.8	9.405	59.411	66450000	37569000	28881000	-0.0801935	0.0947776	-0.0787054	NaN	NaN	-0.19755	-0.087252	-0.421704	-0.144925	-0.141951	-0.350326	-0.0908092	-0.283628	0.0680353	0.482734	0.199972	-0.00834817	-0.0722605	-0.0895869	0.0826396
AT5G28060	Q8LC83	RPS24B	40S ribosomal protein S24-2	-0.00024748	NaN	-0.318619	-0.0239952	0.998825	NaN	0.032459	0.83465	3	3	2	26.3	26.3	18	15.419	178.28	111300000	62818000	48482000	-0.0359102	0.102156	-0.0224956	-0.362716	0.19899	-0.559929	-0.37177	-0.0498018	-0.427858	-0.183735	-0.139714	NaN	0.158419	NaN	NaN	-0.020372	-0.492836	0.0288711	0.427059	0.0560405
AT5G16390	F4KE21;Q42533	CAC1;BCCP1	Biotin carboxyl carrier protein of acetyl-CoA carboxylase 1, chloroplastic (AtBCCP1) (BCCP-1);Biotin carboxyl carrier protein of acetyl-CoA carboxylase	-0.437347	-0.43528	-0.656982	NaN	0.115907	0.2697	0.00226193	NaN	3	3	3	17.3	17.3	17.3	26.927	323.31	45795000	28506000	17289000	NaN	NaN	NaN	-0.41489	NaN	-0.690457	-0.729408	-0.619443	-0.588619	NaN	-0.323682	-0.995589	NaN	NaN	0.0134313	-0.83205	-0.55933	0.0276765	-0.0399534	-0.783077
AT5G23820	Q9FF98	UQI3	MD-2-related lipid-recognition protein 3	NaN	NaN	-0.652656	NaN	NaN	NaN	0.00584612	NaN	3	3	3	19.5	19.5	19.5	17.907	5.04	12164000	6580800	5582900	NaN	NaN	NaN	NaN	NaN	NaN	-0.554099	-0.70988	NaN	-0.69399	NaN	NaN	NaN	NaN	NaN	NaN	NaN	NaN	NaN	NaN
AT2G24420	Q9ZQ26	At2g24420	AT2G24420 protein (At2g24420/T28I24.15) (DNA repair ATPase-like protein) (Expressed protein)	NaN	NaN	-1.18823	NaN	NaN	NaN	0.00584612	NaN	3	3	3	8.9	8.9	8.9	50.351	29.846	5906400	3861800	2044500	NaN	-1.6749	NaN	NaN	-0.639888	-1.41845	-1.20257	NaN	-0.943677	NaN	NaN	NaN	-0.330123	0.345415	NaN	NaN	NaN	0.313616	NaN	NaN
AT5G02450	Q9LZ57	RPL36C	60S ribosomal protein L36-3	0.40712	NaN	-0.423184	NaN	0.0927126	NaN	0.0157064	NaN	3	3	1	26.9	26.9	10.2	12.189	5.5877	11014000	6061700	4952000	NaN	NaN	NaN	NaN	NaN	-0.650111	-0.358389	-0.254593	-0.429644	NaN	NaN	NaN	NaN	NaN	-0.724592	0.239178	NaN	NaN	0.648969	0.333213
AT3G47650	Q9SN73	F1P2.200	DnaJ/Hsp40 cysteine-rich domain superfamily protein	0.173648	0.260519	0.488341	0.416225	0.473544	0.223043	0.169841	0.0125661	4	4	4	56.6	56.6	56.6	14.546	274.95	128150000	64562000	63592000	0.510605	0.40031	NaN	NaN	0.33776	0.117797	0.188665	0.322901	1.66057	0.151771	0.466633	-0.168046	0.358277	0.601944	0.0437856	0.379397	-0.488327	0.0967757	0.283727	0.596669
AT1G31340;AT2G35635	Q8RUC6;Q9SHE7	RUB2;RUB1	NEDD8-like protein RUB1 (Ubiquitin-related protein 1) (AtRUB1)];NEDD8-like protein RUB2 (Ubiquitin-related protein 2) (AtRUB2)];Ubiquitin-NEDD8-like protein RUB1 [Cleaved into: Ubiquitin;Ubiquitin-NEDD8-like protein RUB2 [Cleaved into: Ubiquitin	NaN	NaN	0.191128	0.390584	NaN	NaN	0.0955494	0.00872221	4	1	1	31.2	9.1	9.1	17.15	20.033	10639000	5577800	5060700	0.531461	0.268286	NaN	0.340694	0.421895	-0.0605701	0.0863025	0.224477	0.323004	0.382425	NaN	NaN	-0.172645	1.06022	NaN	NaN	NaN	NaN	0.723305	NaN
AT2G40510;AT2G40590;AT3G56340	Q9LYK9;P49206;Q8LPJ7	RPS26C;RPS26A;RPS26B	40S ribosomal protein S26-1;40S ribosomal protein S26-2;40S ribosomal protein S26-3	-0.0836177	-0.367338	0.104016	0.354651	0.840603	0.131685	0.233724	0.0162997	4	4	4	30	30	30	14.628	159.86	71223000	39083000	32140000	0.267781	0.415197	NaN	NaN	0.380975	NaN	0.0407744	0.10045	NaN	0.170825	0.0147023	NaN	-0.638341	-0.341761	-0.503952	-0.0472223	-1.11384	-0.0961508	0.837877	0.00124758
AT1G68590	A8MQL0;Q9SX22	At1g68590	30S ribosomal protein 3-1, chloroplastic (Plastid-specific 30S ribosomal protein 3-1) (PSRP-3 1);Ribosomal protein PSRP-3/Ycf65	-0.208414	NaN	NaN	0.346391	0.260539	NaN	NaN	0.0120753	4	4	4	43.6	43.6	43.6	18.146	40.674	61631000	34752000	26880000	0.260398	0.510846	0.264178	0.176117	0.520418	NaN	NaN	0.225507	NaN	NaN	-0.154323	NaN	NaN	0.326624	NaN	-0.261328	-0.413402	0.26923	-0.220619	-0.415952
AT2G26340	F4IUJ0;F4IUI9	At2g26340	Uncharacterized protein	-0.0885417	0.0802469	0.205267	0.304873	0.524592	0.506801	0.0877464	0.0121393	4	4	4	26.1	26.1	26.1	27.824	167.99	53781000	29643000	24138000	0.139041	0.277466	0.228627	0.457985	0.421246	0.285108	-0.020146	0.173507	0.11126	0.476606	0.114448	0.0413447	0.358173	-0.0180026	-0.0947288	0.06565	0.0238527	0.0665828	-0.158774	-0.44002
AT5G12140	Q945Q1	CYS1	Cysteine proteinase inhibitor 1 (AtCYS-1)	NaN	-0.572279	0.056036	0.297261	NaN	0.323262	0.737979	0.0247322	4	4	4	59.4	59.4	59.4	11.255	47.32	29213000	16766000	12446000	0.430298	0.170705	0.220592	0.119425	0.545284	-0.303767	-0.288273	0.267442	0.332683	0.272095	-0.35555	-1.46616	NaN	0.104874	NaN	NaN	-1.1156	NaN	0.133146	NaN
AT1G08830	P24704	CSD1	Superoxide dismutase [Cu-Zn] 1 (EC 1.15.1.1) (Copper/zinc superoxide dismutase 1)	-0.12323	0.134338	0.0927253	0.292529	0.227616	0.427912	0.528857	0.00444952	4	4	3	48.7	48.7	40.1	15.098	306.98	261340000	142640000	118700000	0.30657	0.342653	0.270818	0.343461	0.199141	0.0690172	-0.189363	0.00388956	0.570952	0.00913076	-0.177675	0.0949519	0.216179	0.0168288	0.521406	-0.0403834	-0.121722	-0.288502	-0.186978	0.0214345
AT3G61430	P61837	PIP1-1	1) (Plasma membrane aquaporin-1) (Plasma membrane intrinsic protein 1a) (PIP1a);Aquaporin PIP1-1 (AtPIP1	-0.241192	0.0276886	0.217935	0.255031	0.114105	0.869981	0.1071	0.0217084	4	2	1	17.8	9.8	6.3	30.688	58.668	32353000	19238000	13115000	0.0599083	0.247193	0.249044	0.271274	0.447737	NaN	0.23723	-0.00446841	0.456122	0.182856	NaN	NaN	-0.0316911	0.215747	-0.10099	0.0120866	-0.189922	-0.480219	-0.139566	-0.408341
AT1G02150	Q8LPS6		Pentatricopeptide repeat-containing protein At1g02150	0.0978501	0.109618	0.131207	0.188815	0.299278	0.413002	0.0949449	0.0116533	4	4	4	12.8	12.8	12.8	59.882	35.236	24811000	12703000	12108000	0.232289	0.18641	0.203651	0.186201	0.135524	0.078304	0.177836	0.00208756	0.118024	0.279781	0.016448	NaN	0.119367	0.193038	NaN	NaN	0.149029	0.0500303	0.153724	0.038617
AT1G75600;AT4G40030;AT4G40040;AT5G10980	A8MRL0;P59169;Q9LR02	At4g40030;HTR4	Histone H3.3 (Histone H3.2);Histone H3-like 3;Histone superfamily protein	-0.338871	-0.283062	0.131192	0.169646	0.255421	0.128014	0.114762	0.0291066	4	4	1	33.5	33.5	5.5	18.702	113.33	170500000	91190000	79307000	0.241985	0.0976202	0.246504	0.198874	0.0632445	0.283557	-0.0477219	0.116641	0.164644	0.138839	-0.117035	-0.114135	-0.462073	-0.439003	NaN	-0.414101	-0.0176775	-0.0588751	-0.0680513	-1.13565
AT5G44130	Q9FFH6	FLA13	Fasciclin-like arabinogalactan protein 13	0.112502	0.479437	-0.100489	-0.180592	0.333786	0.442289	0.173714	0.0176658	4	4	3	22.7	22.7	19	26.205	40.529	133240000	91164000	42079000	-0.240879	-0.156091	-0.246069	-0.148648	-0.111275	0.0443989	-0.0284821	-0.223854	-0.153366	-0.141141	0.277121	NaN	0.0401581	1.91127	-0.310801	0.0662068	0.393318	-0.0329932	0.087882	0.0480979
AT5G53560	Q42342	CYTB5-E	Cytochrome b5 isoform E (AtCb5-E) (Cytochrome b5 isoform 1) (Cytochrome b5 isoform A) (AtCb5-A)	-0.131758	-0.311848	NaN	-0.286521	0.308789	0.165788	NaN	0.00868522	4	4	4	36.6	36.6	36.6	15.084	19.399	29630000	16792000	12838000	-0.277588	-0.441233	-0.20618	-0.198876	-0.308728	-0.250786	NaN	NaN	-0.0919667	NaN	NaN	NaN	-0.478105	-0.0864636	-0.370975	-0.143711	-0.208011	NaN	0.0849449	-0.260253
ATCG01060	P62090	psaC	Photosystem I iron-sulfur center (EC 1.97.1.12) (9 kDa polypeptide) (PSI-C) (Photosystem I subunit VII) (PsaC)	-0.0604387	-0.455649	0.507301	-0.287297	0.828715	0.131685	0.470846	0.0331282	4	4	4	63	63	63	9.0384	323.31	1329800000	762760000	567000000	0.00299627	-0.224397	-0.54608	-0.349797	-0.319206	-0.214542	-0.0640298	-0.0160583	3.03786	-0.206727	0.0365106	-0.874404	-0.148242	-0.414887	-0.877223	0.238873	-0.819679	-0.102128	0.0320546	0.348686
AT5G12860	B3H4S6;Q9LXV3	DiT1;DIT1	Dicarboxylate transporter 1, chloroplastic (2-oxoglutarate/malate translocator 1) (AtpOMT1);Dicarboxylate transporter 1	0.0349717	NaN	-0.328663	-0.288651	0.815669	NaN	0.116128	0.00864871	4	4	4	12.1	12.1	12.1	59.026	12.315	41080000	22585000	18495000	-0.45094	-0.270419	-0.239377	-0.288333	-0.194185	-0.93543	0.0368776	-0.291473	-0.262996	-0.190296	NaN	NaN	-0.378601	NaN	NaN	-0.16337	-0.1286	-0.00116103	0.0615813	0.406408
AT2G22990	A8MR78;Q8RUW5;Q8RUW5-2;Q3EBW0;F4IKK4;A8MQW0	SNG1;SCPL8	Serine carboxypeptidase-like 8 (Protein SINAPOYLGLUCOSE ACCUMULATOR 1) (Sinapoylglucose--malate O-sinapoyltransferase) (SMT) (EC 2.3.1.92) (Sinapoylglucose--sinapoylglucose O-sinapoyltransferase) (EC 2.3.1.103);Sinapoylglucose 1	0.0829605	-0.587645	-0.537731	-0.419263	0.454687	0.170964	0.136247	0.0217572	4	4	4	21.4	21.4	21.4	47.584	66.222	20419000	11310000	9108900	NaN	-0.307936	-0.63738	-0.554118	-0.177619	-0.70511	NaN	-1.2929	-0.106608	-0.0463052	0.0979151	NaN	-1.27521	-0.652706	-0.520581	-0.0675404	0.207155	0.0340735	NaN	0.158154
AT2G22230	Q9SIE3	At2g22230	At2g22230/T26C19.11 (Putative beta-hydroxyacyl-ACP dehydratase) (Thioesterase superfamily protein)	-0.0173813	-0.274632	NaN	-0.53824	0.907778	0.0969057	NaN	0.00267284	4	3	3	21.4	15.9	15.9	24.242	31.624	22174000	12520000	9654000	-0.466708	-0.620164	NaN	-0.53683	-0.529256	NaN	NaN	NaN	NaN	NaN	-0.298615	NaN	-0.296452	NaN	-0.228828	-0.0536311	0.247055	0.0942181	-0.0235914	-0.350957
AT2G38540	Q42589	LTP1	Non-specific lipid-transfer protein 1 (LTP 1)	0.085293	-0.3141	1.47319	1.28017	0.641207	0.459288	0.0273316	0.112438	4	4	4	32.2	32.2	32.2	11.755	21.012	89048000	46106000	42942000	-0.130329	1.22332	-0.228116	2.2291	3.30689	2.24938	NaN	1.0753	1.0949	NaN	0.211976	NaN	0.222737	-0.511643	-1.17947	-0.114391	-0.245317	0.144394	0.0915449	0.550234
AT4G15000	A8MS28;P51419	At4g15000;RPL27C	60S ribosomal protein L27-3;Ribosomal L27e protein family	-0.290214	-0.228516	-0.294442	-0.0909081	0.0516907	0.203171	0.0259929	0.153544	4	1	1	29	8.4	8.4	15.035	27.587	57091000	31546000	25545000	-0.140743	-0.0558666	-0.0582057	NaN	-0.108817	-0.37103	-0.461761	-0.143728	-0.40992	-0.0857698	0.00761591	-0.250201	-0.00147434	-0.298108	-0.600414	-0.389527	-0.394214	-0.183784	-0.0871523	-0.396392
AT5G64940	Q93Y08	ABC1K8	Protein ACTIVITY OF BC1 COMPLEX KINASE 8, chloroplastic (ABC1-LIKE KINASE 8) (EC 2.7.11.1) (ABC2 homolog protein 13) (AtATH13) (Oxidative stress-related ABC1-like protein 1, chloroplastic) (AtOSA1)	0.239582	NaN	-0.265055	-0.21611	0.528182	NaN	0.0137611	0.231649	4	4	4	6.4	6.4	6.4	86.022	16.069	14069000	9001600	5067800	-0.69313	-0.0730398	NaN	-0.0523449	-0.045927	-0.216424	NaN	-0.253516	-0.239908	-0.350371	-0.578315	NaN	NaN	0.0642991	NaN	-0.233772	1.3805	-0.204538	0.16919	0.0865315
AT1G11430	Q9LPZ1	MORF9	Multiple organellar RNA editing factor 9, chloroplastic (RNA editing-interacting protein 9)	-0.0249864	0.218404	0.2172	0.101732	0.880219	0.201798	0.0111926	0.247378	4	4	4	24.6	24.6	24.6	26.2	79.839	47193000	25900000	21293000	-0.0614071	0.199038	-0.00317061	0.308311	0.0658869	0.115141	0.223662	0.268853	0.242393	0.23595	0.283369	0.468895	0.0682827	0.0530695	NaN	NaN	-0.0311847	0.120834	0.150655	-0.34025
AT5G17770	Q9ZNT1	CBR1	NADH--cytochrome b5 reductase 1 (EC 1.6.2.2)	-0.130484	-0.406941	-0.341061	-0.151344	0.245098	0.113037	0.0108504	0.441211	4	4	4	22.4	22.4	22.4	31.49	40.712	23098000	13241000	9856100	0.318153	NaN	-0.0924886	-0.508577	-0.322463	-0.404136	-0.239298	-0.166159	-0.385031	-0.510683	NaN	NaN	-0.62727	-0.416712	-0.176841	-0.280752	-0.137694	-0.264238	0.0176874	0.0125755
AT1G32470	Q9LQL0	GDH3	Glycine cleavage system H protein 3, mitochondrial	0.189335	0.133108	0.229416	-0.278873	0.124435	0.195483	0.0111926	0.450381	4	4	2	48.2	48.2	30.7	17.897	323.31	1015100000	531350000	483780000	0.144439	0.0247476	-1.57677	-0.172418	0.185635	0.189395	0.219199	0.231702	0.345433	0.161351	-0.0275065	0.118196	0.250815	0.174496	0.149541	0.393561	0.124714	0.0667243	0.0569283	0.304747
AT1G09200;AT3G27360;AT5G10390;AT5G10400;AT5G65350;AT5G65360	P59226;Q9FKQ3	HTR2	Histone H3.2 (Histone H3.1);Histone H3-like 5	0.00882838	-0.0535624	-0.233176	NaN	0.939998	0.597274	0.0217652	NaN	4	2	1	40.4	30.1	23.5	15.268	60.642	54933000	30101000	24831000	NaN	NaN	-0.0562834	-0.27667	NaN	-0.329621	-0.210471	NaN	-0.192766	-0.199847	0.0549492	0.108113	-0.130537	-0.12612	-0.174217	-0.232301	0.0271148	0.0465597	0.208114	-0.00534558
AT4G13200	Q8LDV3		Uncharacterized protein At4g13200, chloroplastic	-0.0356852	NaN	-0.528181	NaN	0.778726	NaN	0.0338732	NaN	4	4	4	29.7	29.7	29.7	20.429	14.727	14879000	7697000	7181900	NaN	NaN	NaN	NaN	NaN	-0.0884104	-0.765215	NaN	-0.555753	-0.703345	0.386766	NaN	NaN	NaN	NaN	0.0276929	-0.025579	-0.225576	0.228843	-0.183807
AT4G17040	Q8LB10	CLPR4	ATP-dependent Clp protease proteolytic subunit-related protein 4, chloroplastic (ClpR4) (Protein HAPPY ON NORFLURAZON 5)	0.38541	0.43395	0.880369	NaN	0.338807	0.0730504	0.0409838	NaN	4	4	4	17.7	17.7	17.7	33.44	21.233	51583000	25149000	26434000	NaN	NaN	NaN	1.01331	1.67574	0.304607	1.66175	1.36702	0.921452	0.147016	0.567012	0.497698	NaN	0.237141	NaN	0.358289	0.17022	1.50672	-0.355465	0.247286
AT3G27240	Q9LK29	CYC11	Cytochrome c1 1, heme protein, mitochondrial (Complex III subunit 4-1) (Complex III subunit IV-1) (Cytochrome b-c1 complex subunit 4-1) (Ubiquinol-cytochrome-c reductase complex cytochrome c1 subunit 1) (Cytochrome c-1 1)	-0.311552	-0.0666545	1.76271	2.44774	0.323073	0.608739	0.0730207	0.016104	5	5	1	26.4	26.4	5.5	33.65	57.331	31695000	14395000	17300000	3.33433	2.97402	3.15259	-0.116907	2.89465	-0.00419234	3.1469	2.85479	2.89487	-0.078821	0.039033	NaN	-0.201313	-0.203084	0.098746	NaN	-0.283187	-0.23987	-0.939213	0.216064
AT4G29670	Q8LCT3-2;Q8LCT3		Thioredoxin-like 2-2, chloroplastic (Atypical cysteine/histidine-rich thioredoxin 2) (AtACHT2)	-0.195966	0.308087	NaN	0.490886	0.376886	0.335166	NaN	0.00868522	5	5	5	30.6	30.6	30.6	25.843	23.548	22027000	12501000	9526400	0.4078	NaN	0.692007	0.321791	0.541945	0.155603	NaN	0.5616	NaN	NaN	0.384241	NaN	0.0775794	-0.159368	0.929896	-0.14301	0.115623	0.0599025	-0.205792	-0.806553
AT5G22650	Q56WH4-2;Q56WH4	HDT2	Histone deacetylase HDT2 (HD-tuins protein 2) (Histone deacetylase 2b)	0.131242	NaN	NaN	0.375959	0.537559	NaN	NaN	0.0187294	5	5	5	22.6	22.6	22.6	32.218	26.028	10705000	6127500	4577000	NaN	0.298742	NaN	0.328727	0.500409	NaN	-0.211905	NaN	NaN	0.701193	-0.210465	NaN	-0.180594	NaN	NaN	NaN	-0.16488	0.406833	0.151774	NaN
AT2G26670	O48782;O48782-2	HO1	Heme oxygenase 1, chloroplastic (AtHO1) (EC 1.14.14.18) (Protein GENOMES UNCOUPLED 2) (Protein REVERSAL OF THE DET PHENOTYPE 4)	-0.0592801	0.232133	0.100258	0.294147	0.696679	0.0716577	0.192879	0.0439918	5	5	5	23	23	23	32.691	36.483	31353000	16630000	14722000	0.358568	0.324084	0.0217047	0.472232	NaN	0.0519182	-0.0178089	0.0305329	0.170241	0.266405	0.132961	0.239211	0.373454	0.104229	0.310809	-0.169584	0.0830295	0.0757651	0.142402	-0.428013
AT2G25830	O82314		Probable transcriptional regulatory protein At2g25830	0.151907	0.0153566	0.203601	0.258811	0.527391	0.963868	0.107403	0.0276019	5	5	5	26.3	26.3	26.3	36.813	51.88	17066000	8761900	8304200	0.21553	NaN	NaN	0.243083	0.317821	0.269916	NaN	NaN	0.0566745	0.284213	-0.339475	NaN	-0.349381	0.802628	-0.0523458	-0.326194	0.167818	0.0481049	0.0688462	0.80096
ATCG00720	P56773	petB	Cytochrome b6	0.190495	0.160232	0.173288	0.255164	0.142014	0.401347	0.213721	0.0399395	5	5	5	28.8	28.8	28.8	24.152	125.39	404070000	208230000	195840000	0.102191	0.153188	NaN	0.407847	0.357428	-0.21939	0.386244	0.0831563	0.262467	0.353963	-0.0520552	NaN	0.0946155	0.537559	0.0608093	0.169917	0.170926	0.0585595	0.0785916	0.47448
AT4G39710	Q9SCY3;F4JW56	PNSL4;FKBP16-2	Photosynthetic NDH subunit of lumenal location 4, chloroplastic (FK506-binding protein 16-2) (AtFKBP16-2) (Immunophilin FKBP16-2) (Peptidyl-prolyl cis-trans isomerase FKBP16-2) (PPIase FKBP16-2) (EC 5.2.1.8) (Rotamase);Peptidylprolyl isomerase (EC 5.2.1.8)	0.178433	0.209772	NaN	0.201661	0.163714	0.183722	NaN	0.0180275	5	5	5	45.2	45.2	45.2	23.259	135.21	35441000	18511000	16931000	0.100252	0.193336	0.146736	0.281595	0.286388	NaN	NaN	NaN	NaN	NaN	0.554713	0.157083	0.155054	-0.00804767	0.190057	0.11104	0.17022	0.133676	0.459736	0.0174954
AT5G08410	Q8LBP6	FTRA2	At5g08410 (Ferredoxin/thioredoxin reductase subunit A (Variable subunit) 2) (Putative lipoic acid synthase)	0.157311	0.431098	0.129715	0.173631	0.405129	0.0776983	0.192582	0.0498157	5	5	5	37	37	37	20.146	144.8	69339000	33449000	35890000	0.270651	0.224747	0.0028815	0.0959384	0.273936	0.251658	-0.12249	0.0805468	0.300127	0.138735	0.357715	NaN	0.727369	0.512249	0.127057	0.665053	0.104421	0.108932	0.0689856	-0.160836
ATCG00810	P56795	rpl22	50S ribosomal protein L22, chloroplastic	0.120946	0.0961101	0.0190077	0.167081	0.184199	0.457815	0.731056	0.0243942	5	5	5	38.1	38.1	38.1	18.586	323.31	230940000	118870000	112070000	0.208802	0.20801	0.211601	0.152171	0.0548198	-0.0596513	-0.0179826	0.103749	0.0723724	-0.0034492	0.152887	-0.200548	0.142002	0.0711016	0.315108	0.0870796	0.248661	0.169875	0.0885007	0.0106144
AT1G22450	Q9S7L9	COX6B-1	Cytochrome c oxidase subunit 6b-1 (AtCOX6b-1)	-0.321379	-0.321653	-0.125072	-0.310185	0.480234	0.173906	0.807535	0.00319828	5	5	5	35.6	35.6	35.6	21.195	128.34	40258000	18274000	21983000	-0.37388	-0.277104	-0.33499	-0.310471	-0.254481	-0.930833	-0.759201	-0.467187	-0.137188	1.66905	-0.229173	-0.24937	-0.212724	-0.0166765	-0.900322	NaN	-1.34591	-0.37283	0.217887	0.215337
AT3G17020	Q9LSP5	At3g17020	AT3g17020/K14A17_14 (Adenine nucleotide alpha hydrolases-like superfamily protein)	-0.274583	-0.305894	-0.156746	-0.320199	0.0547037	0.0776983	0.0542556	0.00862868	5	5	5	49.7	49.7	49.7	17.775	51.796	45751000	27148000	18603000	NaN	-0.364042	-0.292833	-0.244473	-0.379447	-0.0119472	-0.268437	-0.151336	-0.221256	-0.130753	-0.125323	-0.602121	-0.194169	-0.412884	-0.194974	-0.306111	-0.46808	-0.232696	-0.0877994	-0.278228
AT2G16950	Q8H0U4;Q8H0U4-2	TRN1	Transportin-1 (AtTRN1) (Importin beta-2) (Karyopherin beta-2)	-0.231594	-0.256906	NaN	-0.884438	0.144442	0.448416	NaN	0.00728434	5	5	5	10.4	10.4	10.4	99.108	44.687	9862200	5357300	4504800	NaN	NaN	-0.965244	-0.63972	-1.04835	NaN	NaN	NaN	NaN	-0.618979	-1.02641	NaN	0.0608534	-0.144852	0.0827827	0.0656009	-0.492523	-0.35691	-0.0937666	-0.280371
AT2G28900	Q9ZV24	OEP161	Outer envelope pore protein 16-1, chloroplastic (Chloroplastic outer envelope pore protein of 16 kDa 1) (AtOEP16-1) (OEP16-1) (Outer plastid envelope protein 16-L) (AtOEP16-L) (Leave outer plastid envelope protein 16) (Protochlorophyllide-dependent translocon protein 16) (Ptc16)	-0.87706	0.254106	NaN	-2.55026	0.411575	0.575359	NaN	0.00845304	5	5	5	47.3	47.3	47.3	15.482	54.868	49059000	29889000	19171000	-0.773257	-3.46778	-3.10304	-1.97685	-3.43037	0.808411	NaN	NaN	NaN	NaN	0.00756672	NaN	-0.220648	1.33799	-0.108486	0.952051	1.29303	-2.3527	-2.35494	-1.92274
AT1G50320	Q8LD49	ATHX	Thioredoxin X, chloroplastic (AtTrxx)	-0.270356	0.169141	0.411828	0.155567	0.102104	0.170964	0.0111926	0.0642004	5	5	5	40.1	40.1	40.1	19.648	159.31	81187000	44583000	36604000	0.295303	0.101165	-0.0131622	0.210911	0.183617	0.463247	0.132404	0.554505	0.569657	0.339326	0.137706	-0.0425648	0.158899	0.301328	0.290337	-0.168447	-0.0529046	-0.143478	-0.416358	-0.57059
AT2G38550	Q9ZVH7	FAX3	Protein FATTY ACID EXPORT 3, chloroplastic (At-FAX3)	-0.0584372	0.0952671	-0.302025	-0.117254	0.613218	0.534469	0.0038484	0.0662078	5	5	5	18.2	18.2	18.2	36.701	24.209	23798000	14057000	9741500	-0.061727	-0.0850597	-0.21473	-0.0676493	-0.157106	-0.248746	-0.277512	-0.292969	-0.370296	-0.320602	NaN	NaN	-0.061156	0.264444	0.0825132	NaN	-0.13717	-0.0528177	0.0146762	NaN
AT1G09590;AT1G09690;AT1G57660;AT1G57860	Q9FDZ9;Q43291	RPL21E;RPL21A	60S ribosomal protein L21-1;60S ribosomal protein L21-2	-0.126018	-0.235065	-0.327844	-0.173083	0.240559	0.154513	0.00359236	0.0739893	5	5	5	33.5	33.5	33.5	18.709	57.758	201430000	114420000	87009000	-0.0716323	-0.0684604	-0.381116	-0.280405	-0.0637993	-0.367574	-0.397502	-0.330567	-0.281007	-0.262571	-0.19019	-0.0101016	-0.216113	-0.183717	-0.575201	-0.166868	-0.0779045	0.0365634	-0.0948849	-0.326994
AT2G39390;AT5G02610	O80626;F4KDR2;Q9LZ41	RPL35B;At5g02610;RPL35D	60S ribosomal protein L35-2;60S ribosomal protein L35-4;Ribosomal L29 family protein	-0.489201	NaN	-0.645821	-0.149113	0.419155	NaN	0.0436266	0.0762135	5	1	1	28.5	9.8	9.8	14.231	7.771	15711000	8388600	7321900	-0.235533	-0.211814	0.0369816	-0.244058	-0.0911411	-0.982263	NaN	NaN	-0.660905	-0.294295	0.966969	NaN	NaN	-0.755651	NaN	-0.526357	-1.35624	NaN	0.414995	NaN
AT5G57040	Q9LTR8	At5g57040	At5g57040 (Gb|AAD55473.1) (Lactoylglutathione lyase / glyoxalase I family protein)	-0.014938	NaN	0.508986	0.161091	0.88314	NaN	0.00908741	0.10341	5	5	5	47.2	47.2	47.2	22.247	61.262	26752000	13953000	12799000	0.382328	0.0227001	0.13559	0.00476389	0.260071	NaN	NaN	0.422956	0.580753	0.52325	-0.120958	NaN	NaN	0.129514	NaN	-0.0546634	-0.120495	0.163613	0.0593852	-0.12253
AT5G47110	Q6NKS4	LIL3;2	Light-harvesting complex-like protein 3 isotype 2, chloroplastic (LHC-like protein 3 isoform 2)	0.0271256	0.0502099	1.20686	0.319033	0.738334	0.685542	0.00840641	0.195269	5	4	4	26	23.3	23.3	28.601	119.62	29720000	11284000	18436000	-0.0320324	0.960464	NaN	0.129355	0.218345	0.860827	NaN	1.30811	NaN	1.45163	-0.107764	NaN	-0.00577159	0.171077	0.143298	-0.00302036	0.0775452	-0.0446277	-0.037101	0.142832
AT5G65840	Q8L5Y8	At5g65840	Thioredoxin superfamily protein	0.223272	0.289271	0.586852	0.168837	0.132395	0.2697	0.0103828	0.219905	5	5	5	24	24	24	29.883	38.973	21488000	11073000	10415000	NaN	0.393271	NaN	0.0775202	0.0357205	0.728125	0.547189	0.485242	NaN	NaN	0.24213	-0.00125888	NaN	NaN	0.626941	NaN	-0.000619665	0.23159	0.35363	0.308487
AT2G27720	P51407;F4IGR5;F4IGR4	RPP2A;At2g27720	60S acidic ribosomal protein family;60S acidic ribosomal protein P2-1	-0.197134	0.0538254	-0.341755	-0.0855528	0.0558103	0.663239	0.00378573	0.462561	5	3	3	67.8	57.4	57.4	11.452	323.31	126520000	69888000	56635000	-0.138163	0.148398	0.103171	-0.388128	-0.153042	-0.32183	-0.418622	-0.24533	-0.392304	-0.33069	-0.20555	0.16521	0.221818	-0.0139112	0.10156	-0.297383	-0.191028	-0.202226	-0.13338	-0.161651
AT3G09500;AT3G55170	Q9SF53;Q9M3D2	RPL35A;RPL35C	60S ribosomal protein L35-1;60S ribosomal protein L35-3	-0.242374	NaN	-0.415287	-0.0389146	0.616981	NaN	0.0373242	0.667604	5	5	1	28.5	28.5	9.8	14.285	23.362	114790000	63657000	51133000	-0.18088	-0.0332566	0.0630037	-0.209273	0.165833	-0.80658	-0.532432	-0.136489	-0.481948	-0.118985	-0.0605439	NaN	NaN	NaN	NaN	-0.166541	-1.49429	0.0790882	0.816733	-0.446858
AT4G02450	F4JHJ0;Q8L7U4	At4g02450	Co-chaperone protein p23-1 (Atp23-1) (p23 co-chaperone);HSP20-like chaperones superfamily protein	-0.206688	-0.199692	-0.313993	NaN	0.101705	0.404183	0.00584612	NaN	5	5	5	24.2	24.2	24.2	25.341	28.176	83258000	48785000	34472000	NaN	NaN	-1.1683	NaN	-0.366461	-0.319118	-0.399588	-0.235854	-0.390187	-0.225217	-0.507253	NaN	-0.180806	0.0889837	NaN	-0.18118	-0.0132618	-0.133747	-0.348873	-0.356378
AT4G11260	Q9SUT5	SGT1B	Protein SGT1 homolog B (AtSGT1b) (Protein ENHANCED DOWNY MILDEW 1) (Protein ENHANCER OF TIR1-1 AUXIN RESISTANCE 3) (Suppressor of G2 allele of SKP1 homolog B)	NaN	0.381296	-0.434302	NaN	NaN	0.296379	0.0198613	NaN	5	5	5	18.2	18.2	18.2	39.762	10.43	27121000	13733000	13388000	-0.459525	-0.227435	NaN	NaN	NaN	-0.547455	NaN	NaN	-0.30261	-0.452842	0.119922	NaN	0.937376	NaN	0.0865885	NaN	0.440787	NaN	NaN	NaN
AT5G35790	Q43727	APG1	Glucose-6-phosphate 1-dehydrogenase 1, chloroplastic (G6PD1) (G6PDH1) (EC 1.1.1.49)	0.141394	NaN	NaN	0.892503	0.661577	NaN	NaN	0.0276019	6	6	6	13.5	13.5	13.5	65.427	15.186	19378000	9893000	9485100	0.858485	NaN	1.3778	NaN	0.441224	NaN	1.71585	NaN	1.18381	NaN	0.197235	NaN	-0.356875	NaN	NaN	0.272188	-0.218749	NaN	0.815349	-0.30321
AT2G28190	O78310	CSD2	Superoxide dismutase [Cu-Zn] 2, chloroplastic (EC 1.15.1.1) (Copper/zinc superoxide dismutase 2)	0.138759	0.247723	0.186108	0.551298	0.419759	0.0729355	0.0609038	0.00414236	6	6	6	45.8	45.8	45.8	22.244	323.31	754790000	391120000	363660000	0.307578	0.54363	0.629038	0.781622	0.494623	0.23062	-0.0427651	0.178725	0.235127	0.328834	0.0905611	0.146386	0.389393	0.227381	0.384893	0.447105	0.302336	0.163863	-0.274793	0.0552832
AT2G17265	Q8L7R2	HSK	Homoserine kinase (EC 2.7.1.39) (Protein DOWNY MILDEW RESISTANT 1)	0.0178039	0.0523975	0.0401036	0.420169	0.867456	0.71655	0.739144	0.0120753	6	6	6	31.6	31.6	31.6	38.528	105.31	24393000	13262000	11131000	0.260562	0.355297	0.762157	0.431891	0.29094	0.238512	0.128172	0.232305	-0.246232	-0.152239	-0.0473096	0.299071	-0.216751	0.176543	0.0504341	0.159564	-0.0603062	-0.0357412	0.163306	-0.137803
ATCG00900;ATCG01240	P61841	rps7-A	30S ribosomal protein S7, chloroplastic	-0.147154	0.141445	0.0992461	0.330029	0.673903	0.216106	0.255316	0.00893148	6	6	6	40.6	40.6	40.6	17.357	103.2	350260000	185180000	165080000	0.206147	0.50604	0.339266	0.208406	0.390287	-0.00871357	-0.0747507	0.19261	0.110939	0.276146	0.174866	NaN	0.147455	0.225734	0.0177264	-0.162775	0.220714	0.237746	0.153264	-1.18472
AT5G45170	Q6NMA9	At5g45170	At5g45170 (Haloacid dehalogenase-like hydrolase (HAD) superfamily protein)	0.0847297	0.148174	NaN	0.254407	0.52363	0.172252	NaN	0.0120753	6	6	6	25.8	25.8	25.8	40.741	38.107	21123000	11428000	9695500	0.23991	0.311774	NaN	0.254247	0.211697	NaN	NaN	NaN	NaN	NaN	0.0978997	0.0210959	0.12687	0.177259	0.317743	0.317602	-0.111629	0.265674	0.0722564	-0.120255
AT4G21860	Q9C5C8;Q9C5C8-2	MSRB2	Peptide methionine sulfoxide reductase B2, chloroplastic (AtMSRB2) (EC 1.8.4.12) (Peptide-methionine (R)-S-oxide reductase)	0.0771934	0.00883098	0.357646	0.246494	0.779232	0.960017	0.270585	0.0192171	6	6	6	38.6	38.6	38.6	21.968	114.66	66069000	36611000	29458000	0.221701	NaN	0.147485	0.276695	0.340096	NaN	-0.0801412	0.11419	1.19368	0.202854	0.364905	-0.207053	0.0894629	0.1084	-0.31156	0.194724	-0.702671	0.124599	0.370123	0.399192
AT4G39960	Q940V1	At4g39960	AT4g39960/T5J17_130 (Molecular chaperone Hsp40/DnaJ family protein)	0.147759	NaN	0.0744831	0.189825	0.0936923	NaN	0.257107	0.0316579	6	4	4	16.3	13.9	13.9	48.031	28.909	21909000	11604000	10306000	0.0124472	0.278718	0.20666	0.169625	0.281677	-0.0160631	0.14211	-0.0226075	0.179555	0.0894209	0.339843	NaN	NaN	NaN	NaN	0.0622225	0.206467	0.149004	0.196234	0.124866
ATCG00780	P56792	rpl14	50S ribosomal protein L14, chloroplastic	0.0496317	0.197793	0.044606	0.176493	0.581669	0.0729355	0.326604	0.0260571	6	6	6	59	59	59	13.582	187.26	321890000	166980000	154910000	0.0888312	0.292677	0.230605	0.128937	0.141413	0.0582048	0.0202447	0.0386223	0.041084	0.0648741	0.30489	0.230776	0.218713	0.135438	0.0991457	-0.100502	0.0190635	0.160597	0.151182	0.0178179
AT5G38660	Q2HIR7;F4KBK9	APE1	Acclimation of photosynthesis to environment (At5g38660)	0.0817996	0.154662	0.103518	0.141962	0.487374	0.168312	0.101408	0.0225825	6	6	6	25.2	25.2	25.2	31.437	58.552	82400000	42609000	39791000	0.147565	0.11189	0.156799	0.13353	0.160027	0.00265722	0.189952	0.0849936	0.109835	0.130152	0.169054	0.275008	-0.00590611	0.233556	0.101598	0.190284	-0.0420692	-0.162495	0.197169	0.226109
AT1G48830	Q9C514	RPS7A	40S ribosomal protein S7-1	0.0514867	-0.158742	-0.151009	-0.165904	0.678596	0.223681	0.0563791	0.0220239	6	6	6	48.2	48.2	48.2	21.922	181.49	145520000	83658000	61860000	-0.227667	-0.217473	-0.0890756	-0.133016	-0.16229	-0.1899	-0.20644	-0.241599	-0.00533453	-0.111769	-0.281094	0.0157126	-0.380274	-0.0290486	-0.119006	-0.0370729	0.153607	0.0506025	0.288103	-0.197806
AT2G21620	Q9SIJ8;Q94II5	RD2	Adenine nucleotide alpha hydrolases-like superfamily protein (Expressed protein) (RD2 protein);Adenine nucleotide alpha hydrolases-like superfamily protein (RD2 protein)	-0.20889	-0.240501	-0.157086	-0.225515	0.0508234	0.101581	0.0905443	0.0101062	6	6	6	42.8	42.8	42.8	20.587	20.39	28683000	16965000	11718000	-0.182743	-0.303729	-0.179546	-0.177185	-0.284373	NaN	-0.143708	-0.184049	-0.143502	NaN	-0.231456	-0.127757	-0.412093	-0.0425593	-0.388639	-0.201597	-0.154977	-0.199596	-0.168132	-0.320148
AT2G19760	Q42449	PRO1	Profilin-1 (allergen Ara t 8)	0.0698718	-0.205921	-0.159826	-0.238415	0.595769	0.0703132	0.0628948	0.0187294	6	6	5	85.5	85.5	79.4	14.266	92.836	116780000	63646000	53136000	-0.247829	-0.228787	-0.26443	-0.387809	-0.0632183	-0.167934	-0.255773	-0.0905423	-0.00877288	-0.27611	-0.210465	-0.311064	-0.105144	-0.190869	-0.212061	-0.09273	0.173886	0.182071	-0.191367	0.277499
AT1G61520	Q9SY97-2;Q9SY97	T25B24.12	Photosystem I chlorophyll a/b-binding protein 3-1, chloroplastic (Lhca3*1) (LHCI type III LHCA3)	-0.211789	0.268722	-0.172354	-0.252708	0.157447	0.359913	0.121057	0.0276019	6	6	6	33.9	33.9	33.9	23.746	323.31	2255700000	1280600000	975180000	-0.281095	-0.334624	-0.446638	-0.0368101	-0.164372	-0.427059	0.036636	-0.153166	-0.254624	-0.0635545	0.909741	0.615352	-0.166258	0.0432857	-0.0585098	-0.183709	0.108597	-0.251719	-0.462541	-0.269571
AT5G40370	Q9FNE2;B3H604	GRXC2;At5g40370	Glutaredoxin family protein;Glutaredoxin-C2 (AtGrxC2)	-0.169211	-0.227162	-0.0698582	-0.368004	0.337054	0.57559	0.555589	0.00868522	6	6	6	63.1	63.1	63.1	11.756	236.66	76445000	47757000	28688000	-0.380334	-0.478764	-0.531592	-0.172641	-0.276689	0.177616	0.122422	-0.124725	-0.153709	-0.370895	0.640266	NaN	-0.834493	-0.120265	-0.594154	-0.426811	-0.501648	0.0981759	0.0736229	-0.0893964
AT1G15930	Q9S9P1	RPS12A	40S ribosomal protein S12-1	-0.150838	-0.0892108	-0.216958	-0.37161	0.0893358	0.543083	0.214194	0.0027084	6	6	4	42.4	42.4	29.9	15.377	199.95	229280000	136090000	93185000	-0.359343	-0.352183	-0.327188	-0.491844	-0.327492	-0.302253	-0.459558	-0.30438	0.342677	-0.361278	-0.285409	NaN	-0.145306	-0.109145	0.183017	-0.0647047	-0.140406	-0.209783	-0.174827	-0.164467
AT1G31330	Q9SHE8	PSAF	Photosystem I reaction center subunit III, chloroplastic (Light-harvesting complex I 17 kDa protein) (PSI-F)	-0.260975	-0.0778595	-0.153379	-0.379405	0.110737	0.856305	0.0517934	0.0051176	6	6	6	35.7	35.7	35.7	24.173	323.31	1780100000	1038600000	741440000	-0.271761	-0.485554	-0.527265	-0.302101	-0.310344	-0.223812	-0.0438651	-0.0794068	-0.255473	-0.164338	-0.0911723	1.01419	-0.323	-0.493463	-0.495852	-0.226453	-0.0560886	-0.101687	-0.605857	-0.314791
AT3G28940	Q9MBH2	At3g28940	Protein AIG2 B (EC 2.3.2.-) (Avirulence-induced gene 2 protein B) (Putative gamma-glutamylcyclotransferase)	-0.0633558	-0.260208	-0.227184	-0.4114	0.77404	0.104225	0.224864	0.0166164	6	6	6	41.4	41.4	41.4	19.465	132.35	53683000	31706000	21977000	-0.173034	-0.714211	-0.582542	-0.336088	-0.251127	-0.377538	0.0838944	NaN	NaN	-0.387908	-0.245094	-0.378528	-0.294216	0.0446875	-0.427889	-0.286783	-0.211961	-0.116512	0.563474	-0.264997
AT2G42220	O48529	STR9	Rhodanese-like domain-containing protein 9, chloroplastic (Sulfurtransferase 9) (AtStr9)	-0.0607171	0.0096219	0.177242	0.138592	0.582297	0.928802	0.0381153	0.111372	6	6	6	45.3	45.3	45.3	25.51	168.2	108800000	60563000	48239000	0.0905182	0.185609	-0.0552057	0.154638	0.317402	0.139691	0.341466	0.158928	0.0866168	0.15951	0.024513	NaN	-0.0141344	0.141547	-0.113438	-0.0985184	0.0647829	-0.193973	-0.212297	0.13642
AT3G23490	O22683	CYN	Cyanate hydratase (Cyanase) (EC 4.2.1.104) (Cyanate hydrolase) (Cyanate lyase)	-0.250933	-0.233239	0.44709	0.277	0.319061	0.46855	0.00226193	0.130073	6	6	6	60.7	60.7	60.7	18.592	106.4	73170000	50057000	23112000	0.508667	0.484376	-0.14597	NaN	0.260927	0.378136	0.482626	0.527001	0.454159	0.39353	-0.244761	0.0523076	-1.16739	0.02255	0.1711	0.0553758	-0.0100909	-0.117154	-0.223319	-0.959478
AT2G04039	F4IUA0;Q93Z84;A8MR59	At2g04039	At2g04039/At2g04039 (DUF2996 family protein) (Predicted protein);DUF2996 family protein	-0.0477658	0.215439	0.247909	0.138241	0.580222	0.272393	0.0114697	0.133137	6	6	6	45.5	45.5	45.5	18.335	153.82	65801000	34318000	31482000	0.309293	0.141804	-0.0695364	0.0608967	0.24875	0.360838	0.263463	0.223553	0.125286	0.266405	-0.0545538	0.0671967	0.0210111	0.64139	0.402149	0.00253493	-0.0402875	0.0731229	-0.0901313	-0.184068
AT3G10520	O24521	AHB2	Non-symbiotic hemoglobin 2 (ARAth GLB2) (Hb2)	-0.294359	0.122653	0.1257	0.0897796	0.240594	0.170964	0.0470765	0.153877	6	6	6	53.2	53.2	53.2	17.871	153.27	90848000	52339000	38509000	-0.0267593	0.17878	0.0465965	0.137416	0.112865	0.156026	0.124417	0.131554	0.170104	0.0463995	0.128381	0.154573	0.0677717	0.0640227	0.198519	-0.640267	0.123169	0.0988984	-0.343113	-0.710484
AT3G04230;AT5G18380	A8MRX2;Q42340;F4JWM1;Q9M8X9	At5g18380;RPS16C;RPS16B	40S ribosomal protein S16-2;40S ribosomal protein S16-3;Ribosomal protein S5 domain 2-like superfamily protein	-0.156153	-0.0293227	-0.416744	-0.192911	0.199736	0.800008	0.00333296	0.165969	6	6	1	47.9	47.9	6.9	16.544	152.92	290630000	165270000	125350000	0.199471	-0.165363	-0.184765	-0.499539	-0.314358	-0.528626	-0.404903	-0.42936	-0.444425	-0.276406	-0.112927	0.0575564	-0.10572	0.162461	-0.147984	-0.42019	-0.165806	-0.0189478	-0.0374259	-0.138394
AT5G23540	Q9LT08;A8MR12	RPN11;At5g23540	26S proteasome non-ATPase regulatory subunit 14 homolog (EC 3.4.19.-) (26S proteasome regulatory subunit RPN11) (AtRPN11);Mov34/MPN/PAD-1 family protein	-0.085402	-0.0324144	-0.229277	-0.0799954	0.372493	0.861626	0.0356617	0.318822	6	6	6	30.8	30.8	30.8	34.353	52.47	20067000	11741000	8326000	-0.0229728	-0.0910023	NaN	NaN	-0.126011	-0.239278	-0.371893	-0.346123	-0.153067	-0.0360235	0.0399638	NaN	-0.238995	NaN	0.101788	NaN	0.0132198	-0.178465	-0.0733218	-0.103041
AT1G27400;AT1G67430	Q93VI3;P51413;F4HRW5	RPL17A;RPL17B;At1g67430	60S ribosomal protein L17-1;60S ribosomal protein L17-2;Ribosomal protein L22p/L17e family protein	-0.405522	-0.235351	-0.605	-0.195529	0.0805122	0.237883	0.0218709	0.329545	6	6	6	41.5	41.5	41.5	19.897	68.666	181030000	114080000	66948000	-0.0532971	-0.115679	-0.00424796	0.0813149	-0.885737	-0.854066	-0.833108	-0.0425082	-0.834927	-0.460393	-0.190585	NaN	0.0337603	-0.200269	-0.58431	-0.479019	-0.846822	-0.154686	-0.0879806	-0.459103
AT2G30620	P26569;F4INW2	At2g30620	Histone H1.2;Winged-helix DNA-binding transcription factor family protein	-0.135757	NaN	-0.480731	-0.0823431	0.454687	NaN	0.0367091	0.388673	6	6	6	24.5	24.5	24.5	28.487	20.144	16379000	8858400	7520200	-0.0483533	-0.215144	0.201701	-0.16329	-0.186629	-0.611631	-0.224523	NaN	-0.60604	NaN	-0.116195	NaN	NaN	NaN	NaN	-0.0438784	-0.46674	-0.194802	0.162392	NaN
AT5G66680	Q944K2	OST48	Dolichyl-diphosphooligosaccharide--protein glycosyltransferase 48 kDa subunit (Oligosaccharyl transferase 48 kDa subunit) (EC 2.4.99.18) (Protein DEFECTIVE GLYCOSYLATION 1)	-0.228573	NaN	-0.283655	-0.0537909	0.0936923	NaN	0.00657033	0.532322	6	6	6	16	16	16	48.744	68.711	22572000	12766000	9805500	0.0127728	NaN	NaN	-0.0271774	-0.146968	-0.160404	-0.348162	-0.328431	-0.270814	-0.310463	NaN	NaN	-0.0868184	-0.133246	NaN	-0.0774911	-0.275303	-0.265168	-0.457213	-0.0676889
AT4G02930	Q9ZT91	TUFA	Elongation factor Tu, mitochondrial	0.11219	0.0704104	0.176582	-0.0629417	0.427104	0.433799	0.0356299	0.546042	6	5	5	23.6	20.3	20.3	49.409	37.165	23132000	12719000	10413000	-0.00493443	-0.140399	-0.259683	0.23326	-0.142952	0.0395837	0.246772	0.174228	0.271111	0.151213	-0.0262799	0.012944	0.207968	0.120751	0.0366691	NaN	-0.141194	0.143113	0.301646	0.145194
AT1G23290;AT1G70600	Q9LR33;P49637	RPL27AB;RPL27AC	60S ribosomal protein L27a-2;60S ribosomal protein L27a-3	-0.0651566	-0.278519	-0.264453	-0.0676644	0.581669	0.0571585	0.0178846	0.567477	6	6	6	44.5	44.5	44.5	16.292	89.593	318400000	179510000	138890000	0.250917	-0.0581109	-0.367067	-0.127077	-0.0369841	-0.311481	-0.322333	-0.362032	-0.0526582	-0.273759	-0.224599	-0.153169	-0.235585	-0.334114	-0.44513	-0.138795	-0.0335079	0.061181	0.106806	-0.321467
AT3G53420	P43286	PIP2-1	1) (Plasma membrane intrinsic protein 2a) (PIP2a);Aquaporin PIP2-1 (Plasma membrane intrinsic protein 2-1) (AtPIP2	-0.102187	-0.0276615	-0.170493	-0.0430711	0.264854	0.830247	0.0182084	0.590918	6	6	4	18.1	18.1	11.5	30.474	74.659	319230000	174360000	144860000	-0.153325	0.179049	-0.144448	-0.0336857	-0.0629459	-0.245795	-0.137635	-0.14066	-0.160245	-0.16813	0.0263603	NaN	-0.172192	0.114499	-0.0793133	-0.148719	-0.168786	-0.109391	-0.153751	0.0697123
AT1G17880	Q9SMW7	btf3	Basic transcription factor 3 (AtBTF3) (Nascent polypeptide-associated complex subunit beta)	-0.10468	-0.217082	-0.150353	-0.118929	0.308789	0.167421	0.043821	0.609634	6	5	5	62.4	62.4	62.4	17.946	186.31	66733000	38966000	27767000	0.0388365	-0.576329	NaN	NaN	0.180706	-0.181755	-0.197843	-0.0755585	-0.232097	-0.0645104	-0.317379	-0.318089	-0.213905	0.119049	-0.355088	-0.109222	-0.157189	-0.118423	0.107688	-0.246252
AT1G14150	Q9XI73;Q9XI73-2	PNSL2	Photosynthetic NDH subunit of lumenal location 2, chloroplastic (PsbQ-like protein 1)	-0.0740574	0.0751477	0.13262	-0.0111564	0.78194	0.548198	0.040758	0.901922	6	6	6	44.2	44.2	44.2	22.157	54.135	63647000	32827000	30820000	-0.0676574	0.0278207	-0.25075	0.0672839	0.167521	0.14639	0.10997	0.107829	0.20874	0.0901726	0.242967	NaN	-0.115251	0.0376839	0.135191	-0.121665	0.357065	0.254954	-0.105435	-0.755206
AT2G31670	Q9SIP1	At2g31670	Stress-response A/B barrel domain-containing protein UP3 (Unknown protein 3)	-0.0263806	0.243935	0.579007	0.0127222	0.910625	0.484906	0.00485346	0.935533	6	6	6	37.6	37.6	37.6	28.865	49.956	32483000	17677000	14806000	0.264614	-0.477981	-0.158036	0.251688	0.183326	0.505543	0.529734	0.773725	NaN	0.507026	0.265232	0.200801	0.931418	-0.42171	NaN	-0.622	0.14415	0.32141	0.18952	-0.164983
AT3G13490	Q9LJE2	OVA5	Lysine--tRNA ligase, chloroplastic/mitochondrial (EC 6.1.1.6) (Lysyl-tRNA synthetase) (LysRS) (Lysyl-tRNA synthetase 2) (AtKRS-2) (Protein OVULE ABORTION 5)	-0.242737	NaN	-0.501098	NaN	0.0936923	NaN	0.00627832	NaN	6	6	6	16.6	16.6	16.6	67.587	13.688	8989900	4976600	4013300	NaN	-0.523967	NaN	NaN	-0.649807	-0.331857	-0.494688	NaN	-0.553467	-0.62438	NaN	NaN	NaN	-0.284643	NaN	-0.297721	-0.227185	NaN	-0.377608	-0.0684333
AT1G62480	Q9SXE9	At1g62480	At1g62480/T3P18_4 (T3P18.4) (Vacuolar calcium-binding protein-like protein)	-0.496832	NaN	-0.548726	NaN	0.111809	NaN	0.00797633	NaN	6	6	6	73	73	73	16.628	180.85	13180000	8500000	4679900	NaN	NaN	NaN	NaN	NaN	-0.699221	-0.622504	-0.325478	NaN	-0.547699	NaN	-1.02166	NaN	NaN	NaN	-0.385759	-1.03608	-0.906677	-0.158828	0.00318316
AT3G47370	Q9STY6	RPS20B	40S ribosomal protein S20-2	NaN	NaN	-0.252096	NaN	NaN	NaN	0.0122933	NaN	6	2	2	59.8	17.2	17.2	13.693	5.887	18532000	10146000	8386300	-0.0309137	NaN	NaN	NaN	-0.197071	-0.279304	-0.223165	-0.283672	NaN	-0.222243	NaN	NaN	NaN	NaN	NaN	NaN	-0.371471	NaN	-0.0852643	NaN
AT3G19760	Q94A52	RH2	Eukaryotic initiation factor 4A-III homolog (AteIF4AIII) (eIF-4A-III) (eIF4A-III) (EC 3.6.4.13) (DEAD-box ATP-dependent RNA helicase 2) (AtRH02)	NaN	NaN	-0.387257	NaN	NaN	NaN	0.0164841	NaN	6	4	4	14.7	12.3	12.3	45.844	10.99	6058400	3337600	2720800	NaN	NaN	NaN	NaN	NaN	-0.534062	NaN	-0.233667	-0.497875	-0.283424	-0.0464578	NaN	-0.77474	NaN	NaN	-2.05543	NaN	NaN	NaN	-0.944809
AT4G38460	Q39108	GGPPS12	Heterodimeric geranylgeranyl pyrophosphate synthase small subunit, chloroplastic	0.0464866	0.51826	NaN	0.551528	0.495108	0.0703132	NaN	0.0101062	7	7	7	33.4	33.4	33.4	35.188	30.728	28703000	15205000	13499000	0.702558	0.454199	NaN	NaN	0.497827	NaN	NaN	0.508328	0.517837	NaN	0.245195	0.348333	0.605798	NaN	0.873715	0.0470204	0.0615899	0.10154	0.0009619	0.0213209
AT3G48110	Q8L785-2;Q8L785	GLYRS-2	Glycine--tRNA ligase, chloroplastic/mitochondrial 2 (EC 6.1.1.14) (Glycyl-tRNA synthetase 2) (GlyRS-2) (Protein EMBRYO-DEFECTIVE-DEVELOPMENT 1)	0.065619	0.111063	0.181387	0.225254	0.461461	0.361495	0.184618	0.0124301	7	7	7	10	10	10	119.67	27.567	14660000	7963700	6696200	0.27623	0.251794	0.283838	0.222848	0.0915585	NaN	0.307381	-0.134661	0.261794	0.291035	0.147805	0.0828582	NaN	0.102525	NaN	0.125585	0.0469792	0.00600427	0.21386	-0.0643333
AT3G18820	Q9LS94	RABG3F	Ras-related protein RABG3f (AtRABG3f) (Ras-related protein Rab71) (AtRab71) (Ras-related protein Rab7B) (AtRab7B)	-0.167071	-0.111915	NaN	0.161332	0.217157	0.471705	NaN	0.0253865	7	7	2	48.1	48.1	21.8	23.102	16.434	13194000	7129700	6063800	0.212907	0.119042	0.146872	0.0863494	0.241492	NaN	NaN	NaN	NaN	NaN	NaN	NaN	-0.282047	0.0433605	-0.0970597	-0.243744	-0.076413	-0.181057	NaN	NaN
AT5G43780	Q9S7D8	APS4	ATP sulfurylase 4, chloroplastic (EC 2.7.7.4)	NaN	NaN	NaN	-0.197292	NaN	NaN	NaN	0.0281885	7	4	4	21.7	15.6	15.6	52.125	21.277	4568300	2633400	1934900	NaN	-0.22548	-0.100855	-0.261989	-0.200842	NaN	NaN	NaN	NaN	NaN	NaN	NaN	NaN	-0.0110931	-0.104733	NaN	NaN	NaN	NaN	NaN
AT5G23010	Q9FG67	MAM1	Methylthioalkylmalate synthase 1, chloroplastic (EC 2.3.3.17) (2-isopropylmalate synthase 3)	NaN	-0.251983	NaN	-0.23598	NaN	0.266334	NaN	0.0134013	7	7	7	20.6	20.6	20.6	55.124	102.8	12212000	8430500	3782000	-0.161504	-0.260739	-0.232118	-0.147651	-0.377888	NaN	NaN	NaN	NaN	NaN	-0.666714	0.256519	-0.152479	-0.27832	-0.418922	NaN	NaN	NaN	NaN	-0.334696
AT3G24830	Q9LRX8	RPL13AB	60S ribosomal protein L13a-2	0.0874769	-0.184686	-0.130563	-0.238958	0.473833	0.386516	0.0877464	0.00938052	7	5	4	36.9	24.3	20.4	23.459	27.988	125620000	69941000	55681000	-0.155225	-0.345586	-0.245399	-0.237716	-0.210864	-0.233901	-0.195135	-0.153639	-0.0861803	0.0160421	0.0221762	NaN	-0.5906	0.050932	-0.221251	-0.14948	0.173604	0.0284838	0.342856	0.0419209
AT4G28750	Q9S831	PSAE1	Photosystem I reaction center subunit IV A, chloroplastic (PSI-E A)	-0.0970719	-0.511726	-0.0890927	-0.346855	0.718015	0.111025	0.737979	0.00680254	7	7	5	51.7	51.7	37.1	14.967	323.31	1309400000	743020000	566410000	-0.418859	-0.371511	-0.24815	-0.212608	-0.483148	-0.157382	0.712658	0.0935143	-0.539905	-0.554349	0.0819232	-0.814289	-0.291377	-0.530417	-1.00447	0.0755426	-0.793478	-0.283965	0.22276	0.293781
AT2G34460	Q8H124		Uncharacterized protein At2g34460, chloroplastic	-0.126828	-0.0179939	-0.323011	-0.381125	0.305348	0.890129	0.162137	0.00567797	7	7	7	40.4	40.4	40.4	30.471	196.03	36179000	19292000	16887000	-0.266353	-0.348407	-0.279316	-0.453386	-0.558162	-0.11293	-0.475054	NaN	-0.777091	0.0730305	0.160742	NaN	-0.0307329	-0.200292	-0.00169283	-0.0261386	-0.130564	0.0902031	-0.202733	-0.364905
AT5G42980	Q42403	TRX3	Thioredoxin H3 (AtTrxh3) (Thioredoxin 3) (AtTRX3)	-0.4753	-0.267491	-0.283073	-0.401895	0.0673108	0.125191	0.101935	0.00720298	7	7	7	72.9	72.9	72.9	13.109	284.39	287730000	168270000	119460000	-0.332712	-0.189935	-0.42256	-0.49253	-0.571737	-0.118352	-0.497431	0.15429	-0.470769	-0.483104	-0.164953	-0.115649	-0.088669	-0.604595	-0.363587	-0.496471	-0.129451	-0.32728	-0.39971	-1.02359
AT4G03520	Q9SEU8;F4JG94	ATHM2	Thioredoxin M2, chloroplastic (AtTrxm2);Thioredoxin superfamily protein	-0.0525097	0.137743	0.276052	0.153725	0.47698	0.166317	0.00469726	0.114386	7	7	7	44.1	44.1	44.1	20.312	313.43	413140000	217400000	195740000	0.242336	0.171514	-0.0202761	0.0126134	0.362439	0.209815	0.275624	0.314384	0.289535	0.290901	0.168042	0.0474455	0.0608534	0.229552	0.18282	-0.0874564	0.0331976	-0.0723298	-0.125519	-0.0104408
AT2G44920	O22160;O22160-2		Thylakoid lumenal 15 kDa protein 1, chloroplastic (p15)	0.0280723	0.0818963	0.122228	0.118152	0.783147	0.394336	0.0453268	0.127422	7	7	7	42.4	42.4	42.4	23.778	233.9	151690000	71958000	79728000	-0.0323011	0.131161	0.0387996	0.201396	0.251702	0.0922041	0.121371	0.184999	0.119281	0.0932829	0.24227	0.0762428	0.103121	-0.0280856	0.0159333	-0.0103745	-0.133436	0.0816416	-0.0132526	0.215783
AT5G03290	Q945K7	IDH5	Isocitrate dehydrogenase [NAD] catalytic subunit 5, mitochondrial (EC 1.1.1.41) (IDH-V) (Isocitric dehydrogenase 5) (NAD(+)-specific ICDH 5)	-0.272215	-0.346172	-0.354535	-0.196071	0.280813	0.218359	0.0220859	0.241609	7	7	6	29.9	29.9	28.1	40.624	76.72	36028000	16951000	19077000	-0.298087	-0.554678	0.0416596	0.230664	-0.399916	-0.301011	-0.410162	-0.324014	-0.0969334	-0.640554	-0.412758	-0.338892	-0.268349	0.244642	-0.955503	-0.588593	-0.574579	NaN	-0.0322348	0.106548
AT5G27850	Q940B0	RPL18C	60S ribosomal protein L18-3	-0.0432191	-0.103425	-0.233394	-0.0492199	0.785127	0.323262	0.0208633	0.319429	7	7	1	39.6	39.6	5.9	20.967	95.518	533870000	301670000	232200000	-0.0253326	-0.01558	-0.0262728	-0.101041	-0.0778732	-0.146349	-0.35944	-0.319655	-0.23395	-0.107576	-0.107818	0.054194	-0.296287	-0.0753973	-0.091815	0.00412558	0.118274	0.0387925	0.0951756	-0.472463
AT3G06510	Q93Y07;Q93Y07-2	SFR2	Galactolipid galactosyltransferase SFR2, chloroplastic (EC 2.4.1.184) (Galactolipid:galactolipid galactosyltransferase) (GGGT) (Protein SENSITIVE TO FREEZING 2) (AtSFR2)	0.291482	0.238818	0.480214	0.0819753	0.145633	0.114585	0.0409838	0.409997	7	7	7	16.4	16.4	16.4	70.778	34.179	15046000	7560800	7485000	0.175497	-0.00226543	-0.180763	0.131305	0.286103	0.335743	0.354138	0.750762	NaN	NaN	0.0906075	NaN	0.374487	0.16394	0.326239	0.177395	0.132198	0.191789	0.664546	NaN
AT1G11750	F4IAG5;Q9SAA2	CLPP6	ATP-dependent Clp protease proteolytic subunit 6, chloroplastic (EC 3.4.21.92) (Endopeptidase ClpP6) (nClpP6) (nClpP1);ATP-dependent Clp protease proteolytic subunit	-0.250123	0.266786	-0.384773	-0.118983	0.0895679	0.111025	0.0221227	0.423832	7	7	7	35.6	35.6	35.6	31.313	85.071	87566000	46024000	41542000	-0.282799	-0.341018	0.0705635	0.292714	-0.334377	0.00240588	-0.463521	-0.445375	-0.505086	-0.512289	0.223182	0.609407	0.218829	0.189696	0.0928139	-0.273751	-0.122102	-0.047619	-0.502604	-0.304537
AT3G53430	Q9LFH5	RPL12B	60S ribosomal protein L12-2 (ABI1-binding protein 11)	-0.147117	-0.058946	-0.382096	-0.0318704	0.308789	0.476059	0.0125203	0.524698	7	7	1	52.4	52.4	9.6	17.97	323.31	296120000	170400000	125720000	0.0140958	-0.0454656	-0.00149012	-0.0908093	-0.035683	-0.504045	-0.224344	-0.16465	-0.540715	-0.476728	-0.148425	0.00363041	0.0220669	-0.135276	-0.0367261	-0.0855998	0.014337	-0.114479	-0.0291242	-0.52072
AT3G55040	Q9M2W2	GSTL2	Glutathione S-transferase L2, chloroplastic (AtGSTL2) (EC 2.5.1.18) (GST class-lambda member 2)	0.00138548	0.120081	0.201346	0.0296943	0.994618	0.249732	0.0104908	0.624343	7	7	7	37.7	37.7	37.7	33.057	95.312	58638000	29196000	29442000	-0.112539	0.098046	0.040762	0.0646916	0.057511	0.264817	0.165414	0.202383	0.191691	0.182425	0.0357546	0.298616	0.0203509	0.0766302	0.169053	0.301139	0.201916	0.195531	-0.0582016	-0.633457
AT4G10480	A8MQP6;Q9SZY1	At4g10480	Nascent polypeptide-associated complex (NAC), alpha subunit family protein;Nascent polypeptide-associated complex subunit alpha-like protein 4 (NAC-alpha-like protein 4) (Alpha-NAC-like protein 4)	0.00130029	0.153299	-0.916182	-0.0338424	0.991261	0.452126	0.0209048	0.658924	7	7	6	38.9	38.9	38.9	23.114	40.465	52706000	32074000	20632000	0.148158	-0.0268192	-0.199692	-0.0671861	-0.0236727	-1.57957	-0.227443	-0.5856	-1.28918	-0.899115	0.0110898	NaN	0.587996	0.0692479	-0.0551386	-0.216319	-0.00769329	-0.00447627	0.132924	0.102066
AT2G27710	Q9SLF7;F4IGR3	RPP2B;At2g27710	60S acidic ribosomal protein family;60S acidic ribosomal protein P2-2	-0.164686	-0.016765	-0.176237	-0.00214616	0.230174	0.852855	0.0399681	0.973331	7	7	5	70.4	70.4	60	11.444	323.31	482640000	265270000	217370000	0.0189656	-0.0235108	-0.138397	0.149837	-0.0176256	-0.0689815	-0.296772	-0.166636	-0.252241	-0.0965532	-0.000841439	0.0272828	0.0541599	-0.0867705	-0.077656	-0.136438	-0.246994	-0.033448	0.0445805	-0.451129
AT4G17530;AT5G47200	Q9SEH3;Q9FPJ4	RABD2C;RABD2B	Ras-related protein RABD2b (AtRABD2b) (Ras-related protein Rab1A) (AtRab1A);Ras-related protein RABD2c (AtRABD2c) (Ras-related protein Rab1C) (AtRab1C)	-0.0386266	NaN	-0.253438	NaN	0.635028	NaN	0.0267257	NaN	7	7	6	50.5	50.5	45	22.318	166.89	55218000	33317000	21901000	NaN	NaN	NaN	NaN	-0.502912	-0.165813	-0.173926	-0.382357	-0.119789	-0.425306	0.29215	NaN	-0.202823	NaN	NaN	0.0287856	-0.107515	-0.0834148	-0.113556	0.0825671
AT1G10840	Q9C5Z2;Q9C5Z2-2	TIF3H1	Eukaryotic translation initiation factor 3 subunit H (eIF3h) (Eukaryotic translation initiation factor 3 subunit 3) (eIF-3-gamma) (eIF3 p38 subunit)	-0.256503	NaN	-0.210011	NaN	0.142014	NaN	0.0360003	NaN	7	7	7	29.1	29.1	29.1	38.372	17.586	16786000	9173500	7612500	NaN	NaN	NaN	NaN	NaN	-0.324035	-0.198084	NaN	-0.122403	-0.195522	-0.162127	NaN	NaN	-0.173489	NaN	-0.186926	0.0270679	-0.290836	-0.18418	-0.647641
AT2G46280	Q38884	TIF3I1	Eukaryotic translation initiation factor 3 subunit I (eIF3i) (Eukaryotic translation initiation factor 3 subunit 2) (TGF-beta receptor-interacting protein 1) (TRIP-1) (eIF-3-beta) (eIF3 p36)	-0.0917881	NaN	0.186012	NaN	0.450966	NaN	0.0459979	NaN	7	7	7	38.4	38.4	38.4	36.388	82.468	41602000	24277000	17325000	NaN	NaN	NaN	NaN	NaN	0.245963	0.121844	0.260453	NaN	0.115789	-0.406208	NaN	NaN	NaN	NaN	-0.135383	-0.386988	0.00777362	0.0117795	0.0438774
AT5G14320	P42732;B3H631	RPS13;At5g14320	30S ribosomal protein S13, chloroplastic (CS13);Ribosomal protein S13/S18 family	-0.236742	0.255082	0.275073	0.537509	0.477015	0.17739	0.0954433	0.0253516	8	8	8	40.8	40.8	40.8	19.096	70.836	161240000	88683000	72560000	0.800712	0.31153	NaN	NaN	0.500286	0.127064	0.336568	0.704686	-0.0195856	0.226631	0.485486	0.394054	0.00668225	0.134104	NaN	-0.0908666	-0.735251	0.237606	0.345811	-0.941008
AT3G54640	Q42529	TSA1	Tryptophan synthase alpha chain, chloroplastic (EC 4.2.1.20) (Indole-3-glycerol-phosphate lyase, chloroplastic) (EC 4.1.2.8) (Protein TRYPTOPHAN-REQUIRING 3)	-0.0084317	0.0526982	NaN	0.403998	0.954104	0.768684	NaN	0.0232623	8	8	8	54.2	54.2	54.2	33.199	74.894	15842000	8860700	6981400	NaN	0.421563	NaN	0.548012	0.242418	0.191464	NaN	NaN	NaN	NaN	-0.104445	-0.278394	0.149751	0.114232	0.382347	NaN	0.156745	NaN	-0.0730911	-0.108949
AT3G49010	A8MQA1;P41127;F4IWP7	BBC1;RPL13B	60S ribosomal protein L13;60S ribosomal protein L13-1 (Protein BBC1 homolog);Breast basic conserved 1	-0.123509	-0.108781	-0.063364	0.269136	0.536278	0.585711	0.615042	0.0253516	8	8	5	44.1	44.1	32.8	23.539	268.53	365250000	205320000	159940000	0.373719	0.289449	0.306851	-0.0119713	0.387632	-0.328988	-0.126397	0.100169	-0.215329	0.253725	-0.149083	0.108502	0.105613	0.0489777	-0.657915	-0.25706	-0.596678	-0.0485551	0.309256	-0.0245071
AT2G04842	F4IFC5	EMB2761	Threonine--tRNA ligase, chloroplastic/mitochondrial 2 (EC 6.1.1.3) (Protein EMBRYO DEFECTIVE 2761) (Threonyl-tRNA synthetase) (ThrRS)	0.00439639	0.16354	0.122335	-0.133106	0.972869	0.194769	0.34205	0.0301983	8	8	8	19.5	19.5	19.5	74.784	58.36	33275000	18766000	14509000	-0.124256	-0.160702	-0.0813558	-0.125463	-0.173751	-0.0378218	NaN	0.268677	0.337651	-0.0791658	0.270574	NaN	0.0106768	0.185856	0.187052	0.0218118	-0.226162	0.0505867	-0.00481957	0.180565
AT4G12730	Q9SU13	FLA2	Fasciclin-like arabinogalactan protein 2	0.118277	-0.0205351	-0.0460267	-0.174119	0.221502	0.881458	0.705392	0.0456308	8	8	8	36.7	36.7	36.7	43.448	248.26	88465000	48888000	39577000	-0.193092	-0.0925889	NaN	-0.273092	-0.137703	0.248482	-0.0143006	0.0282952	-0.12412	-0.36849	0.122091	NaN	0.0803694	-0.216678	-0.0679229	0.0517583	0.0433458	0.0900948	0.309315	0.0968707
AT1G60710	Q93ZN2		Probable aldo-keto reductase 4 (EC 1.1.1.-)	-0.0506816	0.106989	0.02212	-0.217835	0.824718	0.484482	0.767942	0.0316579	8	8	8	27	27	27	37.924	14.793	29094000	16020000	13075000	NaN	-0.142661	-0.348225	-0.242903	-0.13755	NaN	NaN	0.0207236	-0.0368157	0.0824522	0.303287	NaN	0.192578	-0.181181	0.113273	-0.282836	0.0191419	-0.016548	-0.475422	0.502256
AT3G53990	Q9M328;Q8LC99	F5K20_290;At3g53990	Adenine nucleotide alpha hydrolases-like superfamily protein;AT3G53990 protein (AT3g53990) (AT3g53990/F5K20_290) (Adenine nucleotide alpha hydrolases-like superfamily protein)	0.171722	-0.124962	NaN	-0.226573	0.209771	0.281399	NaN	0.0249134	8	8	8	60.6	60.6	60.6	17.793	55.037	52936000	30538000	22399000	-0.176271	-0.31826	-0.10389	-0.135995	-0.398449	-0.376577	NaN	NaN	-0.282316	NaN	-0.0278091	NaN	-0.0464175	-0.186126	-0.239497	0.115699	-0.0852504	0.120108	0.299154	0.408897
AT2G34480	P51418	RPL18AB	60S ribosomal protein L18a-2	-0.0173297	-0.0766053	-0.0420288	-0.232673	0.820886	0.435314	0.866223	0.0140538	8	8	2	41.6	41.6	12.4	21.307	323.31	269540000	154480000	115060000	-0.158227	-0.259066	-0.236887	-0.138124	-0.371061	-0.338051	-0.335045	-0.207632	0.82188	-0.151296	-0.0893814	0.0815375	-0.0486324	-0.0842354	-0.242315	-0.0506983	0.0247275	-0.0393231	-0.0875145	0.0661598
AT3G59920	O24653	GDI2	Guanosine nucleotide diphosphate dissociation inhibitor 2 (AtGDI2)	-0.154061	-0.226106	-0.277453	-0.297846	0.0862194	0.113647	0.0133772	0.0501604	8	5	5	25	15.5	15.5	49.538	32.984	33377000	19490000	13887000	-0.0190186	-0.351311	-0.305032	NaN	-0.516024	-0.23268	-0.106804	-0.346529	-0.407598	-0.293654	-0.133766	NaN	-0.120513	-0.351857	-0.298289	-0.207424	-0.1623	-0.170754	-0.171284	-0.0585447
AT2G44350	P20115-2;P20115	CSY4	Citrate synthase 4, mitochondrial (EC 2.3.3.16)	0.065048	-0.0196572	1.01713	0.327875	0.60889	0.884351	0.000871276	0.151315	8	8	8	26.8	26.8	26.8	52.654	100.75	21332000	11108000	10224000	NaN	NaN	0.242621	0.711946	0.0290591	0.973075	0.950898	NaN	1.12888	1.01567	0.147105	-0.112335	-0.274882	-0.0157412	0.157567	NaN	0.105544	0.203988	0.119285	-0.168625
AT3G56150	O49160	TIF3C1	Eukaryotic translation initiation factor 3 subunit C (eIF3c) (Eukaryotic translation initiation factor 3 subunit 8) (eIF3 p110) (p105)	0.0177555	0.0473875	-0.170903	0.0896971	0.907394	0.845619	0.0202995	0.464063	8	8	8	11.3	11.3	11.3	102.95	33.939	32484000	18115000	14369000	-0.0393258	0.442731	0.19993	-0.0284207	-0.126429	-0.223059	-0.120499	-0.164491	-0.222152	-0.124314	0.10064	NaN	-0.390563	0.375729	0.103744	0.0718613	-0.318846	-0.0660606	0.255189	0.146634
AT2G21870	F4III4;Q9SJ12	MGP1	Probable ATP synthase 24 kDa subunit, mitochondrial;MALE GAMETOPHYTE DEFECTIVE 1	-0.471632	0.010254	-0.263544	-0.079034	0.308789	0.924739	0.0470765	0.532322	8	8	8	42.3	42.3	42.3	25.16	244.17	126850000	76743000	50111000	-0.122872	0.228124	-0.0123634	-0.435009	-0.0530495	-0.410062	-0.349642	-0.313658	0.0676847	-0.312043	-0.0648848	0.178861	-0.118592	0.129954	-0.0740682	-0.736983	-0.0921259	0.0301453	0.147272	-1.70647
AT3G10060	Q9SR70	FKBP16-4	Peptidyl-prolyl cis-trans isomerase FKBP16-4, chloroplastic (PPIase FKBP16-4) (EC 5.2.1.8) (FK506-binding protein 16-4) (AtFKBP16-4) (Immunophilin FKBP16-4) (Rotamase)	0.165688	0.0206432	0.19264	0.0318665	0.0755805	0.852356	0.0325948	0.571226	8	8	8	44.3	44.3	44.3	24.504	55.897	160260000	83796000	76465000	-0.0272947	0.139599	0.0522803	0.00594859	-0.0112009	0.240911	0.28784	0.206991	0.0226198	0.204839	0.0497801	0.183792	-0.0998228	0.0473377	-0.0778711	0.172049	0.248661	0.188889	0.087882	0.130961
AT3G56190	Q9SPE6;F4IZC8	ASNAP2;ALPHA-SNAP2	Alpha-soluble NSF attachment protein 2;Alpha-soluble NSF attachment protein 2 (Alpha-SNAP2) (N-ethylmaleimide-sensitive factor attachment protein alpha 2)	-0.151066	0.666648	-0.262964	0.0654133	0.601984	0.227913	0.00840641	0.644094	8	8	8	34.9	34.9	34.9	32.755	39.431	34213000	20567000	13647000	0.208537	NaN	-0.082114	-0.196743	0.331973	-0.200115	-0.35351	-0.312228	-0.174298	-0.274667	-0.101699	NaN	1.7677	0.34684	0.653749	-0.560283	-0.0454753	0.589135	-0.0908837	-0.647821
AT1G65980	Q9XEX2;F4ID64	PRXIIB;TPX1	Peroxiredoxin-2B (EC 1.11.1.15) (Peroxiredoxin IIB) (Peroxiredoxin TPx1) (Thioredoxin peroxidase 2B) (Thioredoxin-dependent peroxidase 1);Thioredoxin-dependent peroxidase 1	-0.236627	-0.324293	-0.236355	-0.0104083	0.0984909	0.215217	0.0431158	0.831878	8	8	8	79.6	79.6	79.6	17.428	176.87	116850000	70112000	46743000	0.0100576	-0.0501926	0.0345724	-0.021905	-0.024574	-0.261405	-0.134828	-0.483555	-0.0694429	-0.232546	-0.202852	-1.01866	-0.0988183	-0.212943	-0.0881917	-0.1095	-0.122534	-0.142133	-0.528339	-0.280627
AT5G39320	Q9FM01	UGD4	UDP-glucose 6-dehydrogenase 4 (UDP-Glc dehydrogenase 4) (UDP-GlcDH 4) (UDPGDH 4) (EC 1.1.1.22) (At-UGD4)	0.303206	NaN	0.434642	NaN	0.0805122	NaN	0.0145108	NaN	8	2	2	23.5	7.7	7.7	53.096	7.2935	6700300	3995300	2705000	NaN	NaN	NaN	NaN	NaN	0.330495	0.463537	NaN	0.509894	NaN	NaN	NaN	NaN	0.386913	NaN	0.328291	NaN	NaN	0.206426	0.3749
AT1G52570	Q9SSQ9	PLDALPHA2	Phospholipase D alpha 2 (AtPLDalpha2) (PLD alpha 2) (EC 3.1.4.4) (Choline phosphatase 2) (Phosphatidylcholine-hydrolyzing phospholipase D 2)	NaN	NaN	0.276792	NaN	NaN	NaN	0.0326934	NaN	8	3	3	13.8	6	6	91.597	8.399	8700600	5796200	2904500	NaN	NaN	NaN	NaN	NaN	NaN	0.348639	0.244402	NaN	0.237336	NaN	NaN	NaN	NaN	-2.29431	0.561062	0.307608	NaN	NaN	NaN
AT3G29185	F4J1U2;F4J2Z0	At3g29185	Glutamate NMDA receptor subunit epsilon-1, putative (DUF3598)	0.0800513	NaN	0.258764	NaN	0.416501	NaN	0.0330212	NaN	8	8	8	27.8	27.8	27.8	44.676	69.436	14715000	7846200	6868500	NaN	NaN	NaN	NaN	NaN	0.292065	0.271145	0.213083	NaN	NaN	0.201974	NaN	NaN	NaN	NaN	0.186282	-0.132095	0.0751714	0.160149	0.110749
AT4G19210	Q8LPJ4	ABCE2	ABC transporter E family member 2 (ABC transporter ABCE.2) (AtABCE2) (RNase L inhibitor-like protein 2) (AtRLI2) (AthaRLI2)	0.0794018	NaN	-0.153565	NaN	0.585234	NaN	0.042216	NaN	8	8	8	16.7	16.7	16.7	68.389	33.752	11549000	6140500	5408100	-0.104396	NaN	NaN	NaN	NaN	-0.14419	-0.109003	-0.0546113	-0.217563	-0.242459	-1.11748	NaN	NaN	1.28395	NaN	NaN	0.226293	0.0943415	NaN	-0.0824291
AT1G59900	P52901	E1 ALPHA	Pyruvate dehydrogenase E1 component subunit alpha-1, mitochondrial (PDHE1-A) (EC 1.2.4.1)	0.249301	0.0316524	0.540241	0.381908	0.103568	0.815855	0.0924931	0.016104	9	9	7	28	28	23.4	43.059	65.046	44576000	23481000	21095000	0.138803	0.432636	NaN	0.485577	0.470618	0.304862	0.963368	NaN	-0.0325429	0.925277	-0.0167879	0.00655605	-0.133929	0.322993	-0.0205704	NaN	0.248661	0.140532	0.469411	0.138601
AT1G35680	P51412	RPL21	50S ribosomal protein L21, chloroplastic (CL21)	0.101137	0.164921	0.144052	0.28001	0.3465	0.140603	0.052662	0.00483061	9	9	9	55.5	55.5	55.5	24.038	304.07	347340000	183110000	164230000	0.263082	0.277591	0.371202	0.2714	0.216775	0.14226	0.131447	0.12436	0.0486122	0.273581	0.147939	0.337751	0.137869	0.0445193	0.156525	0.0428161	0.260246	-0.0771843	0.244556	0.0352493
AT3G03710	Q8GZQ3	PNP1	Polyribonucleotide nucleotidyltransferase 1, chloroplastic (AtcpPNPase) (EC 2.7.7.8) (Polynucleotide phosphorylase 1) (PNPase 1) (Protein PIGMENT DEFECTIVE 326) (Protein RESISTANT TO INHIBITION WITH FSM 10)	-0.150044	-0.0302124	0.166066	0.225933	0.3263	0.770823	0.103634	0.0190477	9	9	9	13.4	13.4	13.4	99.565	87.254	36576000	20070000	16507000	0.307879	NaN	0.160278	0.222064	0.213512	-0.0796358	0.272676	0.14609	0.327837	0.163365	-0.0601828	-0.146174	-0.112641	0.0604978	0.107438	0.243876	-0.354534	-0.287376	-0.197109	-0.155075
AT3G08740	Q8VZW6	At3g08740	Elongation factor P (EF-P) family protein (Putative elongation factor P (EF-P))	0.00369806	0.0771141	0.0708444	0.192075	0.986573	0.379894	0.354095	0.0159892	9	9	9	51.3	51.3	51.3	26.228	81.396	113860000	62028000	51831000	0.227061	0.280846	0.189238	0.151073	0.112158	-0.0726014	0.00136238	0.0812163	0.0864177	0.257827	0.00117052	0.123595	0.174057	-0.01255	0.0992979	0.542115	-0.0858572	-0.335669	0.0272815	-0.12938
AT2G45470	O22126	FLA8	Fasciclin-like arabinogalactan protein 8 (AtAGP8)	0.0341928	-0.0265108	0.0746562	-0.146163	0.719807	0.881458	0.529478	0.0227817	9	9	9	32.6	32.6	32.6	43.074	323.31	348560000	182450000	166110000	-0.177286	-0.116321	-0.11622	-0.141601	-0.179389	0.262195	-0.172357	0.349546	0.0221466	-0.0882498	0.299138	NaN	-0.0431012	-0.140258	-0.221822	-0.162391	0.0439931	0.0390008	0.10073	0.149631
AT5G08530	Q9FNN5		NADH dehydrogenase [ubiquinone] flavoprotein 1, mitochondrial (EC 1.6.5.3) (EC 1.6.99.3)	-0.0491279	-0.146152	-0.0505318	-0.164137	0.594978	0.247417	0.431251	0.0356805	9	9	9	31.1	31.1	31.1	53.449	112.43	33609000	19498000	14111000	-0.164102	-0.115103	-0.218104	NaN	-0.159239	0.0174108	0.062678	-0.0398486	-0.149758	-0.143141	-0.0975286	-0.0462846	NaN	-0.325613	-0.115182	-0.04639	0.138374	-0.167645	-0.106929	-0.0630493
AT1G72160	Q56Z59	PATL3	Patellin-3	0.174849	-0.0496347	-0.238585	-0.173297	0.440568	0.722095	0.154428	0.0232623	9	9	9	25.5	25.5	25.5	56.104	30.431	19343000	11536000	7807600	-0.260309	-0.200353	-0.15329	-0.187078	-0.0654534	-0.519347	0.1154	-0.274049	-0.276344	NaN	0.0932073	NaN	0.0856809	-0.209865	-0.167562	-0.172364	NaN	NaN	0.359225	0.337685
AT1G79340	O64517	AMC4	Metacaspase-4 (AtMC4) (EC 3.4.22.-) (Metacaspase 2d) (AtMCP2d) (Metacaspase-7) [Cleaved into: Metacaspase-4 subunit p20;Metacaspase-4 subunit p10]	-0.0983399	-0.105141	-0.169862	-0.184188	0.607698	0.211859	0.13136	0.0439918	9	9	9	40	40	40	45.483	34.289	21455000	12120000	9334200	-0.22736	-0.0958486	-0.381214	-0.132949	-0.0835708	-0.185759	-0.055407	NaN	NaN	-0.268419	-0.121012	-0.130448	-0.0770354	-0.0307208	-0.166487	0.300443	-0.51532	-0.301732	0.0154959	0.00941342
AT3G25770	Q9LS02	AOC2	Allene oxide cyclase 2, chloroplastic (EC 5.3.99.6)	-0.105257	-0.263221	-0.0162869	-0.207358	0.581669	0.225957	0.902528	0.0305278	9	9	7	41.5	41.5	34.8	27.635	127.23	129180000	69630000	59548000	-0.316672	-0.268679	-0.265835	-0.000533678	-0.185068	-0.0797024	0.300107	0.0195015	0.0684915	-0.389832	-0.781403	-0.237915	-0.27289	0.0954185	-0.119316	-0.141194	0.367569	-0.115745	-0.508899	-0.128016
AT4G34050	O49499;Q3E6Z1	CCOAOMT1;CCoAOMT1	Caffeoyl-CoA O-methyltransferase 1 (EC 2.1.1.104) (Trans-caffeoyl-CoA 3-O-methyltransferase) (CCoAMT) (CCoAOMT1);S-adenosyl-L-methionine-dependent methyltransferases superfamily protein	0.00219578	-0.0415905	0.135831	-0.218869	0.983519	0.708113	0.115357	0.0218233	9	9	9	60.6	60.6	60.6	29.155	85.096	132660000	71916000	60747000	-0.0312715	-0.308143	-0.248105	-0.226257	-0.280569	0.183864	-0.04045	0.064739	0.286133	0.184869	-0.242282	0.0623846	0.034676	0.057094	-0.119825	-0.0484451	0.0180127	0.151422	-0.053264	-0.0567467
AT4G23650	Q42479	CPK3	Calcium-dependent protein kinase 3 (EC 2.7.11.1) (Calcium-dependent protein kinase isoform CDPK6) (AtCDPK6)	-0.19071	-0.248522	-0.402912	-0.385514	0.168898	0.143758	0.0519292	0.00864871	9	9	9	23.8	23.8	23.8	59.336	86.279	20289000	12460000	7828300	-0.303103	-0.321959	-0.486785	-0.598003	-0.217719	-0.311754	NaN	-0.773342	-0.121085	-0.405469	-0.21423	NaN	-0.458442	-0.0379626	-0.283452	NaN	0.0186401	-0.293436	-0.302797	-0.185246
AT5G20280	Q94BT0	SPS1	Sucrose-phosphate synthase 1 (EC 2.4.1.14) (Sucrose-phosphate synthase 1F) (AtSPS1F) (Sucrose-phosphate synthase 5.1) (AtSPS5.1) (UDP-glucose-fructose-phosphate glucosyltransferase)	0.014862	-0.19235	-0.419515	-0.502565	0.95662	0.215421	0.134344	0.0166164	9	9	8	14.1	14.1	13.4	117.32	33.25	23833000	13227000	10606000	-0.0241744	-0.620257	-0.47623	-0.627115	-0.76505	0.464616	-0.579682	-0.75859	-0.651816	-0.572105	-0.122447	NaN	-0.267929	-0.390939	0.0119158	NaN	0.292771	0.067777	0.26872	-0.56982
AT1G74910	Q9C9P3	F9E10.24	64911-67597);ADP-glucose pyrophosphorylase family protein (At1g74910/F9E10_24) (Putative GDP-mannose pyrophosphorylase	-0.222316	0.0279729	-0.502385	-0.503902	0.0626823	0.86594	0.0894055	0.0145307	9	9	1	34.5	34.5	2.9	45.563	28.111	24094000	13547000	10547000	NaN	-0.714585	-0.661629	-0.2478	-0.391593	-0.0631492	-0.71585	NaN	-0.728156	NaN	0.0431526	-0.235016	0.0695599	-0.107172	0.36934	-0.193223	-0.128861	-0.345006	-0.125944	-0.318544
AT1G03220	Q9ZVS4	F15K9.17	Eukaryotic aspartyl protease family protein (F15K9.17 protein)	0.019983	-0.11656	0.266279	0.208404	0.782784	0.42903	0.0393243	0.0551663	9	9	6	26.8	26.8	19.2	45.717	25.386	41779000	21929000	19850000	0.451987	0.0287294	0.248965	0.0913666	0.220972	0.116883	0.381657	0.0943271	0.508274	0.230255	-0.159914	-0.472569	0.0977485	-0.0334593	-0.0146072	0.0956401	-0.00606517	-0.0121586	-0.00631136	0.0288101
AT3G05350	Q8RY11	At3g05350	Aminopeptidase P2 (AtAPP2) (EC 3.4.11.9)	0.0829926	-0.104208	-0.189773	-0.11374	0.413351	0.566082	0.0274376	0.39139	9	9	9	21.8	21.8	21.8	78.708	40.741	30576000	16741000	13834000	-0.108757	NaN	0.191535	-0.17941	-0.358328	-0.2737	-0.256888	-0.219024	-0.061979	-0.137275	-0.0289192	NaN	-0.489024	0.0834659	0.0176459	0.155368	-0.0241245	0.163378	-0.0921814	0.212523
AT2G20890	Q9SKT0	THF1, PSB29	Protein THYLAKOID FORMATION 1, chloroplastic	-0.382136	0.107676	0.295893	0.0717064	0.330494	0.58573	0.0234068	0.451861	9	9	9	38	38	38	33.795	323.31	337320000	184360000	152960000	-0.0019936	0.229809	-0.174856	0.0810268	0.224546	0.297326	0.161602	0.540453	0.345388	0.134695	0.131577	0.646588	-0.122407	-0.14013	0.0227513	-0.571219	0.171631	0.140815	-0.218095	-1.43381
AT3G20050	P28769	CCT1	T-complex protein 1 subunit alpha (TCP-1-alpha) (CCT-alpha) (Chaperonin CCT1)	0.0754236	0.0142765	-0.390713	NaN	0.366321	0.891843	0.00305176	NaN	9	9	9	30.6	30.6	30.6	59.229	124.17	29554000	17212000	12342000	-0.218315	-0.327457	NaN	NaN	NaN	-0.287003	-0.469157	-0.410624	-0.443222	-0.34356	0.157922	-0.106287	0.141274	-0.0817862	-0.0397401	-0.0391499	0.028377	0.172316	0.0610209	0.154554
ATCG00160	P56797	rps2	30S ribosomal protein S2, chloroplastic	0.0373551	0.0503959	0.312072	NaN	0.801032	0.851294	0.00840641	NaN	9	9	9	56.8	56.8	56.8	26.904	157.43	155660000	82499000	73162000	NaN	NaN	0.121518	0.0281407	NaN	0.463361	0.22469	0.272463	0.220304	0.379541	0.636452	0.158462	-0.134076	-0.0180026	-0.390856	0.271478	0.109996	0.180692	-0.0818826	-0.293508
AT5G16620	Q9FMD5	TIC40	Protein TIC 40, chloroplastic (Protein PIGMENT DEFECTIVE EMBRYO 120) (Translocon at the inner envelope membrane of chloroplasts 40) (AtTIC40)	-0.156883	NaN	-0.309241	NaN	0.119783	NaN	0.0276265	NaN	9	9	9	31.5	31.5	31.5	48.903	78.945	34096000	19406000	14689000	NaN	NaN	NaN	NaN	NaN	-0.317254	-0.380131	NaN	-0.230337	NaN	-0.19611	NaN	-0.175698	NaN	NaN	-0.0386743	-0.250277	-0.138958	-0.277448	-0.0790592
AT1G66430	Q9C524		Probable fructokinase-6, chloroplastic (EC 2.7.1.4)	0.241312	-0.106473	-0.161267	NaN	0.42953	0.722949	0.0367091	NaN	9	9	9	30.5	30.5	30.5	41.471	41.631	32948000	18377000	14572000	NaN	NaN	NaN	-0.572568	-0.114075	-0.274176	-0.136084	-0.126135	-0.199063	-0.070876	-0.129087	NaN	-0.713185	0.145576	0.270803	1.13467	0.193884	-0.128447	0.0634009	-0.0569463
AT4G04770	Q9ZS97	ABCI8	UPF0051 protein ABCI8, chloroplastic (ABC transporter I family member 8) (ABC transporter ABCI.8) (AtABCI8) (Non-intrinsic ABC protein 1) (Protein ABC1) (Plastid sufB-like protein) (Protein LONG AFTER FAR-RED 6)	0.381683	NaN	0.295578	NaN	0.218843	NaN	0.0381153	NaN	9	9	8	21.7	21.7	19.4	61.867	16.384	15445000	7581300	7863700	NaN	NaN	NaN	NaN	NaN	0.187185	0.382827	NaN	0.316721	NaN	0.0570592	NaN	NaN	NaN	NaN	-0.0867644	0.127988	NaN	0.891128	0.594382
AT3G10670	Q9CAF5	ABCI6	ABC transporter I family member 6, chloroplastic (ABC transporter ABCI.6) (AtABCI6) (ABC transporter ATPase) (Non-intrinsic ABC protein 7) (AtNAP7) (Plastid SufC-like protein)	0.0255066	0.394282	0.170307	NaN	0.785127	0.201798	0.0498475	NaN	9	9	9	35.5	35.5	35.5	36.931	19.831	46165000	25083000	21082000	NaN	NaN	NaN	0.272031	0.1838	0.325606	0.18127	0.0424781	0.103587	0.198592	0.182211	NaN	0.15144	1.0104	0.233078	0.0186168	0.122337	0.154043	-0.0986884	-0.0687755
AT2G31570	O04922	GPX2	Probable glutathione peroxidase 2 (EC 1.11.1.9)	0.119145	0.178885	0.145954	0.486574	0.317603	0.47181	0.192532	0.0430693	10	10	8	66.3	66.3	60.4	18.944	29.474	132320000	62639000	69678000	0.812728	0.280596	0.0931849	0.25092	0.995439	0.259305	-0.0662633	0.110144	0.0146499	0.411932	-0.267948	-0.0867797	0.460722	0.741246	0.0471828	0.0745011	-0.146846	0.189799	0.278795	0.199477
AT5G19510	Q9SCX3		Elongation factor 1-beta 2 (EF-1-beta 2) (Elongation factor 1-beta' 2) (EF-1-beta' 2) (Elongation factor 1B-alpha 2) (eEF-1B alpha 2)	0.0728422	-0.0753811	0.0547171	0.229456	0.499913	0.807426	0.435219	0.0152247	10	9	8	66.1	62.1	55.8	24.201	280.44	381370000	198980000	182390000	0.219992	0.302442	0.194849	0.335508	0.0944915	0.0138456	0.000829101	-0.0777243	0.198642	0.137993	-0.0274056	-0.887975	0.291004	0.13145	0.116021	0.128662	0.216209	0.139874	-0.18418	0.0636458
AT3G48930	P16181	RPS11A	40S ribosomal protein S11-1 (Protein EMBRYO DEFECTIVE 1080)	-0.00121182	-0.0899295	0.0138456	0.19598	0.992462	0.758193	0.896994	0.0220239	10	10	5	51.9	51.9	22.5	17.957	37.8	232780000	132600000	100180000	0.116661	0.312264	0.272489	0.144054	0.134432	-0.150186	0.241493	0.090857	-0.219307	0.106371	0.236402	-0.496689	NaN	-0.00950164	NaN	0.0321426	-0.275899	0.12398	0.101865	0.0118523
AT3G27925	O22609	DEGP1	Protease Do-like 1, chloroplastic (EC 3.4.21.-) (Protein DEGRADATION OF PERIPLASMIC PROTEINS 1) (DEGP PROTEASE 1)	0.101696	-0.112734	-0.126069	-0.160282	0.388247	0.29989	0.141588	0.0263913	10	10	10	38	38	38	46.673	195.35	103240000	55582000	47663000	-0.184185	-0.249805	-0.0881936	-0.17591	-0.103318	-0.130481	NaN	-0.263321	-0.0803154	-0.0301596	-0.137335	NaN	-0.155281	0.0226068	-0.180926	0.290666	-0.0459343	-0.0923551	0.233865	0.12224
AT2G33040	Q96250	ATPC	ATP synthase subunit gamma, mitochondrial (F-ATPase gamma subunit)	-0.0229706	-0.160678	-0.103123	-0.195482	0.783921	0.0841473	0.225783	0.0276019	10	10	10	45.2	45.2	45.2	35.448	319.95	211760000	118770000	92990000	-0.149143	-0.252952	-0.0555583	-0.182244	-0.337514	-0.00871357	0.0451042	-0.235458	-0.257815	-0.0587338	-0.202625	-0.144798	-0.120207	-0.191903	-0.143857	0.100701	-0.131973	-0.0480445	-0.0400786	0.00454235
AT2G06850	Q39099	XTH4	Xyloglucan endotransglucosylase/hydrolase protein 4 (At-XTH4) (XTH-4) (EC 2.4.1.207)	0.0481255	-0.0587289	-0.15433	-0.109681	0.527111	0.487032	0.0470765	0.123076	10	10	10	39.9	39.9	39.9	34.291	106.33	138660000	80860000	57801000	-0.172491	-0.0333499	0.00141323	-0.102023	-0.241952	-0.248952	-0.0198754	-0.129442	-0.188554	-0.184829	0.0528043	-0.120762	-0.00362129	-0.156832	-0.0652333	0.107511	0.0828345	0.0239251	-0.064939	0.091296
AT2G41530	Q8LAS8	SFGH	S-formylglutathione hydrolase (AtSFGH) (EC 3.1.2.12) (Esterase D)	-0.066324	0.0150672	0.376727	0.0991432	0.671389	0.877274	0.0371208	0.331151	10	10	10	47.9	47.9	47.9	31.655	96.328	44542000	26267000	18275000	0.265288	-0.194413	0.243848	0.0883585	0.0926346	NaN	0.278927	NaN	0.557953	0.293302	-0.0214005	NaN	0.00654888	0.032324	0.0427966	0.0612041	0.122804	0.138828	-0.23345	-0.421006
AT5G19940	Q941D3;F4K2P2	PAP8;At5g19940	Probable plastid-lipid-associated protein 8, chloroplastic (Fibrillin-6);Plastid-lipid associated protein PAP / fibrillin family protein	-0.186315	-0.112741	-0.160048	0.0270046	0.0658148	0.436362	0.0283699	0.771278	10	10	10	51	51	51	26.482	115.35	172280000	96131000	76145000	-0.126811	0.110483	0.265245	-0.0811652	-0.0327288	-0.133223	-0.227957	-0.204956	-0.158936	-0.0751698	-0.268961	-0.0187156	0.0300917	-0.406485	0.100363	-0.26429	-0.158182	-0.180161	-0.248363	-0.0805807
ATCG00500	P56765	accD	Acetyl-coenzyme A carboxylase carboxyl transferase subunit beta, chloroplastic (ACCase subunit beta) (Acetyl-CoA carboxylase carboxyltransferase subunit beta) (EC 2.1.3.15)	0.321283	0.157237	0.311971	NaN	0.118278	0.290292	0.0364246	NaN	10	10	10	29.5	29.5	29.5	55.635	83.922	43096000	21873000	21223000	NaN	NaN	NaN	NaN	NaN	NaN	NaN	0.353986	0.391896	0.19003	0.17815	NaN	NaN	0.0320791	0.261481	0.269489	0.175293	-0.031882	0.453309	0.740206
AT1G32200	Q43307	ATS1	Glycerol-3-phosphate acyltransferase, chloroplastic (GPAT) (EC 2.3.1.15)	0.0483906	0.245355	0.123376	0.54739	0.67938	0.0808662	0.0890931	0.00226972	11	11	11	38.1	38.1	38.1	50.421	218.89	79360000	42140000	37220000	0.506373	NaN	0.614212	0.504292	0.564684	0.111591	0.177095	-0.0276156	0.166923	0.188885	0.327935	NaN	0.188117	0.318458	0.146911	0.21606	0.238463	-0.0994098	0.00897372	-0.122134
AT1G80480	Q9M8L6	T21F11.27	At1g80480 (Plastid transcriptionally active 17)	0.181591	0.317565	0.244541	0.473152	0.310208	0.175023	0.0594249	0.0156917	11	11	10	40.8	40.8	38.3	49.487	38.679	49691000	24625000	25066000	NaN	0.497349	NaN	0.608756	0.313352	0.486124	0.202365	0.14721	0.389374	-0.00236942	0.203694	NaN	0.117269	0.198354	0.750942	-0.0473463	0.387136	0.404969	0.352619	-0.189421
AT3G60820	P42742;F4JD01	PBF1	Proteasome subunit beta type (EC 3.4.25.1);Proteasome subunit beta type-1 (EC 3.4.25.1) (20S proteasome beta subunit F-1) (Proteasome component 5) (Proteasome subunit beta type-6) (TAS-F22/FAFP98) (TAS-G39.20)	-0.0713683	-0.0527482	0.819456	0.29266	0.338112	0.688522	0.157285	0.038151	11	11	11	67.7	67.7	67.7	24.644	109.81	43222000	23772000	19450000	0.149402	NaN	0.381224	NaN	0.347355	NaN	0.781146	0.771652	2.05104	-0.326016	-0.0552219	NaN	-0.0640938	0.133191	-0.224868	-0.0503255	-0.0114352	-0.166517	-0.0793836	-0.04918
AT3G26060	F4JBC9;Q9LU86	ATPRX Q;PRXQ	Peroxiredoxin Q, chloroplastic (EC 1.11.1.15) (Thioredoxin peroxidase);Thioredoxin superfamily protein	0.00709209	-0.0892883	0.183687	0.268802	0.984327	0.771724	0.228113	0.0403346	11	11	11	50.7	50.7	50.7	23.806	240.5	462450000	240060000	222390000	0.0421574	0.3585	0.149458	0.238051	0.555844	-0.258296	0.0860869	0.384956	0.391354	0.314332	0.360158	-0.137336	0.0766905	0.128651	-0.874605	0.000119954	-0.768881	0.335959	0.525848	-0.0575855
AT5G57870	Q93ZT6;Q93ZT6-2	EIF(ISO)4G1	Eukaryotic translation initiation factor isoform 4G-1 (eIF(iso)4G-1)	-0.190693	0.251825	0.0651642	0.194513	0.0984909	0.167421	0.44225	0.0276019	11	11	11	18.7	18.7	18.7	85.571	117.48	33862000	20259000	13604000	0.178943	0.163262	0.123215	0.126704	0.380441	0.176502	0.13808	0.0489786	NaN	-0.102904	0.186869	NaN	0.164885	NaN	0.403721	NaN	-0.268608	-0.202283	-0.0896648	-0.202216
AT3G25920	P25873	RPL15	50S ribosomal protein L15, chloroplastic (CL15)	0.0283973	0.0758669	-0.0876703	0.190229	0.800687	0.574615	0.387338	0.0264948	11	11	11	40.8	40.8	40.8	29.707	323.31	397800000	213430000	184380000	0.10919	0.331709	0.13119	0.124189	0.254866	-0.204969	-0.0444155	0.00734618	-0.332941	0.136628	0.0757708	0.265851	-0.0735072	0.280936	-0.169716	-0.0517818	-0.129799	0.156246	0.225846	-0.0585246
AT2G37220	Q9ZUU4	CP29B	RNA-binding protein CP29B, chloroplastic (Ribonucleoprotein At2g37220)	0.160231	0.22228	0.0675373	0.159801	0.135076	0.0571585	0.418759	0.0403346	11	11	8	58.5	58.5	51.6	30.718	323.31	1017000000	490540000	526450000	0.0213836	0.270807	0.164725	0.140739	0.20135	-0.04654	-0.0975763	0.0858946	0.139037	0.256871	0.181818	0.155578	0.281667	0.238187	0.25415	0.329247	0.191799	0.0813772	0.0149173	0.183813
AT5G11420	Q9LYE7	F15N18_10	Uncharacterized protein At5g11420 (Uncharacterized protein F15N18_10)	-0.115919	-0.199452	-0.12191	-0.11291	0.285514	0.0703132	0.0955494	0.0427803	11	5	5	37.4	18.9	18.9	39.64	13.155	151510000	85967000	65547000	-0.0998845	-0.0981886	-0.127956	-0.133819	-0.1047	-0.158874	0.010683	-0.070493	-0.161212	-0.229652	-0.180233	-0.286335	-0.0922345	-0.24061	-0.197846	-0.0318056	-0.0496455	-0.124601	-0.35587	-0.0176705
AT2G05990	Q9SLA8	MOD1	Enoyl-[acyl-carrier-protein] reductase [NADH], chloroplastic (ENR) (EC 1.3.1.9) (NADH-dependent enoyl-ACP reductase 1) (Protein MOSAIC DEATH 1)	0.040073	-0.00089708	-0.0196463	-0.172204	0.643145	0.993834	0.728806	0.026395	11	11	11	50	50	50	41.213	323.31	172510000	91488000	81020000	-0.184657	-0.200126	-0.228536	-0.0330928	-0.21461	0.107565	-0.052083	-0.0552366	-0.0365594	-0.0619174	-0.0136544	-0.214934	0.107977	-0.126751	0.242877	0.0273734	0.214841	0.0256404	-0.0185484	-0.0489416
AT2G47610	P49692	RPL7AA	60S ribosomal protein L7a-1	-0.182088	-0.0533326	-0.273751	-0.320972	0.338807	0.602474	0.0120129	0.0614764	11	11	2	44.7	44.7	7.4	29.129	62.512	291760000	163730000	128030000	-0.35259	-0.162912	-0.0275598	-0.786668	-0.275132	-0.278598	-0.429595	-0.278359	-0.131997	-0.250206	-0.092262	NaN	-0.119756	-0.0802984	0.078986	-0.0546812	-0.0592631	-0.0339368	-0.03094	-0.73162
AT1G72370	B9DG17;Q08682	P40;RPSaA	40S ribosomal protein SA;40S ribosomal protein Sa-1 (Laminin receptor homolog) (p40)	-0.0110917	-0.0482521	-0.257335	-0.139731	0.878315	0.71655	0.00584612	0.0627291	11	11	11	46.6	46.6	46.6	31.981	323.31	475260000	262620000	212640000	-0.14856	-0.254183	-0.0152946	-0.203696	-0.0769195	-0.234438	-0.280357	-0.319898	-0.259655	-0.192328	0.0146206	0.204688	-0.0610162	-0.280658	-0.118895	-0.00804533	0.0188597	-0.0641835	0.0358143	-0.0379038
AT1G59610	Q9LQ55	DRP2B	Dynamin-2B (EC 3.6.5.5) (Dynamin-like protein 3) (Dynamin-related protein 2B)	-0.11609	NaN	-0.148257	-0.128986	0.436183	NaN	0.0465153	0.0895242	11	11	4	16	16	7.4	100.23	66.711	13910000	8229100	5681100	-0.100706	-0.090339	-0.0178882	-0.134957	-0.301042	-0.0395354	-0.126085	-0.147488	-0.176533	-0.251644	NaN	-0.403461	NaN	-0.00895873	NaN	NaN	0.0512017	-0.121213	0.0030542	-0.397403
AT3G62530	Q94K48	At3g62530	ARM repeat superfamily protein	-0.320393	-0.239138	-0.57844	-0.421421	0.0594971	0.149745	0.0140788	0.117861	11	11	11	62.4	62.4	62.4	24.503	154.26	107360000	65343000	42015000	-0.390515	-0.811215	NaN	0.207878	-0.691832	-0.843974	-0.52943	-0.236438	-0.370768	-0.911592	-0.265646	NaN	-0.453756	-0.183301	-0.0538473	-0.620919	-0.165789	-0.176566	-0.309213	-0.329477
AT3G24170	P48641		Glutathione reductase, cytosolic (GR) (GRase) (EC 1.8.1.7) (OBP29)	0.00405449	0.0835481	0.212136	0.118979	0.975692	0.384474	0.0223168	0.179504	11	11	11	40.3	40.3	40.3	53.87	94.801	64052000	36042000	28010000	0.340475	0.0354156	0.194042	-0.0359503	0.0609139	0.197653	0.0561473	0.289251	0.292112	0.225515	0.0407977	0.215084	0.133357	-0.0611547	0.0896566	0.263503	-0.074371	-0.137943	-0.00110883	-0.0298077
AT2G44120	F4IT48;P60039	At2g44120;RPL7C	60S ribosomal protein L7-3;Ribosomal protein L30/L7 family protein	-0.226643	NaN	-0.234205	-0.100469	0.3005	NaN	0.00908741	0.212699	11	6	3	38.5	19	9.7	28.519	45.682	79391000	46217000	33174000	-0.0345193	-0.0895628	-0.0265417	NaN	-0.251251	-0.166626	-0.253476	-0.326987	-0.20694	-0.216995	-0.118216	NaN	NaN	NaN	-0.0623571	NaN	-0.248786	-0.121088	0.102637	-0.639335
AT5G15200	Q9LXG1;B3H7J6	RPS9B;At5g15200	40S ribosomal protein S9-1;Ribosomal protein S4	-0.0500228	-0.178622	-0.273402	-0.0921686	0.581669	0.172252	0.0114872	0.289416	11	11	11	50	50	50	23.036	135.28	443340000	254770000	188580000	-0.129539	-0.175931	-0.201967	-0.120168	0.166762	-0.297525	-0.234917	-0.245896	-0.433273	-0.1554	-0.349737	-0.113318	-0.162565	0.0365009	-0.30399	0.0422169	0.0678325	-0.0960981	-0.0590641	-0.205001
AT2G01250	P60040;A8MRH4	RPL7B;At2g01250	60S ribosomal protein L7-2;AT2G01250 protein (Ribosomal protein L30/L7 family protein)	-0.275378	0.0687311	-0.222405	-0.0787848	0.228053	0.626504	0.0367091	0.301699	11	11	6	39.7	39.7	19.8	28.171	160.07	439030000	253650000	185380000	0.0495379	-0.0217206	-0.0672829	-0.0743754	-0.280083	-0.127779	-0.354948	-0.365335	-0.203461	-0.0605035	-0.034922	0.432996	0.0183684	-0.102903	0.0301163	-0.182328	-0.0324189	0.0449649	-0.35921	-0.847897
AT1G58380;AT1G58684;AT1G58983;AT1G59359	Q93VB8;Q8L8Y0	RPS2B;RPS2A	40S ribosomal protein S2-1;40S ribosomal protein S2-2	0.192989	NaN	0.631367	NaN	0.472429	NaN	0.00485854	NaN	11	3	3	42.6	13.7	13.7	30.771	24.771	56602000	26617000	29986000	NaN	NaN	NaN	NaN	NaN	0.660835	0.569455	0.663812	NaN	NaN	0.133562	NaN	NaN	0.470028	NaN	-0.167773	0.912118	0.148633	-0.229418	0.301387
AT3G02520	Q96300	GRF7	14-3-3-like protein GF14 nu (General regulatory factor 7)	-0.136078	-0.0365236	-0.21202	NaN	0.236123	0.794045	0.0472739	NaN	11	3	3	52.5	20.8	20.8	29.824	67.073	21119000	11857000	9261500	NaN	NaN	NaN	NaN	-0.259549	NaN	-0.201368	-0.240741	NaN	-0.193952	-0.0630056	NaN	0.187529	-0.123515	-0.147103	-0.262746	-0.231878	0.0994363	-0.0756562	-0.209544
AT1G05190	O23049	RPL6	50S ribosomal protein L6, chloroplastic (Protein EMBRYO DEFECTIVE 2394)	0.125537	0.246264	0.0708774	0.283666	0.275834	0.0817074	0.433352	0.00808947	12	12	12	52.5	52.5	52.5	24.705	195.32	691990000	424510000	267480000	0.29366	0.421676	0.254222	0.270136	0.178635	-0.0785885	0.0860869	-0.00907537	0.0189629	0.337001	0.208983	0.0831221	0.301694	0.469193	0.168327	0.00498007	0.316947	0.0576265	0.260161	-0.0120271
AT5G67360	O65351	SBT1.7	Subtilisin-like protease SBT1.7 (EC 3.4.21.-) (Cucumisin-like serine protease) (Subtilase subfamily 1 member 7) (AtSBT1.7) (Subtilisin-like serine protease 1) (At-SLP1)	-0.0851001	-0.000805125	0.198892	0.254921	0.454864	0.993834	0.159135	0.0070938	12	12	12	30.8	30.8	30.8	79.414	135.66	34511000	18341000	16170000	0.318803	0.217318	0.298858	0.172604	0.26702	-0.209238	0.365206	0.401939	0.151672	0.284883	0.0100092	NaN	0.0937371	0.0771052	-0.184072	0.0271714	-0.195805	-0.0247807	-0.313384	0.0812977
AT2G35490	O82291	PAP3	Probable plastid-lipid-associated protein 3, chloroplastic (AtPap3) (Fibrillin-2) (Plastoglobulin 40) (AtPGL40)	0.00990358	0.0385148	0.179491	0.181573	0.928835	0.771724	0.082409	0.0276019	12	12	12	41.8	41.8	41.8	40.505	241.73	215680000	113740000	101950000	0.107444	0.159322	0.201127	0.332969	0.107003	0.428821	0.210724	0.131812	0.0680148	0.0580836	0.135155	-0.254414	0.131769	0.026339	0.153725	0.0179736	0.197906	-0.0271104	0.0474357	-0.186687
AT4G23100	P46309;F4JMS5	GSH1	Glutamate--cysteine ligase, chloroplastic (EC 6.3.2.2) (Gamma-ECS) (GCS) (Gamma-glutamylcysteine synthetase) (Protein ROOT MERISTEMLESS 1) (AtGCL) (Protein cadmium-sensitive 2) (Protein phytoalexin-deficient 2);Glutamate-cysteine ligase	-0.127781	0.101501	0.0960625	0.164227	0.334421	0.291223	0.212671	0.0324853	12	12	12	39.7	39.7	39.7	58.562	199.42	164590000	91857000	72734000	0.172547	0.175959	0.217223	0.235075	0.020329	0.284074	0.0757961	0.0105132	-0.00819281	0.118122	0.243106	0.138151	0.0783408	-0.0321583	0.0800663	-0.0586394	0.0680749	-0.0411851	-0.448743	-0.158413
AT5G55280	Q42545	FTSZ1	Cell division protein FtsZ homolog 1, chloroplastic (AtFtsZ1) (AtFtsZ1-1) (Chloroplast FtsZ) (CpFtsZ) (Protein ACCUMULATION AND REPLICATION OF CHLOROPLASTS 10) (Protein PLASTID MOVEMENT IMPAIRED4)	0.132374	0.00524564	0.0985721	0.116438	0.115907	0.947416	0.136247	0.0439918	12	12	12	51.5	51.5	51.5	45.564	136.06	87908000	51325000	36582000	0.102212	0.16976	0.100096	0.120407	0.0897143	0.125767	0.0744752	0.0229034	0.0412709	0.228444	-0.0292557	0.0297502	0.0914759	-0.0642942	-0.00144798	0.18491	0.206054	0.0851995	0.0814264	0.104282
AT3G17240	Q9M5K2	LPD2	Dihydrolipoyl dehydrogenase 2, mitochondrial (AtmLPD2) (mtLPD2) (EC 1.8.1.4) (Dihydrolipoamide dehydrogenase 2) (Glycine cleavage system L protein 2) (Pyruvate dehydrogenase complex E3 subunit 2) (E3-2) (PDC-E3 2)	-0.113893	-0.0939054	NaN	-0.12896	0.502458	0.269651	NaN	0.0301983	12	6	6	37.3	21.9	21.9	53.985	49.281	29262000	16051000	13210000	-0.120824	-0.1335	-0.0872119	-0.15522	-0.148046	-0.080218	NaN	NaN	NaN	-0.0740865	-0.176835	-0.153262	-0.0472477	-0.0536358	-0.0385463	0.363096	-0.238797	-0.111541	-0.24709	-0.335132
AT1G03130;AT4G02770	Q9S7H1;Q9SA56	psaD1;PSAD2	Photosystem I reaction center subunit II-1, chloroplastic (Photosystem I 20 kDa subunit 1) (PSI-D1);"Photosystem I reaction center subunit II-2, chloroplastic (Photosystem I 20 kDa subunit 2) (PSI-D2)"	-0.356985	-0.348795	-0.194574	-0.149992	0.0774945	0.0595994	0.054272	0.0486644	12	12	12	61.1	61.1	61.1	22.598	323.31	4172000000	2457000000	1714900000	-0.277428	-0.0491391	-0.127277	-0.203047	-0.0930677	-0.333364	-0.31037	-0.0282294	-0.226891	-0.0740177	-0.183244	-0.239796	-0.341229	-0.333992	-0.645714	-0.349901	-0.734828	-0.137436	-0.109135	-0.453625
AT5G44020	Q9FNC4		HAD superfamily, subfamily IIIB acid phosphatase (Putative vegetative storage protein) (Vegetative storage protein-like)	0.0922902	-0.108952	-0.0903847	-0.156859	0.308789	0.569659	0.157976	0.0446545	12	12	10	57	57	51.1	31.056	323.31	591190000	323080000	268110000	-0.0643572	-0.0452931	-0.216285	-0.210578	-0.24778	-0.210257	-0.0954769	-0.0201817	-0.0122971	-0.113711	0.0415831	0.220854	-0.595145	-0.195407	-0.0166472	0.068432	0.164562	0.215659	-0.0424852	0.0552832
AT4G26690	Q9SZ11	GDPDL3	Glycerophosphodiester phosphodiesterase GDPDL3 (EC 3.1.4.46) (Glycerophosphodiester phosphodiesterase-like 3) (ATGDPDL3) (Glycerophosphodiesterase-like 2) (Protein MUTANT ROOT HAIR 5) (Protein SHAVEN 3)	0.233984	-0.099529	-0.226033	-0.180523	0.0978726	0.536647	0.0580316	0.0311101	12	11	11	21.9	20.6	20.6	82.561	130.02	42131000	23652000	18479000	-0.160843	-0.258175	-0.035943	-0.290103	-0.157552	-0.275261	-0.0513124	-0.157701	-0.141868	-0.504022	0.136671	0.207112	-0.195472	-0.339321	-0.306635	0.164023	0.230902	NaN	0.124747	0.416266
AT2G43710	F4IS32;O22832	SSI2;FAB2	Stearoyl-[acyl-carrier-protein] 9-desaturase 7, chloroplastic (Stearoyl-ACP desaturase 7) (EC 1.14.19.2) (Acyl-[acyl-carrier-protein] desaturase 7) (Protein FATTY ACID BIOSYNTHESIS 2) (Protein SUPPRESSOR OF SA INSENSITIVITY 2) (AtSSI2);Acyl-[acyl-carrier-protein] desaturase (EC 1.14.19.-)	-0.112671	-0.137343	-0.314358	-0.375412	0.374208	0.430744	0.13924	0.00567797	12	12	11	44.4	44.4	40.1	45.65	126.48	95488000	53601000	41887000	-0.443657	-0.184987	-0.506387	-0.351916	-0.390112	0.342461	-0.396925	-0.402598	-0.497631	-0.617099	-0.42011	-0.121964	0.161775	NaN	-0.169074	-0.196304	-0.0841218	-0.0341052	0.127872	-0.376695
AT1G80560	P93832	IMDH2	3-isopropylmalate dehydrogenase 2, chloroplastic (3-IPM-DH 2) (IMDH 2) (EC 1.1.1.85) (Beta-IPM dehydrogenase 2)	-0.0886973	0.119174	-0.146479	-0.385316	0.615767	0.2697	0.160997	0.0162997	12	6	6	49.1	26.9	26.9	43.37	42.317	14944000	7925300	7019100	-0.33015	-0.324486	NaN	NaN	-0.501312	NaN	-0.164837	NaN	-0.236416	-0.0381847	0.183736	NaN	0.195155	0.0615138	0.0362914	-0.427779	NaN	0.0604077	0.157901	-0.145319
AT2G39800	B9DFG0;F4IFZ9;P54887	P5CS1;P5CSA	AT2G39800 protein (Delta1-pyrroline-5-carboxylate synthase 1);Delta-1-pyrroline-5-carboxylate synthase [Includes: Glutamate 5-kinase (GK) (EC 2.7.2.11) (Gamma-glutamyl kinase);Delta-1-pyrroline-5-carboxylate synthase A (P5CS A) [Includes: Glutamate 5-kinase (GK) (EC 2.7.2.11) (Gamma-glutamyl kinase);Gamma-glutamyl phosphate reductase (GPR) (EC 1.2.1.41) (Glutamate-5-semialdehyde dehydrogenase) (G…	-0.137754	-0.0799608	-0.313841	-0.126643	0.274832	0.602474	0.0196776	0.191606	12	12	8	31.4	31.4	24.3	66.758	63.232	54144000	29752000	24392000	0.0797656	-0.266027	0.00617042	-0.140794	-0.312328	-0.17545	-0.117622	-0.47182	-0.347934	-0.456377	-0.196526	NaN	-0.307765	0.12192	0.062528	0.15789	-0.272575	-0.173778	-0.141043	-0.259265
AT1G30230	A8MRC4;P48006	At1g30230	Elongation factor 1-delta 1 (EF-1-delta 1) (Elongation factor 1B-beta 1) (eEF-1B beta 1);Translation elongation factor EF1B/ribosomal protein S6 family protein	-0.048302	-0.0344742	-0.241132	-0.0532384	0.502948	0.701179	0.0145108	0.354598	12	12	7	61.5	61.5	45.8	28.776	323.31	378420000	211760000	166660000	0.0328354	-0.121567	-0.0948021	0.0125983	-0.0952568	-0.259218	-0.359465	-0.252082	-0.242839	-0.0920561	-0.0228576	-0.0208417	0.0621371	-0.162859	-0.0279499	-0.00300317	-0.00450262	-0.0547828	-0.145509	-0.0337125
AT4G12420	Q9SU40	SKU5	Monocopper oxidase-like protein SKU5 (Skewed roots)	0.0382111	0.256074	0.29723	0.0908073	0.61039	0.216106	0.0108504	0.400873	12	12	12	27.4	27.4	27.4	65.637	147.19	129250000	72478000	56767000	0.130847	0.0844981	-0.189401	0.368829	0.0592634	0.324475	0.476063	0.238006	0.179844	0.267762	0.568903	0.585009	0.116404	0.0937042	-0.0836484	0.137229	-0.0225423	0.0430489	0.0539276	-0.0206077
AT4G31480;AT4G31490	Q9SV20;Q9SV21		Coatomer subunit beta-1 (Beta-coat protein 1) (Beta-COP 1);Coatomer subunit beta-2 (Beta-coat protein 2) (Beta-COP 2)	-0.205724	-0.421744	-0.225153	NaN	0.228721	0.0613497	0.0274982	NaN	12	12	12	15.3	15.3	15.3	106.08	16.525	18845000	11777000	7067900	0.0127076	NaN	-0.238799	NaN	NaN	-0.205713	NaN	-0.155018	-0.202996	-0.336884	-0.523187	NaN	NaN	-0.324213	-0.417833	0.0275752	-0.0742706	-0.596225	-0.0581762	-0.327524
AT3G63520	O65572	CCD1	Carotenoid 9,10(9',10')-cleavage dioxygenase 1 (EC 1.14.99.n4) (AtCCD1) (Neoxanthin cleavage enzyme NC1) (AtNCED1)	0.397707	NaN	NaN	0.605773	0.0710552	NaN	NaN	0.0051176	13	13	13	35.3	35.3	35.3	60.907	36.894	30399000	14878000	15522000	0.627595	0.66664	NaN	0.523085	NaN	NaN	NaN	1.86316	NaN	NaN	0.482538	NaN	NaN	0.431114	NaN	NaN	0.504882	0.570522	0.0558037	0.459622
AT2G35040	O64767;Q8RWT5	At2g35040	AICARFT/IMPCHase bienzyme family protein (Putative phosphoribosylaminoimidazolecarboxamide formyltransferase)	-0.0172809	0.156833	0.0693698	0.379421	0.878315	0.269694	0.382962	0.0137792	13	13	13	40	40	40	59.471	323.31	63681000	34737000	28944000	0.424519	0.118622	0.258216	0.507405	0.588342	-0.153385	0.193774	0.0812833	0.0866349	0.138542	-0.00532047	-0.00742907	0.302345	0.0718535	0.422717	0.170618	0.0902551	-0.0356906	-0.189976	-0.121611
AT4G34200	O49485	PGDH1	D-3-phosphoglycerate dehydrogenase 1, chloroplastic (EC 1.1.1.95) (Protein EMBRYO SAC DEVELOPMENT ARREST 9)	-0.078505	-0.132785	-0.191799	-0.162662	0.261948	0.223043	0.047659	0.0566415	13	13	10	35.5	35.5	30.8	63.324	223.47	113790000	65478000	48314000	0.0236253	-0.167238	-0.174473	-0.200207	-0.295017	-0.055115	-0.0885282	-0.171034	-0.328541	-0.315778	-0.270512	-0.169256	0.0268083	-0.212564	-0.0383997	-0.0987754	-0.0863631	-0.0617588	-0.0661627	-0.0794649
AT5G52520	Q9FYR6	OVA6	Proline--tRNA ligase, chloroplastic/mitochondrial (EC 6.1.1.15) (Prolyl-tRNA Synthetase 1) (PRORS1) (Prolyl-tRNA synthetase) (ProRS) (Protein OVULE ABORTION 6)	0.136298	0.0401121	-0.140584	-0.162902	0.109375	0.715334	0.047659	0.0570479	13	13	13	35.5	35.5	35.5	60.746	97.503	50681000	27853000	22828000	NaN	-0.140433	-0.0623336	-0.195643	-0.253197	-0.047418	-0.133321	-0.127817	-0.148287	-0.246075	0.213968	-0.145787	0.0758011	0.00178126	0.0547973	0.128975	0.153035	0.195531	0.162458	0.0414921
AT1G65260	O80796	VIPP1	Membrane-associated protein VIPP1, chloroplastic (Protein VESICLE-INDUCING PROTEIN IN PLASTIDS 1)	-0.282937	0.0726472	0.348072	0.213494	0.266158	0.45403	0.0111926	0.0729501	13	13	13	46.1	46.1	46.1	36.392	323.31	178340000	91736000	86605000	0.0661954	0.130329	0.544961	0.215645	0.11034	0.464502	0.410312	0.225931	0.479196	0.160417	-0.0723566	0.130636	0.0175745	0.232212	0.0551702	-0.556975	-0.0269542	0.0602341	-0.0347782	-0.856212
AT2G17360;AT5G07090;AT5G58420	F4K5C7;Q93VH9;P49204;Q8VYK6;F4IMI7	At5g07090;RPS4A;RPS4B;RPS4D;At2g17360	40S ribosomal protein S4;40S ribosomal protein S4-1;40S ribosomal protein S4-2;40S ribosomal protein S4-3;Ribosomal protein S4 (RPS4A) family protein	-0.0330214	-0.154088	-0.211608	-0.100233	0.656719	0.317078	0.00908741	0.0762135	13	13	13	54.5	54.5	54.5	27.707	241.46	579500000	322490000	257010000	-0.1328	-0.0662001	-0.0399494	-0.138023	-0.124192	-0.254742	-0.209478	-0.237878	-0.14784	-0.208103	-0.122339	0.188953	-0.222069	-0.178213	-0.436773	-0.0994916	-0.00874774	-0.042473	0.0645428	-0.0789376
AT1G04420	Q8VZ23	At1g04420	NAD(P)-linked oxidoreductase superfamily protein	0.0728936	0.058597	0.362627	0.175502	0.431032	0.457815	0.0414761	0.146049	13	13	13	45.6	45.6	45.6	46.427	176.2	127780000	67126000	60657000	-0.0402711	0.170165	0.118169	0.533655	0.0957931	0.693413	0.182715	0.317939	0.0652432	0.553824	0.139728	0.104476	0.0528692	0.00706381	-0.0111521	0.0799609	-0.119856	0.152429	0.10393	0.148004
AT5G25780;AT5G27640	F4K4D5;Q9C5Z1;Q8GUM1	TIF3B1;EIF3B-2	Eukaryotic translation initiation factor 3 subunit B (eIF3b) (eIF-3-eta) (eIF3 p110);Eukaryotic translation initiation factor 3 subunit B (eIF3b) (eIF-3-eta) (eIF3 p110) (p82)	0.0148353	NaN	-0.179713	-0.0742706	0.943263	NaN	0.0187034	0.454984	13	13	13	25.6	25.6	25.6	84.913	50.349	46524000	25793000	20731000	0.0664462	-0.268551	0.00705242	-0.267337	0.0910366	-0.236475	-0.0942147	-0.175166	-0.168561	-0.224149	-0.349758	NaN	NaN	0.0946428	NaN	0.428755	-0.435468	-0.0885518	0.218641	-0.0491998
AT3G25520	Q8LBI1;F4J912	ATL5	60S ribosomal protein L5-1;Ribosomal protein L5	-0.0190238	0.0469976	-0.146593	-0.074964	0.790141	0.5368	0.0267667	0.462539	13	13	2	56.1	56.1	4.3	34.358	323.31	492840000	271970000	220870000	0.183809	-0.0996855	0.0136596	-0.305677	-0.166926	-0.162762	-0.130377	-0.193796	-0.154949	-0.0910818	0.0124639	-0.0330922	0.111205	0.0657727	0.0786386	-0.0231043	0.0258514	-0.00977009	-0.0962123	0.00811613
AT1G76160	Q9SGR6	sks5	AT1G76160 protein (SKU5 similar 5) (T23E18.10)	0.0677998	-0.0471242	0.837436	-0.0463003	0.451841	0.606687	0.0465153	0.906281	13	13	7	37.3	37.3	24.6	60.04	60.473	81221000	42504000	38717000	0.322992	NaN	0.398475	NaN	-0.860368	1.27213	NaN	0.332635	NaN	0.907544	0.017817	-0.0828949	0.0978737	-0.139727	-0.12869	0.0118656	0.187899	0.0943415	-0.0881879	0.133081
AT1G78570	Q9SYM5	RHM1	Trifunctional UDP-glucose 4,6-dehydratase/UDP-4-keto-6-deoxy-D-glucose 3,5-epimerase/UDP-4-keto-L-rhamnose-reductase RHM1 (Protein REPRESSOR OF LRX1 1) (Rhamnose biosynthetic enzyme 1) (AtRHM1) [Includes: UDP-glucose 4,6-dehydratase (EC 4.2.1.76);UDP-4-keto-6-deoxy-D-glucose 3,5-epimerase/UDP-4-keto-L-rhamnose 4-keto-reductase (EC 1.1.1.-) (EC 5.1.3.-)]	-0.123123	NaN	-0.466386	NaN	0.454687	NaN	0.00829916	NaN	13	13	6	25.3	25.3	11.5	75.371	71.851	41354000	23656000	17698000	NaN	NaN	NaN	NaN	NaN	-0.290079	-0.366403	-0.360326	-0.598074	-0.717048	-0.278691	NaN	NaN	-0.268654	NaN	0.335238	-0.131782	-0.246124	-0.294139	-0.27881
AT2G47450	O22265	CAO	Signal recognition particle 43 kDa protein, chloroplastic (Chromo protein SRP43) (CpSRP43)	0.0437309	0.705117	-0.33479	NaN	0.700262	0.177253	0.043821	NaN	13	13	13	64.1	64.1	64.1	41.279	187.81	88842000	45094000	43748000	NaN	NaN	NaN	NaN	NaN	-0.604387	-0.181516	-0.373224	-0.180035	NaN	0.115423	NaN	0.959519	0.148395	1.59713	-0.0144726	0.108789	0.0791349	-0.194625	0.239828
AT5G01410	Q8L940	PDX13	1) (PLP synthase subunit PDX1.3) (EC 4.3.3.6);Pyridoxal 5'-phosphate synthase subunit PDX1.3 (AtPDX1.3) (AtPDX1	0.328674	0.181881	0.670114	0.283278	0.110737	0.0703132	0.205881	0.0102022	14	10	10	73.1	58.9	58.9	33.216	143.25	89729000	44140000	45589000	NaN	0.244118	0.249488	0.278959	0.360545	0.331872	0.299069	2.444	0.230006	0.0456246	0.137211	0.221573	0.155535	0.212192	0.182892	0.394996	0.347857	-0.0595784	0.735398	0.224697
AT3G63490	Q9LY66;F4J296	RPL1;At3g63490	50S ribosomal protein L1, chloroplastic (CL1);Ribosomal protein	0.150011	0.0488623	0.107885	0.144293	0.119274	0.609753	0.0730207	0.025751	14	14	14	42.8	42.8	42.8	37.632	323.31	702910000	373760000	329150000	0.137768	0.175555	0.194141	0.125447	0.0885542	0.107769	0.0758866	0.0408957	0.154939	0.159934	0.11184	-0.0408377	0.14273	0.133472	-0.102893	0.186749	0.281706	0.159639	0.0574903	0.0644721
AT2G32240	F4ISU2	At2g32240	Early endosome antigen	-0.160127	-0.0748285	0.051401	-0.207104	0.323145	0.754949	0.618662	0.0305278	14	14	14	13.7	13.7	13.7	148.61	106.8	18050000	10563000	7486700	-0.00326574	-0.311023	-0.239444	-0.183611	-0.298176	0.0389098	0.351197	0.0312781	0.00657833	-0.170958	-0.340874	NaN	-0.346755	0.0680721	0.320243	-0.0990509	-0.124611	NaN	0.0482842	-0.465131
ATCG00340	P56767	psaB	Photosystem I P700 chlorophyll a apoprotein A2 (EC 1.97.1.12) (PSI-B) (PsaB)	-0.140295	-0.109074	-0.2458	-0.222506	0.393016	0.536354	0.136975	0.0238999	14	14	14	28.3	28.3	28.3	82.474	323.31	1347500000	775130000	572340000	-0.240387	-0.321959	-0.350915	-0.0846852	-0.114582	-0.718306	-0.0926487	-0.284233	-0.167157	0.0333442	-0.288287	NaN	-0.195472	0.265037	-0.217573	-0.195793	-0.476454	-0.206398	-0.0616807	0.238853
AT4G34490	O65902	CAP1	Cyclase-associated protein 1 (AtCAP1) (Adenylyl cyclase-associated protein)	0.197393	-0.244309	-0.292919	-0.257064	0.0610246	0.204978	0.146568	0.0289768	14	14	14	42.4	42.4	42.4	50.969	67.563	48100000	26528000	21573000	-0.317109	NaN	-0.249494	-0.0819555	-0.379696	0.0101936	-0.368887	NaN	NaN	-0.520065	0.0199331	-0.0110875	-0.228458	-0.357079	-0.644853	0.144893	0.294326	0.112849	0.219792	0.215105
AT2G27860	Q9ZUY6	AXS1	UDP-D-apiose/UDP-D-xylose synthase 1	0.0223047	-0.0871382	0.0284699	-0.316598	0.903748	0.65551	0.721875	0.0225102	14	3	3	47.3	11.8	11.8	43.637	83.622	27969000	15905000	12064000	-0.274857	-0.176171	-0.28829	NaN	-0.527076	0.189257	-0.0379623	NaN	-0.00900495	-0.0284101	-0.292038	NaN	0.122816	-0.359401	0.18007	0.507682	-0.0458031	-0.130482	-0.190477	-0.0293962
AT1G32900	Q9MAQ0	GBSS1	Granule-bound starch synthase 1, chloroplastic/amyloplastic (AtGBS1) (AtGBSS1) (EC 2.4.1.242) (Granule-bound starch synthase I) (GBSS-I)	-0.182842	-0.115986	-0.233611	-0.880967	0.103926	0.408955	0.441562	0.0106493	14	14	14	34.9	34.9	34.9	66.879	172.37	88149000	53734000	34415000	-0.73362	-1.18216	-0.436627	NaN	-1.17146	-0.0287866	NaN	NaN	-0.819579	0.147532	-0.027103	-0.308586	-0.240039	-0.189462	0.18526	-0.293512	-0.264099	-0.198896	-0.179951	0.0222474
AT5G14200	Q9FMT1;B9DHH9;F4K5H6	IMDH3;IMD1	3-isopropylmalate dehydrogenase 3, chloroplastic (3-IPM-DH 3) (IMDH 3) (EC 1.1.1.85) (Beta-IPM dehydrogenase 3);3-isopropylmalate dehydrogenase (EC 1.1.1.85);Isopropylmalate dehydrogenase 1	-0.125506	-0.117474	-0.178603	-0.145923	0.405502	0.241699	0.0221227	0.119447	14	14	7	53.5	53.5	33	44.161	256.71	140450000	79787000	60661000	-0.383244	-0.114724	0.0252289	-0.182504	-0.0743738	-0.125992	-0.148835	-0.231108	-0.122528	-0.26455	-0.290685	-0.110643	-0.00644432	-0.0639316	-0.115667	-0.363974	0.154892	-0.033229	-0.0111151	-0.374105
AT3G11630	Q96291	BAS1	2-Cys peroxiredoxin BAS1, chloroplastic (2-Cys Prx A) (2-Cys peroxiredoxin A) (EC 1.11.1.15) (Thiol-specific antioxidant protein A)	0.154955	0.149071	0.162977	0.0893851	0.129739	0.14411	0.0337782	0.125539	14	14	6	62	62	24.4	29.092	323.31	2353500000	1195200000	1158300000	0.0625523	0.196389	0.0546056	0.0919388	0.0414397	0.244502	0.123035	0.131166	0.0788481	0.237336	0.0484411	0.283189	0.148059	0.156733	0.108932	0.206806	0.272135	0.215518	0.0583328	0.0219828
AT5G20720	O65282	CPN21	20 kDa chaperonin, chloroplastic (Chaperonin 10) (Ch-CPN10) (Cpn10) (Chaperonin 20) (Protein Cpn21)	0.0207889	0.0289309	-0.139925	-0.0383121	0.77404	0.71959	0.0453268	0.465458	14	14	14	61.3	61.3	61.3	26.802	323.31	1490000000	805530000	684430000	-0.0602654	0.0474468	-0.0956478	-0.0607637	-0.0223306	-0.198182	-0.171992	-0.18957	-0.0791371	-0.0607419	0.00577733	0.0343991	0.00160652	-0.0130555	0.115927	0.0331147	0.0882841	-0.0325049	-0.00191373	0.0169644
AT1G33120;AT1G33140	P49209	RPL9B	60S ribosomal protein L9-1	0.0698486	-0.0293966	-0.185257	-0.0558001	0.398927	0.781923	0.0234068	0.467	14	14	10	63.4	63.4	53.6	22.017	323.31	789410000	429800000	359610000	-0.0586456	-0.00914429	0.11483	-0.232602	-0.0934385	-0.151426	-0.0682206	-0.234354	-0.218636	-0.253647	-0.103133	-0.0204162	-0.185521	0.0920058	0.0700816	0.208053	0.0214132	-0.0185976	0.055499	0.0828752
AT1G14810	Q8VYI4	At1g14810	Aspartate-semialdehyde dehydrogenase, putative (At1g14810/F10B6_6) (Semialdehyde dehydrogenase family protein)	0.161374	0.0416604	0.162416	0.0502255	0.135248	0.609753	0.0224287	0.560479	14	14	14	53.9	53.9	53.9	40.745	175.1	129030000	70422000	58613000	-0.184608	0.186143	0.0200137	0.164057	0.0655216	0.164476	0.191789	0.0993598	0.133458	0.222999	-0.0197276	-0.00996093	0.144186	0.0926023	0.0012022	0.0962015	0.332296	0.21651	0.00919157	0.152673
AT5G67030	Q9FGC7;Q9FGC7-2	ZEP	Zeaxanthin epoxidase, chloroplastic (AtZEP) (EC 1.14.15.21) (Protein ABA DEFICIENT 1) (AtABA1) (Protein IMPAIRED IN BABA-INDUCED STERILITY 3) (Protein LOW EXPRESSION OF OSMOTIC STRESS-RESPONSIVE GENES 6) (Protein NON-PHOTOCHEMICAL QUENCHING 2)	0.207258	0.10143	0.156728	-0.0073901	0.140052	0.452231	0.0310417	0.935136	14	14	14	27	27	27	73.841	49.512	64211000	34010000	30202000	-0.00966531	0.0926421	0.187766	-0.0622433	-0.24545	0.159835	0.246852	0.132184	0.0773731	0.167397	0.148593	0.127312	-0.130611	NaN	0.260426	0.0149567	0.18175	0.0958056	0.242066	0.501714
AT4G01310	O04603	RPL5	50S ribosomal protein L5, chloroplastic	0.089627	0.101414	0.157512	0.2321	0.271756	0.378766	0.063357	0.0115716	15	15	15	54.6	54.6	54.6	28.343	318.19	477570000	256700000	220860000	0.145231	0.342413	0.278221	0.195949	0.198687	0.0268647	0.312916	0.214014	0.0955319	0.138231	0.0211039	0.33952	0.0409397	-0.0317052	0.137213	0.209477	0.0984392	0.0615755	0.0408674	0.0377758
AT3G48420	Q94K71		CBBY-like protein (AtCbby) (EC 3.1.3.-)	0.0981191	0.0662651	0.256789	0.181258	0.342346	0.402643	0.0736496	0.0211479	15	15	15	55.8	55.8	55.8	34.245	232.98	298880000	150870000	148010000	0.082208	0.238592	0.252831	0.139632	0.193027	0.0359501	0.54314	0.448998	0.159593	0.0962643	0.0342576	0.0566157	0.00401309	0.108542	0.127897	0.234377	0.237116	0.0910224	-0.0180056	-0.0539145
ATCG00800	P56798	rps3	30S ribosomal protein S3, chloroplastic	0.12724	0.19331	-0.0425255	0.153807	0.185134	0.0716577	0.604531	0.0289679	15	15	15	66.1	66.1	66.1	25.188	288.06	372450000	191510000	180940000	0.161687	0.155917	0.244643	0.0605605	0.146227	-0.0120583	0.0480389	-0.159935	-0.20905	0.120377	0.270984	0.244059	0.145882	0.106289	0.199336	0.295004	0.0233527	0.131904	0.0635408	0.122399
AT4G18440	Q8RY94	At4g18440	Adenylosuccinate lyase (ASL) (EC 4.3.2.2) (Adenylosuccinase)	-0.00243806	-0.133679	-0.0666982	-0.245722	0.983519	0.268711	0.615042	0.0253516	15	15	9	38.1	38.1	26.1	59.757	176.03	196020000	99243000	96780000	-0.097423	-0.200859	-0.469088	-0.296885	-0.164353	0.291422	-0.13665	-0.166636	0.0533068	-0.374934	-0.165878	0.12398	-0.18155	-0.16437	-0.280577	-0.113723	-0.106113	0.175046	-0.0230715	0.0556712
AT2G30110	P93028	UBA1	Ubiquitin-activating enzyme E1 1 (AtUBA1) (EC 6.2.1.45) (Protein MODIFIER OF SNC1 5)	-0.428322	-0.367942	-0.213756	-0.275178	0.055814	0.237883	0.0352203	0.0513024	15	15	13	20.1	20.1	17.4	120.25	162.97	23921000	14912000	9008800	-0.18508	NaN	NaN	-0.435071	-0.205383	NaN	-0.113883	-0.28475	-0.171199	-0.285194	-0.280994	0.389685	-0.557359	-0.909405	-0.481636	NaN	-0.726524	-0.251464	-0.366635	-0.368667
AT5G14780	Q9S7E4	FDH1	Formate dehydrogenase, chloroplastic/mitochondrial (FDH) (EC 1.17.1.9) (NAD-dependent formate dehydrogenase)	0.0453342	-0.0433552	0.317521	0.162097	0.619334	0.770567	0.0181829	0.0583003	15	15	15	49	49	49	42.409	166.74	201790000	113800000	87989000	0.276664	0.0263595	0.277024	0.171657	0.0587797	NaN	0.322201	0.310249	0.320112	NaN	-0.234441	-0.275853	0.111453	0.0308348	0.15123	-0.110943	0.0533159	0.166476	-0.0177591	0.135581
AT3G18060	Q9LV35		Actin-interacting protein 1-2	-0.0467489	-0.107363	0.20594	0.0928017	0.6281	0.381089	0.0233722	0.101836	15	15	15	31.5	31.5	31.5	66.041	73.528	38797000	22453000	16344000	0.169436	0.0435163	0.120928	0.0570039	0.0731244	0.114225	0.122667	0.309249	0.183742	0.299815	-0.195109	NaN	0.0782139	-0.132971	-0.179586	0.078679	-0.0183048	-0.256135	0.0166282	-0.0546121
AT3G55800	P46283	SBP	Sedoheptulose-1,7-bisphosphatase, chloroplastic (EC 3.1.3.37) (SED(1,7)P2ase) (Sedoheptulose bisphosphatase) (SBPase)	0.163261	0.175629	0.179831	0.0710047	0.168932	0.0719959	0.0221227	0.204463	15	15	15	49.6	49.6	49.6	42.414	323.31	2340000000	1179600000	1160400000	0.0320649	0.0893616	0.0843922	0.157921	-0.008716	0.269264	0.140866	0.125529	0.130879	0.232619	0.223182	0.169443	0.185999	0.119687	0.179836	0.188149	0.204676	0.267043	-0.0986884	0.255124
AT4G21210	O49562;O49562-2	RP1	Pyruvate, phosphate dikinase regulatory protein 1, chloroplastic (EC 2.7.11.32) (EC 2.7.4.27) (Bifunctional dikinase regulatory protein 1) (AtRP1) (BFRP1) (Pyruvate, Pi dikinase regulatory protein 1) (PPDK RP1) (PPDK regulatory protein 1)	0.0432982	0.22551	0.258165	-0.0890276	0.594645	0.223043	0.0470765	0.24042	15	15	12	59.3	59.3	54.3	43.683	200.73	80215000	36590000	43625000	-0.201728	-0.118546	-0.201576	0.0423485	0.0343636	0.229949	0.0849552	0.12501	0.554947	0.295964	0.065563	0.152311	NaN	0.118019	0.566149	0.0596094	0.160161	0.057595	-0.0740398	0.0131653
AT1G50480	Q9SPK5	THFS	Formate--tetrahydrofolate ligase (EC 6.3.4.3) (10-formyletrahydrofolate synthetase) (FHS) (FTHFS) (Formyltetrahydrofolate synthetase)	-0.142295	-0.195414	-0.15076	-0.0938671	0.137642	0.0703132	0.0364316	0.294053	15	15	15	40.1	40.1	40.1	67.801	291.52	118720000	69859000	48863000	-0.0377968	-0.0923135	0.0991988	-0.109405	-0.329019	-0.069097	-0.201149	-0.101441	-0.159773	-0.222338	-0.303146	-0.132408	-0.146403	-0.204215	-0.190896	-0.0496156	-0.0667141	-0.283524	-0.182409	-0.129212
AT4G16155	F4JLP5	LPD2	Dihydrolipoyl dehydrogenase 2, chloroplastic (ptLPD2) (EC 1.8.1.4) (Dihydrolipoamide dehydrogenase 2) (Protein LIPOAMIDE DEHYDROGENASE 2) (Pyruvate dehydrogenase complex E3 subunit 2) (E3-2) (PDC-E3 2)	0.154053	0.282564	-0.0110982	0.129416	0.114105	0.0960348	0.842663	0.0487684	16	16	8	41.3	41.3	22.2	60.144	323.31	231300000	124220000	107080000	0.116035	0.212606	0.061505	0.174902	0.0820344	0.0329536	0.0871641	-0.0718693	-0.0770268	-0.0267126	0.217944	0.0170947	0.252165	0.380547	0.545069	0.291646	0.180209	0.0304838	0.134967	0.132958
AT3G16000	Q9LW85	MFP1	MAR-binding filament-like protein 1	-0.0432597	0.0221854	0.0466003	-0.198052	0.603142	0.899085	0.433352	0.0393659	16	16	16	24.2	24.2	24.2	81.972	68.238	79374000	42051000	37323000	-0.0939605	-0.354746	-0.29064	-0.207423	-0.0434891	0.170082	0.0685796	0.0151458	-0.0533362	0.0325304	0.372186	NaN	-0.0446203	-0.107837	-0.130987	-0.00975303	0.0983501	-0.115388	-0.126077	-0.0634304
AT5G38430	P10796	RBCS-1B	Ribulose bisphosphate carboxylase small chain 1B, chloroplastic (RuBisCO small subunit 1B) (EC 4.1.1.39)	-0.139588	-0.183573	-0.134063	-0.236272	0.327572	0.103537	0.0857765	0.0120753	16	4	4	69.6	20.4	20.4	20.286	323.31	2930800000	1611000000	1319800000	-0.304833	-0.339268	-0.173793	-0.140542	-0.222923	-0.216004	-0.26168	-0.109957	-0.0389273	-0.0437447	-0.106325	-0.0832799	-0.250009	-0.313207	-0.165046	0.0109301	-0.0563033	-0.0428291	-0.516825	-0.0929133
AT5G15650	Q9LFW1	RGP2	UDP-arabinopyranose mutase 2 (EC 5.4.99.30) (Reversibly glycosylated polypeptide 2) (AtRGP2) (UDP-L-arabinose mutase 2)	-0.16618	-0.139441	-0.339953	-0.145328	0.338807	0.170964	0.0111926	0.102895	16	16	8	65.3	65.3	37.5	40.89	176.17	105110000	62375000	42731000	-0.143328	0.0101431	-0.349954	-0.0516179	-0.191881	-0.236809	-0.197953	-0.544428	-0.412016	-0.308561	-0.121657	-0.0702307	-0.277461	-0.174011	-0.0538473	0.145947	-0.0246738	-0.402855	-0.508379	-0.0409417
AT2G31610	Q9SIP7	RPS3A	40S ribosomal protein S3-1	0.0507799	-0.100484	-0.186851	-0.121597	0.545509	0.293204	0.0132917	0.148256	16	16	3	70.8	70.8	23.6	27.519	323.31	607120000	326170000	280950000	-0.152278	-0.11637	0.100606	-0.256497	-0.183448	-0.181113	-0.235522	-0.15173	-0.223902	-0.141987	-0.0224052	-0.19484	-0.079298	-0.212363	0.00648776	-0.111554	0.0679537	0.0707581	0.137826	0.0889157
AT1G55480	Q94BS2	ZKT	Protein MET1, chloroplastic (PDZ domain, K-box domain, and TPR region containing protein)	0.0991052	0.109105	0.145114	0.0755621	0.393016	0.209942	0.0470765	0.194607	16	16	16	54.9	54.9	54.9	37.41	323.31	561880000	289660000	272220000	-0.0179763	0.0923572	0.0361545	0.0990731	0.168202	0.199162	0.246627	0.120864	0.0830824	0.075837	0.189359	0.0710615	0.0856809	0.0459945	0.153431	0.193585	0.0523818	0.246237	-0.167284	0.170606
AT1G12900	F4HNZ6	GAPA-2	Glyceraldehyde 3-phosphate dehydrogenase A subunit 2	NaN	0.131861	0.193386	0.0965145	NaN	0.214915	0.0292582	0.264665	16	1	1	64.7	5.4	5.4	34.332	87.428	27752000	13783000	13969000	-0.0774881	-0.0509164	0.212968	0.222064	0.175945	0.23691	0.123752	0.201259	NaN	0.211623	0.0464302	0.143604	0.193281	0.14413	NaN	NaN	NaN	NaN	NaN	NaN
AT1G78830	Q9ZVA2	F9K20.12	EP1-like glycoprotein 2 (Curculin-like (Mannose-binding) lectin family protein)	0.0927887	0.0640786	0.215436	0.0602183	0.485287	0.583624	0.0145108	0.426153	16	16	11	47.7	47.7	34.5	50.342	323.31	391450000	216260000	175200000	0.164795	-0.124065	-0.00498566	0.142121	0.123226	0.297582	0.258468	0.228548	0.0984075	0.194175	0.294438	-0.0103832	-0.151438	0.0975452	0.0902312	0.276441	0.0367173	0.129904	-0.230475	0.251356
AT3G01480	Q9SSA5;Q9SSA5-2	CYP38	Peptidyl-prolyl cis-trans isomerase CYP38, chloroplastic (PPIase CYP38) (EC 5.2.1.8) (Rotamase CYP38) (Thylakoid lumen PPIase)	0.0180769	0.0422182	0.154525	0.0277021	0.855936	0.646473	0.0447165	0.638	16	16	16	57.4	57.4	57.4	47.981	323.31	604170000	323720000	280450000	0.0096662	0.054998	-0.086351	0.120126	0.0400713	0.0778567	0.277371	0.184968	0.0864177	0.146013	0.135801	-0.081474	0.0861858	0.11626	-0.045682	-0.123625	0.0464564	0.115146	-0.098245	0.150652
ATCG00540	P56771	petA	Cytochrome f	0.144464	0.341873	0.123386	0.246455	0.134119	0.113647	0.287084	0.0156319	17	17	17	58.4	58.4	58.4	35.356	323.31	2495100000	1293600000	1201400000	0.185157	0.216664	0.113158	0.337923	0.379372	-0.211095	0.271098	0.163425	0.0832458	0.310256	0.321747	0.791267	0.0703255	0.375714	0.150312	0.175651	0.27909	0.160435	0.0407252	0.0664165
AT2G40490	O22886	HEME2	Uroporphyrinogen decarboxylase 2, chloroplastic (UPD2) (URO-D2) (EC 4.1.1.37)	0.0265074	0.215378	0.0862777	0.160023	0.719807	0.0679404	0.192532	0.0224577	17	17	17	68	68	68	43.579	323.31	377810000	204580000	173230000	0.229621	0.17784	0.175983	0.111121	0.10555	0.227532	0.0603947	-0.0169178	0.0702685	0.0901113	0.165603	0.247596	0.170371	0.15199	0.341329	0.0386163	0.0452561	0.026982	-0.0663667	0.0880492
AT4G26970	Q94A28	ACO3	Aconitate hydratase 2, mitochondrial (Aconitase 2) (mACO2) (EC 4.2.1.3) (Citrate hydro-lyase 2)	0.0111303	-0.0347901	0.127303	0.135422	0.892653	0.771724	0.134344	0.04051	17	15	15	30.5	28.9	28.9	108.48	91.482	41975000	23364000	18611000	0.0673869	0.0919296	0.197679	0.200467	0.119648	0.131094	NaN	NaN	0.113696	0.137118	-0.253366	0.0346722	0.141881	-0.0783237	-0.018814	0.0253872	0.0539894	0.0419141	-0.111712	0.0460728
AT5G58330	Q9LVL7;Q8H1E2;F4KEX3	At5g58330	Malate dehydrogenase [NADP], chloroplastic (EC 1.1.1.82) (NADP-MDH);Malate dehydrogenase (EC 1.1.1.37)	0.00626286	0.00753842	0.19582	0.0736859	0.938232	0.94007	0.0465939	0.1552	17	17	17	57.7	57.7	57.7	48.229	323.31	277740000	142250000	135490000	0.060937	0.0840683	0.0942802	0.119565	0.00957896	0.217957	0.393068	0.149542	0.172938	0.045593	-0.163382	0.107205	0.0645728	-0.0665725	0.0958688	0.0689225	-0.0336054	-0.0363319	-0.057669	0.0899981
AT5G03940	P37107	FFC	Signal recognition particle 54 kDa protein, chloroplastic (54 chloroplast protein) (54CP) (SRP54) (cpSRP54) (FFC)	-0.19729	0.0598371	0.150481	0.0312457	0.0649068	0.559956	0.047659	0.601675	17	17	17	37.2	37.2	37.2	61.232	217.28	195050000	107500000	87547000	-0.0113193	-0.0142752	0.128881	-0.0501018	0.103044	0.162228	0.177533	0.0133753	0.239042	0.160227	0.168746	-0.160229	0.133357	0.0392974	0.118014	-0.194851	-0.281429	-0.166203	-0.0787145	-0.265251
AT1G80380	A8MQE0;F4HS63;Q944I4;Q944I4-2	At1g80380;GLYK	D-glycerate 3-kinase, chloroplastic (AtGLYK) (EC 2.7.1.31);p-loop containing nucleoside triphosphate hydrolases superfamily protein	0.111541	0.217317	0.282363	-0.162982	0.388557	0.0730504	0.00485854	0.65063	17	17	17	54.9	54.9	54.9	40.819	323.31	198660000	107380000	91279000	-1.4504	0.134625	0.15646	0.138663	0.205742	0.327739	0.31641	0.237781	0.320944	0.208941	0.240037	0.307342	0.312736	0.17301	0.0534622	0.285752	0.231038	0.199264	-0.1849	0.0265504
AT5G56500	C0Z361	CPN60B3	Chaperonin 60 subunit beta 3, chloroplastic (CPN-60 beta 3)	NaN	NaN	-0.442434	NaN	NaN	NaN	0.00840641	NaN	17	1	1	30.7	1.8	1.8	63.324	5.0813	2164300	1148500	1015800	NaN	NaN	NaN	-0.450321	-0.340834	NaN	-0.351636	-0.552922	-0.32103	-0.544147	NaN	NaN	NaN	NaN	NaN	-0.112295	-0.131451	NaN	NaN	NaN
AT5G30510	Q93VC7	RPS1	30S ribosomal protein S1, chloroplastic (Plastid ribosomal protein S1) (PRPS1)	0.165247	0.146808	0.0939765	0.131741	0.103568	0.122734	0.243729	0.0471366	18	18	18	56	56	56	45.11	323.31	810280000	425770000	384510000	0.145528	0.0677231	0.231761	0.0820353	0.131659	0.0852189	0.240735	0.0657881	-0.0957415	0.173882	0.247697	0.0937733	0.108847	0.156664	0.127057	0.307525	0.207843	0.0810193	0.164589	0.0652611
AT1G18080	O24456;O24456-2	RACK1A	Receptor for activated C kinase 1A (Guanine nucleotide-binding protein subunit beta-like protein A) (WD-40 repeat auxin-dependent protein ARCA)	-0.0293071	-0.13029	-0.0797846	-0.127388	0.708307	0.170964	0.157171	0.0451685	18	18	15	67.9	67.9	60.9	35.747	323.31	557150000	312230000	244920000	-0.147008	-0.183019	-0.0520555	-0.167598	-0.0872586	-0.094598	-0.0162465	-0.0375754	-0.163988	-0.0865151	-0.0565249	-0.189744	-0.11586	-0.0657858	-0.223534	0.0576506	-0.120668	-0.0873795	0.0180965	-0.0142353
AT4G11150	Q39258	VHA-E1	V-type proton ATPase subunit E1 (V-ATPase subunit E1) (Protein EMBRYO DEFECTIVE 2448) (Vacuolar H(+)-ATPase subunit E isoform 1) (Vacuolar proton pump subunit E1)	-0.232737	-0.0858652	-0.150263	-0.106869	0.0658148	0.275702	0.0233722	0.0590955	18	18	18	69.1	69.1	69.1	26.06	218.54	454930000	257250000	197680000	-0.163955	-0.123254	-0.0777501	-0.0857041	-0.0836813	-0.11784	-0.18342	-0.187069	-0.143523	-0.119464	-0.0978462	-0.152842	-0.0767529	-0.0378242	-0.0640607	-0.246996	-0.0951261	-0.151081	-0.248421	-0.42206
AT1G32060	P25697	PRK	Phosphoribulokinase, chloroplastic (PRK) (PRKase) (EC 2.7.1.19) (Phosphopentokinase)	0.160243	0.0701521	0.178808	0.0467203	0.0939715	0.356963	0.0256507	0.477797	18	18	18	62.5	62.5	62.5	44.463	323.31	3447000000	1760900000	1686000000	-0.0692414	0.108653	-0.0491463	0.123209	0.120127	0.251262	0.26822	0.129014	0.132634	0.112908	0.0874133	0.0693303	0.0816359	0.0114098	0.100971	0.136808	0.277125	0.15154	0.053552	0.18219
AT5G41790	F4JZY1	CIP1	COP1-interactive protein 1	0.0372308	0.096887	NaN	0.274643	0.840603	0.534394	NaN	0.0121393	19	19	19	15.3	15.3	15.3	181.98	41.38	10512000	5569200	4942500	0.384828	0.229031	0.372251	0.10872	0.278385	NaN	NaN	NaN	0.368293	NaN	-0.0554104	NaN	-0.0995357	0.352027	0.190467	NaN	0.0235714	-0.0759344	0.405977	-0.204691
AT1G04410	P93819	MDH1	Malate dehydrogenase 1, cytoplasmic (EC 1.1.1.37) (Cytosolic NAD-dependent malate dehydrogenase 1) (cNAD-MDH1) (Cytosolic malate dehydrogenase 1) (Cytosolic MDH1)	-0.25576	-0.0699951	-0.152227	-0.166453	0.0516907	0.476266	0.0682921	0.0145602	19	19	10	80.1	80.1	52.7	35.571	323.31	959520000	548620000	410890000	-0.200042	-0.147129	-0.146575	-0.162846	-0.175674	0	-0.291676	-0.209453	-0.117369	-0.142636	-0.201012	-0.0639474	0.128709	-0.103876	-0.109849	-0.246487	-0.224342	-0.128357	-0.445986	-0.233626
AT5G19770;AT5G19780	Q56WH1;B9DHQ0	TUBA3;TUBA5	Tubulin alpha-3 chain;Tubulin alpha-5 chain	0.0599889	-0.0985391	-0.15597	-0.17765	0.641475	0.368682	0.0547412	0.04051	19	8	6	63.6	30.9	22.4	49.654	323.31	386320000	239380000	146930000	-0.11138	-0.0753429	-0.355539	-0.131479	-0.214509	-0.0285298	-0.136314	-0.191995	-0.127055	-0.295958	0.0246427	-0.0252455	-0.150233	-0.31158	-0.0302795	0.17741	0.0747875	0.0106688	-0.243221	0.280299
AT4G38970	Q944G9;F4JUJ5	FBA2	Fructose-bisphosphate aldolase 2, chloroplastic (AtFBA2) (EC 4.1.2.13);Fructose-bisphosphate aldolase (EC 4.1.2.13)	0.185732	0.152123	0.227839	0.149552	0.0665312	0.103537	0.0114872	0.0863618	19	19	12	71.6	71.6	54.5	42.987	323.31	6897900000	3540200000	3357700000	-0.0823011	0.204322	0.232836	0.188878	0.204023	0.232363	0.196405	0.320068	0.130756	0.259602	0.084943	0.134335	0.195856	0.181768	0.163713	0.292346	0.2267	0.16448	0.0869648	0.158171
AT1G03630	F4I2F8;O48741	POR C;PORC	Protochlorophyllide reductase C, chloroplastic (PCR C) (EC 1.3.1.33) (NADPH-protochlorophyllide oxidoreductase C) (POR C);NADPH-protochlorophyllide oxidoreductase (EC 1.3.1.33)	0.06312	0.0613203	0.125813	0.184232	0.450829	0.443341	0.147871	0.0346681	20	16	16	57.6	52.1	52.1	43.625	323.31	190600000	98451000	92144000	0.152616	0.238978	0.230942	0.00825444	0.290372	-0.015538	0.0880789	0.278387	0.0250966	0.25304	0.0438087	0.0763754	0.104119	-0.0408338	0.123132	0.164482	0.0974299	0.119638	-0.03094	-0.0350099
AT3G26650	P25856	GAPA1	Glyceraldehyde-3-phosphate dehydrogenase GAPA1, chloroplastic (EC 1.2.1.13) (NADP-dependent glyceraldehydephosphate dehydrogenase A subunit 1)	-0.0157264	0.193252	-0.00238707	-0.117393	0.851945	0.0936184	0.965842	0.04051	20	7	7	61.9	29.5	29.5	42.489	323.31	1795900000	933330000	862560000	-0.1489	-0.0964982	-0.0844707	-0.132281	-0.124817	0.137117	-0.106168	-0.0178496	0.00184417	-0.0268789	0.0827645	0.338636	0.201692	0.221047	0.122121	0.0827641	-0.095245	0.0561549	-0.109214	-0.013092
AT5G09810	P53492	ACT7	Actin-7 (Actin-2)	0.0650487	-0.114877	-0.105024	-0.167944	0.473807	0.368682	0.255316	0.0247379	20	12	5	74.5	50.7	22.8	41.735	323.31	451060000	245280000	205780000	-0.185952	-0.145314	-0.0867513	-0.14598	-0.275721	0.0846105	-0.25935	0.0363107	-0.192327	-0.194363	0.150823	-0.262274	-0.0312803	-0.236472	-0.195184	-0.052084	0.148456	0.117454	-0.0609944	0.172412
AT4G14960	P29511;B9DFF8	TUBA6;TUA6	Tubulin alpha chain;Tubulin alpha-6 chain	-0.125984	-0.308845	-0.199004	-0.274603	0.215586	0.060581	0.0505473	0.00824138	20	20	1	68	68	3.1	49.537	323.31	1444300000	833270000	610980000	-0.240051	-0.143416	-0.316466	-0.337782	-0.335298	0.0284087	-0.304543	-0.277414	-0.17148	-0.269994	-0.134816	-0.402962	-0.207085	-0.519576	-0.279785	-0.0455051	-0.161749	-0.181449	-0.271437	0.0302205
AT1G37130	P11035	NIA2	Nitrate reductase [NADH] 2 (NR2) (EC 1.7.1.1)	-0.0198217	0.0831156	-0.306203	-0.296174	0.82668	0.708113	0.136975	0.0334828	20	20	20	30	30	30	102.84	69.837	70691000	41650000	29041000	-0.133472	NaN	-0.168592	-0.483998	-0.398632	-0.364836	NaN	NaN	-0.00433162	-0.549442	-0.0632468	NaN	0.0717282	-0.193158	0.517139	0.079896	0.0214132	-0.0169977	-0.191784	0.00836423
AT5G15450	Q9LF37	CLPB3	Chaperone protein ClpB3, chloroplastic (ATP-dependent Clp protease ATP-binding subunit ClpB homolog 3) (Casein lytic proteinase B3) (Protein ALBINO OR PALE GREEN 6)	0.11663	0.240466	0.208416	0.243792	0.141977	0.0729355	0.0453268	0.0570479	20	20	19	31.4	31.4	30.1	108.94	245	68958000	35428000	33529000	0.0826215	0.275082	0.485879	0.378595	-0.00321873	0.234772	0.418465	0.18957	0.15373	0.0455455	0.261659	0.121669	0.0938627	0.389533	0.335606	0.117438	0.124379	0.111524	0.182174	0.0476336
AT5G26000	P37702;P37702-2	TGG1	Myrosinase 1 (EC 3.2.1.147) (Beta-glucosidase 38) (AtBGLU38) (EC 3.2.1.21) (Sinigrinase 1) (Thioglucosidase 1)	-0.0360025	0.0493596	0.246103	0.122043	0.773465	0.735705	0.0137611	0.0810717	20	19	19	45.5	43.4	43.4	61.132	323.31	2276200000	1219500000	1056600000	0.151059	0.252942	0.10778	0.0185705	0.0798655	0.322211	0.188816	0.244103	0.354092	0.121293	0.0357546	-0.260263	0.247321	0.206843	0.0171423	0.110881	-0.00483729	-0.0470918	-0.330008	0.0910437
ATCG00120	P56757	atpA	ATP synthase subunit alpha, chloroplastic (EC 3.6.3.14) (ATP synthase F1 sector subunit alpha) (F-ATPase subunit alpha)	0.137122	0.0694109	0.195162	0.131722	0.180396	0.386441	0.0215315	0.0685366	21	20	20	59.2	57.8	57.8	55.328	323.31	9309900000	4818300000	4491600000	0.0129679	0.218363	0.16102	0.206293	0.0599639	0.316156	0.165363	0.184765	0.102137	0.207387	0.0600681	0.0605089	0.159259	0.00936294	0.0578554	0.297377	0.128279	0.183927	-0.0211666	0.0971937
AT1G48030	Q9M5K3	LPD1	Dihydrolipoyl dehydrogenase 1, mitochondrial (AtmLPD1) (mtLPD1) (EC 1.8.1.4) (Dihydrolipoamide dehydrogenase 1) (Glycine cleavage system L protein 1) (Pyruvate dehydrogenase complex E3 subunit 1) (E3-1) (PDC-E3 1)	0.0747791	0.0708463	0.277697	0.110266	0.403553	0.423641	0.00616631	0.0798063	21	21	15	58.6	58.6	43.2	53.987	323.31	944580000	489030000	455550000	-0.00502229	0.112592	0.133374	0.166233	0.144152	0.238512	0.217954	0.347739	0.351382	0.232897	0.0579467	-0.046429	0.195272	0.0519546	0.0954873	0.19135	0.151606	0.0770453	-0.0720152	0.0259096
AT3G63140	Q9LYA9	CSP41A	Chloroplast stem-loop binding protein of 41 kDa a, chloroplastic (CSP41-a)	0.136305	0.116937	0.221856	0.113909	0.208176	0.172252	0.0131707	0.0916317	21	21	21	67.7	67.7	67.7	43.929	323.31	2004900000	1024100000	980790000	0.021017	0.224227	0.0444227	0.116897	0.16298	0.259436	0.268932	0.25444	0.235699	0.0907707	0.150779	0.0890491	0.178798	0.0663432	0.0997164	0.316776	0.0778612	0.178497	-0.0444184	0.152811
AT4G13930	O23254	SHM4	Serine hydroxymethyltransferase 4 (AtSHMT4) (EC 2.1.2.1) (Glycine hydroxymethyltransferase 4) (Serine methylase 4)	-0.134283	-0.238836	-0.314039	-0.159271	0.154012	0.0703132	0.00355287	0.126217	21	21	20	59.4	59.4	58	51.717	258.74	294610000	163600000	131010000	-0.246997	-0.222711	-0.237198	0.155323	-0.24477	-0.378356	-0.24767	-0.310888	-0.322087	-0.311192	-0.259848	-0.403184	-0.102265	-0.193952	-0.234932	-0.0749248	-0.109451	-0.1374	-0.294408	-0.0552301
AT3G08590	Q9M9K1		Probable 2,3-bisphosphoglycerate-independent phosphoglycerate mutase 2 (BPG-independent PGAM 2) (Phosphoglyceromutase 2) (EC 5.4.2.12) (PGAM-I 2)	-0.1301	-0.0367314	0.226609	0.0553136	0.121386	0.862746	0.0265545	0.33994	21	14	14	66.6	47	47	60.763	243.44	88592000	47558000	41033000	0.0723094	0.129357	-0.0465933	0.108295	0.0131999	0.178868	0.0762121	0.25536	0.400165	0.222439	0.019803	-0.495762	0.286727	0.12724	-0.121665	-0.0740042	-0.064802	-0.153953	-0.147397	-0.210343
AT1G09780	O04499	PGM1	2,3-bisphosphoglycerate-independent phosphoglycerate mutase 1 (BPG-independent PGAM 1) (Phosphoglyceromutase 1) (EC 5.4.2.12) (PGAM-I 1)	-0.158112	-0.055381	-0.171786	-0.0545977	0.18936	0.512453	0.0157064	0.451861	21	21	14	54.8	54.8	35	60.579	323.31	275690000	158030000	117670000	-0.146911	0.140839	-0.0527984	-0.112088	-0.102031	-0.204515	-0.174034	-0.198868	-0.164656	-0.116859	-0.187163	-0.071053	0.0341529	-0.0525363	-0.000305712	0.00552659	-0.111474	-0.394976	-0.223034	-0.0666029
AT1G63940	P92947-2;P92947;F4I576;F4I577	MDAR6	Monodehydroascorbate reductase, chloroplastic/mitochondrial (EC 1.6.5.4) (Monodehydroascorbate reductase 5, mitochondrial) (AtMDAR5) (Monodehydroascorbate reductase 6, chloroplastic) (AtMDAR6);Monodehydroascorbate reductase 6	-0.103061	-0.0416255	-0.154157	0.0196775	0.208176	0.671894	0.0292582	0.806744	21	21	21	58.2	58.2	58.2	52.501	323.31	612760000	340970000	271790000	-0.159351	0.0754431	0.117092	0.140877	-0.0756736	-0.0902522	-0.13965	-0.20978	-0.213501	-0.117603	-0.199894	-0.0807493	0.0147928	0.097149	-0.0394258	-0.0165173	-0.105377	-0.133747	-0.194486	-0.0651764
AT3G23810	Q9LK36	SAHH2	Adenosylhomocysteinase 2 (AdoHcyase 2) (EC 3.3.1.1) (S-adenosyl-L-homocysteine hydrolase 1) (SAH hydrolase 2)	-0.118771	-0.175991	-0.328672	0.010904	0.218247	0.427876	0.0115808	0.901922	21	7	7	62.3	25.8	25.8	53.159	125.53	125840000	73157000	52684000	0.200995	-0.0223223	-0.068093	NaN	-0.0669636	-0.356007	-0.420917	-0.444194	-0.0983732	-0.323868	-0.0638672	NaN	-0.00201074	-0.653312	0.0152275	-0.0484451	-0.140616	-0.164892	-0.260277	0.020375
AT2G33210	F4IVR2;Q8L7B5	HSP60-2	Chaperonin CPN60-like 1, mitochondrial (HSP60-like 1);Heat shock protein 60-2	0.0193474	-0.027099	NaN	0.192581	0.785563	0.820178	NaN	0.0124029	22	10	10	51.6	28.6	28.6	61.477	88.01	40860000	25156000	15704000	0.126321	0.18641	0.200488	0.257694	0.191993	NaN	0.135253	NaN	0.148312	NaN	-0.058138	NaN	0.0598256	0.0502622	-0.160346	0.0076938	0.0986914	-0.0231404	-0.000718832	0.0142111
AT5G35630	Q43127	GLN2	Glutamine synthetase, chloroplastic/mitochondrial (EC 6.3.1.2) (GS2) (Glutamate--ammonia ligase)	0.113392	0.0211139	0.158604	0.0341209	0.280813	0.812383	0.0372071	0.60252	22	22	20	71.6	71.6	68.4	47.41	323.31	4884300000	2552700000	2331500000	-0.111687	0.0738996	0.041678	0.152034	0.0146801	0.243971	0.181825	0.164594	0.036162	0.166467	-0.0439902	0.0444661	0.089337	-0.0558773	0.0716341	0.22546	0.0790498	0.229064	-0.0926231	0.126009
AT2G36530	P25696	ENO2	Bifunctional enolase 2/transcriptional activator (EC 4.2.1.11) (2-phospho-D-glycerate hydro-lyase 2) (2-phosphoglycerate dehydratase 2) (LOW EXPRESSION OF OSMOTICALLY RESPONSIVE GENES 1)	-0.123483	-0.0951984	-0.205161	-0.113997	0.162299	0.295166	0.0111926	0.0655967	23	23	22	77.3	77.3	75.7	47.719	323.31	1424800000	803390000	621450000	-0.166189	-0.0550773	-0.110653	-0.0545757	-0.183488	-0.178795	-0.209919	-0.254319	-0.24359	-0.13918	-0.168044	-0.136598	0.051965	-0.136271	-0.0870438	-0.0877479	-0.0700954	-0.160636	-0.246714	-0.0522218
AT1G13440	Q9FX54;F4HQT1	GAPC2	Glyceraldehyde-3-phosphate dehydrogenase GAPC2, cytosolic (EC 1.2.1.12) (NAD-dependent glyceraldehydephosphate dehydrogenase C subunit 2);Glyceraldehyde-3-phosphate dehydrogenase C2	-0.0936051	-0.0990435	-0.155458	-0.11184	0.281435	0.341205	0.0420105	0.0685366	23	23	2	78.1	78.1	9.8	36.913	323.31	3190200000	1777500000	1412700000	-0.123254	-0.0816152	-0.149855	-0.0262455	-0.178228	-0.0272462	-0.173518	-0.22088	-0.216267	-0.139377	-0.242457	-0.164829	0.0742752	-0.0333607	-0.128846	-0.0618747	-0.0463936	-0.1203	-0.23494	-0.00451741
AT2G38040	Q9LD43	CAC3	Acetyl-coenzyme A carboxylase carboxyl transferase subunit alpha, chloroplastic (ACCase subunit alpha) (Acetyl-CoA carboxylase carboxyltransferase subunit alpha) (EC 2.1.3.15)	-0.0578272	-0.0619059	-0.222727	-0.165176	0.437981	0.43932	0.0220603	0.0825434	23	23	23	42.9	42.9	42.9	85.305	323.31	190490000	102660000	87838000	0.0465731	-0.157818	-0.352696	-0.126162	-0.235779	-0.219774	-0.156952	-0.400867	-0.182477	-0.153564	-0.134599	0.0213715	-0.111208	-0.0634482	-0.021646	-0.106359	0.019283	-0.0845315	-0.000816345	-0.116712
AT3G52930	Q9LF98	F8J2_100	Fructose-bisphosphate aldolase 8, cytosolic (AtFBA8) (EC 4.1.2.13) (Cytosolic aldolase 1) (cAld1)	-0.124406	-0.0731664	-0.117256	-0.11738	0.129335	0.484482	0.0669671	0.0427803	24	24	15	84.1	84.1	51.4	38.539	323.31	1244900000	697460000	547470000	-0.153714	-0.0776338	-0.144323	-0.104528	-0.106701	-0.115195	-0.221541	-0.0954329	-0.0621597	-0.0919517	-0.111733	-0.165252	0.14685	-0.0375472	-0.19815	-0.0532397	-0.0809089	-0.171551	-0.165671	-0.150658
AT2G36460	Q9SJQ9;B3H6D7	At2g36460	Fructose-bisphosphate aldolase 6, cytosolic (AtFBA6) (EC 4.1.2.13) (Cytosolic aldolase 2) (cAld2);Fructose-bisphosphate aldolase (EC 4.1.2.13)	-0.107972	-0.183131	-0.0878923	-0.210948	0.204706	0.175023	0.167227	0.0214065	24	15	14	78.8	46.1	43.3	38.386	281.03	252130000	147660000	104470000	-0.215923	-0.236732	-0.316208	-0.240235	-0.0456399	-0.0840498	-0.139692	0.0141469	-0.0394408	-0.190426	-0.296487	-0.397887	0.0247029	-0.10927	-0.136713	0.0118656	-0.0833642	-0.129599	-0.149584	-0.18918
AT2G29550	P29515	TUBB7	Tubulin beta-7 chain (Beta-7-tubulin)	-0.316784	-0.374665	-0.0335973	-0.373436	0.180396	0.055536	0.920611	0.0136194	24	8	4	78.4	30.5	14.9	50.747	137.69	56171000	30113000	26057000	-0.342978	-0.327915	NaN	NaN	-0.449415	0.0319843	-0.482226	-0.499961	1.11492	-0.332704	-0.154911	-0.38516	-0.314379	-0.628286	-0.390588	-0.162142	-0.116925	-0.220849	-0.956743	-0.127261
AT5G42270	Q9FH02	FTSH5	ATP-dependent zinc metalloprotease FTSH 5, chloroplastic (AtFTSH5) (EC 3.4.24.-) (Protein VARIEGATED 1)	0.182783	0.339627	0.22364	0.23758	0.0808694	0.0595994	0.0584322	0.0214504	25	25	7	48.4	48.4	14.9	75.231	323.31	1108700000	569690000	539060000	0.220424	0.126715	0.132721	0.423504	0.284534	0.0936208	0.454523	0.248387	0.0177481	0.303921	0.240317	0.561992	0.164168	0.476551	0.255107	0.185965	0.250531	0.208696	0.0256789	0.243043
AT4G38510	F4JTQ0;Q9SZN1	At4g38510;VHA-B2	ATPase, V1 complex, subunit B protein;V-type proton ATPase subunit B2 (V-ATPase subunit B2) (Vacuolar H(+)-ATPase subunit B isoform 2) (Vacuolar proton pump subunit B2)	-0.523181	-0.281541	-0.181515	-0.200049	0.120226	0.125087	0.0866822	0.0497968	25	3	3	71.1	7.3	7.3	55.177	22.441	33412000	20944000	12468000	-0.213332	NaN	-0.153919	NaN	-0.232896	-0.149016	-0.262617	-0.132913	NaN	NaN	-0.414647	NaN	-0.235727	NaN	-0.19425	-1.35511	-0.496574	-0.51473	-0.159644	-0.0898458
AT1G29880	O23627-2;O23627	GLYRS-1	Glycine--tRNA ligase, mitochondrial 1 (EC 6.1.1.14) (Diadenosine tetraphosphate synthetase) (AP-4-A synthetase) (Glycyl-tRNA synthetase 1) (GlyRS-1)	0.0118923	0.174425	-0.0545523	-0.264627	0.907778	0.452231	0.562323	0.032895	25	25	25	45.9	45.9	45.9	77.23	205.08	178840000	97414000	81428000	-0.178301	-0.584142	-0.191961	-0.15061	-0.218123	-0.00242569	0.0701602	-0.311195	0.0999508	-0.129252	0.0820012	0.0180616	0.0705807	0.835285	-0.133803	-0.0786131	-0.128426	-0.00710424	0.0958369	0.177768
AT3G15730	Q38882	PLDALPHA1	Phospholipase D alpha 1 (AtPLDalpha1) (PLD alpha 1) (EC 3.1.4.4) (Choline phosphatase 1) (PLDalpha) (Phosphatidylcholine-hydrolyzing phospholipase D 1)	-0.0567267	-0.149247	-0.0865399	-0.1537	0.465555	0.172252	0.258928	0.0211479	26	26	21	49.1	49.1	41.4	91.847	323.31	313380000	178060000	135320000	-0.11961	-0.124976	-0.142553	-0.193427	-0.187935	0.0868943	-0.184806	-0.024569	-0.197674	-0.112545	-0.00984672	-0.153075	-0.0719574	-0.287227	-0.224129	0.0262964	-0.140178	-0.0789566	-0.10903	0.0182349
AT1G56190	F4I3L1;P50318	At1g56190	Phosphoglycerate kinase 2, chloroplastic (EC 2.7.2.3);Phosphoglycerate kinase (EC 2.7.2.3)	0.152218	0.0809032	0.23592	0.124103	0.103688	0.427912	0.0115975	0.0644613	26	12	11	83.2	50.4	46.7	42.615	323.31	537350000	270950000	266400000	0.0957929	0.0515132	0.102943	0.251432	0.118832	0.355558	0.269375	0.184968	0.160901	0.2088	0.0954165	0.203839	-0.00940741	-0.0784051	0.193073	0.142675	0.17149	0.237327	0.0212446	0.188351
AT2G05710	Q9SIB9	ACO2	Aconitate hydratase 3, mitochondrial (Aconitase 3) (mACO1) (EC 4.2.1.3) (Citrate hydro-lyase 3)	0.0705681	0.00498746	0.23382	0.190394	0.494629	0.97305	0.0300187	0.106463	26	19	19	41.7	32.2	32.2	108.2	167.24	66811000	37258000	29553000	0.268617	0.0528173	0.507922	0.103621	0.0189918	0.106396	0.250686	NaN	0.251706	0.326493	-0.288267	-0.1025	0.0823952	-0.00826088	0.34157	0.15872	0.177402	0.0955591	-0.174634	0.0957934
AT1G42970	P25857	GAPB	Glyceraldehyde-3-phosphate dehydrogenase GAPB, chloroplastic (EC 1.2.1.13) (NADP-dependent glyceraldehydephosphate dehydrogenase B)	0.178913	0.0970456	0.208896	0.0986348	0.103374	0.259047	0.0131664	0.186292	26	26	21	70.9	70.9	60.6	47.659	323.31	6304500000	3162000000	3142600000	-0.0889921	0.146066	0.152463	0.211438	0.072199	0.286141	0.187946	0.159436	0.146454	0.264503	0.0409741	0.123211	0.167392	0.141634	0.012017	0.298632	0.196659	0.212395	-0.0133509	0.200229
AT1G76030	P11574	VHA-B1	V-type proton ATPase subunit B1 (V-ATPase subunit B1) (V-ATPase 57 kDa subunit) (Vacuolar H(+)-ATPase subunit B isoform 1) (Vacuolar proton pump subunit B1)	0.0365798	-0.0186801	0.0296735	0.141086	0.668757	0.818855	0.722751	0.0485223	28	28	2	82.7	82.7	10.3	54.107	323.31	882890000	464760000	418140000	0.070017	0.0507948	0.158218	0.237146	0.189252	0.257463	0.00998279	-0.029566	-0.123638	0.0341258	0.00372247	0.0263221	-0.0622745	-0.0414683	-0.0197022	0.112705	0.117879	0.0450288	-0.123235	0.0305212
AT4G37930	Q9SZJ5	SHM1	Serine hydroxymethyltransferase 1, mitochondrial (AtSHMT1) (EC 2.1.2.1) (Glycine hydroxymethyltransferase 1) (Serine Transhydroxymethyltransferase) (STM) (Serine methylase 1)	0.267822	0.181747	0.17931	0.116291	0.0658148	0.0730504	0.028676	0.111919	28	28	18	74.5	74.5	47.6	57.4	323.31	3948100000	1979000000	1969100000	-0.0025419	0.186811	0.0807425	0.255014	0.0614303	0.19353	0.165516	0.212976	0.052028	0.2725	0.108693	0.153568	0.218598	0.163115	0.264759	0.435109	0.351971	0.337132	0.0540448	0.160852
AT5G40450	F4KHD5	At5g40450	A-kinase anchor-like protein	-0.0590113	-0.358275	NaN	-0.297462	0.495108	0.0817074	NaN	0.0253516	29	29	29	15.9	15.9	15.9	323	84.887	21253000	12922000	8330300	-0.255911	-0.623952	-0.226549	-0.167495	-0.213401	-0.0360458	-0.0076355	NaN	NaN	NaN	-0.241092	NaN	-0.239312	-0.293495	-0.659202	0.0173639	-0.194078	-0.043745	-0.126848	0.0522505
AT4G01800	Q9SYI0;F4JG57	SECA1;AGY1	Protein translocase subunit SECA1, chloroplastic (AtcpSecA) (Protein ALBINO OR GLASSY YELLOW 1);Albino or Glassy Yellow 1	0.101727	0.109383	0.282575	0.0716218	0.260539	0.275702	0.0420105	0.381878	29	29	29	39.2	39.2	39.2	115.18	206.35	92733000	50534000	42199000	0.125799	-0.0604854	0.0602218	-0.0436606	0.276234	0.290136	-0.0513914	0.375844	0.347248	0.451036	0.0117443	0.0505536	0.0423712	0.274769	0.167475	0.0534112	-0.0113552	0.173426	0.0724187	0.220733
AT1G22530	Q56ZI2	PATL2	Patellin-2	-0.163346	-0.153253	-0.141053	-0.194631	0.0830947	0.194769	0.129401	0.0145307	30	27	27	57	51.8	51.8	76.007	305.68	120820000	70097000	50727000	-0.144223	-0.122906	-0.21554	-0.274585	-0.215901	0.0602591	-0.148201	-0.121832	-0.153837	-0.341655	-0.0858238	-0.120808	0.00133883	-0.357598	-0.203375	-0.175361	-0.159991	-0.122664	-0.268499	-0.0902136
AT5G49910	Q9LTX9	HSP70-7	Heat shock 70 kDa protein 7, chloroplastic (Chloroplast heat shock protein 70-2) (cpHsc70-2) (Heat shock protein 70-7) (AtHsp70-7)	0.198982	0.173123	0.0990652	0.126645	0.0649068	0.0799882	0.106716	0.0447224	33	33	12	52.9	52.9	23.8	76.996	323.31	1805800000	923370000	882410000	0.0401785	0.158506	0.107535	0.165145	0.161862	0.144824	0.128957	-0.0130002	0.108142	0.126403	0.177814	0.216047	0.196441	0.0788029	0.19651	0.238568	0.312477	0.209123	0.112608	0.122135
AT3G46970	Q9SD76	PHS2	Alpha-glucan phosphorylase 2, cytosolic (AtPHS2) (EC 2.4.1.1) (Alpha-glucan phosphorylase, H isozyme) (Starch phosphorylase H)	0.0168097	-0.0466694	-0.0865388	-0.164402	0.855936	0.574615	0.174776	0.0265549	38	38	37	68.8	68.8	66.9	95.158	323.31	643370000	353480000	289890000	-0.233318	-0.0631336	-0.174835	-0.124997	-0.225724	-0.021532	-0.110792	-0.156991	-0.161728	0.0183492	-0.0720792	0.0263221	0.00174034	-0.172642	-0.0166884	0.134671	-0.00512424	0.07589	-0.149935	0.0285466
AT3G43520	Q94A32	FAX2	Protein FATTY ACID EXPORT 2, chloroplastic (At-FAX2)	0.121257	0.0752903	-0.00500552	0.128282	0.382931	0.599253	0.947078	0.0601535	1	1	1	8.3	8.3	8.3	24.767	99.31	16829000	8840600	7988100	0.010601	0.13504	0.116292	0.220494	0.158985	-0.052893	0.0723556	-0.0535452	-0.155956	0.165011	NaN	NaN	0.202507	0.0925481	-0.0691841	-0.199273	0.163143	0.0376543	0.330529	0.274233
AT5G54960	Q9FFT4	PDC2	Pyruvate decarboxylase 2 (AtPDC2) (EC 4.1.1.1)	NaN	-0.0731599	NaN	-0.159887	NaN	0.528706	NaN	0.0627291	1	1	1	3.3	3.3	3.3	65.817	39.021	6893600	3693100	3200400	-0.107271	-0.286486	-0.105046	-0.140744	NaN	NaN	NaN	NaN	NaN	NaN	-0.166896	NaN	0.107231	-0.0719905	-0.160984	NaN	NaN	NaN	NaN	-0.166038
AT3G10090;AT5G03850	Q9SR73	RPS28A	40S ribosomal protein S28-1	0.043301	-0.308576	NaN	0.207827	0.871472	0.349514	NaN	0.146049	1	1	1	18.8	18.8	18.8	7.3705	40.977	102300000	53896000	48400000	-0.00660485	NaN	0.268832	0.361253	NaN	NaN	0.236599	0.452496	NaN	NaN	0.335536	-0.771632	0.00881408	-0.192498	-0.9231	0.154921	-0.633195	-0.0956759	0.361729	0.428726
AT1G08490	Q93WX6	NFS2	Cysteine desulfurase 1, chloroplastic (EC 2.8.1.7) (NIFS-like protein 1) (CpNifS1) (Plastid sufS-like protein) (Protein AtCpNifS) (Selenocysteine lyase) (EC 4.4.1.16)	0.17172	NaN	NaN	0.100384	0.0900172	NaN	NaN	0.333888	1	1	1	6	6	6	50.485	7.8513	4428100	2427500	2000500	0.243354	NaN	NaN	0.0612621	-0.00346263	NaN	NaN	NaN	NaN	NaN	NaN	NaN	0.0661092	NaN	NaN	0.161282	0.084873	0.273186	0.0840719	0.255188
AT3G19320	Q9LT85	At3g19320	Leucine-rich repeat (LRR) family protein	NaN	0.528459	NaN	0.252091	NaN	0.44386	NaN	0.451861	1	1	1	2.2	2.2	2.2	54.971	9.3471	21546000	10326000	11219000	0.0490935	0.910421	NaN	NaN	-0.203241	NaN	NaN	-0.501213	NaN	NaN	1.07691	NaN	-0.645993	NaN	1.15446	-0.27108	NaN	1.55531	NaN	NaN
AT4G24780	Q9C5M8		Probable pectate lyase 18 (EC 4.2.2.2) (Pectate lyase A10)	NaN	NaN	NaN	0.0407167	NaN	NaN	NaN	0.735107	1	1	1	3.7	3.7	3.7	45.013	10.767	5630400	3274400	2356000	NaN	-0.150009	-0.0810168	0.0903646	0.303528	NaN	NaN	NaN	NaN	NaN	NaN	NaN	NaN	NaN	0.060653	NaN	NaN	NaN	NaN	NaN
AT1G22710	Q39231	SUC2	Sucrose transport protein SUC2 (Sucrose permease 2) (Sucrose transporter 1) (Sucrose-proton symporter 2)	0.102779	NaN	NaN	0.0174136	0.708572	NaN	NaN	0.814288	1	1	1	3.1	3.1	3.1	54.546	13.004	7042700	3836000	3206800	-0.0615671	-0.0604536	0.101063	NaN	0.0906123	-0.153315	NaN	-0.123355	NaN	NaN	NaN	NaN	NaN	NaN	NaN	-0.293092	0.115359	0.48607	NaN	NaN
AT2G40110	F4IGY8;Q8LE51	At2g40110	Protein yippee-like	NaN	NaN	NaN	0.00199625	NaN	NaN	NaN	0.983808	1	1	1	16.4	16.4	16.4	12.759	3.3827	43453000	24399000	19054000	-0.123731	0.073452	-0.116527	NaN	0.174791	NaN	NaN	NaN	NaN	NaN	NaN	NaN	NaN	NaN	NaN	NaN	NaN	NaN	NaN	NaN
AT5G51545	F4KDA6	LPA2	Protein LOW PSII ACCUMULATION 2, chloroplastic	NaN	NaN	0.242871	NaN	NaN	NaN	0.0690519	NaN	1	1	1	10.8	10.8	10.8	20.213	29.396	4154000	2407700	1746300	NaN	NaN	0.0835207	NaN	NaN	NaN	0.36165	0.244252	0.12271	NaN	NaN	NaN	NaN	NaN	NaN	-0.127196	NaN	NaN	NaN	-0.012724
AT2G26500	A8MQ99;O48717	At2g26500	At2g26500/T9J22.17 (Cytochrome b6f complex subunit (PetM)) (Expressed protein);Cytochrome b6f complex subunit (PetM)	NaN	NaN	-0.23753	NaN	NaN	NaN	0.155763	NaN	1	1	1	11.8	11.8	11.8	9.9284	5.1336	7578100	3450400	4127700	-0.258448	NaN	NaN	NaN	0.150977	-0.459715	-0.0185618	-0.234312	NaN	NaN	NaN	NaN	NaN	NaN	NaN	NaN	NaN	NaN	NaN	NaN
AT3G15010	Q9LKA4	UBA2C	UBP1-associated protein 2C	NaN	NaN	0.0816426	NaN	NaN	NaN	0.340463	NaN	1	1	1	4	4	4	41.779	3.5954	815360	429610	385760	NaN	NaN	NaN	NaN	NaN	NaN	0.0492737	0.0302382	0.165416	NaN	NaN	NaN	NaN	NaN	NaN	NaN	NaN	NaN	NaN	NaN
AT2G24090	Q8VZ55	At2g24090	50S ribosomal protein L35, chloroplastic	0.112216	-0.0491842	0.0679148	NaN	0.807775	0.754949	0.722751	NaN	1	1	1	9.7	9.7	9.7	16.089	47.341	42544000	20961000	21582000	NaN	0.0763079	NaN	NaN	0.465845	-0.541762	0.0554688	0.18071	0.446138	0.199019	-0.0397456	0.165086	-0.293461	-0.0286162	NaN	NaN	-0.589131	-0.123596	0.0421219	1.11947
AT5G64140	P34789	RPS28C	40S ribosomal protein S28-2	0.261166	0.511393	NaN	NaN	0.272841	0.0937614	NaN	NaN	1	1	1	18.8	18.8	18.8	7.3404	20.149	51863000	26846000	25018000	NaN	NaN	NaN	NaN	NaN	0.334745	NaN	NaN	NaN	0.278436	0.568347	NaN	0.749131	NaN	0.2167	0.45175	-0.32067	0.0854478	0.56713	0.522174
AT4G02620	Q9ZQX4	VHA-F	V-type proton ATPase subunit F (V-ATPase subunit F) (V-ATPase 14 kDa subunit) (Vacuolar H(+)-ATPase subunit F) (Vacuolar proton pump subunit F)	0.38492	0.201812	NaN	NaN	0.197628	0.169432	NaN	NaN	1	1	1	8.6	8.6	8.6	14.259	2.85	8374600	4041400	4333200	NaN	NaN	0.347335	0.254758	NaN	NaN	0.354376	0.322194	NaN	NaN	0.181149	NaN	0.253964	0.170324	NaN	NaN	0.18133	0.171293	0.802137	NaN
AT4G39690	Q9ASV5	At4g39690	AT4g39690/T19P19_80 (MICOS complex subunit)	-0.0214997	-0.121221	NaN	NaN	0.82668	0.367982	NaN	NaN	1	1	1	2.5	2.5	2.5	70.552	43.438	5509800	3067700	2442100	NaN	NaN	NaN	-0.0604616	-0.682096	NaN	NaN	NaN	NaN	NaN	-0.0839522	NaN	-0.0585031	-0.221208	NaN	NaN	-0.0735015	-0.0839905	0.0985016	-0.0270083
AT1G74730	Q94F10	At1g74730	Transmembrane protein, putative (DUF1118)	NaN	0.0653178	NaN	NaN	NaN	0.763043	NaN	NaN	1	1	1	6.6	6.6	6.6	20.735	69.189	55795000	30972000	24824000	NaN	NaN	NaN	NaN	0.0624625	NaN	0.00560302	NaN	-0.149673	NaN	NaN	NaN	-0.119086	0.351891	-0.0368515	NaN	NaN	-0.120497	NaN	-0.224851
AT1G71920;AT5G10330	A8MRI5;F4IBL7;P0DI07;B9DHD3	HISN6B;HISN6A	Histidinol-phosphate aminotransferase 1, chloroplastic (EC 2.6.1.9) (Gene duplicate 1-B protein) (Imidazole acetol-phosphate transaminase) (Protein EMBRYO DEFECTIVE 2196) (Protein HISTIDINE BIOSYNTHESIS 6A);"Histidinol-phosphate aminotransferase 2, chloroplastic (EC 2.6.1.9) (Gene duplicate 1-A protein) (Imidazole acetol-phosphate transaminase) (Protein HISTIDINE BIOSYNTHESIS 6B)";HISTIDINE BIOSY…	NaN	0.0300933	NaN	NaN	NaN	0.850161	NaN	NaN	1	1	1	5.5	5.5	5.5	40.665	15.122	3854600	2276000	1578600	NaN	NaN	NaN	NaN	NaN	NaN	NaN	NaN	NaN	NaN	0.136236	NaN	0.0676438	-0.1136	NaN	NaN	NaN	NaN	NaN	-0.0976294
AT2G45440	Q9FVC8	DHDPS2	4-hydroxy-tetrahydrodipicolinate synthase 2, chloroplastic (HTPA synthase 2) (EC 4.3.3.7)	0.616042	NaN	NaN	NaN	0.0516907	NaN	NaN	NaN	1	1	1	4.1	4.1	4.1	40.292	11.909	3744400	2046900	1697600	NaN	NaN	NaN	NaN	NaN	NaN	NaN	NaN	NaN	NaN	NaN	NaN	NaN	NaN	NaN	NaN	0.384948	0.618382	NaN	0.844797
AT5G39590	Q9FKA3	At5g39590	TLD-domain containing nucleolar protein	-0.302267	NaN	NaN	NaN	0.0658148	NaN	NaN	NaN	1	1	1	2.8	2.8	2.8	59.908	4.7954	2533100	1536400	996700	NaN	NaN	NaN	NaN	NaN	NaN	NaN	NaN	NaN	NaN	NaN	NaN	NaN	NaN	NaN	NaN	-0.436822	-0.403487	-0.209788	-0.15897
AT1G54410	Q9SLJ2	F20D21.23	Dehydrin HIRD11 (Histidine-rich dehydrin of 11 kDa) (AtHIRD11) (Protein SRC1 homolog)	0.298048	NaN	NaN	NaN	0.0778427	NaN	NaN	NaN	1	1	1	12.2	12.2	12.2	10.796	7.6861	155350000	78944000	76401000	NaN	NaN	NaN	NaN	NaN	NaN	NaN	NaN	NaN	NaN	NaN	1.01889	NaN	NaN	NaN	0.201881	0.0193927	0.309238	0.565171	0.394556
AT3G60880	Q9LZX6-2;Q9LZX6	DHDPS1	4-hydroxy-tetrahydrodipicolinate synthase 1, chloroplastic (HTPA synthase 1) (EC 4.3.3.7)	0.424078	NaN	NaN	NaN	0.103568	NaN	NaN	NaN	1	1	1	4.1	4.1	4.1	40.464	4.1348	3012400	1739100	1273400	NaN	NaN	NaN	NaN	NaN	NaN	NaN	NaN	NaN	NaN	NaN	NaN	NaN	NaN	NaN	NaN	NaN	0.415745	0.681643	0.174846
AT3G02410	Q1PET6-2		Probable isoprenylcysteine alpha-carbonyl methylesterase ICMEL2 (EC 3.1.1.n2) (Isoprenylcysteine methylesterase-like protein 2)	0.228973	NaN	NaN	NaN	0.103688	NaN	NaN	NaN	1	1	1	4.8	4.8	4.8	39.362	3.3458	6219000	3028200	3190800	NaN	NaN	NaN	NaN	0.187315	0.384902	NaN	NaN	NaN	NaN	NaN	NaN	NaN	NaN	0.712897	0.196476	0.251999	0.238444	NaN	NaN
AT1G43190	A8MR27;Q6ICX4	PTB3	Polypyrimidine tract-binding protein 3;Polypyrimidine tract-binding protein homolog 3	0.353886	NaN	NaN	NaN	0.110737	NaN	NaN	NaN	1	1	1	5.3	5.3	5.3	48.02	7.9239	2944100	1444000	1500100	NaN	NaN	NaN	NaN	NaN	NaN	NaN	NaN	NaN	NaN	NaN	NaN	NaN	NaN	NaN	NaN	0.585963	0.194669	NaN	0.281026
AT4G25890	Q9SVZ6	RPP3A	60S acidic ribosomal protein P3-1	0.220791	NaN	NaN	NaN	0.113225	NaN	NaN	NaN	1	1	1	15.1	15.1	15.1	11.849	86.997	2788300	1501300	1287000	NaN	NaN	NaN	NaN	NaN	NaN	NaN	NaN	NaN	NaN	NaN	NaN	NaN	NaN	NaN	NaN	0.243571	NaN	0.243548	0.175254
AT4G39040	F4JV86;Q9SVI9	At4g39040;F19H22.140	At4g39040 (RNA-binding CRS1 / YhbY (CRM) domain protein);RNA-binding CRS1 / YhbY (CRM) domain protein	0.203575	NaN	NaN	NaN	0.146808	NaN	NaN	NaN	1	1	1	6.1	6.1	6.1	31.562	13.119	5141800	2828300	2313400	NaN	NaN	NaN	NaN	NaN	NaN	NaN	NaN	-0.0978383	-0.304522	NaN	NaN	NaN	NaN	NaN	-0.0678818	0.206054	0.188196	0.464034	0.227471
AT1G19140	Q9LMB2;F4IE14	T29M8.1;At1g19140	T29M8.1 protein (Ubiquinone biosynthesis COQ9-like protein);Ubiquinone biosynthesis COQ9-like protein	0.195673	NaN	NaN	NaN	0.150448	NaN	NaN	NaN	1	1	1	7.4	7.4	7.4	34.341	25.023	1140900	593580	547320	NaN	NaN	NaN	NaN	NaN	NaN	NaN	NaN	NaN	NaN	NaN	NaN	NaN	0.226196	NaN	NaN	0.263691	NaN	0.177163	0.146166
AT5G66550	F4K0M7	At5g66550	Maf-like protein	0.157681	NaN	NaN	NaN	0.168952	NaN	NaN	NaN	1	1	1	11.6	11.6	11.6	22.565	9.7692	6267900	3319100	2948800	NaN	NaN	NaN	NaN	NaN	NaN	NaN	NaN	NaN	NaN	NaN	NaN	NaN	NaN	NaN	NaN	0.127436	0.260049	0.0321262	0.211114
AT5G44400	Q9FKU8	At5g44400	Berberine bridge enzyme-like 26 (AtBBE-like 26) (EC 1.1.1.-)	0.237819	NaN	NaN	NaN	0.177057	NaN	NaN	NaN	1	1	1	3.2	3.2	3.2	60.345	2.5697	61809000	31875000	29934000	NaN	NaN	NaN	NaN	NaN	NaN	NaN	NaN	NaN	NaN	NaN	NaN	NaN	NaN	NaN	NaN	0.158454	0.131047	0.423957	NaN
AT1G45474	Q9C639	F2G19.4	Photosystem I chlorophyll a/b-binding protein 5, chloroplastic (Lhca5) (LHCI type III LHCA5)	-0.17641	NaN	NaN	NaN	0.221502	NaN	NaN	NaN	1	1	1	14.1	14.1	14.1	27.802	17.384	3951000	2296200	1654700	NaN	NaN	NaN	NaN	0.33487	NaN	NaN	NaN	NaN	NaN	NaN	NaN	NaN	NaN	NaN	NaN	-0.290571	-0.166721	-0.0719383	NaN
AT4G21445	Q8W1B3	PRIP	At4g21445 (Putative receptor-interacting protein) (Receptor-interacting protein)	-0.305764	NaN	NaN	NaN	0.239255	NaN	NaN	NaN	1	1	1	13.6	13.6	13.6	17.618	13.902	6668000	3538500	3129500	NaN	NaN	NaN	NaN	NaN	NaN	NaN	NaN	NaN	NaN	NaN	NaN	NaN	NaN	NaN	-0.325056	-0.798691	0.0707425	-0.17005	NaN
AT3G21750	Q9LSY9	UGT71B1	UDP-glycosyltransferase 71B1 (EC 2.4.1.-) (Flavonol 3-O-glucosyltransferase UGT71B1) (EC 2.4.1.91)	0.11164	NaN	NaN	NaN	0.264854	NaN	NaN	NaN	1	1	1	3.4	3.4	3.4	52.666	12.671	1490500	836970	653500	NaN	NaN	NaN	NaN	NaN	NaN	NaN	NaN	NaN	NaN	NaN	NaN	NaN	NaN	NaN	NaN	0.0919552	0.0259314	0.123406	0.205266
AT3G14110	F4JFR2;F4JFR1;Q940U6	FLU	Protein FLUORESCENT IN BLUE LIGHT, chloroplastic;Tetratricopeptide repeat (TPR)-like superfamily protein	-0.118662	NaN	NaN	NaN	0.328819	NaN	NaN	NaN	1	1	1	6.9	6.9	6.9	25.718	2.8333	5326900	3020100	2306800	NaN	NaN	NaN	NaN	NaN	NaN	NaN	NaN	NaN	NaN	NaN	NaN	NaN	NaN	NaN	NaN	NaN	-0.125193	-0.0446948	-0.186098
AT5G05270	Q8VZW3	CHI3	Probable chalcone--flavonone isomerase 3 (Chalcone isomerase 3) (EC 5.5.1.6) (Chalcone isomerase-like 1)	0.118675	NaN	NaN	NaN	0.337663	NaN	NaN	NaN	1	1	1	9.1	9.1	9.1	23.331	195.03	3521500	1854600	1666900	NaN	NaN	NaN	NaN	NaN	NaN	NaN	NaN	NaN	NaN	NaN	NaN	NaN	NaN	NaN	NaN	0.032856	0.169933	0.299292	-0.02738
AT4G09720	F4JKR7;F4JKR6;Q948K8-2;Q948K8	RABG3A	RAB GTPase homolog G3A;Ras-related protein RABG3a (AtRABG3a) (Ras-related protein Rab76) (AtRab76)	-0.106799	NaN	NaN	NaN	0.343177	NaN	NaN	NaN	1	1	1	6.6	6.6	6.6	23.368	8.1799	4854600	2775100	2079500	NaN	NaN	NaN	NaN	NaN	NaN	NaN	NaN	NaN	NaN	NaN	NaN	NaN	NaN	NaN	NaN	-0.148764	-0.0996921	NaN	-0.0719398
AT3G05020	P11829	ACP1	Acyl carrier protein 1, chloroplastic (ACP-1)	-0.576126	NaN	NaN	NaN	0.39224	NaN	NaN	NaN	1	1	1	13.1	13.1	13.1	15.055	37.705	4281700	2454400	1827300	NaN	NaN	NaN	NaN	NaN	NaN	NaN	-0.370841	NaN	-0.300314	NaN	NaN	NaN	NaN	NaN	NaN	-1.35283	NaN	0.532886	-0.908434
AT5G13560	Q8GY46		At5g13560 (Structural maintenance of chromosomes protein)	-0.066349	NaN	NaN	NaN	0.437981	NaN	NaN	NaN	1	1	1	2.1	2.1	2.1	76.65	11.612	1910700	1103300	807390	NaN	NaN	NaN	NaN	NaN	NaN	NaN	NaN	NaN	NaN	NaN	NaN	NaN	NaN	NaN	NaN	-0.0691286	-0.105968	-0.0848768	-0.00542265
AT3G21055	Q39195	PSBT	Photosystem II 5 kDa protein, chloroplastic (PSII-T) (Nuclear encoded psbT) (PsbTn)	-0.256197	NaN	NaN	NaN	0.446186	NaN	NaN	NaN	1	1	1	11.7	11.7	11.7	11.028	7.719	8676100	4796600	3879500	NaN	NaN	NaN	NaN	NaN	NaN	NaN	NaN	NaN	NaN	NaN	NaN	NaN	-0.413962	NaN	0.43219	-0.322417	-0.281262	-0.8533	NaN
AT3G52720	O04846-3;O04846-2;O04846	ACA1	Alpha carbonic anhydrase 1, chloroplastic (AtaCA1) (AtalphaCA1) (EC 4.2.1.1) (Alpha carbonate dehydratase 1)	-0.101732	NaN	NaN	NaN	0.486319	NaN	NaN	NaN	1	1	1	6.4	6.4	6.4	21.752	11.378	3355600	1923100	1432600	NaN	NaN	NaN	NaN	NaN	NaN	NaN	NaN	NaN	NaN	NaN	NaN	NaN	NaN	NaN	-0.330542	-0.245053	-0.12039	0.272315	-0.084992
AT2G19750;AT4G29390;AT5G56670	P49689	RPS30A	40S ribosomal protein S30	-0.626128	NaN	NaN	NaN	0.537559	NaN	NaN	NaN	1	1	1	16.1	16.1	16.1	6.887	2.5855	15804000	6722400	9081300	NaN	NaN	NaN	NaN	NaN	NaN	-0.246109	-0.236751	NaN	NaN	NaN	NaN	NaN	NaN	NaN	-0.484933	-2.24894	NaN	0.855488	NaN
AT2G22250	Q9SIE1-2;Q9SIE1	PAT	Bifunctional aspartate aminotransferase and glutamate/aspartate-prephenate aminotransferase (AtAAT) (AtPPA-AT) (EC 2.6.1.1) (EC 2.6.1.78) (EC 2.6.1.79) (Protein MATERNAL EFFECT EMBRYO ARREST 17)	0.0510421	NaN	NaN	NaN	0.540757	NaN	NaN	NaN	1	1	1	4.7	4.7	4.7	46.038	3.886	3685100	1889100	1796100	NaN	NaN	NaN	-0.0747446	-0.0526708	NaN	NaN	NaN	NaN	NaN	NaN	NaN	0.0363752	-0.0869957	NaN	NaN	0.0419114	-0.00119392	0.0927333	0.0707178
AT3G26740	Q96500	CCL	Light-regulated protein 1, chloroplastic (Protein CCR-LIKE, chloroplastic)	0.0871379	NaN	NaN	NaN	0.556665	NaN	NaN	NaN	1	1	1	12.8	12.8	12.8	15.314	124.88	9194100	5637400	3556700	NaN	NaN	NaN	NaN	NaN	-0.0700549	NaN	NaN	NaN	NaN	NaN	-0.587194	NaN	NaN	NaN	NaN	NaN	-0.0180974	0.00640506	0.273106
AT3G10380	Q93YU5	SEC8	Exocyst complex component SEC8 (AtSec8) (Exocyst complex component 4)	-0.157508	NaN	NaN	NaN	0.583189	NaN	NaN	NaN	1	1	1	1.5	1.5	1.5	116.6	12.727	1438600	844840	593790	NaN	NaN	NaN	NaN	NaN	NaN	NaN	NaN	NaN	NaN	NaN	NaN	NaN	NaN	NaN	NaN	-0.605473	NaN	-0.0664432	0.199393
AT4G12600;AT5G20160	F4K456;Q9SU26;Q94AF6;F4K455;F4JRD3	At5g20160;At4g12600	AT4g12600/T1P17_190 (Ribosomal protein L7Ae-like) (Ribosomal protein L7Ae/L30e/S12e/Gadd45 family protein);AT5g20160/F5O24_50 (Ribosomal protein L7Ae-like) (Ribosomal protein L7Ae/L30e/S12e/Gadd45 family protein);Ribosomal protein L7Ae/L30e/S12e/Gadd45 family protein	-0.144914	NaN	NaN	NaN	0.722614	NaN	NaN	NaN	1	1	1	22	22	22	12.127	46.811	7420100	4164900	3255200	NaN	NaN	NaN	NaN	0.324359	NaN	NaN	NaN	NaN	NaN	NaN	NaN	NaN	NaN	NaN	NaN	0.15703	0.247208	-0.83898	NaN
AT1G29350;AT1G29370	Q8VZT4;F4I1G1	At1g29350	RNA polymerase II degradation factor-like protein (DUF1296)	0.0204811	NaN	NaN	NaN	0.85302	NaN	NaN	NaN	1	1	1	2	2	2	90.887	8.8576	4564600	2385300	2179400	NaN	NaN	NaN	NaN	NaN	NaN	NaN	NaN	-0.0187091	NaN	NaN	NaN	NaN	NaN	NaN	-0.00882132	0.0693019	0.000962712	NaN	NaN
AT4G34730	O65693		Probable ribosome-binding factor A, chloroplastic	-0.0244517	NaN	NaN	NaN	0.872561	NaN	NaN	NaN	1	1	1	12.1	12.1	12.1	24.289	140.88	10116000	5813700	4301800	NaN	NaN	NaN	NaN	NaN	NaN	NaN	NaN	NaN	NaN	0.11974	NaN	NaN	0.121938	NaN	-0.0843815	0.201916	NaN	0.0525187	-0.26786
AT2G02100	Q39182	PDF2.2	Defensin-like protein 2 (Low-molecular-weight cysteine-rich protein 69) (Protein LCR69) (Plant defensin 2.2)	0.0132418	NaN	NaN	NaN	0.95662	NaN	NaN	NaN	1	1	1	31.2	31.2	31.2	8.524	116.7	25455000	14792000	10663000	0.199547	NaN	NaN	NaN	NaN	NaN	0.272755	NaN	NaN	0.126508	0.307424	NaN	NaN	NaN	NaN	0.494844	-0.224157	-0.160967	-0.389813	0.346302
AT1G11930	O65386;Q944L8	F12F1.20;At1g11930	Pyridoxal phosphate homeostasis protein (PLP homeostasis protein)	-0.010334	NaN	NaN	NaN	0.970402	NaN	NaN	NaN	1	1	1	5.1	5.1	5.1	27.766	3.1623	2193500	1406000	787460	NaN	NaN	NaN	NaN	NaN	NaN	NaN	NaN	NaN	NaN	NaN	NaN	NaN	NaN	NaN	NaN	NaN	-0.377827	0.241365	0.10546
AT1G75270	Q9FRL8	DHAR2	Glutathione S-transferase DHAR2 (EC 2.5.1.18) (Chloride intracellular channel homolog 2) (CLIC homolog 2) (Glutathione-dependent dehydroascorbate reductase 2) (AtDHAR2) (CytDHAR) (GSH-dependent dehydroascorbate reductase 2) (EC 1.8.5.1)	0.0009067	NaN	NaN	NaN	0.992826	NaN	NaN	NaN	1	1	1	6.6	6.6	6.6	23.407	4.8496	5812200	3331400	2480900	NaN	NaN	NaN	NaN	NaN	NaN	NaN	NaN	NaN	NaN	NaN	NaN	NaN	NaN	NaN	NaN	-0.054999	-0.0520495	0.0980237	0.0126516
AT5G10010	A2RVJ8	At5g10010	Protein HEAT INTOLERANT 4	NaN	NaN	NaN	NaN	NaN	NaN	NaN	NaN	1	1	1	3.9	3.9	3.9	50.516	2.9353	170630	113160	57478	NaN	NaN	NaN	NaN	NaN	NaN	NaN	NaN	NaN	NaN	NaN	NaN	NaN	NaN	NaN	NaN	NaN	NaN	NaN	NaN
AT3G16290	A8MPR5	EMB2083	Probable inactive ATP-dependent zinc metalloprotease FTSHI 2, chloroplastic (AtFTSHI2) (Protein EMBRYO DEFECTIVE 2083) (Protein FTSH INACTIVE PROTEASE 2)	NaN	NaN	NaN	NaN	NaN	NaN	NaN	NaN	1	1	1	1.9	1.9	1.9	99.863	8.3724	1911700	1061600	850070	NaN	NaN	NaN	NaN	NaN	NaN	NaN	NaN	NaN	NaN	NaN	NaN	NaN	NaN	NaN	NaN	NaN	NaN	0.0449584	NaN
AT3G09350	A8MQ87;Q84J81	Fes1A	Fes1A	NaN	NaN	NaN	NaN	NaN	NaN	NaN	NaN	1	1	1	2.1	2.1	2.1	36.184	15.306	72181000	37381000	34799000	NaN	NaN	NaN	NaN	NaN	NaN	NaN	NaN	NaN	NaN	0.0686644	NaN	NaN	NaN	0.127617	NaN	NaN	NaN	NaN	0.210517
AT1G73650	A8MQG9;B3H655;B9DFE9;F4HRY1	At1g73650	3-oxo-5-alpha-steroid 4-dehydrogenase (DUF1295);3-oxo-5-alpha-steroid 4-dehydrogenase (DUF1295) (AT1G73650 protein)	NaN	NaN	NaN	NaN	NaN	NaN	NaN	NaN	1	1	1	5.8	5.8	5.8	23.73	4.1439	2447000	1254400	1192600	NaN	NaN	NaN	NaN	NaN	NaN	NaN	0.562439	NaN	NaN	NaN	NaN	NaN	NaN	NaN	NaN	NaN	NaN	NaN	-0.206706
AT1G27385	A8MQS1;Q9FZJ7;F4HSW1;F4HSW0	At1g27385	At1g27385 (F17L21.17) (Phosphoribosylformylglycinamidine synthase);Phosphoribosylformylglycinamidine synthase	NaN	NaN	NaN	NaN	NaN	NaN	NaN	NaN	1	1	1	12.9	12.9	12.9	21.928	3.4732	847880	446100	401780	NaN	NaN	NaN	NaN	NaN	NaN	NaN	NaN	NaN	NaN	NaN	NaN	NaN	NaN	NaN	NaN	NaN	NaN	NaN	NaN
AT2G24390	F4IPN3;F4IPN4;A8MRP2	At2g24390	AIG2-like (Avirulence induced gene) family protein;AIG2-like protein D (EC 2.3.2.-) (Avirulence-induced gene 2-like protein D) (Putative gamma-glutamylcyclotransferase)	NaN	NaN	NaN	NaN	NaN	NaN	NaN	NaN	1	1	1	15.5	15.5	15.5	17.057	3.5569	107300	56988	50314	NaN	NaN	NaN	NaN	NaN	NaN	NaN	NaN	NaN	NaN	NaN	NaN	NaN	NaN	NaN	NaN	NaN	NaN	NaN	NaN
AT1G65440	F4I9Y9;F4I9Y7;A8MS85	GTB1	Transcription elongation factor spt6;Transcription elongation factor SPT6 homolog (AtSPT6)	NaN	NaN	NaN	NaN	NaN	NaN	NaN	NaN	1	1	1	1.1	1.1	1.1	166.39	3.0286	197570	117340	80221	NaN	NaN	NaN	NaN	NaN	NaN	NaN	NaN	NaN	NaN	NaN	NaN	NaN	NaN	NaN	NaN	NaN	NaN	NaN	NaN
AT3G21630	A8R7E6	CERK1	Chitin elicitor receptor kinase 1 (AtCERK1) (EC 2.7.11.1) (LysM domain receptor-like kinase 1) (LysM RLK1) (LysM-containing receptor-like kinase 1)	NaN	NaN	NaN	NaN	NaN	NaN	NaN	NaN	1	1	1	3.4	3.4	3.4	67.314	2.6782	144280	112670	31616	NaN	NaN	NaN	NaN	NaN	NaN	NaN	NaN	NaN	NaN	NaN	NaN	NaN	NaN	NaN	NaN	NaN	NaN	NaN	NaN
AT1G01910	B3H5S5;Q949M9	At1g01910	ATPase (EC 3.6.-.-) (Arsenical pump-driving ATPase) (Arsenite-stimulated ATPase)	NaN	NaN	NaN	NaN	NaN	NaN	NaN	NaN	1	1	1	6.3	6.3	6.3	33.91	3.4473	1156100	995610	160500	NaN	NaN	NaN	NaN	NaN	NaN	NaN	NaN	NaN	NaN	NaN	NaN	NaN	NaN	NaN	NaN	NaN	NaN	NaN	NaN
AT5G09900	F4KFD7;B3H6B0;Q9FIB6	EMB2107;RPN5A	26S proteasome regulatory subunit, putative (RPN5);26S proteasome non-ATPase regulatory subunit 12 homolog A (26S proteasome regulatory subunit RPN5a) (AtRPN5a) (26S proteasome regulatory subunit p55 homolog A) (Protein EMBRYO DEFECTIVE 2107) (Protein MARIPOSA)	NaN	NaN	NaN	NaN	NaN	NaN	NaN	NaN	1	1	1	6.3	6.3	6.3	50.85	18.625	1205500	905620	299830	NaN	NaN	NaN	NaN	NaN	NaN	NaN	NaN	NaN	NaN	NaN	NaN	NaN	NaN	NaN	NaN	-0.274822	NaN	NaN	NaN
AT4G05420	B3H6I9;Q9M0V3	DDB1A	Damaged DNA binding protein 1A;DNA damage-binding protein 1a (UV-damaged DNA-binding protein 1a) (DDB1a)	NaN	NaN	NaN	NaN	NaN	NaN	NaN	NaN	1	1	1	1.5	1.5	1.5	118.95	8.7178	1647600	936420	711140	NaN	NaN	NaN	NaN	NaN	NaN	NaN	NaN	NaN	NaN	NaN	NaN	NaN	NaN	NaN	NaN	-0.313505	NaN	0.11933	NaN
AT3G45050	Q8GWW5;B9DG54	At3g45050	At3g45050 (Transmembrane protein);AT3G45050 protein (Transmembrane protein)	NaN	NaN	NaN	NaN	NaN	NaN	NaN	NaN	1	1	1	11.5	11.5	11.5	13.751	23.994	1447200	844430	602730	NaN	NaN	NaN	NaN	NaN	NaN	NaN	NaN	NaN	NaN	NaN	NaN	NaN	NaN	NaN	NaN	NaN	NaN	0.306185	0.355498
AT1G22650;AT1G35580;AT4G09510;AT4G34860	F4HZY9;Q67XD9-2;F4I2X9;Q9LQF2;Q67XD9;Q9SW48	CINV1;CINV2;INVD;INVB	Alkaline/neutral invertase CINV1 (EC 3.2.1.26) (Alkaline/neutral invertase G) (A/N-INVG) (Cytosolic invertase 1) (AtCYT-INV1);Alkaline/neutral invertase CINV2 (EC 3.2.1.26) (Alkaline/neutral invertase I) (A/N-INVI) (Cytosolic invertase 2);Cytosolic invertase 1;Probable alkaline/neutral invertase B (A/N-INVB) (EC 3.2.1.26);Probable alkaline/neutral invertase D (A/N-INVD) (EC 3.2.1.26)	NaN	NaN	NaN	NaN	NaN	NaN	NaN	NaN	1	1	1	4.1	4.1	4.1	52.215	2.6877	1085300	761630	323670	NaN	NaN	NaN	NaN	NaN	NaN	NaN	NaN	NaN	NaN	NaN	NaN	NaN	-1.27647	NaN	-0.246792	NaN	NaN	NaN	NaN
AT1G22280	F4I1B4;Q9LME4	PAPP2C	Phytochrome-associated protein phosphatase type 2C;Probable protein phosphatase 2C 9 (AtPP2C09) (EC 3.1.3.16) (Phytochrome-associated protein phosphatase 2C) (PAPP2C)	NaN	NaN	NaN	NaN	NaN	NaN	NaN	NaN	1	1	1	4.5	4.5	4.5	31.434	7.7764	3462100	2235500	1226700	NaN	NaN	NaN	NaN	NaN	NaN	NaN	NaN	NaN	NaN	NaN	NaN	-0.033198	NaN	0.0370466	NaN	NaN	NaN	NaN	NaN
AT1G76140	F4I2A1;F4I2A0	At1g76140	Prolyl oligopeptidase family protein	NaN	NaN	NaN	NaN	NaN	NaN	NaN	NaN	1	1	1	2.7	2.7	2.7	89.062	3.3727	2969800	1521300	1448500	NaN	NaN	NaN	NaN	NaN	NaN	NaN	NaN	NaN	NaN	0.140162	NaN	NaN	NaN	NaN	NaN	NaN	NaN	NaN	NaN
AT1G63680	F4I3P9	MURE	UDP-N-acetylmuramoyl-L-alanyl-D-glutamate--2,6-diaminopimelate ligase MurE homolog, chloroplastic (AtMurE) (Protein ALBINO OR PALE-GREEN 13) (Protein PIGMENT DEFECTIVE EMBRYO 316)	NaN	NaN	NaN	NaN	NaN	NaN	NaN	NaN	1	1	1	2.8	2.8	2.8	85.586	2.6916	423880	254930	168940	NaN	NaN	NaN	NaN	NaN	NaN	NaN	NaN	NaN	NaN	NaN	NaN	NaN	NaN	NaN	NaN	NaN	NaN	NaN	NaN
AT1G04130	F4I456	At1g04130	Tetratricopeptide repeat (TPR)-like superfamily protein	NaN	NaN	NaN	NaN	NaN	NaN	NaN	NaN	1	1	1	4.2	4.2	4.2	40.51	2.7857	119310	93959	25354	NaN	NaN	NaN	NaN	NaN	NaN	NaN	NaN	NaN	NaN	NaN	NaN	NaN	NaN	NaN	NaN	NaN	NaN	NaN	NaN
AT1G16820	F4I601;F4I600	At1g16820	Vacuolar ATP synthase catalytic subunit-related / V-ATPase-related / vacuolar proton pump-like protein	NaN	NaN	NaN	NaN	NaN	NaN	NaN	NaN	1	1	1	22.7	22.7	22.7	7.3872	11.442	16199000	10825000	5373700	NaN	NaN	NaN	NaN	NaN	NaN	NaN	NaN	NaN	NaN	NaN	0.106815	NaN	NaN	NaN	NaN	NaN	1.25046	NaN	-0.554714
AT1G12470	F4IDS7	At1g12470	Vacuolar sorting protein 18	NaN	NaN	NaN	NaN	NaN	NaN	NaN	NaN	1	1	1	1.3	1.3	1.3	112.32	2.6879	304480	197270	107210	NaN	NaN	NaN	NaN	NaN	NaN	NaN	NaN	NaN	NaN	NaN	NaN	NaN	-0.242455	NaN	NaN	NaN	NaN	NaN	NaN
AT2G48070	Q9ZU82;F4IN59	RPH1	Expressed protein (Resistance to phytophthora 1);Resistance to phytophthora 1	NaN	NaN	NaN	NaN	NaN	NaN	NaN	NaN	1	1	1	8.6	8.6	8.6	22.093	36.222	2094200	1146600	947560	NaN	NaN	NaN	NaN	NaN	NaN	NaN	NaN	NaN	NaN	NaN	NaN	NaN	NaN	NaN	NaN	-0.384767	-0.325773	NaN	NaN
AT3G09090	F4IYM4-2;F4IYM4-3;F4IYM4	DEX1	Protein DEFECTIVE IN EXINE FORMATION 1	NaN	NaN	NaN	NaN	NaN	NaN	NaN	NaN	1	1	1	2	2	2	90.461	2.9329	252200	161870	90335	NaN	NaN	NaN	NaN	NaN	NaN	NaN	NaN	NaN	NaN	NaN	NaN	NaN	NaN	NaN	NaN	NaN	NaN	NaN	NaN
AT3G43540	F4IZ56;Q9M236	At3g43540;T18D12_110	Initiation factor 4F subunit (DUF1350)	NaN	NaN	NaN	NaN	NaN	NaN	NaN	NaN	1	1	1	9	9	9	33.35	28.684	854590	572500	282100	NaN	NaN	NaN	NaN	NaN	NaN	NaN	NaN	NaN	NaN	NaN	NaN	NaN	NaN	NaN	NaN	NaN	NaN	-0.0569086	NaN
AT3G01780	F4J8D3	TPLATE	Protein TPLATE	NaN	NaN	NaN	NaN	NaN	NaN	NaN	NaN	1	1	1	2.4	2.4	2.4	130.91	17.976	199140	152700	46444	NaN	NaN	NaN	NaN	NaN	NaN	NaN	NaN	NaN	NaN	NaN	NaN	NaN	NaN	NaN	NaN	NaN	NaN	NaN	NaN
AT3G53180	F4J9A0	At3g53180	Nodulin/glutamine synthase-like protein	NaN	NaN	NaN	NaN	NaN	NaN	NaN	NaN	1	1	1	2.5	2.5	2.5	94.384	3.0767	334320	275130	59184	NaN	NaN	NaN	NaN	NaN	NaN	NaN	NaN	NaN	NaN	NaN	NaN	NaN	-0.65504	NaN	NaN	NaN	NaN	NaN	NaN
AT3G05910	F4J9L0;Q9SFF6	At3g05910;PAE12	Pectin acetylesterase (EC 3.1.1.-);Pectin acetylesterase 12 (EC 3.1.1.-)	NaN	NaN	NaN	NaN	NaN	NaN	NaN	NaN	1	1	1	5.8	5.8	5.8	34.391	3.025	262850	208030	54814	NaN	NaN	NaN	NaN	NaN	NaN	NaN	NaN	NaN	NaN	NaN	NaN	NaN	NaN	NaN	NaN	NaN	NaN	NaN	NaN
AT3G18860	Q9LHN3;F4J9W8	At3g18860	AT3g18860/MCB22_3 (Transducin family protein / WD-40 repeat family protein);Transducin family protein / WD-40 repeat family protein	NaN	NaN	NaN	NaN	NaN	NaN	NaN	NaN	1	1	1	2	2	2	84.273	19.594	437970	267430	170540	NaN	NaN	NaN	NaN	NaN	NaN	NaN	NaN	NaN	NaN	NaN	NaN	NaN	NaN	NaN	NaN	NaN	NaN	0.118589	NaN
AT3G18900	F4J9X5;F4J9X4	At3g18900	Ternary complex factor MIP1 leucine-zipper protein	NaN	NaN	NaN	NaN	NaN	NaN	NaN	NaN	1	1	1	2.9	2.9	2.9	59.877	2.813	2474000	1507400	966520	NaN	NaN	NaN	NaN	NaN	NaN	NaN	NaN	NaN	NaN	NaN	NaN	NaN	NaN	NaN	NaN	NaN	NaN	NaN	NaN
AT3G13790	F4JEJ0;Q43866	ATBFRUCT1;CWINV1	Beta-fructofuranosidase, insoluble isoenzyme CWINV1 (EC 3.2.1.26) (Cell wall beta-fructosidase 1) (AtbetaFRUCT1) (Cell wall invertase 1) (AtcwINV1) (Sucrose hydrolase 1);Glycosyl hydrolases family 32 protein	NaN	NaN	NaN	NaN	NaN	NaN	NaN	NaN	1	1	1	1.9	1.9	1.9	65.953	3.9692	1266600	751920	514700	NaN	NaN	NaN	NaN	NaN	NaN	NaN	NaN	NaN	NaN	NaN	NaN	NaN	NaN	NaN	NaN	NaN	NaN	-0.565423	-0.0122012
AT4G01070	F4JHS0;Q9M156	GT72B1;UGT72B1	UDP-glycosyltransferase 72B1 (EC 2.4.1.-) (Arbutin synthase) (Probable hydroquinone glucosyltransferase) (EC 2.4.1.218);UDP-Glycosyltransferase superfamily protein	NaN	NaN	NaN	NaN	NaN	NaN	NaN	NaN	1	1	1	8	8	8	38.684	5.3277	359070	178550	180520	NaN	NaN	NaN	NaN	NaN	NaN	NaN	NaN	NaN	NaN	NaN	NaN	NaN	NaN	NaN	NaN	NaN	NaN	NaN	NaN
AT3G07590;AT4G02840	Q9SSF1;Q9SY09;F4JHV8	MLP3.4;T5J8.16;At4g02840	Small nuclear ribonucleoprotein SmD1a (AtSmD1-a);Small nuclear ribonucleoprotein SmD1b (AtSmD1-b)	NaN	NaN	NaN	NaN	NaN	NaN	NaN	NaN	1	1	1	17.5	17.5	17.5	12.6	2.9755	3361200	1837100	1524100	NaN	NaN	NaN	NaN	NaN	NaN	NaN	NaN	NaN	NaN	NaN	NaN	NaN	NaN	NaN	NaN	NaN	0.340257	NaN	NaN
AT4G27690;AT5G53530	F4JJR0;Q9FJD0;Q9T091	VPS26B;VPS26A	Vacuolar protein sorting 26B;Vacuolar protein sorting-associated protein 26A (Vesicle protein sorting 26A);Vacuolar protein sorting-associated protein 26B (Vesicle protein sorting 26B)	NaN	NaN	NaN	NaN	NaN	NaN	NaN	NaN	1	1	1	6.5	6.5	6.5	32.108	5.6651	1090000	569530	520470	NaN	NaN	NaN	NaN	NaN	NaN	NaN	NaN	NaN	NaN	NaN	NaN	NaN	NaN	NaN	NaN	NaN	NaN	NaN	NaN
AT4G35790	F4JNU6;Q9C5Y0-2;Q9C5Y0	PLDDELTA	Phospholipase D (EC 3.1.4.4);Phospholipase D delta (AtPLDdelta) (PLD delta) (EC 3.1.4.4)	NaN	NaN	NaN	NaN	NaN	NaN	NaN	NaN	1	1	1	2.7	2.7	2.7	79.229	2.7463	382600	213070	169530	NaN	NaN	NaN	NaN	NaN	NaN	NaN	NaN	NaN	NaN	NaN	NaN	NaN	NaN	0.323424	NaN	NaN	NaN	NaN	NaN
AT4G36690	F4JQG2;O23212-2;O23212-3;O23212	ATU2AF65A;U2AF65A	Splicing factor U2af large subunit A (U2 auxiliary factor 65 kDa subunit A) (U2 small nuclear ribonucleoprotein auxiliary factor large subunit A) (U2 snRNP auxiliary factor large subunit A);U2 snRNP auxiliary factor large subunit	NaN	NaN	NaN	NaN	NaN	NaN	NaN	NaN	1	1	1	7.6	7.6	7.6	60.665	3.2648	293270	180940	112330	NaN	NaN	NaN	NaN	NaN	NaN	NaN	NaN	NaN	NaN	NaN	NaN	NaN	NaN	NaN	NaN	NaN	NaN	NaN	NaN
AT4G36945	F4JQJ7	At4g36945	PLC-like phosphodiesterases superfamily protein	NaN	NaN	NaN	NaN	NaN	NaN	NaN	NaN	1	1	1	3.9	3.9	3.9	44.331	35.337	223100	122270	100820	NaN	NaN	NaN	NaN	NaN	NaN	NaN	NaN	NaN	NaN	NaN	NaN	NaN	0.201441	NaN	NaN	NaN	NaN	NaN	NaN
AT4G12650	F4JRE0	TMN12	Transmembrane 9 superfamily member 12 (Endomembrane protein 7) (Transmembrane nine protein 12) (AtTMN12)	NaN	NaN	NaN	NaN	NaN	NaN	NaN	NaN	1	1	1	4.3	4.3	4.3	74.139	8.1302	1198300	949290	249050	NaN	NaN	NaN	NaN	NaN	NaN	NaN	NaN	NaN	NaN	NaN	NaN	NaN	NaN	NaN	NaN	0.013566	NaN	-0.675431	NaN
AT4G18970	F4JSC9;Q93YW8	At4g18970	GDSL esterase/lipase At4g18970 (EC 3.1.1.-) (Extracellular lipase At4g18970);GDSL-like Lipase/Acylhydrolase superfamily protein	NaN	NaN	NaN	NaN	NaN	NaN	NaN	NaN	1	1	1	5.4	5.4	5.4	45.267	5.295	1853900	1107600	746280	NaN	NaN	NaN	NaN	NaN	NaN	NaN	NaN	NaN	NaN	NaN	NaN	NaN	NaN	NaN	NaN	-0.273112	NaN	NaN	NaN
AT5G12370	F4K0X7;Q8RVQ5	SEC10	Exocyst complex component sec10	NaN	NaN	NaN	NaN	NaN	NaN	NaN	NaN	1	1	1	1.8	1.8	1.8	89.036	24.357	492230	277460	214780	NaN	NaN	NaN	NaN	NaN	NaN	NaN	NaN	NaN	NaN	NaN	NaN	NaN	0.0183515	NaN	NaN	NaN	NaN	NaN	NaN
AT5G05980	F4K2A1-2		Folylpolyglutamate synthase (EC 6.3.2.17) (DHFS-FPGS homolog B) (Folylpoly-gamma-glutamate synthetase) (FPGS) (Tetrahydrofolylpolyglutamate synthase) (Tetrahydrofolate synthase)	NaN	NaN	NaN	NaN	NaN	NaN	NaN	NaN	1	1	1	4.1	4.1	4.1	56.637	63.871	1228600	1228600	0	NaN	NaN	NaN	NaN	NaN	NaN	NaN	NaN	NaN	NaN	NaN	NaN	NaN	NaN	NaN	NaN	NaN	NaN	NaN	NaN
AT5G19750	F4K2L8	At5g19750	Peroxisomal membrane 22 kDa (Mpv17/PMP22) family protein	NaN	NaN	NaN	NaN	NaN	NaN	NaN	NaN	1	1	1	6.6	6.6	6.6	30.369	6.9309	634090	194350	439740	NaN	NaN	NaN	NaN	NaN	NaN	NaN	1.48277	NaN	NaN	NaN	NaN	NaN	NaN	NaN	NaN	NaN	NaN	NaN	NaN
AT5G58060	F4KDI1;Q9ZRD6	YKT61	SNARE-like superfamily protein;VAMP-like protein YKT61 (AtYKT61) (Geranylgeranylated protein 1) (AtGP1)	NaN	NaN	NaN	NaN	NaN	NaN	NaN	NaN	1	1	1	6.8	6.8	6.8	24.905	4.5263	2045100	1143400	901690	NaN	NaN	NaN	NaN	NaN	NaN	NaN	NaN	NaN	NaN	NaN	NaN	NaN	0.0308348	NaN	NaN	-0.259053	NaN	NaN	NaN
AT5G03920	F4KI28	At5g03920	F-box protein	NaN	NaN	NaN	NaN	NaN	NaN	NaN	NaN	1	1	1	9.8	9.8	9.8	20.085	2.8742	25875000	13621000	12254000	NaN	-0.193023	NaN	NaN	NaN	NaN	NaN	NaN	0.278071	-0.0168995	NaN	NaN	NaN	NaN	NaN	NaN	NaN	NaN	NaN	NaN
AT1G10960	O04090	FD1	Ferredoxin-1, chloroplastic (AtFd1)	NaN	NaN	NaN	NaN	NaN	NaN	NaN	NaN	1	1	1	23	23	23	15.897	196.87	75275000	38357000	36918000	NaN	NaN	-0.928001	NaN	NaN	NaN	-0.30926	NaN	NaN	NaN	0.909565	NaN	NaN	NaN	NaN	NaN	NaN	NaN	-0.063538	0.69634
AT1G02840	O22315-2;O22315-3;O22315	SR34	Serine/arginine-rich-splicing factor SR34 (At-SR34) (At-SRp34) (AtSR34) (Pre-mRNA-splicing factor SF2) (SR1 protein)	NaN	NaN	NaN	NaN	NaN	NaN	NaN	NaN	1	1	1	4.4	4.4	4.4	30.508	2.537	3646400	1957600	1688800	NaN	NaN	NaN	NaN	NaN	NaN	NaN	NaN	NaN	NaN	NaN	NaN	NaN	NaN	NaN	NaN	NaN	NaN	0.392418	NaN
AT2G33330	O22784	CRRSP11	Cysteine-rich repeat secretory protein 11 (Plasmodesmata-located protein 3) (PDLP3)	NaN	NaN	NaN	NaN	NaN	NaN	NaN	NaN	1	1	1	4.6	4.6	4.6	32.658	4.863	0	0	0	NaN	NaN	NaN	NaN	NaN	NaN	NaN	NaN	NaN	NaN	NaN	NaN	NaN	NaN	NaN	NaN	NaN	NaN	NaN	NaN
AT2G33380	O22788-2;O22788	PXG3	Probable peroxygenase 3 (AtPXG3) (EC 1.11.2.3) (Caleosin-3) (Protein RESPONSIVE TO DESICCATION 20)	NaN	NaN	NaN	NaN	NaN	NaN	NaN	NaN	1	1	1	10.3	10.3	10.3	21.697	5.6506	0	0	0	NaN	NaN	NaN	NaN	NaN	NaN	NaN	NaN	NaN	NaN	NaN	NaN	NaN	NaN	NaN	NaN	NaN	NaN	NaN	NaN
AT2G41790	O22941	PXM16	Insulin-degrading enzyme-like 1, peroxisomal (EC 3.4.24.-) (Insulysin-like 1) (Peroxisomal M16 protease) (Zinc-metallopeptidase)	NaN	NaN	NaN	NaN	NaN	NaN	NaN	NaN	1	1	1	1.2	1.2	1.2	110.99	3.1809	921300	568320	352980	NaN	NaN	NaN	NaN	NaN	NaN	NaN	NaN	NaN	NaN	NaN	NaN	NaN	NaN	0.0223901	NaN	NaN	NaN	NaN	NaN
AT4G14430	O23299	ECI2	Enoyl-CoA delta isomerase 2, peroxisomal (EC 5.3.3.8) (Delta(3),Delta(2)-enoyl CoA isomerase 2) (AtECI2) (Indole-3-butyric acid response 10)	NaN	NaN	NaN	NaN	NaN	NaN	NaN	NaN	1	1	1	7.1	7.1	7.1	25.773	5.136	1150600	527160	623470	NaN	NaN	NaN	NaN	NaN	NaN	NaN	NaN	NaN	NaN	NaN	0.0833861	NaN	NaN	NaN	NaN	NaN	-0.212794	NaN	NaN
AT4G14490	O23305		FHA domain-containing protein At4g14490	NaN	NaN	NaN	NaN	NaN	NaN	NaN	NaN	1	1	1	4.4	4.4	4.4	43.367	2.6959	19446000	9719800	9726100	NaN	NaN	NaN	NaN	NaN	0.190913	NaN	0.157786	NaN	NaN	NaN	NaN	NaN	NaN	NaN	NaN	NaN	NaN	NaN	NaN
AT4G14540	O23310	NFYB3	Nuclear transcription factor Y subunit B-3 (AtNF-YB-3) (Transcriptional activator HAP3C)	NaN	NaN	NaN	NaN	NaN	NaN	NaN	NaN	1	1	1	13	13	13	17.186	8.0546	463720	267540	196180	NaN	NaN	NaN	NaN	NaN	NaN	NaN	NaN	NaN	NaN	NaN	NaN	NaN	NaN	NaN	NaN	NaN	NaN	0.337236	NaN
AT2G32730	O48844	RPN2A	26S proteasome non-ATPase regulatory subunit 1 homolog A (26S proteasome regulatory subunit RPN2a) (AtRPN2a) (26S proteasome regulatory subunit S1 homolog A)	NaN	NaN	NaN	NaN	NaN	NaN	NaN	NaN	1	1	1	1.5	1.5	1.5	108.98	4.6411	68403	41189	27214	NaN	NaN	NaN	NaN	NaN	NaN	NaN	NaN	NaN	NaN	NaN	NaN	NaN	NaN	NaN	NaN	NaN	NaN	NaN	NaN
AT1G20050	O48962		Probable 3-beta-hydroxysteroid-Delta(8),Delta(7)-isomerase (EC 5.3.3.5) (Cholestenol Delta-isomerase) (Delta(8)-Delta(7) sterol isomerase) (D8-D7 sterol isomerase)	NaN	NaN	NaN	NaN	NaN	NaN	NaN	NaN	1	1	1	4.9	4.9	4.9	25.146	8.5336	254970	162690	92273	NaN	NaN	NaN	NaN	NaN	NaN	NaN	NaN	NaN	NaN	NaN	NaN	NaN	NaN	NaN	NaN	NaN	NaN	NaN	NaN
AT5G24770;AT5G24780	O82122;O49195	VSP2;VSP1	Vegetative storage protein 1;Vegetative storage protein 2	NaN	NaN	NaN	NaN	NaN	NaN	NaN	NaN	1	1	1	8.3	8.3	8.3	29.842	2.8824	590750	323530	267220	NaN	NaN	NaN	NaN	NaN	NaN	NaN	NaN	NaN	1.16221	NaN	NaN	NaN	NaN	NaN	NaN	NaN	NaN	NaN	NaN
AT2G34740	O64583-2;O64583		Probable protein phosphatase 2C 28 (AtPP2C28) (EC 3.1.3.16)	NaN	NaN	NaN	NaN	NaN	NaN	NaN	NaN	1	1	1	4.5	4.5	4.5	34.632	9.1206	5075600	3079900	1995700	NaN	NaN	NaN	NaN	NaN	NaN	NaN	NaN	NaN	NaN	-0.722634	NaN	NaN	NaN	NaN	NaN	-0.510084	NaN	NaN	-0.510758
AT2G34620	O64685	At2g34620	Mitochondrial transcription termination factor family protein	NaN	NaN	NaN	NaN	NaN	NaN	NaN	NaN	1	1	1	7.9	7.9	7.9	34.253	8.83	504290	363850	140440	NaN	NaN	NaN	NaN	NaN	NaN	NaN	NaN	NaN	NaN	NaN	NaN	NaN	NaN	NaN	NaN	NaN	NaN	-0.12435	NaN
AT2G44310	O64866	At2g44310	Calcium-binding EF-hand family protein (Expressed protein)	NaN	NaN	NaN	NaN	NaN	NaN	NaN	NaN	1	1	1	19	19	19	15.821	8.6331	311340	168440	142900	NaN	NaN	NaN	NaN	NaN	NaN	NaN	NaN	NaN	NaN	NaN	NaN	NaN	NaN	NaN	NaN	NaN	NaN	NaN	NaN
AT4G00490	O65258	BAM2	Beta-amylase 2, chloroplastic (EC 3.2.1.2) (1,4-alpha-D-glucan maltohydrolase) (Beta-amylase 9)	NaN	NaN	NaN	NaN	NaN	NaN	NaN	NaN	1	1	1	3.1	3.1	3.1	61.397	46.868	2155200	1069000	1086200	NaN	NaN	NaN	NaN	NaN	NaN	NaN	NaN	NaN	NaN	-0.0304175	NaN	0.0726201	NaN	NaN	NaN	NaN	NaN	NaN	NaN
AT4G31500	O65782	CYP83B1	Cytochrome P450 83B1 (EC 1.14.14.45) (Protein ALTERED TRYPTOPHAN REGULATION 4) (Protein RED ELONGATED 1) (Protein SUPERROOT 2)	NaN	NaN	NaN	NaN	NaN	NaN	NaN	NaN	1	1	1	2.2	2.2	2.2	56.846	9.0163	2286100	1444400	841770	-0.441455	NaN	NaN	NaN	-0.407803	NaN	NaN	NaN	NaN	NaN	NaN	NaN	NaN	-0.199097	-0.321612	NaN	NaN	NaN	NaN	0.0713757
AT2G38140	O80439	RPS31	30S ribosomal protein S31, chloroplastic (Plastid-specific 30S ribosomal protein 4) (PSRP-4)	NaN	NaN	NaN	NaN	NaN	NaN	NaN	NaN	1	1	1	8.5	8.5	8.5	12.783	5.3365	2439600	1051700	1387900	NaN	NaN	NaN	NaN	NaN	NaN	NaN	NaN	NaN	NaN	NaN	NaN	NaN	NaN	NaN	NaN	NaN	NaN	1.0154	NaN
AT1G65450	Q8LDZ6;O80816	At1g65450;T8F5.23	HXXXD-type acyl-transferase family protein (Similar to gb|Z84386 anthranilate N-hydroxycinnamoyl/benzoyltransferase from Dianthus caryophyllus);HXXXD-type acyl-transferase family protein (T8F5.23 protein)	NaN	NaN	NaN	NaN	NaN	NaN	NaN	NaN	1	1	1	3.8	3.8	3.8	32.256	2.6685	21168000	21054000	114590	NaN	NaN	NaN	NaN	NaN	NaN	NaN	NaN	NaN	NaN	NaN	NaN	-1.28128	NaN	NaN	NaN	NaN	NaN	NaN	NaN
AT4G02370	O81296	T14P8.18	AT4g02370 protein (T14P8.18)	NaN	NaN	NaN	NaN	NaN	NaN	NaN	NaN	1	1	1	7.8	7.8	7.8	18.356	3.2099	1355100	668170	686950	NaN	NaN	NaN	NaN	NaN	NaN	NaN	NaN	NaN	NaN	NaN	NaN	NaN	NaN	NaN	NaN	NaN	NaN	0.812439	NaN
AT4G24920;AT5G50460	P0DI75;P0DI74	SEC61G2;SEC61G1	Protein transport protein Sec61 subunit gamma-1;Protein transport protein Sec61 subunit gamma-2	NaN	NaN	NaN	NaN	NaN	NaN	NaN	NaN	1	1	1	17.4	17.4	17.4	7.7372	3.7317	247350	110150	137200	NaN	NaN	NaN	NaN	NaN	NaN	NaN	NaN	NaN	NaN	NaN	NaN	NaN	NaN	NaN	NaN	NaN	NaN	NaN	NaN
AT2G07050	P38605	CAS1	Cycloartenol synthase (AtCYC) (EC 5.4.99.8) (2,3-epoxysqualene--cycloartenol cyclase)	NaN	NaN	NaN	NaN	NaN	NaN	NaN	NaN	1	1	1	2.6	2.6	2.6	86.032	3.6544	588430	408050	180380	NaN	NaN	NaN	NaN	NaN	NaN	NaN	NaN	NaN	NaN	NaN	NaN	NaN	NaN	NaN	NaN	NaN	NaN	0.0101354	NaN
AT1G62640	P49243		3-oxoacyl-[acyl-carrier-protein] synthase III, chloroplastic (EC 2.3.1.180) (Beta-ketoacyl-ACP synthase III) (KAS III)	NaN	NaN	NaN	NaN	NaN	NaN	NaN	NaN	1	1	1	3.2	3.2	3.2	42.846	6.665	2162000	855300	1306800	NaN	NaN	NaN	NaN	NaN	NaN	NaN	NaN	NaN	NaN	NaN	NaN	NaN	NaN	NaN	NaN	-0.851572	NaN	NaN	NaN
ATCG00360	P61843	ycf3	Photosystem I assembly protein Ycf3	NaN	NaN	NaN	NaN	NaN	NaN	NaN	NaN	1	1	1	12.5	12.5	12.5	19.536	14.017	1778900	923660	855240	NaN	NaN	NaN	NaN	NaN	NaN	NaN	NaN	NaN	NaN	NaN	NaN	NaN	NaN	NaN	NaN	NaN	NaN	NaN	NaN
	P92558	ND1	NADH-ubiquinone oxidoreductase chain 1 (EC 1.6.5.3) (NADH dehydrogenase subunit 1)	NaN	NaN	NaN	NaN	NaN	NaN	NaN	NaN	1	1	1	5.8	5.8	5.8	36.03	4.3418	516680	303910	212770	NaN	NaN	NaN	NaN	NaN	NaN	NaN	NaN	NaN	NaN	NaN	NaN	NaN	NaN	NaN	NaN	NaN	NaN	NaN	NaN
AT1G06570	P93836	HPD	4-hydroxyphenylpyruvate dioxygenase (EC 1.13.11.27) (4-hydroxyphenylpyruvic acid oxidase) (4HPPD) (HPD) (HPPDase)	NaN	NaN	NaN	NaN	NaN	NaN	NaN	NaN	1	1	1	5.4	5.4	5.4	48.815	2.8808	177120	87582	89533	NaN	NaN	NaN	NaN	NaN	NaN	NaN	NaN	NaN	NaN	NaN	NaN	NaN	NaN	NaN	NaN	NaN	NaN	NaN	NaN
AT1G09560	P94014	GLP4	Germin-like protein subfamily 2 member 1	NaN	NaN	NaN	NaN	NaN	NaN	NaN	NaN	1	1	1	7.8	7.8	7.8	22.868	6.6025	1001800	511680	490090	NaN	NaN	NaN	NaN	NaN	NaN	NaN	NaN	NaN	NaN	NaN	NaN	NaN	-0.0578416	NaN	NaN	NaN	NaN	NaN	NaN
AT3G60370	Q0WRJ7	FKBP20-2	Peptidyl-prolyl cis-trans isomerase FKBP20-2, chloroplastic (PPIase FKBP20-2) (EC 5.2.1.8) (FK506-binding protein 20-2) (AtFKBP20-2) (Immunophilin FKBP20-2) (Rotamase)	NaN	NaN	NaN	NaN	NaN	NaN	NaN	NaN	1	1	1	8.3	8.3	8.3	27.192	3.2394	1160800	726690	434110	NaN	NaN	NaN	NaN	NaN	NaN	NaN	NaN	NaN	NaN	NaN	NaN	NaN	NaN	NaN	NaN	NaN	NaN	-0.00976557	NaN
AT3G07660	Q0WUY5	At3g07660	Flocculation protein (DUF1296)	NaN	NaN	NaN	NaN	NaN	NaN	NaN	NaN	1	1	1	1.7	1.7	1.7	90.075	3.3686	1539000	823730	715240	NaN	NaN	NaN	NaN	NaN	NaN	NaN	NaN	NaN	NaN	NaN	-0.248373	NaN	NaN	NaN	NaN	NaN	0.330471	NaN	0.226076
AT4G15560	Q38854	DXS	1-deoxy-D-xylulose-5-phosphate synthase, chloroplastic (1-deoxyxylulose-5-phosphate synthase) (DXP synthase) (DXPS) (EC 2.2.1.7) (Protein CLOROPLASTOS ALTERADOS 1)	NaN	NaN	NaN	NaN	NaN	NaN	NaN	NaN	1	1	1	4.6	4.6	4.6	76.832	59.96	971820	692620	279200	NaN	NaN	NaN	NaN	NaN	NaN	NaN	NaN	NaN	NaN	NaN	NaN	NaN	NaN	NaN	NaN	NaN	NaN	0.425209	NaN
AT2G41430	Q39096-2;Q39096	ERD15	Protein EARLY RESPONSIVE TO DEHYDRATION 15 (PAM2-containing protein CID1) (Polyadenylate-binding protein-interacting protein 1) (PABP-interacting protein 1) (Poly(A)-binding protein-interacting protein 1) (Protein CTC-INTERACTING DOMAIN 1) (Protein LIGHT STRESS-REGULATED 1)	NaN	NaN	NaN	NaN	NaN	NaN	NaN	NaN	1	1	1	13.3	13.3	13.3	13.63	5.0472	1399300	1399300	0	NaN	NaN	NaN	NaN	NaN	NaN	NaN	NaN	NaN	NaN	NaN	NaN	NaN	NaN	NaN	NaN	NaN	NaN	NaN	NaN
AT1G17720	Q39247-2;Q39247	PP2AB2	Serine/threonine protein phosphatase 2A 55 kDa regulatory subunit B beta isoform (AtB beta) (PP2A, subunit B, beta isoform)	NaN	NaN	NaN	NaN	NaN	NaN	NaN	NaN	1	1	1	3.6	3.6	3.6	56.175	3.4898	198320	123100	75225	NaN	NaN	NaN	NaN	NaN	NaN	NaN	NaN	NaN	NaN	NaN	NaN	NaN	NaN	NaN	NaN	NaN	NaN	NaN	NaN
AT1G48610	Q3ECU3;Q94AD1	At1g48610	AT hook motif-containing protein;Putative DNA-binding protein At1g48610 (AT-hook DNA-binding motif-containing protein At1g48610)	NaN	NaN	NaN	NaN	NaN	NaN	NaN	NaN	1	1	1	8.6	8.6	8.6	20.208	51.373	521990	320520	201470	NaN	NaN	NaN	NaN	NaN	NaN	NaN	NaN	NaN	NaN	NaN	NaN	NaN	NaN	NaN	NaN	NaN	NaN	NaN	-0.0492594
AT4G08920	Q43125	CRY1	Cryptochrome-1 (AtCry) (Atcry1) (Blue light photoreceptor) (Protein BLUE LIGHT UNINHIBITED 1) (Protein ELONGATED HYPOCOTYL 4) (Protein OUT OF PHASE 2) (OOP2)	NaN	NaN	NaN	NaN	NaN	NaN	NaN	NaN	1	1	1	2.6	2.6	2.6	76.694	13.043	100190	57416	42773	NaN	NaN	NaN	NaN	NaN	NaN	NaN	NaN	NaN	NaN	NaN	NaN	NaN	NaN	NaN	NaN	NaN	NaN	NaN	NaN
AT5G04440	Q500X2	At5g04440	At5g04440 (RAP release 2, galactose-binding-like domain protein, putative (DUF1997))	NaN	NaN	NaN	NaN	NaN	NaN	NaN	NaN	1	1	1	7.8	7.8	7.8	28.156	4.4801	2141700	1165900	975780	NaN	NaN	NaN	NaN	NaN	NaN	NaN	NaN	NaN	NaN	NaN	NaN	NaN	NaN	NaN	NaN	NaN	-0.189911	0.238828	NaN
AT2G01755	Q570J5	At2g01755	Uncharacterized protein At2g01755	NaN	NaN	NaN	NaN	NaN	NaN	NaN	NaN	1	1	1	9.2	9.2	9.2	19.59	43.439	1442300	826500	615780	NaN	NaN	NaN	NaN	NaN	NaN	NaN	NaN	NaN	NaN	NaN	NaN	NaN	NaN	NaN	NaN	NaN	NaN	0.274673	NaN
AT2G36070	Q5XF06	TIM44-2	Mitochondrial import inner membrane translocase subunit TIM44-2	NaN	NaN	NaN	NaN	NaN	NaN	NaN	NaN	1	1	1	4.7	4.7	4.7	53.645	3.5233	398490	225620	172870	NaN	NaN	NaN	NaN	NaN	NaN	NaN	NaN	NaN	NaN	NaN	NaN	NaN	-0.0602503	NaN	NaN	NaN	NaN	NaN	NaN
AT3G11700;AT5G06390	Q66GR0;Q93W32	FLA17;FLA18	Fasciclin-like arabinogalactan protein 17;Fasciclin-like arabinogalactan protein 18	NaN	NaN	NaN	NaN	NaN	NaN	NaN	NaN	1	1	1	3.1	3.1	3.1	50.408	8.4757	0	0	0	NaN	NaN	NaN	NaN	NaN	NaN	NaN	NaN	NaN	NaN	NaN	NaN	NaN	NaN	NaN	NaN	NaN	NaN	NaN	NaN
AT2G02740	Q66GR6-2;Q66GR6	WHY3	Single-stranded DNA-binding protein WHY3, chloroplastic (Protein PLASTID TRANSCRIPTIONALLY ACTIVE 11) (Protein WHIRLY 3) (AtWHY3)	NaN	NaN	NaN	NaN	NaN	NaN	NaN	NaN	1	1	1	6	6	6	29.64	3.0104	584060	275790	308270	NaN	NaN	NaN	NaN	NaN	NaN	NaN	NaN	NaN	NaN	NaN	NaN	NaN	NaN	NaN	NaN	NaN	NaN	NaN	NaN
AT2G21370	Q67XN5;Q8L794	XK-1	D-ribulose kinase (D-ribulokinase) (EC 2.7.1.47) (Inactive Xylulose kinase 1) (Atxk-1)	NaN	NaN	NaN	NaN	NaN	NaN	NaN	NaN	1	1	1	3.9	3.9	3.9	41.731	14.878	437450	247260	190190	NaN	NaN	NaN	NaN	NaN	NaN	NaN	NaN	NaN	NaN	NaN	NaN	NaN	NaN	NaN	NaN	NaN	NaN	NaN	NaN
AT1G60990	Q681Y3	At1g60990	Putative transferase At1g60990, chloroplastic (EC 2.1.-.-) (Iron-sulfur cluster assembly factor homolog COG0354)	NaN	NaN	NaN	NaN	NaN	NaN	NaN	NaN	1	1	1	3.9	3.9	3.9	47.008	3.7649	762640	372380	390270	NaN	NaN	NaN	NaN	NaN	NaN	NaN	NaN	NaN	NaN	NaN	NaN	NaN	NaN	NaN	NaN	NaN	NaN	NaN	NaN
AT4G15410	Q7Y175	PUX5	Plant UBX domain-containing protein 5 (PUX5)	NaN	NaN	NaN	NaN	NaN	NaN	NaN	NaN	1	1	1	4.8	4.8	4.8	44.996	4.9933	0	0	0	NaN	NaN	NaN	NaN	NaN	NaN	NaN	NaN	NaN	NaN	NaN	NaN	NaN	NaN	NaN	NaN	NaN	NaN	NaN	NaN
AT2G05140;AT2G37690	Q9SJ42;Q84TI2	At2g05140;At2g37690	Phosphoribosylaminoimidazole carboxylase like protein (Phosphoribosylaminoimidazole carboxylase, putative / AIR carboxylase) (Putative phosphoribosylaminoimidazole carboxylase);Phosphoribosylaminoimidazole carboxylase family protein / AIR carboxylase family protein (Putative phosphoribosylaminoimidazole carboxylase)	NaN	NaN	NaN	NaN	NaN	NaN	NaN	NaN	1	1	1	9.3	9.3	9.3	17.418	3.9117	0	0	0	NaN	NaN	NaN	NaN	NaN	NaN	NaN	NaN	NaN	NaN	NaN	NaN	NaN	NaN	NaN	NaN	NaN	NaN	NaN	NaN
AT5G63420	Q84W56	emb2746	Ribonuclease J (RNase J) (EC 3.1.-.-) (Protein EMBRYO DEFECTIVE 2746)	NaN	NaN	NaN	NaN	NaN	NaN	NaN	NaN	1	1	1	2	2	2	100.55	2.8357	245820	147570	98247	NaN	NaN	NaN	NaN	NaN	NaN	NaN	NaN	NaN	NaN	NaN	NaN	NaN	NaN	NaN	NaN	NaN	NaN	NaN	NaN
AT1G27740;AT4G33880	Q8LEG1;Q84WK0	BHLH54;BHLH85	Transcription factor bHLH54 (Basic helix-loop-helix protein 54) (AtbHLH54) (bHLH 54) (Transcription factor EN 114) (bHLH transcription factor bHLH054);Transcription factor bHLH85 (Basic helix-loop-helix protein 85) (AtbHLH85) (bHLH 85) (Transcription factor EN 115) (bHLH transcription factor bHLH085)	NaN	NaN	NaN	NaN	NaN	NaN	NaN	NaN	1	1	1	5.8	5.8	5.8	29.159	2.881	2565800	1765000	800830	NaN	NaN	NaN	NaN	NaN	NaN	NaN	NaN	-0.518021	NaN	NaN	NaN	NaN	NaN	NaN	NaN	NaN	NaN	NaN	NaN
AT1G04620	Q8GS60	HCAR	7-hydroxymethyl chlorophyll a reductase, chloroplastic (EC 1.17.7.2)	NaN	NaN	NaN	NaN	NaN	NaN	NaN	NaN	1	1	1	4.5	4.5	4.5	51.661	3.9667	247460	118800	128660	NaN	NaN	NaN	NaN	NaN	NaN	NaN	NaN	NaN	NaN	NaN	NaN	NaN	NaN	NaN	NaN	NaN	NaN	NaN	NaN
AT4G16390	Q8GWE0	P67	Pentatricopeptide repeat-containing protein At4g16390, chloroplastic (Chloroplastic RNA-binding protein P67) (Protein SUPPRESSOR OF VARIEGATION 7)	NaN	NaN	NaN	NaN	NaN	NaN	NaN	NaN	1	1	1	2.1	2.1	2.1	78.242	5.1567	3294300	2209700	1084600	NaN	NaN	NaN	NaN	NaN	NaN	NaN	NaN	NaN	NaN	NaN	NaN	NaN	NaN	NaN	NaN	NaN	0.408446	NaN	0.487956
AT5G60620	Q8GWG0	GPAT9	Glycerol-3-phosphate acyltransferase 9 (AtGPAT9) (EC 2.3.1.15)	NaN	NaN	NaN	NaN	NaN	NaN	NaN	NaN	1	1	1	6.1	6.1	6.1	43.02	5.6383	472660	267960	204700	NaN	NaN	NaN	NaN	NaN	NaN	NaN	NaN	NaN	NaN	NaN	NaN	NaN	NaN	NaN	NaN	NaN	NaN	NaN	NaN
AT1G64550	Q8H0V6	ABCF3	ABC transporter F family member 3 (ABC transporter ABCF.3) (AtABCF3) (GCN20-type ATP-binding cassette protein GCN3)	NaN	NaN	NaN	NaN	NaN	NaN	NaN	NaN	1	1	1	2	2	2	79.643	8.5773	73524	73524	0	NaN	NaN	NaN	NaN	NaN	NaN	NaN	NaN	NaN	NaN	NaN	NaN	NaN	NaN	NaN	NaN	NaN	NaN	NaN	NaN
AT5G50960	Q8H1Q2	NBP35	Cytosolic Fe-S cluster assembly factor NBP35 (Nucleotide binding protein 35) (AtNBP35)	NaN	NaN	NaN	NaN	NaN	NaN	NaN	NaN	1	1	1	5.1	5.1	5.1	37.306	2.8378	601160	326290	274870	NaN	NaN	NaN	NaN	NaN	NaN	NaN	NaN	NaN	NaN	NaN	NaN	NaN	NaN	NaN	NaN	0.00261882	-0.147211	NaN	NaN
AT5G13050	Q8L539-2;Q8L539	5FCL	5-formyltetrahydrofolate cyclo-ligase, mitochondrial (5-FCL) (EC 6.3.3.2)	NaN	NaN	NaN	NaN	NaN	NaN	NaN	NaN	1	1	1	10.3	10.3	10.3	24.137	11.021	714840	487430	227410	NaN	NaN	NaN	NaN	NaN	NaN	NaN	NaN	NaN	NaN	NaN	NaN	NaN	NaN	NaN	NaN	NaN	NaN	0.274532	-0.499154
AT5G42220	Q8L745	At5g42220	AT5g42220/K5J14_2 (Ubiquitin-like superfamily protein)	NaN	NaN	NaN	NaN	NaN	NaN	NaN	NaN	1	1	1	3	3	3	92.553	4.4616	574140	431760	142380	NaN	NaN	NaN	NaN	NaN	NaN	NaN	NaN	NaN	NaN	NaN	NaN	NaN	NaN	NaN	NaN	NaN	NaN	NaN	NaN
AT3G05970	Q8LPS1	LACS6	Long chain acyl-CoA synthetase 6, peroxisomal (EC 6.2.1.3)	NaN	NaN	NaN	NaN	NaN	NaN	NaN	NaN	1	1	1	3	3	3	76.603	2.6134	104920	78794	26130	NaN	NaN	NaN	NaN	NaN	NaN	NaN	NaN	NaN	NaN	NaN	NaN	NaN	NaN	NaN	NaN	NaN	NaN	NaN	NaN
AT4G31390	Q8RWG1-2;Q8RWG1	ABC1K1	Protein ACTIVITY OF BC1 COMPLEX KINASE 1, chloroplastic (ABC1-LIKE KINASE 1) (EC 2.7.-.-) (EC 2.7.11.1) (Protein ABC1-LIKE KINASE RELATED TO CHLOROPHYLL DEGRADATION AND OXIDATIVE STRESS 1) (AtACDO1) (Protein BLEACHING AND DWARF IN RED LIGHT 1) (Protein PROTON GRADIENT REGULATION 6)	NaN	NaN	NaN	NaN	NaN	NaN	NaN	NaN	1	1	1	3.2	3.2	3.2	73.836	6.7695	1520400	1043600	476790	NaN	NaN	NaN	NaN	NaN	NaN	NaN	NaN	NaN	NaN	NaN	NaN	-0.235632	NaN	NaN	NaN	NaN	NaN	NaN	NaN
AT3G20790	Q8RWP0	At3g20790	NAD(P)-binding Rossmann-fold superfamily protein	NaN	NaN	NaN	NaN	NaN	NaN	NaN	NaN	1	1	1	3.9	3.9	3.9	38.578	21.987	3123000	2106700	1016300	NaN	NaN	NaN	NaN	-1.31412	NaN	NaN	NaN	NaN	-0.361153	NaN	NaN	NaN	NaN	NaN	NaN	0.757674	NaN	NaN	NaN
AT1G08630	Q8RXU4-2;Q8RXU4	THA1	Probable low-specificity L-threonine aldolase 1 (EC 4.1.2.48) (Threonine aldolase 1)	NaN	NaN	NaN	NaN	NaN	NaN	NaN	NaN	1	1	1	4.4	4.4	4.4	37.431	4.7047	83059000	40616000	42443000	NaN	NaN	NaN	NaN	NaN	NaN	NaN	NaN	NaN	NaN	NaN	NaN	NaN	NaN	NaN	NaN	NaN	NaN	NaN	NaN
AT2G33845	Q8RYC3	At2g33845	Expressed protein (Nucleic acid-binding, OB-fold-like protein)	NaN	NaN	NaN	NaN	NaN	NaN	NaN	NaN	1	1	1	9.9	9.9	9.9	20.122	5.3504	2095100	1104800	990320	NaN	-0.0785318	NaN	NaN	NaN	NaN	NaN	NaN	NaN	NaN	NaN	NaN	NaN	NaN	-0.165663	0.0481648	NaN	NaN	NaN	NaN
AT2G46375	Q8S8G5	At2g46375	Expressed protein	NaN	NaN	NaN	NaN	NaN	NaN	NaN	NaN	1	1	1	13	13	13	14.656	2.6575	1538200	971030	567210	NaN	NaN	NaN	NaN	NaN	NaN	NaN	NaN	NaN	NaN	NaN	NaN	NaN	NaN	NaN	NaN	NaN	NaN	NaN	NaN
AT5G14220	Q8S9J1-2;Q8S9J1	PPOX2	Protoporphyrinogen oxidase 2, chloroplastic/mitochondrial (PPO2) (EC 1.3.3.4) (Protein MATERNAL EFFECT EMBRYO ARREST 61)	NaN	NaN	NaN	NaN	NaN	NaN	NaN	NaN	1	1	1	3.3	3.3	3.3	52.218	2.6059	171150	0	171150	NaN	NaN	NaN	NaN	NaN	NaN	NaN	NaN	NaN	NaN	NaN	NaN	NaN	NaN	NaN	NaN	NaN	NaN	NaN	NaN
AT5G43600	Q8VXY9	UAH	Ureidoglycolate hydrolase (AtUAH) (EC 3.5.1.116) (Allantoate amidohydrolase 2) (AtAHH2) (Ureidoglycolate amidohydrolase)	NaN	NaN	NaN	NaN	NaN	NaN	NaN	NaN	1	1	1	3.8	3.8	3.8	51.486	2.7003	1740100	1072700	667400	NaN	NaN	NaN	NaN	-0.0264844	NaN	NaN	NaN	0.0185645	-0.0176596	NaN	NaN	NaN	NaN	NaN	NaN	NaN	NaN	NaN	NaN
AT2G22480	Q8VYN6	PFK5	ATP-dependent 6-phosphofructokinase 5, chloroplastic (ATP-PFK 5) (Phosphofructokinase 5) (EC 2.7.1.11) (Phosphohexokinase 5)	NaN	NaN	NaN	NaN	NaN	NaN	NaN	NaN	1	1	1	3.2	3.2	3.2	58.614	3.5413	211360	172300	39055	NaN	NaN	NaN	NaN	NaN	NaN	NaN	NaN	NaN	NaN	NaN	NaN	NaN	NaN	NaN	NaN	NaN	NaN	NaN	NaN
AT3G59840	Q8VZ93	F24G16.11	Allyl alcohol dehydrogenase-like protein	NaN	NaN	NaN	NaN	NaN	NaN	NaN	NaN	1	1	1	15.5	15.5	15.5	10.5	4.4069	1294700	589660	705060	NaN	NaN	NaN	NaN	NaN	NaN	NaN	NaN	NaN	NaN	NaN	NaN	NaN	NaN	NaN	NaN	NaN	NaN	NaN	NaN
AT3G23530	Q8VZH1	At3g23530	AT3g23510/MEE5_5 (Cyclopropane-fatty-acyl-phospholipid synthase)	NaN	NaN	NaN	NaN	NaN	NaN	NaN	NaN	1	1	1	2.2	2.2	2.2	98.061	5.447	95512	66998	28514	NaN	NaN	NaN	NaN	NaN	NaN	NaN	NaN	NaN	NaN	NaN	NaN	NaN	NaN	NaN	NaN	NaN	NaN	NaN	NaN
AT2G35800	Q8VZP7	At2g35800	Mitochondrial substrate carrier family protein (Putative mitochondrial carrier protein)	NaN	NaN	NaN	NaN	NaN	NaN	NaN	NaN	1	1	1	2.4	2.4	2.4	90.626	2.9874	821350	381280	440070	NaN	NaN	0.355963	0.429743	NaN	NaN	NaN	NaN	NaN	NaN	NaN	NaN	NaN	NaN	NaN	NaN	NaN	NaN	NaN	NaN
AT5G20650	Q93VM8	COPT5	Copper transporter 5 (AtCOPT5)	NaN	NaN	NaN	NaN	NaN	NaN	NaN	NaN	1	1	1	8.2	8.2	8.2	15.784	3.8182	4639900	2944100	1695700	NaN	NaN	NaN	NaN	NaN	NaN	NaN	NaN	NaN	NaN	NaN	NaN	NaN	NaN	NaN	NaN	NaN	NaN	-0.394545	-0.25271
AT5G35430	Q93ZI7		AT5g35440/MOK9_2 (Tetratricopeptide repeat (TPR)-like superfamily protein)	NaN	NaN	NaN	NaN	NaN	NaN	NaN	NaN	1	1	1	2.3	2.3	2.3	86.737	2.6603	333720	183410	150310	NaN	NaN	NaN	NaN	NaN	NaN	NaN	NaN	NaN	NaN	NaN	NaN	NaN	NaN	NaN	NaN	NaN	NaN	NaN	NaN
AT3G13860	Q93ZM7		Chaperonin CPN60-like 2, mitochondrial (HSP60-like 2)	NaN	NaN	NaN	NaN	NaN	NaN	NaN	NaN	1	1	1	2.3	2.3	2.3	60.466	10.964	2092300	929310	1163000	NaN	NaN	NaN	NaN	NaN	NaN	NaN	NaN	NaN	NaN	NaN	NaN	NaN	NaN	NaN	NaN	NaN	0.630555	NaN	NaN
AT4G12830	Q93ZN4	At4g12830	AT4g12830/T20K18_180 (Alpha/beta-Hydrolases superfamily protein)	NaN	NaN	NaN	NaN	NaN	NaN	NaN	NaN	1	1	1	4.6	4.6	4.6	43.762	8.4335	1070000	458150	611880	NaN	NaN	NaN	NaN	NaN	NaN	NaN	NaN	NaN	NaN	NaN	NaN	NaN	NaN	NaN	NaN	NaN	NaN	NaN	NaN
AT1G08480	Q941A6	SDH6	Succinate dehydrogenase subunit 6, mitochondrial	NaN	NaN	NaN	NaN	NaN	NaN	NaN	NaN	1	1	1	19	19	19	15.812	8.341	4569400	2061500	2507900	NaN	NaN	NaN	NaN	NaN	NaN	NaN	NaN	NaN	NaN	NaN	NaN	NaN	NaN	NaN	NaN	0.0874769	0.32299	NaN	NaN
AT3G50685	Q941E5		AT3g50680/T3A5_60 (Anti-muellerian hormone type-2 receptor)	NaN	NaN	NaN	NaN	NaN	NaN	NaN	NaN	1	1	1	20.3	20.3	20.3	16.137	2.6107	486040	429740	56296	NaN	NaN	NaN	NaN	NaN	NaN	NaN	NaN	NaN	NaN	NaN	NaN	NaN	NaN	NaN	NaN	NaN	NaN	NaN	NaN
AT1G14345	Q949S6	At1g14345	NAD(P)-linked oxidoreductase superfamily protein	NaN	NaN	NaN	NaN	NaN	NaN	NaN	NaN	1	1	1	3.6	3.6	3.6	21.223	2.5863	4155600	2135700	2019900	NaN	NaN	NaN	NaN	NaN	NaN	NaN	NaN	NaN	NaN	NaN	NaN	NaN	NaN	NaN	0.0189891	NaN	NaN	NaN	NaN
AT4G32330	Q94C48-2;Q94C48	At4g32330	Protein WVD2-like 5	NaN	NaN	NaN	NaN	NaN	NaN	NaN	NaN	1	1	1	3.4	3.4	3.4	47.455	19.199	1476600	853840	622770	NaN	NaN	NaN	NaN	NaN	NaN	NaN	NaN	NaN	NaN	NaN	NaN	NaN	0.0672079	-0.233565	NaN	NaN	NaN	NaN	NaN
AT1G31850;AT4G19120	Q94II3;Q9C6S7	ERD3	Probable methyltransferase PMT20 (EC 2.1.1.-);Probable methyltransferase PMT21 (EC 2.1.1.-) (Protein EARLY-RESPONSIVE TO DEHYDRATION 3)	NaN	NaN	NaN	NaN	NaN	NaN	NaN	NaN	1	1	1	2.2	2.2	2.2	68.33	3.6723	1427500	752530	674970	NaN	NaN	NaN	NaN	NaN	NaN	NaN	NaN	NaN	NaN	NaN	NaN	NaN	NaN	NaN	NaN	NaN	NaN	NaN	-0.190757
AT5G13430;AT5G13440	Q94JS0;Q9LYR2	At5g13430;T22N19_90	Cytochrome b-c1 complex subunit Rieske-1, mitochondrial (EC 1.10.2.2) (Complex III subunit 5-1) (Rieske iron-sulfur protein 1) (RISP1) (Ubiquinol-cytochrome c reductase iron-sulfur subunit 1);"Cytochrome b-c1 complex subunit Rieske-2, mitochondrial (EC 1.10.2.2) (Complex III subunit 5-2) (Rieske iron-sulfur protein 2) (RISP2) (Ubiquinol-cytochrome c reductase iron-sulfur subunit 2)"	NaN	NaN	NaN	NaN	NaN	NaN	NaN	NaN	1	1	1	7	7	7	29.607	2.7195	785230	537290	247930	NaN	NaN	NaN	NaN	NaN	NaN	NaN	NaN	NaN	NaN	NaN	NaN	NaN	NaN	NaN	NaN	NaN	NaN	NaN	NaN
AT1G20840	Q96290	MSSP1	Monosaccharide-sensing protein 1 (Monosaccharide transporter 1) (Sugar transporter MSSP1) (Sugar transporter MT1)	NaN	NaN	NaN	NaN	NaN	NaN	NaN	NaN	1	1	1	2.7	2.7	2.7	79.484	4.6046	306310	242690	63618	NaN	NaN	NaN	NaN	NaN	NaN	NaN	NaN	NaN	NaN	NaN	NaN	NaN	NaN	NaN	NaN	NaN	NaN	NaN	NaN
AT1G47200	Q9C500	WPP2	WPP domain-containing protein 2 (MFP1 attachment factor 2)	NaN	NaN	NaN	NaN	NaN	NaN	NaN	NaN	1	1	1	12.2	12.2	12.2	19.134	4.4423	118980	69997	48983	NaN	NaN	NaN	NaN	NaN	NaN	NaN	NaN	NaN	NaN	NaN	NaN	NaN	NaN	NaN	NaN	NaN	NaN	NaN	NaN
AT5G52560	Q9C5I1	USP	UDP-sugar pyrophosphorylase (AtUSP) (EC 2.7.7.64)	NaN	NaN	NaN	NaN	NaN	NaN	NaN	NaN	1	1	1	5	5	5	67.851	4.7831	170660	170660	0	NaN	NaN	NaN	NaN	NaN	NaN	NaN	NaN	NaN	NaN	NaN	NaN	NaN	NaN	NaN	NaN	NaN	NaN	NaN	NaN
AT1G26110	Q9C658-2;Q9C658	DCP5	Protein decapping 5	NaN	NaN	NaN	NaN	NaN	NaN	NaN	NaN	1	1	1	3.5	3.5	3.5	63.66	50.257	1710000	1077100	633000	NaN	NaN	NaN	NaN	NaN	NaN	NaN	NaN	NaN	NaN	NaN	NaN	NaN	NaN	NaN	NaN	NaN	NaN	0.316766	NaN
AT1G31530	Q9C6U7	F27M3_24	DNAse I-like superfamily protein	NaN	NaN	NaN	NaN	NaN	NaN	NaN	NaN	1	1	1	4.9	4.9	4.9	32.085	3.5105	8424200	2856200	5568000	NaN	NaN	NaN	NaN	NaN	NaN	NaN	NaN	NaN	NaN	NaN	NaN	NaN	NaN	NaN	NaN	NaN	NaN	NaN	NaN
AT1G32550	Q9C7Y4	FDC2	Ferredoxin C 2, chloroplastic (AtFdC2)	NaN	NaN	NaN	NaN	NaN	NaN	NaN	NaN	1	1	1	16.6	16.6	16.6	20.377	3.718	1226900	1057400	169490	NaN	NaN	NaN	NaN	NaN	NaN	NaN	NaN	NaN	NaN	NaN	NaN	NaN	NaN	NaN	NaN	NaN	NaN	NaN	NaN
AT1G52340	Q9C826	ABA2	Xanthoxin dehydrogenase (EC 1.1.1.288) (Protein GLUCOSE INSENSITIVE 1) (Protein IMPAIRED SUCROSE INDUCTION 4) (Protein SALOBRENO 3) (Protein SALT RESISTANT 1) (Protein SUGAR INSENSITIVE 4) (Short-chain alcohol dehydrogenase ABA2) (Short-chain dehydrogenase reductase 1) (AtSDR1) (Xanthoxin oxidase)	NaN	NaN	NaN	NaN	NaN	NaN	NaN	NaN	1	1	1	5.6	5.6	5.6	30.272	2.6488	0	0	0	NaN	NaN	NaN	NaN	NaN	NaN	NaN	NaN	NaN	NaN	NaN	NaN	NaN	NaN	NaN	NaN	NaN	NaN	NaN	NaN
AT1G70520	Q9CAL3	CRK2	Cysteine-rich receptor-like protein kinase 2 (Cysteine-rich RLK2) (EC 2.7.11.-)	NaN	NaN	NaN	NaN	NaN	NaN	NaN	NaN	1	1	1	2.2	2.2	2.2	72	11.447	236460	140240	96219	NaN	NaN	NaN	NaN	NaN	NaN	NaN	NaN	NaN	NaN	NaN	NaN	NaN	NaN	NaN	NaN	NaN	NaN	NaN	NaN
AT3G48720;AT5G63560	Q9FFQ7;Q9SMM7	At5g63560;T8P19.230	Fatty alcohol:caffeoyl-CoA acyltransferase (EC 2.3.1.-) (Fatty alcohol:caffeoyl-CoA caffeoyl transferase);HXXXD-type acyl-transferase family protein	NaN	NaN	NaN	NaN	NaN	NaN	NaN	NaN	1	1	1	2.8	2.8	2.8	47.112	4.4889	1538000	920170	617790	NaN	NaN	NaN	NaN	NaN	NaN	NaN	NaN	NaN	NaN	-0.430341	NaN	NaN	NaN	NaN	NaN	-0.444497	NaN	NaN	NaN
AT5G53170	Q9FGM0	FTSH11	ATP-dependent zinc metalloprotease FTSH 11, chloroplastic/mitochondrial (AtFTSH11) (EC 3.4.24.-)	NaN	NaN	NaN	NaN	NaN	NaN	NaN	NaN	1	1	1	2	2	2	88.716	8.644	583960	302620	281340	NaN	NaN	NaN	NaN	NaN	NaN	NaN	NaN	NaN	NaN	NaN	NaN	NaN	NaN	NaN	0.210559	NaN	NaN	NaN	NaN
AT5G51570	Q9FHM7	HIR4	Hypersensitive-induced response protein 4 (AtHIR4)	NaN	NaN	NaN	NaN	NaN	NaN	NaN	NaN	1	1	1	5.5	5.5	5.5	32.378	6.8026	187480	94717	92762	NaN	NaN	NaN	NaN	NaN	NaN	NaN	NaN	NaN	NaN	NaN	NaN	NaN	NaN	NaN	NaN	NaN	NaN	NaN	NaN
AT5G48930	Q9FI78	HST	Shikimate O-hydroxycinnamoyltransferase (EC 2.3.1.133) (Hydroxycinnamoyl transferase) (Hydroxycinnamoyl-Coenzyme A shikimate/quinate hydroxycinnamoyltransferase)	NaN	NaN	NaN	NaN	NaN	NaN	NaN	NaN	1	1	1	2.8	2.8	2.8	47.974	4.6029	2194200	1363100	831090	NaN	NaN	NaN	NaN	NaN	NaN	NaN	NaN	NaN	NaN	NaN	NaN	NaN	NaN	NaN	NaN	NaN	NaN	-0.166354	-0.295698
AT5G18200	Q9FK51		ADP-glucose phosphorylase (EC 2.7.7.-) (ADP-glucose:phosphate adenylyltransferase)	NaN	NaN	NaN	NaN	NaN	NaN	NaN	NaN	1	1	1	4.3	4.3	4.3	39.005	4.4081	135580	91720	43864	NaN	NaN	NaN	NaN	NaN	NaN	NaN	NaN	NaN	NaN	NaN	NaN	NaN	NaN	NaN	NaN	NaN	NaN	NaN	NaN
AT5G35735	Q9FKH6		Cytochrome b561 and DOMON domain-containing protein At5g35735 (Protein b561A.tha16)	NaN	NaN	NaN	NaN	NaN	NaN	NaN	NaN	1	1	1	4.5	4.5	4.5	43.867	3.5493	641780	332930	308850	NaN	NaN	NaN	NaN	NaN	NaN	NaN	NaN	NaN	NaN	NaN	NaN	NaN	0.270399	NaN	NaN	NaN	NaN	NaN	NaN
AT5G60460	Q9FKK1		Protein transport protein Sec61 subunit beta	NaN	NaN	NaN	NaN	NaN	NaN	NaN	NaN	1	1	1	22	22	22	10.865	29.052	152690	88245	64448	NaN	NaN	NaN	NaN	NaN	NaN	NaN	NaN	NaN	NaN	NaN	NaN	NaN	NaN	NaN	NaN	NaN	NaN	NaN	NaN
AT5G40870	Q9FKS0	UKL1	Uridine kinase-like protein 1, chloroplastic [Includes: Uridine kinase (UK) (EC 2.7.1.48);Putative uracil phosphoribosyltransferase (UPRTase) (EC 2.4.2.9) (UMP pyrophosphorylase)]	NaN	NaN	NaN	NaN	NaN	NaN	NaN	NaN	1	1	1	3.5	3.5	3.5	54.429	3.3267	243860	139870	103990	NaN	NaN	NaN	NaN	NaN	NaN	NaN	NaN	NaN	NaN	NaN	NaN	NaN	NaN	NaN	NaN	NaN	NaN	NaN	0.0209048
AT5G40150	Q9FL16	PER63	Peroxidase 63 (Atperox P63) (EC 1.11.1.7) (ATP26a)	NaN	NaN	NaN	NaN	NaN	NaN	NaN	NaN	1	1	1	5.5	5.5	5.5	36.12	8.3572	1520800	823880	696880	NaN	NaN	NaN	NaN	NaN	NaN	NaN	NaN	NaN	NaN	NaN	NaN	NaN	0.0313817	NaN	NaN	NaN	NaN	NaN	NaN
AT5G46310	Q9FL30	At5g46310	WRKY family transcription factor	NaN	NaN	NaN	NaN	NaN	NaN	NaN	NaN	1	1	1	5.1	5.1	5.1	41.937	2.737	19430000	10987000	8442400	NaN	NaN	NaN	NaN	NaN	NaN	NaN	NaN	NaN	NaN	NaN	NaN	NaN	NaN	NaN	NaN	NaN	NaN	NaN	NaN
AT5G64570	Q9FLG1	BXL4	Beta-D-xylosidase 4 (AtBXL4) (EC 3.2.1.37)	NaN	NaN	NaN	NaN	NaN	NaN	NaN	NaN	1	1	1	3.3	3.3	3.3	84.307	5.2833	677800	326550	351250	NaN	NaN	NaN	NaN	NaN	NaN	NaN	NaN	NaN	NaN	NaN	NaN	NaN	NaN	NaN	NaN	NaN	NaN	NaN	NaN
AT5G51750	Q9FLI4	SBT1.3	Subtilisin-like protease SBT1.3 (EC 3.4.21.-) (Subtilase subfamily 1 member 3) (AtSBT1.3)	NaN	NaN	NaN	NaN	NaN	NaN	NaN	NaN	1	1	1	1.4	1.4	1.4	84.949	2.7465	399630	190680	208960	NaN	NaN	NaN	NaN	NaN	NaN	0.455636	NaN	NaN	NaN	NaN	NaN	NaN	NaN	NaN	NaN	NaN	NaN	NaN	NaN
AT5G12200	Q9FMP3	PYD2	Dihydropyrimidinase (EC 3.5.2.2) (Dihydropyrimidine amidohydrolase) (Protein PYRIMIDINE 2)	NaN	NaN	NaN	NaN	NaN	NaN	NaN	NaN	1	1	1	5.1	5.1	5.1	57.991	2.5397	257180	184100	73078	NaN	NaN	NaN	NaN	NaN	NaN	NaN	NaN	NaN	NaN	NaN	NaN	NaN	NaN	NaN	NaN	NaN	NaN	NaN	NaN
AT3G55005	Q9FQ24	TON1B	Protein TONNEAU 1b	NaN	NaN	NaN	NaN	NaN	NaN	NaN	NaN	1	1	1	6.2	6.2	6.2	29.185	28.388	1054800	689750	365030	NaN	NaN	NaN	NaN	NaN	NaN	NaN	NaN	NaN	NaN	NaN	NaN	NaN	NaN	NaN	NaN	NaN	NaN	0.882829	0.318989
AT3G56910	Q9LER7	PSRP5	50S ribosomal protein 5, chloroplastic (Plastid-specific 50S ribosomal protein 5) (PSRP-5)	NaN	NaN	NaN	NaN	NaN	NaN	NaN	NaN	1	1	1	6.8	6.8	6.8	16.361	3.4813	5780700	1597400	4183300	NaN	NaN	NaN	NaN	NaN	NaN	NaN	NaN	NaN	NaN	NaN	NaN	NaN	NaN	NaN	NaN	NaN	NaN	1.38933	NaN
AT3G56860	Q9LES2	UBA2A	UBP1-associated protein 2A (UBP1-interacting protein 2a)	NaN	NaN	NaN	NaN	NaN	NaN	NaN	NaN	1	1	1	3.3	3.3	3.3	51.438	2.9008	172950	72264	100690	NaN	NaN	NaN	NaN	NaN	NaN	NaN	NaN	NaN	NaN	NaN	NaN	NaN	NaN	NaN	NaN	NaN	NaN	NaN	NaN
AT3G21360	Q9LIG0		Clavaminate synthase-like protein At3g21360 (EC 1.-.-.-)	NaN	NaN	NaN	NaN	NaN	NaN	NaN	NaN	1	1	1	4.2	4.2	4.2	37.211	3.1598	99293	40589	58705	NaN	NaN	NaN	NaN	NaN	NaN	NaN	NaN	NaN	NaN	NaN	NaN	NaN	NaN	NaN	NaN	NaN	NaN	NaN	NaN
AT1G01300	Q9LNJ3	F6F3.10	Aspartyl protease family protein 2 (EC 3.4.23.-)	NaN	NaN	NaN	NaN	NaN	NaN	NaN	NaN	1	1	1	5.2	5.2	5.2	52.175	3.0095	302730	180590	122140	NaN	NaN	NaN	NaN	NaN	NaN	NaN	NaN	NaN	NaN	NaN	NaN	NaN	NaN	NaN	NaN	NaN	NaN	NaN	NaN
AT3G24190	Q9LRN0	At3g24190	AT3g24190/MUJ8_17 (Protein kinase superfamily protein)	NaN	NaN	NaN	NaN	NaN	NaN	NaN	NaN	1	1	1	2.5	2.5	2.5	87.436	3.3892	1182000	659300	522670	NaN	NaN	NaN	NaN	NaN	NaN	NaN	NaN	NaN	NaN	NaN	NaN	NaN	NaN	NaN	NaN	NaN	NaN	0.112631	0.0943557
AT3G21790	Q9LSY5	UGT71B7	UDP-glycosyltransferase 71B7 (EC 2.4.1.-)	NaN	NaN	NaN	NaN	NaN	NaN	NaN	NaN	1	1	1	4	4	4	55.627	2.9755	366030	215520	150520	NaN	NaN	NaN	NaN	NaN	NaN	NaN	NaN	NaN	NaN	NaN	NaN	NaN	NaN	NaN	NaN	NaN	NaN	NaN	NaN
AT3G16250	Q9LU21	PNSB3	Photosynthetic NDH subunit of subcomplex B 3, chloroplastic (Protein PnsB3) (NDH-DEPENDENT CYCLIC ELECTRON FLOW 4)	NaN	NaN	NaN	NaN	NaN	NaN	NaN	NaN	1	1	1	12.3	12.3	12.3	22.418	13.595	1706900	998090	708770	NaN	NaN	NaN	NaN	NaN	NaN	NaN	NaN	NaN	NaN	NaN	NaN	NaN	NaN	NaN	NaN	NaN	NaN	0.193787	NaN
AT3G17810	Q9LVI9	PYD1	Dihydropyrimidine dehydrogenase (NADP(+)), chloroplastic (DHPDH) (DPD) (EC 1.3.1.2) (Dihydroorotate dehydrogenase-like protein) (Dihydrothymine dehydrogenase) (Dihydrouracil dehydrogenase) (Protein PYRIMIDINE 1)	NaN	NaN	NaN	NaN	NaN	NaN	NaN	NaN	1	1	1	5.2	5.2	5.2	46.846	6.9314	2204200	1309300	894850	NaN	NaN	NaN	NaN	NaN	NaN	NaN	NaN	NaN	NaN	NaN	NaN	NaN	0.247241	0.0509459	NaN	NaN	NaN	NaN	NaN
AT5G52960	Q9LVV6		At5g52960 (tRNA dimethylallyltransferase)	NaN	NaN	NaN	NaN	NaN	NaN	NaN	NaN	1	1	1	9.4	9.4	9.4	19.163	3.4861	676140	411730	264410	NaN	NaN	NaN	NaN	NaN	NaN	-0.156867	0.290814	NaN	NaN	NaN	NaN	NaN	NaN	NaN	NaN	NaN	NaN	NaN	NaN
AT3G43720	Q9LZH5-3;Q9LZH5-2;Q9LZH5	LTPG2	Non-specific lipid transfer protein GPI-anchored 2 (AtLTPG-2) (Protein LTP-GPI-ANCHORED 2) (Xylogen-like protein 5) (AtXYP5)	NaN	NaN	NaN	NaN	NaN	NaN	NaN	NaN	1	1	1	17.1	17.1	17.1	18.685	22.103	7479700	4497800	2981900	-0.225311	NaN	-1.20398	NaN	NaN	NaN	NaN	NaN	NaN	NaN	NaN	NaN	NaN	-0.0899663	NaN	NaN	NaN	0.0487736	-0.426537	NaN
AT3G62820	Q9LZI3	F26K9_250	Plant invertase/pectin methylesterase inhibitor superfamily protein (Putative pectinesterase)	NaN	NaN	NaN	NaN	NaN	NaN	NaN	NaN	1	1	1	6.2	6.2	6.2	21.459	3.3231	999800	595380	404420	NaN	NaN	NaN	NaN	NaN	NaN	NaN	NaN	NaN	NaN	NaN	NaN	NaN	NaN	NaN	NaN	NaN	NaN	0.221799	NaN
AT4G29480	Q9M0D5	At4g29480	AT4g29480/F17A13_300 (Copia-like retroelement pol polyprotein) (Mitochondrial ATP synthase subunit G protein)	NaN	NaN	NaN	NaN	NaN	NaN	NaN	NaN	1	1	1	9	9	9	13.94	9.4512	6062000	3546900	2515100	NaN	-0.806903	NaN	NaN	NaN	NaN	-0.906354	NaN	-0.990611	NaN	NaN	NaN	NaN	NaN	NaN	NaN	NaN	NaN	-0.1144	NaN
AT1G08780	Q9M4B5	AIP3	Probable prefoldin subunit 4 (ABI3-interacting protein 3)	NaN	NaN	NaN	NaN	NaN	NaN	NaN	NaN	1	1	1	9.3	9.3	9.3	14.88	8.4446	3209400	1937100	1272300	NaN	NaN	NaN	NaN	NaN	NaN	NaN	NaN	NaN	NaN	NaN	NaN	NaN	NaN	NaN	NaN	NaN	NaN	NaN	-0.182564
AT3G02720	Q9M8R4	DJ1D	Protein DJ-1 homolog D (AtDJ1D) (Lactoylglutathione lyase DJ1D) (EC 4.4.1.5)	NaN	NaN	NaN	NaN	NaN	NaN	NaN	NaN	1	1	1	4.1	4.1	4.1	41.645	8.4113	2008900	1128200	880640	NaN	NaN	NaN	NaN	NaN	NaN	NaN	NaN	0.11414	NaN	NaN	NaN	NaN	-0.0283214	NaN	NaN	NaN	NaN	NaN	NaN
AT3G02130	Q9S7I6	RPK2	LRR receptor-like serine/threonine-protein kinase RPK2 (EC 2.7.11.1) (Protein TOADSTOOL 2) (Receptor-like protein kinase 2)	NaN	NaN	NaN	NaN	NaN	NaN	NaN	NaN	1	1	1	2.1	2.1	2.1	125.23	2.7878	690940	0	690940	NaN	NaN	NaN	NaN	NaN	NaN	NaN	NaN	NaN	NaN	NaN	NaN	NaN	NaN	NaN	NaN	NaN	NaN	NaN	NaN
AT1G70940	Q9S7Z8	PIN3	Auxin efflux carrier component 3 (AtPIN3)	NaN	NaN	NaN	NaN	NaN	NaN	NaN	NaN	1	1	1	2.3	2.3	2.3	69.465	4.7189	135510	83769	51737	NaN	NaN	NaN	NaN	NaN	NaN	NaN	NaN	NaN	NaN	NaN	NaN	NaN	NaN	NaN	NaN	NaN	NaN	NaN	NaN
AT3G51510	Q9SCZ8	F26O13.150	AT3g51510/F26O13_150 (Transmembrane protein)	NaN	NaN	NaN	NaN	NaN	NaN	NaN	NaN	1	1	1	10.5	10.5	10.5	19.846	7.4153	504520	328910	175610	NaN	NaN	NaN	NaN	NaN	NaN	NaN	NaN	NaN	NaN	NaN	NaN	NaN	NaN	NaN	NaN	NaN	NaN	NaN	NaN
AT3G47060	Q9SD67	FTSH7	ATP-dependent zinc metalloprotease FTSH 7, chloroplastic (AtFTSH7) (EC 3.4.24.-)	NaN	NaN	NaN	NaN	NaN	NaN	NaN	NaN	1	1	1	3.5	3.5	3.5	87.801	5.4111	3511200	1732500	1778700	NaN	NaN	NaN	NaN	NaN	NaN	NaN	NaN	0.0425966	NaN	NaN	NaN	NaN	NaN	NaN	NaN	NaN	NaN	NaN	NaN
AT2G38760	Q9SE45	ANN3	Annexin D3 (AnnAt3)	NaN	NaN	NaN	NaN	NaN	NaN	NaN	NaN	1	1	1	4.4	4.4	4.4	36.255	7.4278	0	0	0	NaN	NaN	NaN	NaN	NaN	NaN	NaN	NaN	NaN	NaN	NaN	NaN	NaN	NaN	NaN	NaN	NaN	NaN	NaN	NaN
AT3G07100	Q9SFU0		Protein transport protein Sec24-like At3g07100	NaN	NaN	NaN	NaN	NaN	NaN	NaN	NaN	1	1	1	1.5	1.5	1.5	113.96	3.1775	321120	162100	159020	NaN	NaN	NaN	NaN	NaN	NaN	NaN	NaN	NaN	NaN	NaN	NaN	NaN	NaN	NaN	NaN	NaN	NaN	NaN	NaN
AT1G64680	Q9SGU7	At1g64680	At1g64680 (Beta-carotene isomerase D27) (F1N19.25)	NaN	NaN	NaN	NaN	NaN	NaN	NaN	NaN	1	1	1	6.4	6.4	6.4	28.162	3.4728	2295000	1111700	1183300	0.357201	NaN	NaN	NaN	NaN	NaN	NaN	NaN	NaN	NaN	NaN	0.0904943	NaN	NaN	0.375528	NaN	NaN	NaN	NaN	NaN
AT1G17210	Q9SHI0	F20D23.9	F20D23.9 protein (IAP-like protein 1)	NaN	NaN	NaN	NaN	NaN	NaN	NaN	NaN	1	1	1	1.8	1.8	1.8	103.09	3.3082	124050	77581	46470	NaN	NaN	NaN	NaN	NaN	NaN	NaN	NaN	NaN	NaN	NaN	NaN	NaN	NaN	NaN	NaN	NaN	NaN	0.0750575	NaN
AT2G15290	Q9SHU7	TIC21	Protein TIC 21, chloroplastic (Protein CHLOROPLAST IMPORT APPARATUS 5) (AtCIA5) (Protein PERMEASE IN CHLOROPLASTS 1) (AtPIC1) (Translocon at the inner envelope membrane of chloroplasts 21) (AtTIC21)	NaN	NaN	NaN	NaN	NaN	NaN	NaN	NaN	1	1	1	4.7	4.7	4.7	31.276	2.624	1439500	853670	585850	NaN	NaN	NaN	NaN	NaN	NaN	NaN	NaN	NaN	NaN	NaN	NaN	NaN	NaN	NaN	NaN	NaN	NaN	NaN	NaN
AT2G03870	Q9SI54	LSM7	Sm-like protein LSM7 (AtLSM7) (Protein EMBRYO DEFECTIVE 2816) (U6 snRNA-associated Sm-like protein LSM7)	NaN	NaN	NaN	NaN	NaN	NaN	NaN	NaN	1	1	1	26.3	26.3	26.3	10.773	5.9132	1437100	820980	616150	NaN	NaN	NaN	NaN	NaN	NaN	NaN	NaN	NaN	NaN	NaN	NaN	NaN	NaN	NaN	-0.228962	NaN	NaN	0.21621	NaN
AT2G31390	Q9SID0		Probable fructokinase-1 (EC 2.7.1.4)	NaN	NaN	NaN	NaN	NaN	NaN	NaN	NaN	1	1	1	9.8	9.8	9.8	35.275	58.227	797150	516680	280470	NaN	NaN	NaN	NaN	NaN	NaN	NaN	NaN	NaN	NaN	NaN	NaN	NaN	NaN	NaN	NaN	NaN	NaN	NaN	NaN
AT2G42770	Q9SJH9		Expressed protein (Peroxisomal membrane 22 kDa (Mpv17/PMP22) family protein)	NaN	NaN	NaN	NaN	NaN	NaN	NaN	NaN	1	1	1	9.1	9.1	9.1	25.915	3.5026	1248700	645550	603140	NaN	NaN	NaN	NaN	NaN	NaN	NaN	NaN	NaN	NaN	NaN	NaN	NaN	NaN	NaN	0.120075	NaN	NaN	NaN	NaN
AT2G36870	Q9SJL9	XTH32	Probable xyloglucan endotransglucosylase/hydrolase protein 32 (At-XTH32) (XTH-32) (EC 2.4.1.207)	NaN	NaN	NaN	NaN	NaN	NaN	NaN	NaN	1	1	1	4	4	4	34.482	4.2749	1910700	1241500	669260	NaN	NaN	NaN	NaN	NaN	NaN	NaN	NaN	NaN	NaN	NaN	NaN	NaN	NaN	NaN	NaN	-0.592816	NaN	NaN	-0.425279
AT1G22430	Q9SK86		Alcohol dehydrogenase-like 1 (EC 1.1.1.1)	NaN	NaN	NaN	NaN	NaN	NaN	NaN	NaN	1	1	1	3.6	3.6	3.6	42.529	3.0004	1464500	796130	668390	NaN	NaN	NaN	NaN	NaN	NaN	NaN	NaN	NaN	NaN	NaN	NaN	NaN	NaN	NaN	NaN	-0.172379	NaN	NaN	NaN
AT2G46430	Q9SKD7	CNGC3	Probable cyclic nucleotide-gated ion channel 3 (AtCNGC3) (Cyclic nucleotide- and calmodulin-regulated ion channel 3)	NaN	NaN	NaN	NaN	NaN	NaN	NaN	NaN	1	1	1	1.8	1.8	1.8	81.668	3.2742	36657000	18906000	17751000	NaN	NaN	NaN	NaN	NaN	NaN	NaN	NaN	NaN	NaN	NaN	NaN	NaN	NaN	NaN	NaN	NaN	NaN	NaN	NaN
AT3G46630	Q9SNB5	F12A12.150	DCL protein (DUF3223)	NaN	NaN	NaN	NaN	NaN	NaN	NaN	NaN	1	1	1	4.8	4.8	4.8	24.191	2.5424	5024500	2870100	2154400	NaN	NaN	NaN	NaN	NaN	NaN	NaN	NaN	NaN	NaN	NaN	NaN	-0.45629	-0.300787	NaN	-0.371473	NaN	NaN	0.0323643	NaN
AT3G03980	Q9SQR4	T11I18.9	NADPH-dependent aldehyde reductase-like protein, chloroplastic (EC 1.1.1.-)	NaN	NaN	NaN	NaN	NaN	NaN	NaN	NaN	1	1	1	5.6	5.6	5.6	28.146	4.7945	341580	229530	112050	NaN	NaN	NaN	NaN	NaN	NaN	NaN	NaN	NaN	NaN	NaN	NaN	NaN	NaN	NaN	NaN	NaN	NaN	NaN	NaN
AT3G04780	Q9SQZ9		PITH domain-containing protein At3g04780	NaN	NaN	NaN	NaN	NaN	NaN	NaN	NaN	1	1	1	17	17	17	19.67	8.0859	736030	547450	188580	NaN	NaN	NaN	NaN	NaN	NaN	NaN	NaN	NaN	NaN	NaN	NaN	NaN	NaN	NaN	NaN	NaN	NaN	0.299767	NaN
AT3G09050	Q9SS82	MZB10.8	8-amino-7-oxononanoate synthase (At3g09050) (MZB10.8 protein)	NaN	NaN	NaN	NaN	NaN	NaN	NaN	NaN	1	1	1	8.5	8.5	8.5	29.249	3.4176	1463600	740490	723140	NaN	NaN	NaN	NaN	NaN	NaN	NaN	0.201505	NaN	NaN	NaN	NaN	NaN	NaN	NaN	NaN	0.321658	0.214666	NaN	NaN
AT1G54100	Q9SYG7	ALDH7B4	Aldehyde dehydrogenase family 7 member B4 (EC 1.2.1.3) (Antiquitin-1) (Turgor-responsive ALDH)	NaN	NaN	NaN	NaN	NaN	NaN	NaN	NaN	1	1	1	2.4	2.4	2.4	54.208	2.9647	116130	75482	40646	NaN	NaN	NaN	NaN	NaN	NaN	NaN	NaN	NaN	NaN	NaN	NaN	NaN	NaN	NaN	NaN	NaN	NaN	NaN	NaN
AT4G39150	Q9T024	T22F8.50	AT4g39150/T22F8_50 (DNAJ heat shock N-terminal domain-containing protein) (DnaJ-like protein)	NaN	NaN	NaN	NaN	NaN	NaN	NaN	NaN	1	1	1	6.1	6.1	6.1	38.461	2.9235	614480	348530	265950	NaN	NaN	NaN	NaN	NaN	NaN	NaN	NaN	NaN	NaN	NaN	NaN	NaN	NaN	NaN	NaN	NaN	NaN	NaN	NaN
AT4G13340	Q9T0K5	LRX3	Leucine-rich repeat extensin-like protein 3 (AtLRX3) (LRR/EXTENSIN3) (Cell wall hydroxyproline-rich glycoprotein)	NaN	NaN	NaN	NaN	NaN	NaN	NaN	NaN	1	1	1	2.8	2.8	2.8	82.245	2.7292	540910	322920	218000	NaN	NaN	NaN	NaN	NaN	NaN	NaN	NaN	NaN	NaN	NaN	NaN	NaN	NaN	NaN	NaN	NaN	NaN	NaN	NaN
AT3G46560	Q9XGX9	TIM9	Mitochondrial import inner membrane translocase subunit TIM9 (Protein EMBRYO DEFECTIVE 2474)	NaN	NaN	NaN	NaN	NaN	NaN	NaN	NaN	1	1	1	12.9	12.9	12.9	10.715	2.9506	665140	513590	151550	NaN	NaN	NaN	NaN	NaN	NaN	NaN	NaN	NaN	NaN	NaN	NaN	NaN	NaN	NaN	NaN	NaN	NaN	NaN	NaN
AT2G16070	Q9XII1	PDV2	Plastid division protein PDV2 (Protein PLASTID DIVISION2)	NaN	NaN	NaN	NaN	NaN	NaN	NaN	NaN	1	1	1	5.5	5.5	5.5	33.64	3.592	545760	276620	269140	NaN	NaN	NaN	NaN	NaN	NaN	NaN	NaN	NaN	NaN	NaN	NaN	NaN	NaN	NaN	NaN	NaN	NaN	NaN	NaN
AT1G10522	Q9XIK0	At1g10522	Protein PLASTID REDOX INSENSITIVE 2, chloroplastic	NaN	NaN	NaN	NaN	NaN	NaN	NaN	NaN	1	1	1	13.4	13.4	13.4	20.252	6.2085	999370	623140	376230	NaN	NaN	NaN	NaN	NaN	NaN	NaN	NaN	NaN	NaN	NaN	NaN	NaN	NaN	NaN	-0.756573	NaN	NaN	-0.285977	NaN
AT2G11200	Q9ZQM4		Putative F-box protein At2g11200	NaN	NaN	NaN	NaN	NaN	NaN	NaN	NaN	1	1	1	13.6	13.6	13.6	17.67	2.836	239300	68344	170950	NaN	NaN	NaN	NaN	NaN	NaN	NaN	NaN	NaN	NaN	NaN	NaN	NaN	NaN	NaN	NaN	NaN	NaN	NaN	NaN
AT3G11730	Q9ZRE2	RABD1	Ras-related protein RABD1 (AtRABD1) (Ras-related protein ATFP8)	NaN	NaN	NaN	NaN	NaN	NaN	NaN	NaN	1	1	1	8.3	8.3	8.3	22.724	3.4186	583240	478820	104420	NaN	NaN	NaN	NaN	NaN	NaN	NaN	NaN	NaN	NaN	NaN	NaN	NaN	NaN	NaN	NaN	NaN	NaN	NaN	NaN
AT2G02130	Q9ZUL7	PDF2.3	Defensin-like protein 1 (Low-molecular-weight cysteine-rich protein 68) (Protein LCR68) (Plant defensin 2.3)	NaN	NaN	NaN	NaN	NaN	NaN	NaN	NaN	1	1	1	28.6	28.6	28.6	8.544	4.3751	486240	315680	170550	NaN	NaN	NaN	NaN	NaN	NaN	NaN	NaN	NaN	NaN	NaN	NaN	NaN	NaN	NaN	NaN	-0.160044	NaN	NaN	NaN
AT2G27730	Q9ZUX4		Uncharacterized protein At2g27730, mitochondrial	NaN	NaN	NaN	NaN	NaN	NaN	NaN	NaN	1	1	1	13.3	13.3	13.3	11.947	11.116	2120000	1314300	805700	NaN	NaN	NaN	NaN	NaN	NaN	NaN	NaN	NaN	NaN	NaN	NaN	0.127851	NaN	-1.18229	NaN	NaN	NaN	NaN	NaN
AT2G39020	Q9ZV06		Probable acetyltransferase NATA1-like (EC 2.3.1.-)	NaN	NaN	NaN	NaN	NaN	NaN	NaN	NaN	1	1	1	5.9	5.9	5.9	26.44	2.8206	1887500	1019500	867980	NaN	NaN	NaN	NaN	NaN	NaN	NaN	NaN	NaN	NaN	0.210409	NaN	NaN	NaN	NaN	NaN	NaN	NaN	NaN	NaN
AT3G07390	Q94BT2	AIR12	Auxin-induced in root cultures protein 12	0.109008	0.0617358	-0.139198	-0.155536	0.294272	0.742936	0.165934	0.0824205	2	2	2	6.7	6.7	6.7	25.591	4.3044	56846000	31455000	25391000	-0.204122	-0.0563404	-0.276802	NaN	-0.0848789	NaN	0.021109	-0.142965	-0.119769	-0.315168	0.242549	0.45611	-0.091378	-0.141214	-0.157388	0.333471	0.0822795	0.00298474	0.0285718	0.0977319
AT5G57290	F4KAM0;B3H4N7;Q9LVC9	At5g57290;RPP3B	60S acidic ribosomal protein family;60S acidic ribosomal protein P3-2	-0.0403098	0.05616	0.102375	0.113595	0.751354	0.807426	0.0857765	0.0873684	2	2	2	29.2	29.2	29.2	8.9448	268.59	83305000	45878000	37427000	0.162235	0.210769	-0.00109378	0.0889319	0.107132	0.170642	0.0669973	0.0734135	0.0535106	0.147311	0.180087	0.245711	NaN	NaN	-0.257318	0.204681	0.099344	-0.216041	-0.186368	-0.103165
AT2G23670	O64835	YCF37	At2g23670/F26B6.32 (Expressed protein) (Homolog of Synechocystis YCF37) (YCF37-like protein)	-0.717378	-0.0184161	-0.097922	-0.125924	0.0935771	0.884351	0.316792	0.0899894	2	2	2	6.6	6.6	6.6	17.078	36.038	56381000	32768000	23614000	-0.208036	-0.198818	-0.109839	0.0408525	-0.153777	-0.211879	-0.032064	-0.234333	-0.182869	0.171535	-0.196356	NaN	0.00601546	0.120963	-0.00428689	-1.58352	-0.148412	-0.142061	-0.971715	-0.741181
AT1G31160	Q8GYJ9	HINT 2	HISTIDINE TRIAD NUCLEOTIDE-BINDING 2	NaN	NaN	NaN	-0.157923	NaN	NaN	NaN	0.102039	2	2	2	17.6	17.6	17.6	20.4	4.1659	3427700	2112700	1315000	-0.078343	-0.212589	NaN	NaN	-0.182837	NaN	NaN	NaN	NaN	NaN	NaN	NaN	NaN	NaN	NaN	NaN	NaN	NaN	NaN	NaN
AT2G35830	B9DGK2;Q9SJ67	At2g35830	AT2G35830 protein (Ureidoglycolate hydrolase);At2g35830/F11F19.26 (Expressed protein) (Ureidoglycolate hydrolase)	-0.112404	0.0129582	0.0672491	0.0907724	0.237896	0.918445	0.254759	0.117108	2	2	1	20.7	20.7	15.2	20.231	30.711	15461000	7921800	7539700	0.109272	0.118062	0.0616315	0.161061	0.00383572	NaN	0.103917	0.0433717	0.0556946	0.0660131	-0.0574685	-0.012074	NaN	0.108417	NaN	NaN	-0.104984	-0.14148	-0.0375009	-0.165651
AT5G05740	F4K0T6;F4K0T7;Q9FFK3	EGY2	Probable zinc metalloprotease EGY2, chloroplastic (EC 3.4.24.-) (Protein ETHYLENE-DEPENDENT GRAVITROPISM-DEFICIENT AND YELLOW-GREEN 2);Ethylene-dependent gravitropism-deficient and yellow-green-like 2	NaN	NaN	NaN	0.186526	NaN	NaN	NaN	0.126448	2	2	2	8.2	8.2	8.2	56.399	8.0528	6184700	3279000	2905700	0.0417532	NaN	NaN	0.188477	0.329347	NaN	NaN	NaN	-0.15527	NaN	NaN	NaN	NaN	NaN	0.0790825	NaN	NaN	-0.179919	-0.0479904	NaN
AT2G21160	P45434;F4IGI4	At2g21160	Translocon-associated protein (TRAP), alpha subunit;Translocon-associated protein subunit alpha (TRAP-alpha) (Signal sequence receptor subunit alpha) (SSR-alpha)	0.00273489	0.0603109	-0.0229027	-0.117266	0.983519	0.737072	0.768994	0.140206	2	2	2	12.4	12.4	12.4	28.167	49.199	25515000	14203000	11312000	0.00203466	-0.127131	-0.297436	-0.154558	-0.00924061	-0.20026	0.0242242	0.0444021	0.141043	-0.123923	NaN	NaN	-0.109675	0.267776	0.0228316	-0.00284855	0.158881	0.127872	-0.145671	-0.124559
ATCG00730	P56774	petD	Cytochrome b6-f complex subunit 4 (17 kDa polypeptide)	-0.0286821	0.182929	-0.00117927	0.172524	0.728614	0.327933	0.990737	0.146049	2	2	2	10.6	10.6	10.6	17.431	53.772	233030000	125000000	108030000	-0.0673592	0.20722	-0.0226872	0.358878	0.386569	-0.306879	0.283837	0.0566591	-0.0412595	0.00174604	NaN	NaN	0.0708357	0.419059	0.0588929	-0.0455936	0.0609504	0.0220296	-0.165534	-0.015263
AT2G38170	F4IS06;Q39253;Q39253-2	CAX1	Vacuolar cation/proton exchanger;Vacuolar cation/proton exchanger 1 (Ca(2+)/H(+) antiporter CAX1) (Ca(2+)/H(+) exchanger 1) (Protein CATION EXCHANGER 1) (Protein RARE COLD INDUCIBLE 4)	NaN	NaN	-0.047685	-0.103589	NaN	NaN	0.810306	0.160392	2	2	2	8.9	8.9	8.9	43.297	21.637	7778400	4061100	3717300	-0.123707	-0.227026	-0.0957284	-0.145795	0.0743134	-0.531626	0.0401071	-0.0600641	0.360843	NaN	NaN	NaN	NaN	NaN	0.199691	-0.0761171	NaN	NaN	0.434829	NaN
AT5G03040	Q93ZH7	iqd2	AT5g03040/F15A17_70 (IQ-domain 2)	NaN	NaN	NaN	-0.140745	NaN	NaN	NaN	0.161797	2	2	2	6.9	6.9	6.9	50.462	3.5917	4190400	2753800	1436700	-0.028232	NaN	-0.164656	-0.229346	NaN	NaN	NaN	NaN	-0.131913	-0.13086	NaN	NaN	NaN	NaN	NaN	NaN	NaN	NaN	NaN	NaN
AT3G01520	Q8LGG8		Universal stress protein A-like protein	NaN	NaN	NaN	-0.111056	NaN	NaN	NaN	0.206953	2	2	2	10.9	10.9	10.9	19.568	5.5221	4056800	2288300	1768500	NaN	NaN	-0.189078	-0.0404743	-0.103617	NaN	NaN	NaN	NaN	NaN	NaN	NaN	NaN	NaN	NaN	NaN	NaN	-0.0781397	-0.247148	NaN
AT1G76100	P11490	PETE	Plastocyanin minor isoform, chloroplastic	-0.125842	-0.207484	-0.20204	-0.136612	0.603142	0.186918	0.101303	0.241296	2	2	2	38	38	38	17.589	189.12	83571000	44993000	38578000	0.0938659	NaN	-0.36624	-0.166417	-0.107656	-0.331857	-0.175174	-0.0990881	NaN	NaN	-0.137081	-0.262576	-0.0171135	-0.413166	NaN	0.117201	-0.765393	-0.200863	-0.0942086	0.314056
AT1G42960	Q9C7S3	F13A11.2	Inner membrane localized protein	0.113294	NaN	-0.125567	0.130399	0.58754	NaN	0.19925	0.277242	2	2	2	20.8	20.8	20.8	17.829	33.069	24217000	12940000	11277000	NaN	0.0695484	0.314799	NaN	0.00684862	NaN	NaN	-0.165722	-0.188138	-0.0228424	-0.0571596	NaN	NaN	NaN	NaN	-0.486398	0.227107	0.135355	0.369463	0.320942
AT3G10860;AT5G05370	Q9SG91;Q9FLB7	T7M13.6;At5g05370	At3g10860 (Cytochrome b-c1 complex, subunit 8 protein) (Putative ubiquinol-cytochrome C reductase complex ubiquinone-binding protein (QP-C));"At5g05370 (Cytochrome b-c1 complex, subunit 8 protein) (Ubiquinol-cytochrome C reductase complex ubiquinone-binding protein)"	NaN	-0.157448	NaN	-0.0863368	NaN	0.476059	NaN	0.343728	2	2	2	26.4	26.4	26.4	8.5049	5.3347	10743000	6504800	4238700	NaN	NaN	0.0119593	-0.0965518	-0.174418	NaN	NaN	NaN	NaN	NaN	0.128532	NaN	-0.218074	0.0617723	-0.602022	NaN	NaN	NaN	-0.96909	-1.30492
AT5G08050	Q9SD79	F13G24.250	Wiskott-aldrich syndrome family protein, putative (DUF1118)	-0.0580975	NaN	NaN	0.09648	0.453538	NaN	NaN	0.457329	2	2	2	12	12	12	16.58	4.9337	86496000	48265000	38231000	0.137151	-0.147012	NaN	0.0141389	0.381642	NaN	NaN	NaN	-0.205033	-0.319603	NaN	NaN	-0.158642	NaN	0.0049448	0.0544846	-0.0424455	-0.0739057	-0.0836627	-0.144958
AT4G27320	Q8L4N1-2;Q8L4N1	PHOS34	Universal stress protein PHOS34 (Phosphorylated protein of 34 kDa) (AtPHOS34)	NaN	NaN	NaN	-0.0864548	NaN	NaN	NaN	0.464063	2	2	2	9.3	9.3	9.3	27.919	3.1391	6468100	3440300	3027800	NaN	-0.0328525	0.047527	NaN	-0.274039	-0.157768	NaN	NaN	NaN	NaN	NaN	NaN	0.0617521	-0.157777	NaN	0.146846	-0.413275	NaN	NaN	NaN
AT1G15250;AT1G52300;AT3G16080	Q8LFH7;Q8LEM8;Q43292	RPL37A;RPL37C;RPL37B	60S ribosomal protein L37-1;60S ribosomal protein L37-2;60S ribosomal protein L37-3	0.159958	NaN	-0.0802649	-0.0629189	0.374208	NaN	0.459012	0.564693	2	2	2	17.9	17.9	17.9	10.816	4.6665	65679000	34587000	31092000	NaN	NaN	0.0628413	-0.224671	-0.0269271	-0.300255	-0.0878393	-0.0663532	0.133388	NaN	0.163366	NaN	NaN	NaN	NaN	0.0899173	-0.23981	0.0608181	0.427149	0.461714
AT2G30390	F4IMT3;O04921	FC2	Ferrochelatase-2, chloroplastic (AtFC2) (EC 4.99.1.1) (Ferrochelatase-II) (AtFC-II) (Heme synthase 2) (Protoheme ferro-lyase 2);Ferrochelatase (EC 4.99.1.1)	0.218498	NaN	NaN	0.0314246	0.114105	NaN	NaN	0.584001	2	2	2	6.3	6.3	6.3	57.859	8.9431	11435000	6277900	5157500	0.0415405	0.0228646	-0.000886291	NaN	0.0621796	NaN	NaN	0.117865	-0.00871488	NaN	NaN	NaN	NaN	0.0761186	0.0525191	0.247606	0.229413	NaN	0.178476	NaN
AT1G10940;AT1G60940;AT2G23030;AT3G50500;AT4G33950;AT5G63650;AT5G66880	F4I7B6;Q9C958;P43291;B3H6F9;F4J0N1;Q940H6-2;O64812;Q9FFP9;Q39193;Q940H6;Q39192	At1g10940;SRK2B;SRK2A;OST1;SNRK2.2;SRK2E;SRK2J;SRK2H;SRK2I;SRK2D	Protein kinase superfamily protein;Serine/threonine-protein kinase SRK2A (EC 2.7.11.1) (Arabidopsis protein SK1) (OST1-kinase-like 7) (SNF1-related kinase 2.4) (SnRK2.4);Serine/threonine-protein kinase SRK2B (EC 2.7.11.1) (OST1-kinase-like 6) (SNF1-related kinase 2.10) (SnRK2.10);Serine/threonine-protein kinase SRK2D (EC 2.7.11.1) (OST1-kinase-like 3) (Protein ATHPROKIN A) (SNF1-related kinase 2.…	NaN	0.0637123	0.0547734	0.0259404	NaN	0.501962	0.379369	0.603202	2	2	1	7.8	7.8	3.5	42.147	48.246	13434000	7509000	5925400	0.0155261	0.0588244	0.0558394	0.0446856	-0.0451736	0.207908	-0.0141082	0.0309662	0.0371177	0.0119835	0.160182	NaN	0.00160652	0.0637831	0.0292777	NaN	NaN	NaN	-0.00513732	0.280536
AT2G36620;AT3G53020	P38666;Q42347	RPL24B;RPL24A	60S ribosomal protein L24-1;60S ribosomal protein L24-2 (Protein SHORT VALVE 1)	0.0958545	-0.167888	0.0453915	-0.0797004	0.72247	0.530251	0.657392	0.621167	2	2	2	14.7	14.7	14.7	18.632	116.31	109650000	57228000	52424000	-0.581071	0.115961	0.17336	0.0909372	-0.197689	-0.27488	0.161687	0.157897	0.0307904	0.151463	0.0393861	NaN	0.0991248	-0.028341	-0.781722	0.119381	-0.607239	0.0198393	0.597942	0.349349
AT1G60950	P16972	FD2	Ferredoxin-2, chloroplastic (AtFd2)	0.305259	0.11511	0.396809	-0.073186	0.0658148	0.652186	0.248636	0.638	2	2	2	50.7	50.7	50.7	15.539	323.31	623450000	303130000	320310000	-0.0365612	0.0592181	-0.539489	-0.124615	0.275517	0.208998	0.191088	0.118697	1.54543	-0.0801666	0.826256	-0.214934	0.112816	-0.0152348	-0.133355	0.570213	0.268842	0.20127	0.0724419	0.41353
AT1G20340	P42699	PETE2	Plastocyanin major isoform, chloroplastic (DNA-damage-repair/toleration protein DRT112)	-0.125823	-0.161546	0.122598	0.0481708	0.594978	0.227148	0.617196	0.662097	2	2	2	38.9	38.9	38.9	16.984	323.31	1328800000	721380000	607470000	0.0158291	0.179183	-0.290479	0.123349	0.212972	-0.208092	-0.0573495	0.13304	0.952476	-0.207085	-0.0659719	-0.357508	0.0774524	-0.167093	-0.294609	0.117928	-0.761591	-0.14763	-0.122917	0.285096
AT3G26520	Q41963	TIP1-2	2);Aquaporin TIP1-2 (Gamma-tonoplast intrinsic protein 2) (Gamma-TIP2) (Salt stress-induced tonoplast intrinsic protein) (Tonoplast intrinsic protein 1-2) (AtTIP1	-0.15539	0.0767967	0.24302	0.0479105	0.142014	0.804858	0.0601818	0.734275	2	2	2	17	17	17	25.848	118.84	273270000	144050000	129220000	0.471697	-0.184331	-0.0574797	0.142121	-0.132455	0.245963	0.136797	0.212258	0.564857	0.0552264	-0.284746	NaN	0.0851759	0.68399	-0.177233	0.00275737	-0.248465	-0.11887	-0.297758	-0.114612
AT3G23570	Q94JY3	MDB19.5	Alpha/beta-Hydrolases superfamily protein	NaN	-0.0199665	NaN	0.0367884	NaN	0.884351	NaN	0.735045	2	2	2	14.6	14.6	14.6	26.53	10.185	7523800	4169700	3354200	NaN	-0.0871401	NaN	0.197679	-0.000173792	NaN	NaN	NaN	NaN	NaN	-0.0836725	NaN	-0.071676	NaN	0.0954491	NaN	NaN	NaN	0.239303	NaN
ATCG00560	P60129	psbL	Photosystem II reaction center protein L (PSII-L)	-1.12124	-0.583447	0.0566702	-0.0443987	0.362928	0.423083	0.779546	0.740602	2	2	2	97.4	97.4	97.4	4.4701	323.31	69452000	39945000	29507000	-0.201074	NaN	NaN	0.185531	-0.117653	-0.442738	0.344817	-0.335987	0.361891	0.355368	-2.13639	NaN	-0.239391	0.544181	-0.502189	-1.56398	0.0808533	0.699587	NaN	-3.70142
AT1G79040	P27202	PSBR	Photosystem II 10 kDa polypeptide, chloroplastic	0.152179	0.337998	0.0773392	-0.036111	0.302586	0.237883	0.250472	0.799804	2	2	2	27.9	27.9	27.9	14.586	323.31	767770000	394870000	372900000	0.120069	-0.08564	-0.480958	0.142397	0.123577	-0.0733795	0.181522	0.0602463	0.107197	0.11111	0.229807	1.07995	-0.0165713	0.355751	0.0410542	0.133593	0.446511	0.291324	-0.053188	-0.0573457
AT4G12720	F4JRE7;Q9SU14	NUDT7	MutT/nudix family protein;Nudix hydrolase 7 (AtNUDT7) (EC 3.6.1.-) (ADP-ribose pyrophosphatase) (EC 3.6.1.13) (NADH pyrophosphatase) (EC 3.6.1.22) (Protein GROWTH FACTOR GENE 1)	NaN	NaN	NaN	-0.006579	NaN	NaN	NaN	0.97264	2	2	2	11.5	11.5	11.5	36.51	7.1319	2534800	1495000	1039800	0.186408	-0.390265	0.18412	NaN	NaN	NaN	NaN	0.352045	0.0185834	NaN	NaN	NaN	NaN	0.090396	NaN	NaN	NaN	NaN	NaN	NaN
AT1G12010	O65378		1-aminocyclopropane-1-carboxylate oxidase 3 (ACC oxidase 3) (AtACO3) (EC 1.14.17.4)	-0.10887	-0.106962	-0.114602	NaN	0.39224	0.455556	0.0578647	NaN	2	1	1	7.5	5	5	36.531	8.1343	19201000	10944000	8257500	-0.108804	-0.147029	NaN	NaN	NaN	-0.103329	-0.13732	-0.172849	-0.048398	-0.111116	-0.194392	NaN	0.0461385	NaN	-0.172631	NaN	NaN	-0.0385113	-0.221698	-0.0664019
AT2G18040	Q9SL42	PIN1	Peptidyl-prolyl cis-trans isomerase Pin1 (PPIase Pin1) (EC 5.2.1.8) (PIN1At) (Rotamase Pin1)	NaN	-0.166393	0.176571	NaN	NaN	0.427912	0.0939272	NaN	2	2	2	22.7	22.7	22.7	13.015	7.3317	14128000	7515700	6612800	NaN	NaN	NaN	0.212754	0.217	NaN	0.0460277	0.137972	0.353986	0.168299	NaN	NaN	-0.130171	0.0729896	-0.441997	NaN	NaN	NaN	NaN	0.593492
AT4G34700	Q945M1	CIB22	NADH dehydrogenase [ubiquinone] 1 beta subcomplex subunit 9 (B22 subunit of eukaryotic mitochondrial complex I) (Complex I-B22) (AtCIB22) (CI-B22) (NADH-ubiquinone oxidoreductase B22 subunit)	-0.426642	NaN	-0.186872	NaN	0.103568	NaN	0.0954433	NaN	2	2	2	26.5	26.5	26.5	13.616	7.6233	14489000	9078500	5410100	NaN	NaN	-0.250705	NaN	NaN	NaN	-0.28402	-0.174567	NaN	-0.102028	0.0895694	NaN	NaN	0.0904866	NaN	-0.720053	-0.490602	NaN	0.0324835	-0.528396
AT2G05620	Q9SL05	PGR5	Protein PROTON GRADIENT REGULATION 5, chloroplastic	-0.89905	NaN	0.178803	NaN	0.171408	NaN	0.0955494	NaN	2	2	2	18.8	18.8	18.8	14.293	11.524	32016000	18511000	13505000	NaN	NaN	NaN	NaN	NaN	-0.00839698	0.181606	0.430726	0.0781745	0.211905	0.675802	NaN	NaN	-0.0724766	NaN	-1.38466	-0.71537	0.560846	-0.681045	-2.27502
AT2G01350	F4INA0;A8MS71;A8MRX1;Q9ZU32	QPT	Nicotinate-nucleotide pyrophosphorylase [carboxylating], chloroplastic (EC 2.4.2.19) (Quinolinate phosphoribosyltransferase [decarboxylating]);Nicotinate-nucleotide pyrophosphorylase [carboxylating] (EC 2.4.2.19) (Quinolinate phosphoribosyltransferase [decarboxylating]);Quinolinate phoshoribosyltransferase	NaN	NaN	0.206236	NaN	NaN	NaN	0.0955494	NaN	2	2	2	12.5	12.5	12.5	30.845	6.3008	6315100	3162100	3153000	0.198231	NaN	NaN	NaN	0.128832	0.138119	NaN	NaN	0.341676	0.138913	NaN	NaN	NaN	NaN	NaN	NaN	-0.123417	0.341037	NaN	NaN
AT5G36160	Q9LVY1	TAT	Tyrosine aminotransferase (TAT) (EC 2.6.1.5) (L-tyrosine:2-oxoglutarate aminotransferase)	0.0578762	NaN	-0.143552	NaN	0.757287	NaN	0.121172	NaN	2	2	2	6.7	6.7	6.7	46.449	11.365	7024300	4112800	2911500	-0.00535178	-0.105182	NaN	NaN	NaN	NaN	NaN	-0.191045	-0.093094	-0.146517	-0.147657	NaN	NaN	NaN	-0.0255412	-0.0854724	-0.255767	-0.0534497	0.173841	0.510229
AT3G02020;AT5G13280;AT5G14060	O23653;Q9S702;Q9LYU8	AK2;AK3;AK1	Aspartokinase 1, chloroplastic (EC 2.7.2.4) (Aspartate kinase 1);"Aspartokinase 2, chloroplastic (EC 2.7.2.4) (Aspartate kinase 2)";"Aspartokinase 3, chloroplastic (EC 2.7.2.4) (Aspartate kinase 3)"	NaN	NaN	-0.129593	NaN	NaN	NaN	0.183378	NaN	2	2	2	4.8	4.8	4.8	59.604	3.728	2185600	1215700	969880	NaN	NaN	NaN	NaN	NaN	NaN	-0.103933	-0.0897695	-0.00649258	-0.318178	NaN	NaN	NaN	NaN	NaN	NaN	NaN	NaN	NaN	NaN
AT4G04910	Q9M0Y8	NSF	Vesicle-fusing ATPase (EC 3.6.4.6) (N-ethylmaleimide-sensitive fusion protein) (Vesicular-fusion protein NSF)	NaN	NaN	0.106745	NaN	NaN	NaN	0.222996	NaN	2	2	2	4.4	4.4	4.4	81.486	4.1739	2278700	1138600	1140100	NaN	NaN	NaN	NaN	NaN	0.151499	0.209587	-0.0554757	0.121368	NaN	NaN	NaN	NaN	0.545766	NaN	NaN	NaN	NaN	NaN	NaN
AT2G36830	P25818	TIP1-1	Aquaporin TIP1-1 (Aquaporin TIP) (Gamma-tonoplast intrinsic protein) (Gamma-TIP) (Tonoplast intrinsic protein 1-1) (AtTIP1;1) (Tonoplast intrinsic protein, root-specific RB7)	-0.0334794	NaN	0.184163	NaN	0.77225	NaN	0.228849	NaN	2	2	2	16.7	16.7	16.7	25.619	8.9257	66523000	35832000	30691000	0.0583743	NaN	NaN	NaN	NaN	0.0180171	0.419463	NaN	0.11501	NaN	NaN	NaN	NaN	NaN	NaN	-0.209108	NaN	0.0140799	-0.0277328	0.0888435
AT4G34980	O49607	SBT1.6	Subtilisin-like protease SBT1.6 (EC 3.4.21.-) (Subtilase subfamily 1 member 6) (AtSBT1.6) (Subtilisin-like serine protease 2) (At-SLP2)	NaN	NaN	0.28427	NaN	NaN	NaN	0.337354	NaN	2	2	2	4.1	4.1	4.1	81.045	5.291	3162500	1545400	1617100	NaN	NaN	NaN	-0.0821169	-0.148585	0.0898844	NaN	NaN	0.832174	-0.0692476	NaN	NaN	NaN	NaN	NaN	NaN	NaN	NaN	NaN	NaN
ATCG00330	P56804	rps14	30S ribosomal protein S14, chloroplastic	-0.287299	NaN	0.133237	NaN	0.400513	NaN	0.393046	NaN	2	2	2	23	23	23	11.785	16.496	29218000	14958000	14260000	NaN	NaN	NaN	NaN	0.193255	0.173436	0.357103	-0.125845	-0.217228	0.478717	-0.342274	NaN	NaN	NaN	NaN	0.375174	-1.20191	-0.0478233	-0.260452	-0.301482
AT5G47930	Q8L953	RPS27D	40S ribosomal protein S27-3	0.0440099	NaN	-0.027945	NaN	0.603142	NaN	0.723865	NaN	2	1	1	35.7	20.2	20.2	9.49	3.4104	31271000	16833000	14439000	NaN	NaN	NaN	NaN	-0.0205843	-0.0993446	NaN	0.00318325	0.0123265	NaN	-0.103204	NaN	NaN	NaN	NaN	0.0735402	NaN	0.00155484	0.00788379	0.0930606
AT3G46430;AT5G59613	Q9SN96	F18L15.150	AT3g46430/F18L15_150 (ATP synthase)	-0.241209	-0.190559	0.0116019	NaN	0.527394	0.455556	0.879451	NaN	2	2	2	38.2	38.2	38.2	6.5846	4.5302	17709000	9870100	7839000	NaN	NaN	-0.112139	NaN	-0.313731	-0.000173166	NaN	-0.03743	0.072409	NaN	0.201974	NaN	-0.448391	NaN	-0.32526	NaN	0.0525656	0.117652	NaN	-0.893844
AT2G40765	Q94K78	At2g40765	Transmembrane protein (Ubiquinol--cytochrome-c reductase)	-0.189725	-0.320982	NaN	NaN	0.247395	0.0595994	NaN	NaN	2	2	2	42.1	42.1	42.1	5.9759	12.277	12351000	7363000	4988100	NaN	NaN	NaN	NaN	NaN	NaN	NaN	-0.266832	NaN	NaN	-0.385442	NaN	-0.38457	-0.174359	-0.339555	NaN	-0.158359	-0.0532617	-0.357555	NaN
AT1G33600	Q9FW48	T1E4.2	Leucine-rich repeat (LRR) family protein	NaN	-0.502582	NaN	NaN	NaN	0.0713312	NaN	NaN	2	2	2	5.9	5.9	5.9	52.47	3.6889	4842600	2866900	1975700	NaN	-0.790544	NaN	-0.637134	NaN	NaN	NaN	NaN	NaN	NaN	-0.788252	NaN	-0.690719	-0.204793	-0.326563	NaN	NaN	NaN	NaN	NaN
AT2G24280	Q93Z34	At2g24280	Alpha/beta-Hydrolases superfamily protein (At2g24280/F27D4.19)	NaN	0.360343	NaN	NaN	NaN	0.0729355	NaN	NaN	2	2	2	7.9	7.9	7.9	56.232	9.3911	4149500	2170000	1979500	NaN	0.397429	NaN	NaN	0.620915	NaN	NaN	NaN	NaN	NaN	NaN	NaN	0.432513	0.239673	0.408843	NaN	NaN	NaN	NaN	NaN
AT5G42100	F4K020;Q9FHX5-2;Q9FHX5	BG_PPAP	Beta-1,3-glucanase;"Glucan endo-1,3-beta-glucosidase 10 (EC 3.2.1.39) ((1->3)-beta-glucan endohydrolase 10) ((1->3)-beta-glucanase 10) (Beta-1,3-endoglucanase 10) (Beta-1,3-glucanase 10) (Putative plasmodesmal associated protein) (AtBG_ppap)"	-0.357336	-0.480292	NaN	NaN	0.0640766	0.131685	NaN	NaN	2	2	2	5.2	5.2	5.2	45.063	32.561	7831000	4733000	3097900	NaN	NaN	NaN	NaN	NaN	NaN	NaN	NaN	NaN	NaN	-0.116749	NaN	NaN	-0.597377	-0.726749	-0.298142	NaN	-0.135771	-0.489616	-0.505816
AT1G32080	Q9FVQ4	PLGG1	Plastidal glycolate/glycerate translocator 1, chloroplastic (Bacterial membrane protein LrgB-like protein) (AtLrgB)	0.112483	0.234427	NaN	NaN	0.313612	0.186918	NaN	NaN	2	2	2	5.3	5.3	5.3	54.016	45.006	15624000	8135600	7488800	-0.00944489	NaN	0.173728	NaN	NaN	NaN	NaN	-0.101745	0.260158	NaN	NaN	NaN	0.0701979	0.347991	0.285093	NaN	0.011566	0.0471016	0.124032	0.267232
AT3G56310	Q8VXZ7-2;Q8VXZ7	AGAL3	Alpha-galactosidase 3 (AtAGAL3) (EC 3.2.1.22) (Alpha-D-galactoside galactohydrolase 3) (Melibiase)	NaN	0.646165	NaN	NaN	NaN	0.209942	NaN	NaN	2	2	2	8.2	8.2	8.2	45.637	32.144	2929500	1541400	1388100	NaN	NaN	NaN	NaN	NaN	NaN	NaN	NaN	NaN	NaN	-0.0613181	NaN	NaN	1.19467	0.805143	NaN	NaN	NaN	NaN	0.20816
AT1G03870	Q9ZWA8	FLA9	Fasciclin-like arabinogalactan protein 9	NaN	0.242705	NaN	NaN	NaN	0.209942	NaN	NaN	2	1	1	9.7	6.1	6.1	26.115	8.0787	14972000	7745100	7227200	NaN	NaN	NaN	NaN	0.332387	NaN	NaN	NaN	NaN	NaN	0.307025	NaN	NaN	0.383667	0.037424	NaN	NaN	0.200267	NaN	NaN
AT5G17230	F4KGX7;P37271	PSY;PSY1	Phytoene synthase, chloroplastic (EC 2.5.1.32);PHYTOENE SYNTHASE	NaN	0.137299	NaN	NaN	NaN	0.290292	NaN	NaN	2	2	2	8.9	8.9	8.9	49.222	13.919	2728300	1674700	1053700	NaN	NaN	NaN	NaN	NaN	NaN	NaN	NaN	NaN	NaN	NaN	NaN	0.199361	0.12376	0.0887752	NaN	NaN	NaN	NaN	NaN
AT1G33810	Q8L9M8		Zinc finger/BTB domain protein	NaN	0.1996	NaN	NaN	NaN	0.299799	NaN	NaN	2	2	2	18.1	18.1	18.1	15.698	8.8492	13137000	6683900	6452900	NaN	NaN	0.447823	NaN	0.460802	NaN	NaN	NaN	0.308083	0.310124	0.443049	NaN	0.0712183	NaN	0.084533	NaN	NaN	0.0937091	NaN	NaN
AT5G16010	Q9LFS3	F1N13_150	3-oxo-5-alpha-steroid 4-dehydrogenase family protein (AT5g16010/F1N13_150) (Steroid 5alpha-reductase-like protein)	-0.631213	0.141895	NaN	NaN	0.240594	0.384202	NaN	NaN	2	2	2	7.1	7.1	7.1	30.126	3.3177	5961900	3337700	2624200	-0.431559	NaN	-0.0535612	NaN	NaN	NaN	NaN	NaN	NaN	NaN	0.395068	NaN	-0.0822731	0.214403	0.0403804	NaN	NaN	0.147162	-1.25987	-0.780932
AT2G35810	Q8VZP3	At2g35810	Ureidoglycolate hydrolase	NaN	0.342344	NaN	NaN	NaN	0.412961	NaN	NaN	2	1	1	19.1	14.1	14.1	22.028	12.563	4318300	2406800	1911600	NaN	NaN	NaN	NaN	NaN	NaN	NaN	NaN	NaN	NaN	-0.0529617	NaN	NaN	0.0786023	1.00139	NaN	NaN	NaN	NaN	0.319481
AT4G38680	Q41188;Q41188-2	CSP2	Cold shock protein 2 (AtCSP2) (Cold shock domain-containing protein 2) (Glycine-rich protein 2) (AtGRP2)	0.266945	-0.349989	NaN	NaN	0.203056	0.455556	NaN	NaN	2	2	2	21.2	21.2	21.2	19.153	138.55	22241000	11838000	10403000	NaN	NaN	NaN	NaN	NaN	NaN	NaN	NaN	NaN	NaN	0.126252	-0.17796	-1.44224	0.093993	NaN	NaN	NaN	0.07589	0.206785	0.518159
AT3G52730	Q9LXJ2	F3C22_130	Ubiquinol--cytochrome-c reductase-like protein (Ubiquinol-cytochrome C reductase UQCRX/QCR9-like family protein)	-0.257642	-0.150811	NaN	NaN	0.294272	0.45582	NaN	NaN	2	2	2	20.8	20.8	20.8	8.4485	28.038	11762000	7456800	4305000	NaN	NaN	NaN	NaN	NaN	NaN	NaN	NaN	NaN	NaN	-0.340582	NaN	0.136773	-0.248623	NaN	NaN	-0.0667306	NaN	-0.095015	-0.611179
AT3G13720	Q9LIC6	PRA1F3	PRA1 family protein F3 (AtPRA1.F3) (Prenylated Rab acceptor 8)	NaN	-0.00791872	NaN	NaN	NaN	0.947598	NaN	NaN	2	2	2	22.9	22.9	22.9	21.116	41.576	4676600	2564700	2111900	-0.183737	0.0256284	NaN	NaN	NaN	NaN	NaN	NaN	NaN	NaN	NaN	NaN	-0.0798642	0.0591484	-0.00304037	NaN	NaN	NaN	NaN	NaN
AT3G44100	Q9LXQ2	F26G5_50	At3g44100 (MD-2-related lipid recognition domain-containing protein)	-0.0347639	-0.0121926	NaN	NaN	0.647121	0.959811	NaN	NaN	2	2	2	18.4	18.4	18.4	16.07	6.8144	27798000	15613000	12184000	NaN	NaN	NaN	NaN	-0.00885586	NaN	NaN	NaN	NaN	NaN	-0.270074	0.333319	-0.0998228	NaN	NaN	-0.0595682	0.00954747	-0.0481977	-0.131457	0.0558558
AT4G23630;AT5G41600	Q9SUR3;Q9FFS0	RTNLB1;RTNLB4	Reticulon-like protein B1 (AtRTNLB1) (VirB2-interacting protein 1);Reticulon-like protein B4 (AtRTNLB4) (VirB2-interacting protein 3)	-0.347853	NaN	NaN	NaN	0.0674	NaN	NaN	NaN	2	2	2	5.5	5.5	5.5	30.528	2.5522	10738000	6311600	4426000	NaN	NaN	NaN	NaN	NaN	NaN	NaN	NaN	NaN	NaN	NaN	NaN	NaN	NaN	NaN	-0.251234	-0.462027	NaN	NaN	-0.330297
AT3G02540;AT5G38470	F4JD57;Q84L31-2;Q84L31;F4JD59;Q84L30-2	RAD23C;RAD23D	Rad23 UV excision repair protein family;Ubiquitin receptor RAD23c (AtRAD23c) (Putative DNA repair protein RAD23-3) (RAD23-like protein 3) (AtRAD23-3);Ubiquitin receptor RAD23d (AtRAD23d) (Putative DNA repair protein RAD23-4) (RAD23-like protein 4) (AtRAD23-4)	0.549734	NaN	NaN	NaN	0.0728301	NaN	NaN	NaN	2	1	1	5.7	3.6	3.6	44.159	40.704	2839500	1443000	1396500	NaN	NaN	NaN	NaN	NaN	NaN	NaN	NaN	NaN	NaN	NaN	NaN	NaN	NaN	NaN	NaN	0.259848	0.340127	1.03503	0.563933
ATCG01010	P56752	ndhF	NAD(P)H-quinone oxidoreductase subunit 5, chloroplastic (EC 1.6.5.-) (NAD(P)H dehydrogenase subunit 5) (NADH-plastoquinone oxidoreductase subunit 5)	0.329745	NaN	NaN	NaN	0.0830947	NaN	NaN	NaN	2	2	2	3.1	3.1	3.1	85.237	9.5243	5075900	2513800	2562100	NaN	NaN	NaN	NaN	0.408078	NaN	NaN	NaN	NaN	NaN	NaN	NaN	NaN	NaN	NaN	0.228756	NaN	0.468451	0.292028	NaN
AT1G52740;AT2G38810;AT3G54560;AT4G13570	Q9C944;F4JT33;Q9T0H7;Q9SII0;O23628	HTA4;H2AV	Histone H2A;Histone H2A variant 1 (H2A.F/Z 1) (H2AvAt) (HTA11);Histone H2A.8 (H2A-4) (HTA4);Probable histone H2A variant 2 (H2A.F/Z 2) (HTA8);Probable histone H2A variant 3 (H2A.F/Z 3) (HTA9)	0.270273	NaN	NaN	NaN	0.10309	NaN	NaN	NaN	2	1	1	14.2	7.5	7.5	14.271	3.2979	7085900	3969200	3116700	NaN	NaN	NaN	NaN	NaN	NaN	NaN	NaN	NaN	NaN	NaN	NaN	NaN	NaN	NaN	NaN	0.421939	0.0208131	0.337294	0.301044
AT3G24590	Q8H0W1	PLSP1	Chloroplast processing peptidase (EC 3.4.21.89) (Signal peptidase I-3)	0.195299	NaN	NaN	NaN	0.140052	NaN	NaN	NaN	2	2	2	13.7	13.7	13.7	32.554	12.699	4141800	2172900	1969000	NaN	NaN	NaN	NaN	NaN	NaN	NaN	-0.143571	NaN	NaN	NaN	NaN	NaN	NaN	NaN	NaN	0.146018	0.0768268	0.177895	0.380455
AT1G30410;AT1G30420;AT2G34660	Q9C8H1;Q9C8H0;Q42093	ABCC11;ABCC12;ABCC2	ABC transporter C family member 11 (ABC transporter ABCC.11) (AtABCC11) (EC 3.6.3.44) (ATP-energized glutathione S-conjugate pump 12) (Glutathione S-conjugate-transporting ATPase 12) (Multidrug resistance-associated protein 12);ABC transporter C family member 12 (ABC transporter ABCC.12) (AtABCC12) (EC 3.6.3.44) (ATP-energized glutathione S-conjugate pump 13) (Glutathione S-conjugate-transporting…	0.241559	NaN	NaN	NaN	0.146636	NaN	NaN	NaN	2	2	1	1.6	1.6	1.1	168.1	3.6764	45782000	22521000	23262000	NaN	NaN	NaN	NaN	NaN	NaN	NaN	NaN	NaN	NaN	NaN	NaN	NaN	NaN	NaN	NaN	0.138778	NaN	0.392251	0.193648
AT3G26420	Q9LIN3	RZ1A	Glycine-rich RNA-binding protein RZ1A (AtRZ-1a)	0.162183	NaN	NaN	NaN	0.146808	NaN	NaN	NaN	2	2	2	9.4	9.4	9.4	26.923	4.2314	5538600	2963700	2574900	NaN	NaN	NaN	NaN	NaN	NaN	NaN	NaN	NaN	NaN	NaN	NaN	NaN	NaN	NaN	0.263646	0.122103	-0.0536034	0.261218	0.21755
AT1G51060;AT4G27230;AT5G54640	Q9LD28;O81826;Q9C681	RAT5	Histone H2A.6 (HTA1) (Protein RESISTANT TO AGROBACTERIUM TRANSFORMATION 5);Probable histone H2A.1 (HTA10);Probable histone H2A.3 (HTA2)	-0.373648	NaN	NaN	NaN	0.164186	NaN	NaN	NaN	2	1	1	24.6	17.7	17.7	13.658	51.468	21567000	13613000	7954000	NaN	NaN	NaN	NaN	NaN	NaN	NaN	NaN	NaN	NaN	NaN	NaN	NaN	NaN	NaN	-0.236173	-0.0115793	-0.10712	-0.477829	-1.03554
AT5G14030	Q94BY3	At5g14030	Translocon-associated protein subunit beta (TRAP-beta) (Signal sequence receptor subunit beta)	-0.171497	NaN	NaN	NaN	0.195851	NaN	NaN	NaN	2	2	2	20.5	20.5	20.5	21.104	23.888	17884000	11209000	6675100	NaN	NaN	NaN	NaN	NaN	NaN	NaN	NaN	-0.453846	NaN	0.717422	NaN	1.03624	NaN	NaN	0.0434151	-0.303943	-0.359506	-0.230932	-0.00652128
AT2G22125	F4IIM1	At2g22125	Protein CELLULOSE SYNTHASE INTERACTIVE 1 (Protein POM-POM 2)	0.181014	NaN	NaN	NaN	0.215586	NaN	NaN	NaN	2	2	2	1.5	1.5	1.5	230.7	8.4765	4490300	2701700	1788600	NaN	NaN	NaN	NaN	NaN	NaN	NaN	NaN	NaN	0.814243	NaN	NaN	NaN	NaN	NaN	NaN	-0.0711632	0.217926	0.270094	0.3072
AT5G22640	Q8LPR8;F4K9Z1	TIC100;emb1211	MORN (Membrane Occupation and Recognition Nexus) repeat-containing protein;Protein TIC 100 (Protein EMBRYO DEFECTIVE 1211) (Translocon at the inner envelope membrane of chloroplasts 100) (AtTIC100)	0.137588	NaN	NaN	NaN	0.280813	NaN	NaN	NaN	2	2	2	4.5	4.5	4.5	99.953	3.3624	8213300	4542100	3671100	NaN	NaN	NaN	NaN	NaN	NaN	-0.267863	NaN	NaN	NaN	NaN	NaN	NaN	NaN	NaN	0.0875314	0.0636889	-0.00307333	0.448551	0.0912419
AT4G19006;AT5G45620	Q8RWF0;Q8GYA6;F4KEK8	RPN9A;RPN9B;At5g45620	26S proteasome non-ATPase regulatory subunit 13 homolog A (26S proteasome regulatory subunit RPN9a) (AtRNP9a) (26S proteasome regulatory subunit S11 homolog A);26S proteasome non-ATPase regulatory subunit 13 homolog B (26S proteasome regulatory subunit RPN9b) (AtRNP9b) (26S proteasome regulatory subunit S11 homolog B);Proteasome component (PCI) domain protein	-0.140168	NaN	NaN	NaN	0.305552	NaN	NaN	NaN	2	2	2	7.8	7.8	7.8	44.167	14.519	4162300	2448800	1713500	NaN	NaN	NaN	NaN	NaN	NaN	NaN	NaN	NaN	NaN	NaN	NaN	NaN	-0.107152	NaN	NaN	-0.259357	-0.0493555	-0.111791	NaN
AT5G54900	Q9FPJ8	RBP45A	Polyadenylate-binding protein RBP45A (Poly(A)-binding protein RBP45A) (RNA-binding protein 45A) (AtRBP45A)	0.34776	NaN	NaN	NaN	0.318324	NaN	NaN	NaN	2	2	2	5.7	5.7	5.7	42.323	7.203	3965200	2063600	1901600	NaN	NaN	NaN	NaN	NaN	NaN	NaN	NaN	NaN	NaN	NaN	NaN	NaN	NaN	NaN	-0.0789029	0.176137	-0.235135	1.13891	0.737791
AT1G26880;AT1G69620	Q9FE65;Q42351;A8MR50	RPL34B;RPL34A;At1g26880	60S ribosomal protein L34-1;60S ribosomal protein L34-2;Ribosomal protein L34e superfamily protein	0.205778	NaN	NaN	NaN	0.334421	NaN	NaN	NaN	2	2	1	16.8	16.8	10.1	13.65	18.093	108660000	54408000	54257000	NaN	NaN	NaN	NaN	NaN	-0.0785385	0.05071	NaN	NaN	NaN	0.00710723	NaN	0.0192939	NaN	NaN	0.188269	-0.329605	0.15237	0.572824	0.445032
AT2G01470	Q39221	STL2P	SEC12-like protein 2	-0.168748	NaN	NaN	NaN	0.343177	NaN	NaN	NaN	2	2	2	7.1	7.1	7.1	42.793	2.9743	2941400	1683200	1258200	NaN	NaN	NaN	NaN	NaN	NaN	NaN	NaN	NaN	NaN	NaN	NaN	NaN	NaN	NaN	-0.057979	-0.481924	-0.238724	0.103635	NaN
AT1G08640	Q93WG3	CJD1	Chloroplast J-like domain 1	0.217623	NaN	NaN	NaN	0.362201	NaN	NaN	NaN	2	2	2	6.8	6.8	6.8	32.902	5.5313	10117000	7879800	2237500	NaN	NaN	NaN	NaN	NaN	NaN	NaN	NaN	NaN	NaN	NaN	NaN	NaN	NaN	NaN	-0.143805	NaN	NaN	0.402995	0.39368
AT1G52220	Q9M812;Q9M812-3;Q9M812-2	CURT1C	Protein CURVATURE THYLAKOID 1C, chloroplastic	0.0878978	NaN	NaN	NaN	0.374208	NaN	NaN	NaN	2	2	2	20.5	20.5	20.5	16.945	155.83	19094000	10264000	8829800	NaN	NaN	NaN	NaN	NaN	NaN	NaN	NaN	NaN	NaN	NaN	NaN	0.109219	NaN	-0.00629187	0.0836702	-0.0740867	0.0760461	0.0681493	0.28571
AT2G47400	O22914	CP12-1	Calvin cycle protein CP12-1, chloroplastic (CP12 domain-containing protein 1) (Chloroplast protein 12-1)	-0.429789	NaN	NaN	NaN	0.411433	NaN	NaN	NaN	2	2	2	41.1	41.1	41.1	13.487	323.31	44573000	25809000	18764000	NaN	NaN	NaN	NaN	NaN	-0.353069	NaN	NaN	NaN	NaN	0.301281	NaN	NaN	-0.694409	NaN	NaN	-1.27599	-0.985382	0.128541	0.413674
ATCG00520	P56788	ycf4	Photosystem I assembly protein Ycf4	0.211183	NaN	NaN	NaN	0.424568	NaN	NaN	NaN	2	2	2	9.8	9.8	9.8	21.407	3.3135	27486000	16614000	10872000	NaN	NaN	NaN	NaN	NaN	NaN	NaN	NaN	NaN	NaN	NaN	NaN	NaN	0.571019	NaN	NaN	0.065117	-0.0728318	0.807715	0.0447336
AT3G52230	Q9SUY2	F4F15.340	AT3g52230/F4F15_340	0.133284	NaN	NaN	NaN	0.502458	NaN	NaN	NaN	2	2	2	20	20	20	16.124	33.574	12805000	6771200	6033700	NaN	-0.315062	NaN	NaN	NaN	NaN	NaN	NaN	NaN	NaN	NaN	NaN	NaN	0.163734	NaN	0.373587	-0.144912	0.171177	NaN	NaN
AT3G20320	Q9LTR2;Q9LTR2-2	TGD2	Protein TRIGALACTOSYLDIACYLGLYCEROL 2, chloroplastic (ABC transporter I family member 15) (ABC transporter ABCI.15) (AtABCI15)	0.0568624	NaN	NaN	NaN	0.528182	NaN	NaN	NaN	2	2	2	6.8	6.8	6.8	41.63	9.0449	4851600	2782800	2068800	NaN	NaN	0.0962391	NaN	NaN	NaN	NaN	NaN	-0.0895921	NaN	NaN	NaN	NaN	0.179371	NaN	0.125554	NaN	-0.0165979	0.106127	0.0123663
AT1G02910	Q9SRY4	LPA1	Protein LOW PSII ACCUMULATION 1, chloroplastic	0.095174	NaN	NaN	NaN	0.581669	NaN	NaN	NaN	2	2	2	8.4	8.4	8.4	50.738	4.0275	4381900	2271500	2110400	NaN	NaN	NaN	NaN	NaN	NaN	NaN	NaN	NaN	NaN	NaN	NaN	NaN	0.464034	0.266438	NaN	NaN	0.00833028	-0.0546802	0.331872
AT3G44330	Q9M292	T22K7_10	Nicalin	-0.056123	NaN	NaN	NaN	0.620753	NaN	NaN	NaN	2	2	2	3.4	3.4	3.4	62.202	3.3136	2733700	1528400	1205400	NaN	NaN	NaN	NaN	NaN	NaN	NaN	NaN	NaN	NaN	NaN	NaN	NaN	NaN	NaN	NaN	0.00836341	-0.132014	NaN	-0.0447183
AT1G06290	P0CZ23	ACX3	Acyl-coenzyme A oxidase 3, peroxisomal (AOX 3) (Acyl-CoA oxidase 3) (EC 1.3.3.6) (Medium-chain acyl-CoA oxidase) (AtCX3)	0.0525699	NaN	NaN	NaN	0.629571	NaN	NaN	NaN	2	2	2	4	4	4	75.675	3.8031	4981300	2889500	2091900	NaN	NaN	0.396901	NaN	NaN	NaN	NaN	0.45366	0.219842	NaN	0.0794124	NaN	NaN	NaN	NaN	-0.0695359	-0.0203012	0.132625	-0.0674895	0.287551
AT3G15690	Q8GRT9;F4J017	At3g15690	Putative acetyl-CoA carboxylase biotin-containing subunit (Single hybrid motif superfamily protein);Single hybrid motif superfamily protein	0.0554706	NaN	NaN	NaN	0.631029	NaN	NaN	NaN	2	2	2	19	19	19	28.169	9.8557	12348000	6384500	5963800	-0.0943111	NaN	NaN	NaN	-0.133332	NaN	NaN	NaN	NaN	NaN	-0.0717325	NaN	NaN	0.133559	NaN	-0.0859636	-0.0259672	NaN	0.112405	0.221408
AT2G07707;ATMG00480	P93303	YMF19	ATP synthase protein YMF19 (EC 3.6.3.14) (Mitochondrial protein YMF19)	0.0572466	NaN	NaN	NaN	0.688649	NaN	NaN	NaN	2	2	2	12.7	12.7	12.7	18.211	5.3568	6737300	3976500	2760800	NaN	NaN	NaN	NaN	NaN	NaN	NaN	NaN	NaN	NaN	NaN	NaN	NaN	NaN	NaN	-0.0633965	NaN	NaN	0.225742	0.00939432
AT3G28200	Q9LHA7	PER31	Peroxidase 31 (Atperox P31) (EC 1.11.1.7) (ATP41)	0.0288619	NaN	NaN	NaN	0.719807	NaN	NaN	NaN	2	2	2	10.4	10.4	10.4	35.302	8.2609	7925500	4279100	3646400	0.956844	NaN	NaN	NaN	NaN	NaN	NaN	NaN	NaN	NaN	0.19522	NaN	0.184585	NaN	NaN	-0.0162746	-0.000190616	0.123179	-0.0630035	0.100599
AT2G25340;AT4G32150;AT5G11150;AT5G16000	Q9LFP1;Q9SIQ9;O49377;Q9LFS4	VAMP713;VAMP712;VAMP711;NIK1	Protein NSP-INTERACTING KINASE 1 (AtNIK1) (EC 2.7.11.1) (LRR receptor-like serine/threonine-protein kinase NIK1);Vesicle-associated membrane protein 711 (AtVAMP711) (v-SNARE synaptobrevin 7C) (AtVAMP7C);Vesicle-associated membrane protein 712 (AtVAMP712);Vesicle-associated membrane protein 713 (AtVAMP713)	-0.0381486	NaN	NaN	NaN	0.731156	NaN	NaN	NaN	2	2	2	9	9	9	25.32	3.4234	10069000	5836000	4233300	NaN	NaN	NaN	NaN	NaN	NaN	NaN	NaN	NaN	NaN	-0.110842	NaN	NaN	NaN	NaN	NaN	-0.025757	NaN	0.00674462	-0.0954335
AT3G01510	F4J117	LSF1	Phosphoglucan phosphatase LSF1, chloroplastic (EC 3.1.3.-) (Phosphoglucan phosphatase like sex Four1) (Protein LIKE SEX4 1)	0.0386732	NaN	NaN	NaN	0.733763	NaN	NaN	NaN	2	2	2	9	9	9	65.74	41.33	2719200	1500100	1219100	NaN	NaN	NaN	NaN	NaN	NaN	NaN	NaN	NaN	NaN	0.158099	NaN	NaN	NaN	NaN	NaN	0.0228211	0.175089	-0.129857	0.0866399
AT1G08980	Q9FR37	AMI1	Amidase 1 (AtAMI1) (EC 3.5.1.4) (Translocon at the outer membrane of chloroplasts 64-I) (AtTOC64-I)	-0.0435322	NaN	NaN	NaN	0.769006	NaN	NaN	NaN	2	2	2	5.9	5.9	5.9	45.056	7.1097	6240600	3456400	2784300	NaN	NaN	NaN	NaN	NaN	NaN	NaN	NaN	NaN	NaN	0.0242373	NaN	NaN	NaN	-0.0152045	0.144661	-0.290494	-0.095887	0.0675914	NaN
AT5G27560	Q94K68	At5g27560	DUF1995 domain protein, putative (DUF1995)	-0.0263366	NaN	NaN	NaN	0.7749	NaN	NaN	NaN	2	2	2	8.2	8.2	8.2	38.046	14.079	5199900	2677400	2522500	NaN	NaN	NaN	NaN	NaN	NaN	NaN	NaN	NaN	NaN	NaN	NaN	NaN	NaN	NaN	NaN	-0.0512082	0.0199042	-0.106798	0.0327558
AT2G18740;AT4G30330	A8MRL6;Q9ZV45;Q8LAK5	At2g18740;At4g30330	At4g30330 (Small nuclear ribonucleoprotein family protein) (Small nuclear ribonucleoprotein homolog);Putative small nuclear ribonucleoprotein E (Small nuclear ribonucleoprotein family protein);Small nuclear ribonucleoprotein family protein	0.0348462	NaN	NaN	NaN	0.838421	NaN	NaN	NaN	2	2	2	38.5	38.5	38.5	9.2547	6.9073	2480700	1513500	967200	NaN	NaN	NaN	NaN	NaN	NaN	-0.226216	-0.280013	NaN	NaN	NaN	NaN	NaN	NaN	NaN	NaN	-0.0758938	NaN	0.264	-0.0835676
ATCG00150	P56758	atpI	ATP synthase subunit a, chloroplastic (ATP synthase F0 sector subunit a) (F-ATPase subunit IV)	0.0182168	NaN	NaN	NaN	0.928835	NaN	NaN	NaN	2	2	2	16.5	16.5	16.5	27.35	4.7315	37050000	19520000	17530000	NaN	NaN	NaN	0.195949	0.268017	NaN	NaN	NaN	NaN	NaN	NaN	NaN	NaN	NaN	NaN	-0.194184	-0.145457	-0.0120756	NaN	0.424584
AT5G64030	Q8L7V3		Probable methyltransferase PMT26 (EC 2.1.1.-)	-0.00908247	NaN	NaN	NaN	0.940447	NaN	NaN	NaN	2	1	1	3.4	2.3	2.3	93.048	13.424	1731300	949770	781520	NaN	NaN	NaN	NaN	NaN	NaN	NaN	NaN	NaN	NaN	NaN	NaN	NaN	NaN	NaN	NaN	-0.0261128	-0.0826301	0.0814955	NaN
AT3G49430	A2RVS6-2;A2RVS6	SR34A	Serine/arginine-rich splicing factor SR34A (At-SR34A) (At-SRp34A) (AtSR34A) (SER/ARG-rich protein 34A)	NaN	NaN	NaN	NaN	NaN	NaN	NaN	NaN	2	2	2	8.1	8.1	8.1	33.462	2.9741	1861800	1234700	627090	NaN	NaN	NaN	NaN	NaN	NaN	NaN	NaN	NaN	NaN	NaN	NaN	NaN	NaN	NaN	NaN	NaN	NaN	NaN	NaN
AT1G24485	F4I9A5;A5PHT0-2;A5PHT0	At1g24485;RWK1	ER protein carbohydrate-binding protein;Uncharacterized protein At1g24485 (Arabidopsis thaliana envelope membrane integrase) (Protein ARTEMIS) (Receptor without kinase 1)	NaN	NaN	NaN	NaN	NaN	NaN	NaN	NaN	2	2	2	4.7	4.7	4.7	62.495	3.0221	2696700	1763500	933230	NaN	NaN	NaN	NaN	NaN	NaN	NaN	NaN	NaN	NaN	NaN	NaN	NaN	NaN	NaN	NaN	NaN	NaN	NaN	NaN
AT1G61150	F4HTG9;A8MQN5;A8MQF1;Q84WK5	At1g61150	LisH and RanBPM domains containing protein;Protein GID8 homolog	NaN	NaN	NaN	NaN	NaN	NaN	NaN	NaN	2	2	2	10.9	10.9	10.9	21.831	2.8653	125490000	66158000	59337000	NaN	NaN	NaN	NaN	NaN	NaN	NaN	NaN	NaN	NaN	NaN	NaN	NaN	NaN	NaN	NaN	NaN	NaN	NaN	NaN
AT2G14170	A8MQR6;A8MQH4;Q0WM29	ALDH6B2	Methylmalonate-semialdehyde dehydrogenase [acylating], mitochondrial (MM-ALDH) (MMSDH) (Malonate-semialdehyde dehydrogenase [acylating]) (EC 1.2.1.27) (Aldehyde dehydrogenase family 6 member B2);Aldehyde dehydrogenase 6B2	NaN	NaN	NaN	NaN	NaN	NaN	NaN	NaN	2	2	2	12	12	12	53.406	8.5505	2120700	1243300	877450	NaN	NaN	NaN	NaN	NaN	NaN	NaN	NaN	NaN	NaN	NaN	-0.325182	NaN	-0.0282427	NaN	NaN	NaN	NaN	-0.185842	NaN
AT3G22380	B3H7F6;Q94KE2	TIC	Protein TIME FOR COFFEE;Time for coffee	NaN	NaN	NaN	NaN	NaN	NaN	NaN	NaN	2	2	2	3.9	3.9	3.9	164.93	4.4053	859230	579280	279950	NaN	NaN	NaN	NaN	NaN	NaN	NaN	NaN	NaN	NaN	NaN	NaN	NaN	NaN	NaN	NaN	NaN	NaN	0.344622	NaN
AT4G37550;AT4G37560	Q9SZE9;B9DFI3;F4JS39;Q8H1G4	F19F18.40;At4g37550;At4g37560	Acetamidase/Formamidase family protein;Acetamidase/Formamidase family protein (Formamidase-like protein) (EC 3.5.1.49);Acetamidase/Formamidase family protein (Putative formamidase);AT4G37550 protein (Acetamidase/Formamidase family protein)	NaN	NaN	NaN	NaN	NaN	NaN	NaN	NaN	2	2	2	9	9	9	47.566	5.2114	1894800	1301700	593110	NaN	NaN	NaN	NaN	NaN	NaN	NaN	NaN	NaN	NaN	NaN	NaN	NaN	NaN	NaN	NaN	NaN	NaN	0.0781993	0.139385
AT1G26850	F4HPE1;B9DFI7-2;B9DFI7	At1g26850	Probable methyltransferase PMT2 (EC 2.1.1.-);S-adenosyl-L-methionine-dependent methyltransferases superfamily protein	NaN	NaN	NaN	NaN	NaN	NaN	NaN	NaN	2	2	2	6.5	6.5	6.5	56.801	13.709	3000000	1891300	1108700	NaN	NaN	NaN	NaN	NaN	NaN	NaN	NaN	NaN	NaN	NaN	NaN	NaN	NaN	NaN	NaN	NaN	NaN	-0.148746	-0.23471
AT1G04750;AT1G04760;AT2G32670;AT2G33120	B9DH97;P47192;Q67YV9;Q9ZTW3;Q9MAS5;O48850	SAR1;VAMP722;VAMP721;VAMP726;VAMP725	Putative vesicle-associated membrane protein, synaptobrevin 7B;AT2G33120 protein (Synaptobrevin-related protein 1);Putative vesicle-associated membrane protein 726 (AtVAMP726);Vesicle-associated membrane protein 721 (AtVAMP721) (v-SNARE synaptobrevin 7B) (AtVAMP7B);Vesicle-associated membrane protein 722 (AtVAMP722) (Synaptobrevin-related protein 1);Vesicle-associated membrane protein 725 (AtVAMP…	NaN	NaN	NaN	NaN	NaN	NaN	NaN	NaN	2	2	2	9.2	9.2	9.2	25.812	4.4672	1081900	440400	641510	NaN	NaN	NaN	NaN	NaN	NaN	NaN	NaN	NaN	NaN	NaN	NaN	NaN	NaN	NaN	NaN	NaN	NaN	NaN	NaN
AT1G53440;AT3G14840	C0LGN2;C0LGG9-2;C0LGG9	LRR-RLK	Probable leucine-rich repeat receptor-like serine/threonine-protein kinase At3g14840 (EC 2.7.11.1);Probable LRR receptor-like serine/threonine-protein kinase At1g53440 (EC 2.7.11.1)	NaN	NaN	NaN	NaN	NaN	NaN	NaN	NaN	2	2	2	3.6	3.6	3.6	112.28	3.9537	2891900	914420	1977400	NaN	NaN	NaN	0.144054	NaN	NaN	NaN	NaN	NaN	NaN	NaN	NaN	NaN	NaN	NaN	NaN	NaN	NaN	NaN	NaN
AT1G21650	F4HY36;D8WUA4-2;D8WUA4	At1g21650;SECA2	Protein translocase subunit SECA2, chloroplastic;Protein translocase subunit SecA	NaN	NaN	NaN	NaN	NaN	NaN	NaN	NaN	2	2	2	1.1	1.1	1.1	203.11	3.0639	944340	664090	280250	NaN	NaN	NaN	NaN	NaN	NaN	NaN	NaN	NaN	NaN	NaN	NaN	NaN	NaN	NaN	NaN	NaN	NaN	NaN	NaN
AT1G67120	F4HRR8	At1g67120	0	NaN	NaN	NaN	NaN	NaN	NaN	NaN	NaN	2	2	2	0.4	0.4	0.4	611.15	2.5475	3091700	1519900	1571800	NaN	NaN	NaN	NaN	NaN	NaN	NaN	NaN	NaN	NaN	NaN	NaN	NaN	-0.593679	NaN	NaN	NaN	NaN	NaN	NaN
AT1G67690	F4HTQ1		Probable thimet oligopeptidase (EC 3.4.24.15) (Zincin-like metalloproteases-like protein 1)	NaN	NaN	NaN	NaN	NaN	NaN	NaN	NaN	2	2	2	3.7	3.7	3.7	80.29	3.6736	82482000	44363000	38119000	NaN	NaN	NaN	-0.22872	NaN	-0.106969	NaN	NaN	NaN	0.170796	NaN	NaN	NaN	NaN	NaN	-0.059068	-0.275476	NaN	NaN	NaN
AT1G55450;AT3G54150	Q9ZVU4;F4I0B5;Q9M389	T5A14.14;At1g55450;F24B22.110	At1g55450/T5A14_14 (S-adenosyl-L-methionine-dependent methyltransferases superfamily protein) (T5A14.14 protein);Embryonic abundant protein-like (Embryonic abundant protein-like protein) (Putative embryonic abundant protein) (S-adenosyl-L-methionine-dependent methyltransferases superfamily protein);S-adenosyl-L-methionine-dependent methyltransferases superfamily protein	NaN	NaN	NaN	NaN	NaN	NaN	NaN	NaN	2	2	2	6.1	6.1	6.1	34.475	3.265	5815800	2560600	3255300	NaN	NaN	NaN	NaN	NaN	NaN	NaN	NaN	NaN	NaN	-0.499025	NaN	NaN	0.116083	NaN	NaN	-0.311178	NaN	NaN	NaN
AT2G28800	F4IJM1;Q8LBP4	ALB3	Inner membrane protein ALBINO3, chloroplastic;63 kDa inner membrane family protein	NaN	NaN	NaN	NaN	NaN	NaN	NaN	NaN	2	2	2	6.9	6.9	6.9	47.071	11.716	2808500	1286500	1522100	NaN	NaN	NaN	NaN	NaN	NaN	NaN	NaN	NaN	NaN	NaN	NaN	NaN	NaN	0.3077	0.245164	NaN	NaN	NaN	0.296519
AT2G02380;AT2G02390	F4IQD1;Q9ZVQ3;Q9ZVQ3-2;Q9ZVQ4	GSTZ1;GSTZ2	Glutathione S-transferase Z1 (AtGSTZ1) (EC 2.5.1.18) (GST class-zeta member 1) (Glutathione S-transferase 18) (Maleylacetone isomerase) (MAI) (EC 5.2.1.-);Glutathione S-transferase Z2 (AtGSTZ2) (EC 2.5.1.18) (GST class-zeta member 2);Glutathione S-transferase zeta 1	NaN	NaN	NaN	NaN	NaN	NaN	NaN	NaN	2	2	2	19.4	19.4	19.4	21.578	8.9174	1647200	830360	816790	NaN	NaN	NaN	NaN	NaN	NaN	NaN	NaN	NaN	NaN	NaN	NaN	NaN	0.00623912	NaN	NaN	NaN	NaN	NaN	NaN
AT2G25840	F4ISP6;Q8RXE9;F4ISP4	OVA4	Tryptophan--tRNA ligase, chloroplastic/mitochondrial (EC 6.1.1.2) (Protein OVULE ABORTION 4) (Tryptophanyl-tRNA synthetase) (TrpRS);Nucleotidylyl transferase superfamily protein	NaN	NaN	NaN	NaN	NaN	NaN	NaN	NaN	2	2	2	9.6	9.6	9.6	43.913	6.7749	2904700	2257600	647130	NaN	NaN	NaN	NaN	NaN	NaN	NaN	NaN	NaN	NaN	NaN	NaN	NaN	-0.37431	NaN	NaN	NaN	NaN	NaN	NaN
AT3G03100	F4IZR4;Q9M9M9	At3g03100	NADH dehydrogenase [ubiquinone] 1 alpha subcomplex subunit 12;Probable NADH dehydrogenase [ubiquinone] 1 alpha subcomplex subunit 12	NaN	NaN	NaN	NaN	NaN	NaN	NaN	NaN	2	2	2	17.6	17.6	17.6	18.291	2.757	1604900	1047100	557860	NaN	NaN	NaN	NaN	NaN	NaN	NaN	NaN	NaN	NaN	NaN	NaN	NaN	0.0322298	NaN	NaN	NaN	NaN	NaN	NaN
AT3G44750	F4J378;Q9FVE6	HDA3;HDT1	Histone deacetylase 3;Histone deacetylase HDT1 (HD-tuins protein 1) (Histone deacetylase 2a)	NaN	NaN	NaN	NaN	NaN	NaN	NaN	NaN	2	2	2	14.9	14.9	14.9	25.985	9.7703	1087600	659450	428160	NaN	NaN	NaN	NaN	NaN	NaN	NaN	NaN	NaN	NaN	NaN	NaN	NaN	NaN	NaN	NaN	NaN	NaN	0.366272	0.030446
AT3G04600	Q9SR15;F4J4T3	F7O18.7;At3g04600	Tryptophan--tRNA ligase, cytoplasmic (EC 6.1.1.2) (Tryptophanyl-tRNA synthetase) (TrpRS);Nucleotidylyl transferase superfamily protein	NaN	NaN	NaN	NaN	NaN	NaN	NaN	NaN	2	2	2	5.5	5.5	5.5	45.754	3.0634	781860	468800	313060	NaN	NaN	NaN	NaN	NaN	NaN	NaN	NaN	NaN	NaN	NaN	NaN	NaN	NaN	NaN	NaN	NaN	-0.348649	NaN	NaN
AT3G45190	F4J5I0	At3g45190	SIT4 phosphatase-associated family protein	NaN	NaN	NaN	NaN	NaN	NaN	NaN	NaN	2	2	2	3.9	3.9	3.9	87.639	6.9339	829200	437620	391570	NaN	NaN	NaN	NaN	NaN	NaN	NaN	NaN	NaN	NaN	NaN	NaN	NaN	NaN	NaN	NaN	NaN	NaN	NaN	0.459064
AT3G52140	F4J5S0;F4J5R9;F4J5S1-2;F4J5S1	At3g52140;FMT	Clustered mitochondria protein (Friendly mitochondria protein);Clustered mitochondria protein homolog	NaN	NaN	NaN	NaN	NaN	NaN	NaN	NaN	2	2	2	2.2	2.2	2.2	152.52	3.4988	1336100	711510	624620	NaN	NaN	NaN	NaN	NaN	NaN	NaN	0.24334	NaN	0.246586	NaN	NaN	NaN	NaN	NaN	NaN	NaN	NaN	NaN	NaN
AT3G52200	F4J5T2;Q0WQF7	LTA3	Dihydrolipoyllysine-residue acetyltransferase component 1 of pyruvate dehydrogenase complex, mitochondrial (EC 2.3.1.12) (Dihydrolipoamide S-acetyltransferase component 1 of pyruvate dehydrogenase complex) (Pyruvate dehydrogenase complex component E2 1) (PDC-E2 1) (PDCE2 1);Dihydrolipoamide acetyltransferase component of pyruvate dehydrogenase complex (EC 2.3.1.-)	NaN	NaN	NaN	NaN	NaN	NaN	NaN	NaN	2	2	2	5.6	5.6	5.6	77.893	3.9377	370820	239260	131560	NaN	NaN	NaN	NaN	NaN	NaN	NaN	NaN	NaN	NaN	NaN	NaN	NaN	-0.105098	NaN	NaN	NaN	NaN	NaN	NaN
AT2G36060;AT3G52560	F4J6Z1;Q9SVD7;Q9SVD7-2;Q9SVD7-3;Q9SJ44-3;Q9SJ44;Q9SJ44-2	UEV1D-4;UEV1D;UEV1C	Ubiquitin E2 variant 1D-4;Ubiquitin-conjugating enzyme E2 variant 1C (Ubc enzyme variant 1C) (Protein MMS ZWEI HOMOLOG 3);Ubiquitin-conjugating enzyme E2 variant 1D (Ubc enzyme variant 1D) (Protein MMS ZWEI HOMOLOG 4)	NaN	NaN	NaN	NaN	NaN	NaN	NaN	NaN	2	2	2	19.5	19.5	19.5	18.589	68.723	1621100	911720	709410	NaN	NaN	NaN	NaN	NaN	NaN	NaN	NaN	NaN	NaN	0.196803	NaN	NaN	NaN	0.0881234	NaN	NaN	NaN	0.307288	NaN
AT3G11780	Q9SF20;F4J7G5	F26K24.7;At3g11780	F26K24.7 protein (MD-2-related lipid recognition domain-containing protein / ML domain-containing protein);MD-2-related lipid recognition domain-containing protein / ML domain-containing protein	NaN	NaN	NaN	NaN	NaN	NaN	NaN	NaN	2	2	2	17	17	17	16.805	13.959	9526200	5404800	4121400	NaN	NaN	NaN	NaN	NaN	NaN	NaN	NaN	NaN	NaN	-0.32426	NaN	NaN	-0.0756205	NaN	-0.347499	NaN	NaN	NaN	-0.0343611
AT3G48500	F4JF21;F4JF21-2	PDE312	Protein PLASTID TRANSCRIPTIONALLY ACTIVE 10 (pTAC10) (Plastid-encoded RNA polymerase-associated protein 3) (PEP-associated protein 3) (Protein PIGMENT DEFECTIVE 312)	NaN	NaN	NaN	NaN	NaN	NaN	NaN	NaN	2	2	2	3.9	3.9	3.9	78.813	4.1545	1871900	824980	1046900	NaN	NaN	NaN	NaN	NaN	NaN	NaN	NaN	NaN	NaN	NaN	NaN	NaN	NaN	NaN	0.252464	0.292512	NaN	NaN	NaN
AT4G33650	F4JJ15;Q8S944	DRP3A	Dynamin-related protein 3A;Dynamin-related protein 3A (Dynamin-like protein 2) (Dynamin-like protein 2a)	NaN	NaN	NaN	NaN	NaN	NaN	NaN	NaN	2	2	2	4.1	4.1	4.1	89.754	9.8786	5312700	2661100	2651600	NaN	NaN	NaN	NaN	NaN	NaN	NaN	NaN	NaN	NaN	0.476979	NaN	NaN	NaN	NaN	NaN	NaN	NaN	0.898988	NaN
AT4G17100	Q8RWB6;F4JNE1	At4g17100	Poly(U)-specific endoribonuclease-B protein;Putative serine protease-like protein	NaN	NaN	NaN	NaN	NaN	NaN	NaN	NaN	2	2	2	6.7	6.7	6.7	49.415	3.6545	980040	600200	379840	NaN	NaN	NaN	NaN	NaN	NaN	NaN	NaN	NaN	NaN	NaN	NaN	NaN	NaN	NaN	NaN	NaN	NaN	0.458141	NaN
AT4G14160	Q8VXX0;F4JUM1;F4JUM3	At4g14160	Putative transport protein (Sec23/Sec24 protein transport family protein);Sec23/Sec24 protein transport family protein	NaN	NaN	NaN	NaN	NaN	NaN	NaN	NaN	2	2	1	3.4	3.4	1.8	85.277	3.8981	993920	599700	394220	NaN	NaN	NaN	NaN	NaN	NaN	NaN	NaN	NaN	NaN	NaN	NaN	NaN	-0.000587791	0.428757	NaN	NaN	NaN	NaN	NaN
AT5G18520	F4JY11	At5g18520	Lung seven transmembrane receptor family protein	NaN	NaN	NaN	NaN	NaN	NaN	NaN	NaN	2	2	2	6.8	6.8	6.8	50.244	3.1253	1540400	880520	659870	NaN	NaN	NaN	NaN	NaN	NaN	NaN	NaN	NaN	NaN	NaN	NaN	NaN	NaN	NaN	NaN	NaN	NaN	NaN	NaN
AT5G41970	F4K000	At5g41970	Metal-dependent protein hydrolase	NaN	NaN	NaN	NaN	NaN	NaN	NaN	NaN	2	2	2	6.4	6.4	6.4	42.299	3.0414	224810	150360	74450	NaN	NaN	NaN	NaN	NaN	NaN	NaN	NaN	NaN	NaN	NaN	NaN	NaN	NaN	NaN	NaN	NaN	NaN	NaN	NaN
AT5G20140	Q8VZ90;F4K452	At5g20140	SOUL heme-binding family protein	NaN	NaN	NaN	NaN	NaN	NaN	NaN	NaN	2	2	2	6.6	6.6	6.6	43.159	2.7833	1034200	521060	513150	NaN	NaN	NaN	NaN	NaN	NaN	NaN	NaN	NaN	NaN	NaN	NaN	NaN	NaN	NaN	NaN	NaN	NaN	NaN	NaN
AT5G28050	Q94BU8;F4K5T6	At5g28050	Cytidine/deoxycytidylate deaminase family protein;Guanosine deaminase (EC 3.5.4.15) (tRNA-specific adenosine deaminase TAD4) (AtTAD4)	NaN	NaN	NaN	NaN	NaN	NaN	NaN	NaN	2	2	2	17.3	17.3	17.3	20.001	4.9994	4337300	2505800	1831500	NaN	NaN	NaN	NaN	NaN	NaN	-0.273083	-0.0950358	NaN	NaN	NaN	NaN	NaN	NaN	NaN	NaN	NaN	0.0517147	NaN	NaN
AT5G62720	F4K7S5;Q8GZ51	At5g62720	At5g62720 (Integral membrane HPP family protein);Integral membrane HPP family protein	NaN	NaN	NaN	NaN	NaN	NaN	NaN	NaN	2	2	2	23	23	23	21.012	2.9838	340580	99744	240840	NaN	NaN	NaN	NaN	NaN	NaN	NaN	NaN	NaN	NaN	NaN	NaN	NaN	NaN	NaN	NaN	NaN	NaN	NaN	NaN
AT3G09980;AT5G03660	F4KGP6;Q940P0;Q8RXZ8	At5g03660;At3g09980	Ankyrin repeat 30A-like protein (DUF662) (At3g09980);AT5g03660/F17C15_80 (Transcriptional activator (DUF662));Transcriptional activator (DUF662)	NaN	NaN	NaN	NaN	NaN	NaN	NaN	NaN	2	2	2	15.2	15.2	15.2	17.666	3.1842	78283000	39229000	39054000	NaN	NaN	NaN	NaN	NaN	NaN	NaN	NaN	NaN	NaN	NaN	NaN	NaN	NaN	NaN	NaN	NaN	NaN	NaN	NaN
AT5G17530	Q8W4R0;F4KH14	At5g17530	AT5g17530/K10A8_10 (Phosphoglucosamine mutase family protein);Phosphoglucosamine mutase family protein	NaN	NaN	NaN	NaN	NaN	NaN	NaN	NaN	2	2	2	8.3	8.3	8.3	62.875	41.856	1791700	1054700	737020	NaN	NaN	NaN	NaN	NaN	NaN	NaN	NaN	NaN	NaN	0.288374	NaN	NaN	NaN	NaN	NaN	NaN	NaN	-0.0435144	NaN
AT4G02110	O04251		BRCT domain-containing protein At4g02110	NaN	NaN	NaN	NaN	NaN	NaN	NaN	NaN	2	2	2	2.3	2.3	2.3	145.93	3.4018	9165800	5162700	4003100	NaN	NaN	NaN	NaN	NaN	NaN	NaN	NaN	NaN	NaN	NaN	NaN	NaN	NaN	NaN	-0.0916883	-0.168714	NaN	NaN	NaN
AT3G16470	O04309-2;O04309	JAL35	Jacalin-related lectin 35 (JA-responsive protein 1) (Myrosinase-binding protein-like At3g16470)	NaN	NaN	NaN	NaN	NaN	NaN	NaN	NaN	2	2	2	11.1	11.1	11.1	32.09	3.525	234960	160030	74934	NaN	NaN	NaN	NaN	NaN	NaN	NaN	NaN	NaN	NaN	NaN	NaN	NaN	NaN	NaN	NaN	NaN	NaN	NaN	NaN
AT1G65650	O04482	F5I14.18	Ubiquitin carboxyl-terminal hydrolase 2 (EC 3.4.19.12)	NaN	NaN	NaN	NaN	NaN	NaN	NaN	NaN	2	2	2	10.6	10.6	10.6	37.498	7.4248	3339600	1799300	1540200	NaN	NaN	NaN	NaN	NaN	NaN	NaN	NaN	NaN	NaN	NaN	NaN	NaN	0.182023	NaN	NaN	0.0166942	0.256195	NaN	NaN
AT2G41560;AT3G57330	O22218;Q9M2L4	ACA4;ACA11	Calcium-transporting ATPase 4, plasma membrane-type (EC 3.6.3.8) (Ca(2+)-ATPase isoform 4);"Putative calcium-transporting ATPase 11, plasma membrane-type (EC 3.6.3.8) (Ca(2+)-ATPase isoform 11)"	NaN	NaN	NaN	NaN	NaN	NaN	NaN	NaN	2	2	2	3	3	3	112.75	10.488	533840	355660	178180	NaN	NaN	NaN	NaN	NaN	NaN	NaN	NaN	NaN	NaN	NaN	NaN	NaN	NaN	NaN	NaN	NaN	NaN	NaN	NaN
AT2G47640;AT3G62840	O22247;Q8RUH0	F26K9_270	At2g47640 (Putative small nuclear ribonucleoprotein D2) (Small nuclear ribonucleoprotein family protein) (Small nuclear ribonucleoprotein-like protein);Putative small nuclear ribonucleoprotein D2 (Small nuclear ribonucleoprotein family protein)	NaN	NaN	NaN	NaN	NaN	NaN	NaN	NaN	2	2	2	17.6	17.6	17.6	12.507	2.6549	1731900	949790	782090	NaN	NaN	NaN	NaN	NaN	NaN	NaN	-0.436195	NaN	NaN	NaN	NaN	NaN	NaN	NaN	NaN	NaN	NaN	NaN	NaN
AT2G33410	O22791	At2g33410	Putative RNA-binding protein (RNA-binding (RRM/RBD/RNP motifs) family protein)	NaN	NaN	NaN	NaN	NaN	NaN	NaN	NaN	2	2	2	7.7	7.7	7.7	41.328	2.8726	1281100	582580	698520	NaN	NaN	NaN	NaN	NaN	NaN	NaN	NaN	NaN	NaN	NaN	NaN	NaN	NaN	NaN	NaN	NaN	NaN	NaN	NaN
AT2G40610	O22874	EXPA8	Expansin-A8 (AtEXPA8) (Alpha-expansin-8) (At-EXP8) (AtEx8) (Ath-ExpAlpha-1.11)	NaN	NaN	NaN	NaN	NaN	NaN	NaN	NaN	2	1	1	12.6	9.1	9.1	27.26	32.637	2859500	1701600	1157900	NaN	NaN	NaN	NaN	NaN	NaN	NaN	NaN	NaN	NaN	NaN	NaN	NaN	-0.0119087	NaN	NaN	NaN	NaN	NaN	NaN
AT1G22840;AT4G10040	O23138;B3H4Y9;Q9T0G2	CYTC-1;CYTC-2	CYTOCHROME C-1;Cytochrome c-1 (Cytochrome c At1g22840);Cytochrome c-2 (Cytochrome c At4g10040)	NaN	NaN	NaN	NaN	NaN	NaN	NaN	NaN	2	2	2	20.2	20.2	20.2	12.394	20.79	1666700	884730	781930	NaN	NaN	NaN	NaN	NaN	NaN	NaN	NaN	NaN	NaN	NaN	NaN	NaN	0.039991	NaN	NaN	NaN	NaN	NaN	NaN
AT4G18040	O23252	EIF4E1	Eukaryotic translation initiation factor 4E-1 (eIF-4E-1) (eIF4E-1) (Protein cucumovirus multiplication 1) (eIF-4F 25 kDa subunit) (eIF-4F p26 subunit) (mRNA cap-binding protein)	NaN	NaN	NaN	NaN	NaN	NaN	NaN	NaN	2	2	2	17	17	17	26.519	29.594	2071500	1271900	799610	NaN	NaN	NaN	NaN	NaN	NaN	NaN	NaN	NaN	NaN	NaN	NaN	NaN	NaN	NaN	NaN	NaN	NaN	0.133901	-0.496742
AT4G14870	O23342	SECE1	Preprotein translocase subunit SECE1	NaN	NaN	NaN	NaN	NaN	NaN	NaN	NaN	2	2	2	21.5	21.5	21.5	19.12	48.809	1856800	1004200	852540	NaN	NaN	NaN	NaN	0.296328	NaN	NaN	NaN	NaN	NaN	NaN	NaN	NaN	NaN	NaN	NaN	NaN	NaN	NaN	NaN
AT1G43890;AT5G03530	O23657;O49841	RABC1;RABC2A	Ras-related protein RABC1 (AtRABC1) (Ras-related protein Rab18) (AtRab18);Ras-related protein RABC2a (AtRABC2a) (Ras-related protein Rab18B) (AtRab18B)	NaN	NaN	NaN	NaN	NaN	NaN	NaN	NaN	2	2	2	9	9	9	23.53	2.5947	5690800	2699900	2990900	NaN	NaN	NaN	-1.15566	NaN	NaN	NaN	NaN	NaN	NaN	NaN	NaN	NaN	-1.59883	NaN	NaN	NaN	NaN	NaN	NaN
AT3G27430;AT5G40580	O23710-2;O23710;Q7DLS1;F4IWI5;F4KIN7	PBB1;PBB2	20S proteasome beta subunit PBB2;N-terminal nucleophile aminohydrolases (Ntn hydrolases) superfamily protein;Proteasome subunit beta type-7-A (EC 3.4.25.1) (20S proteasome beta subunit B-1) (Proteasome component FA) (Proteasome component FB) (Proteasome subunit beta type-2);Proteasome subunit beta type-7-B (EC 3.4.25.1) (20S proteasome beta subunit B-2) (Proteasome component FC) (Proteasome subun…	NaN	NaN	NaN	NaN	NaN	NaN	NaN	NaN	2	2	2	7.5	7.5	7.5	28.811	3.1841	8144000	4310500	3833500	NaN	NaN	NaN	-0.66092	-0.525174	NaN	NaN	0.240586	NaN	NaN	NaN	NaN	NaN	NaN	NaN	NaN	NaN	NaN	NaN	NaN
AT1G24100	O48676;O48676-2	UGT74B1	UDP-glycosyltransferase 74B1 (N-hydroxythioamide S-beta-glucosyltransferase) (EC 2.4.1.195) (Thiohydroximate S-glucosyltransferase)	NaN	NaN	NaN	NaN	NaN	NaN	NaN	NaN	2	2	2	5.9	5.9	5.9	51.002	3.6422	3893300	2490500	1402800	NaN	NaN	NaN	NaN	NaN	NaN	NaN	NaN	NaN	NaN	NaN	NaN	NaN	NaN	NaN	NaN	NaN	NaN	NaN	0.178768
AT2G26570	O48724	WEB1	Protein WEAK CHLOROPLAST MOVEMENT UNDER BLUE LIGHT 1 (Protein WEB1)	NaN	NaN	NaN	NaN	NaN	NaN	NaN	NaN	2	2	2	2.6	2.6	2.6	89.293	9.7721	2037600	740640	1297000	NaN	NaN	NaN	NaN	NaN	NaN	NaN	NaN	NaN	NaN	NaN	NaN	NaN	NaN	NaN	NaN	NaN	NaN	NaN	NaN
AT4G39680	O65655	At4g39680	SAP domain-containing protein	NaN	NaN	NaN	NaN	NaN	NaN	NaN	NaN	2	2	2	6.3	6.3	6.3	69.441	70.424	1511900	928640	583270	NaN	NaN	NaN	NaN	NaN	NaN	NaN	NaN	NaN	NaN	NaN	NaN	NaN	NaN	NaN	NaN	NaN	NaN	0.579785	NaN
AT2G29990	O80874	NDA2	Internal alternative NAD(P)H-ubiquinone oxidoreductase A2, mitochondrial (EC 1.6.5.9) (Internal alternative NADH dehydrogenase NDA2) (NADH:ubiquinone reductase (non-electrogenic) NDA2)	NaN	NaN	NaN	NaN	NaN	NaN	NaN	NaN	2	2	2	7.9	7.9	7.9	56.502	2.9217	9316200	4537600	4778700	NaN	NaN	NaN	NaN	NaN	NaN	NaN	NaN	NaN	NaN	NaN	NaN	NaN	NaN	NaN	NaN	NaN	NaN	NaN	NaN
AT2G47910	Q3EBE3;O82258	CRR6	Protein CHLORORESPIRATORY REDUCTION 6, chloroplastic;Chlororespiratory reduction 6	NaN	NaN	NaN	NaN	NaN	NaN	NaN	NaN	2	2	2	17.2	17.2	17.2	22.837	52.657	927460	511940	415510	NaN	NaN	NaN	NaN	NaN	NaN	NaN	NaN	NaN	NaN	NaN	NaN	NaN	-0.43483	NaN	NaN	NaN	NaN	NaN	NaN
AT4G10750	O82487	T12H20.10	Phosphoenolpyruvate carboxylase family protein (Putative aldolase) (T12H20.10 protein)	NaN	NaN	NaN	NaN	NaN	NaN	NaN	NaN	2	2	2	9.8	9.8	9.8	38.404	2.772	1056700	723960	332730	NaN	NaN	NaN	NaN	NaN	NaN	NaN	NaN	NaN	NaN	NaN	NaN	NaN	NaN	NaN	NaN	NaN	NaN	NaN	NaN
AT4G23710	O82629	VHA-G2	V-type proton ATPase subunit G2 (V-ATPase subunit G2) (Vacuolar H(+)-ATPase subunit G isoform 2) (Vacuolar proton pump subunit G2)	NaN	NaN	NaN	NaN	NaN	NaN	NaN	NaN	2	2	2	17	17	17	11.742	3.8134	1325100	789270	535840	NaN	NaN	NaN	NaN	NaN	NaN	NaN	NaN	NaN	NaN	NaN	NaN	NaN	NaN	NaN	NaN	NaN	NaN	NaN	NaN
AT1G31860	O82768	HISN2	Histidine biosynthesis bifunctional protein hisIE, chloroplastic (Protein HISTIDINE BIOSYNTHESIS 2) [Includes: Phosphoribosyl-AMP cyclohydrolase (PRA-CH) (EC 3.5.4.19);Phosphoribosyl-ATP pyrophosphatase (PRA-PH) (EC 3.6.1.31)]	NaN	NaN	NaN	NaN	NaN	NaN	NaN	NaN	2	2	2	8.9	8.9	8.9	31.667	4.1464	1397900	759730	638220	NaN	NaN	NaN	NaN	NaN	NaN	NaN	NaN	NaN	NaN	NaN	NaN	NaN	NaN	NaN	-0.175419	NaN	-0.0823513	NaN	NaN
AT1G07440	P0DKI3;F4HQN3	At1g07440	NAD(P)-binding Rossmann-fold superfamily protein;Tropinone reductase homolog At1g07440 (EC 1.1.1.-)	NaN	NaN	NaN	NaN	NaN	NaN	NaN	NaN	2	2	2	13.5	13.5	13.5	28.332	5.7702	3743800	2818700	925030	NaN	NaN	NaN	NaN	NaN	NaN	NaN	NaN	NaN	NaN	NaN	NaN	-0.151125	NaN	NaN	NaN	-2.2272	NaN	NaN	NaN
AT3G48750	P24100	CDKA-1	1) (EC 2.7.11.22) (EC 2.7.11.23) (Cell division control protein 2 homolog A);Cyclin-dependent kinase A-1 (CDKA	NaN	NaN	NaN	NaN	NaN	NaN	NaN	NaN	2	2	2	11.6	11.6	11.6	34.03	2.976	1133400	887530	245870	NaN	NaN	NaN	NaN	NaN	NaN	NaN	NaN	NaN	NaN	NaN	NaN	NaN	NaN	NaN	NaN	NaN	NaN	-0.0316371	NaN
AT1G54580;AT1G54630	P25701;F4HWZ6	ACP2;ACP3	Acyl carrier protein 2, chloroplastic (ACP-2);Acyl carrier protein 3	NaN	NaN	NaN	NaN	NaN	NaN	NaN	NaN	2	1	1	22.8	15.4	15.4	14.528	64.439	3100600	2021800	1078900	NaN	NaN	NaN	NaN	NaN	NaN	NaN	NaN	NaN	NaN	NaN	NaN	NaN	NaN	NaN	NaN	NaN	-0.225499	NaN	NaN
AT3G10410	P32826	SCPL49	Serine carboxypeptidase-like 49 (EC 3.4.16.-)	NaN	NaN	NaN	NaN	NaN	NaN	NaN	NaN	2	2	2	10.5	10.5	10.5	57.301	8.0712	2605200	1311700	1293600	NaN	NaN	NaN	NaN	NaN	NaN	NaN	NaN	NaN	NaN	NaN	NaN	NaN	NaN	NaN	NaN	-0.101009	NaN	NaN	NaN
AT3G21110	P38025	PUR7	Phosphoribosylaminoimidazole-succinocarboxamide synthase, chloroplastic (EC 6.3.2.6) (SAICAR synthetase)	NaN	NaN	NaN	NaN	NaN	NaN	NaN	NaN	2	2	2	8.5	8.5	8.5	46.063	3.0514	734660	485410	249250	NaN	NaN	NaN	NaN	NaN	NaN	NaN	NaN	NaN	NaN	NaN	NaN	NaN	NaN	NaN	NaN	NaN	NaN	NaN	NaN
AT3G20330	P49077	PYRB	Aspartate carbamoyltransferase, chloroplastic (EC 2.1.3.2) (Aspartate transcarbamylase) (ATCase)	NaN	NaN	NaN	NaN	NaN	NaN	NaN	NaN	2	2	2	6.2	6.2	6.2	43.166	4.2073	1328900	775760	553130	NaN	NaN	NaN	NaN	NaN	NaN	NaN	NaN	NaN	NaN	NaN	NaN	NaN	0.377836	NaN	NaN	NaN	NaN	NaN	NaN
ATCG00180	P56763	rpoC1	DNA-directed RNA polymerase subunit beta' (EC 2.7.7.6) (PEP) (Plastid-encoded RNA polymerase subunit beta') (RNA polymerase subunit beta')	NaN	NaN	NaN	NaN	NaN	NaN	NaN	NaN	2	2	2	4	4	4	78.582	4.7036	951910	495680	456230	NaN	NaN	NaN	NaN	NaN	NaN	NaN	NaN	NaN	NaN	NaN	NaN	NaN	NaN	NaN	NaN	NaN	NaN	NaN	NaN
ATCG00860;ATCG01280	P56786	ycf2-A	Protein Ycf2	NaN	NaN	NaN	NaN	NaN	NaN	NaN	NaN	2	2	2	1.1	1.1	1.1	269.56	3.4442	1910600	1090900	819620	NaN	NaN	NaN	NaN	NaN	NaN	NaN	NaN	NaN	NaN	NaN	NaN	NaN	NaN	NaN	NaN	NaN	NaN	NaN	NaN
AT4G21990	P92980	APR3	5'-adenylylsulfate reductase 3, chloroplastic (EC 1.8.4.9) (3'-phosphoadenosine-5'-phosphosulfate reductase homolog 26) (PAPS reductase homolog 26) (Prh-26) (Adenosine 5'-phosphosulfate 5'-adenylylsulfate sulfotransferase 3) (APS sulfotransferase 3) (Thioredoxin-independent APS reductase 3)	NaN	NaN	NaN	NaN	NaN	NaN	NaN	NaN	2	1	1	6.3	2.8	2.8	50.694	4.3966	379050	362530	16516	NaN	NaN	NaN	NaN	NaN	NaN	NaN	NaN	NaN	NaN	NaN	NaN	NaN	NaN	NaN	NaN	NaN	NaN	NaN	NaN
AT5G22830	Q058N4	MRS2-11	Magnesium transporter MRS2-11, chloroplastic (Magnesium Transporter 10) (AtMGT10)	NaN	NaN	NaN	NaN	NaN	NaN	NaN	NaN	2	2	2	8.3	8.3	8.3	51.093	2.7667	640900	361100	279800	NaN	NaN	NaN	NaN	NaN	NaN	NaN	NaN	NaN	NaN	NaN	NaN	NaN	NaN	NaN	NaN	NaN	0.153007	NaN	NaN
AT5G15610	Q0WSE9;Q9LF21	At5g15610;T20K14_220	Eukaryotic translation initiation factor 3 subunit M (eIF3m)	NaN	NaN	NaN	NaN	NaN	NaN	NaN	NaN	2	2	2	9.2	9.2	9.2	46.418	3.7469	3621800	1489600	2132300	NaN	NaN	NaN	NaN	NaN	NaN	NaN	NaN	NaN	NaN	NaN	NaN	NaN	NaN	NaN	NaN	NaN	NaN	NaN	NaN
AT4G01883	Q1G3L2	At4g01883	Polyketide cyclase / dehydrase and lipid transport protein	NaN	NaN	NaN	NaN	NaN	NaN	NaN	NaN	2	2	2	11.6	11.6	11.6	25.288	3.4185	1759600	978270	781350	NaN	NaN	NaN	NaN	NaN	NaN	NaN	NaN	NaN	NaN	NaN	NaN	NaN	NaN	NaN	NaN	0.490707	NaN	NaN	NaN
AT2G18710	Q38885	SCY1	Preprotein translocase subunit SCY1, chloroplastic (CpSecY)	NaN	NaN	NaN	NaN	NaN	NaN	NaN	NaN	2	2	2	8	8	8	59.492	7.9981	2943700	1528000	1415700	NaN	NaN	NaN	0.282598	NaN	NaN	NaN	NaN	NaN	NaN	NaN	NaN	NaN	NaN	NaN	NaN	NaN	NaN	0.324297	NaN
AT5G48580	Q38936	FKBP15-2	Peptidyl-prolyl cis-trans isomerase FKBP15-2 (PPIase FKBP15-2) (EC 5.2.1.8) (15 kDa FK506-binding protein) (15 kDa FKBP) (FK506-binding protein 15-2) (AtFKBP15-2) (FK506-binding protein 2-2) (Immunophilin FKBP15-2) (Rotamase)	NaN	NaN	NaN	NaN	NaN	NaN	NaN	NaN	2	1	1	16.6	8.6	8.6	17.658	2.7428	508820	237130	271690	NaN	NaN	NaN	NaN	NaN	NaN	NaN	NaN	NaN	NaN	NaN	NaN	NaN	NaN	NaN	NaN	NaN	NaN	NaN	NaN
AT2G43790	Q39026	MPK6	Mitogen-activated protein kinase 6 (AtMPK6) (MAP kinase 6) (EC 2.7.11.24)	NaN	NaN	NaN	NaN	NaN	NaN	NaN	NaN	2	2	2	7.6	7.6	7.6	45.057	20.704	2043400	1124100	919230	NaN	NaN	NaN	NaN	NaN	NaN	NaN	NaN	NaN	NaN	NaN	NaN	0.271937	0.546294	NaN	NaN	NaN	NaN	NaN	NaN
AT5G27700	Q3E902	RPS21C	40S ribosomal protein S21-2	NaN	NaN	NaN	NaN	NaN	NaN	NaN	NaN	2	1	1	57.3	18.3	18.3	9.1131	124.25	517960	324460	193500	NaN	NaN	NaN	NaN	NaN	NaN	NaN	NaN	NaN	NaN	NaN	NaN	NaN	NaN	NaN	NaN	NaN	NaN	NaN	NaN
AT2G14750	Q43295	APK1	Adenylyl-sulfate kinase 1, chloroplastic (EC 2.7.1.25) (ATP adenosine-5'-phosphosulfate 3'-phosphotransferase 1) (Adenosine-5'-phosphosulfate kinase 1) (APS kinase 1)	NaN	NaN	NaN	NaN	NaN	NaN	NaN	NaN	2	2	2	13.4	13.4	13.4	29.787	5.1706	8711800	4770500	3941300	NaN	NaN	NaN	0.153268	NaN	NaN	NaN	NaN	NaN	NaN	NaN	NaN	NaN	0.0906494	NaN	-0.0380054	NaN	7.40811e-05	NaN	NaN
AT2G26250	Q570B4	FDH	3-ketoacyl-CoA synthase 10 (KCS-10) (EC 2.3.1.199) (Protein FIDDLEHEAD) (Very long-chain fatty acid condensing enzyme 10) (VLCFA condensing enzyme 10)	NaN	NaN	NaN	NaN	NaN	NaN	NaN	NaN	2	2	2	5.3	5.3	5.3	61.96	7.9233	1643500	1026100	617350	NaN	NaN	NaN	NaN	NaN	NaN	NaN	NaN	NaN	NaN	NaN	NaN	NaN	NaN	NaN	NaN	NaN	NaN	-0.108714	-0.171021
AT2G43160;AT3G59290	Q67YI9;Q67YI9-2;Q93YP4	EPSIN2;EPSIN3	Clathrin interactor EPSIN 2 (EPSIN-related 2);Clathrin interactor EPSIN 3 (EPSIN-related 3)	NaN	NaN	NaN	NaN	NaN	NaN	NaN	NaN	2	2	2	3.8	3.8	3.8	95.477	13.701	1391200	969720	421460	NaN	NaN	NaN	NaN	NaN	NaN	NaN	NaN	NaN	NaN	NaN	NaN	NaN	NaN	NaN	NaN	NaN	NaN	0.245645	NaN
AT5G04360	Q8GTR4	PU1	Pullulanase 1, chloroplastic (AtPU1) (EC 3.2.1.142) (Protein LIMIT DEXTRINASE) (AtLDA)	NaN	NaN	NaN	NaN	NaN	NaN	NaN	NaN	2	2	2	3.8	3.8	3.8	107.07	33.085	457140	192850	264300	NaN	NaN	NaN	NaN	NaN	NaN	NaN	NaN	NaN	NaN	NaN	NaN	NaN	NaN	NaN	NaN	NaN	NaN	NaN	NaN
AT3G05625	Q8GUK5	At3g05625	At3g05625 (Tetratricopeptide repeat (TPR)-like superfamily protein)	NaN	NaN	NaN	NaN	NaN	NaN	NaN	NaN	2	2	2	10.5	10.5	10.5	28.952	2.951	1552300	575610	976700	NaN	NaN	NaN	NaN	NaN	NaN	NaN	NaN	NaN	NaN	NaN	NaN	NaN	NaN	NaN	NaN	NaN	NaN	2.34149	NaN
AT4G20960	Q8GWP5	PYRD	Riboflavin biosynthesis protein PYRD, chloroplastic [Includes: Diaminohydroxyphosphoribosylaminopyrimidine deaminase (DRAP deaminase) (EC 3.5.4.26) (Riboflavin-specific deaminase);Inactive 5-amino-6-(5-phosphoribosylamino)uracil reductase (HTP reductase)]	NaN	NaN	NaN	NaN	NaN	NaN	NaN	NaN	2	2	2	4.9	4.9	4.9	46.673	4.7556	1660300	798710	861570	NaN	NaN	NaN	NaN	NaN	NaN	NaN	NaN	NaN	NaN	NaN	NaN	NaN	NaN	NaN	NaN	NaN	0.654806	NaN	0.165617
AT4G15730	Q8GY51		At4g15730 (CW-type Zinc Finger)	NaN	NaN	NaN	NaN	NaN	NaN	NaN	NaN	2	2	2	3.3	3.3	3.3	116.7	3.2549	3456200	683430	2772800	NaN	NaN	NaN	NaN	NaN	NaN	NaN	NaN	NaN	NaN	NaN	NaN	NaN	NaN	NaN	NaN	2.40434	NaN	NaN	NaN
AT2G40600	Q8H114	At2g40600	Appr-1-p processing enzyme family protein	NaN	NaN	NaN	NaN	NaN	NaN	NaN	NaN	2	2	2	20.2	20.2	20.2	27.478	33.559	1947200	1384200	562990	NaN	NaN	NaN	NaN	NaN	NaN	NaN	NaN	NaN	NaN	NaN	NaN	NaN	NaN	NaN	NaN	NaN	NaN	NaN	-1.032
AT1G60970;AT3G09800;AT4G08520	Q8H1F4;Q84LG4-2;Q940S5;Q84LG4		Coatomer subunit zeta-1 (Zeta-1-coat protein) (Zeta-COP 1);Coatomer subunit zeta-2 (Zeta-2-coat protein) (Zeta-COP 2);Coatomer subunit zeta-3 (Zeta-3-coat protein) (Zeta-COP 3)	NaN	NaN	NaN	NaN	NaN	NaN	NaN	NaN	2	2	2	19.3	19.3	19.3	19.876	68.053	1005600	845220	160390	NaN	NaN	NaN	NaN	NaN	NaN	NaN	NaN	NaN	NaN	NaN	NaN	NaN	NaN	NaN	NaN	NaN	NaN	NaN	NaN
AT4G35760	Q8L540	LTO1	Thiol-disulfide oxidoreductase LTO1 (EC 1.1.4.-) (Protein LUMEN THIOL OXIDOREDUCTASE 1) (Vitamin K reductase)	NaN	NaN	NaN	NaN	NaN	NaN	NaN	NaN	2	2	2	6.9	6.9	6.9	40.401	3.3784	1144500	770140	374390	NaN	NaN	NaN	NaN	NaN	NaN	NaN	NaN	NaN	NaN	NaN	NaN	NaN	NaN	NaN	NaN	NaN	NaN	-0.13322	NaN
AT5G42970	Q8L5U0	CSN4	COP9 signalosome complex subunit 4 (AtS4) (Signalosome subunit 4) (Constitutive photomorphogenesis protein 8) (Protein FUSCA 4)	NaN	NaN	NaN	NaN	NaN	NaN	NaN	NaN	2	2	2	12.1	12.1	12.1	44.957	2.5899	516140	354070	162070	NaN	NaN	NaN	NaN	NaN	NaN	NaN	NaN	NaN	NaN	NaN	NaN	NaN	NaN	NaN	NaN	NaN	NaN	-0.262788	NaN
AT5G42310	Q8L844		Pentatricopeptide repeat-containing protein At5g42310, chloroplastic (Protein CRP1 homolog) (AtCRP1)	NaN	NaN	NaN	NaN	NaN	NaN	NaN	NaN	2	2	2	3.9	3.9	3.9	80.002	3.0561	15974000	524700	15449000	NaN	NaN	NaN	NaN	4.91396	NaN	NaN	NaN	NaN	NaN	NaN	NaN	NaN	NaN	NaN	NaN	NaN	NaN	NaN	NaN
AT4G26780	Q8LB47	AR192	GrpE protein homolog 2, mitochondrial	NaN	NaN	NaN	NaN	NaN	NaN	NaN	NaN	2	2	2	9.5	9.5	9.5	36.116	3.288	3359900	1781100	1578700	NaN	NaN	NaN	NaN	NaN	NaN	NaN	NaN	NaN	NaN	0.139369	NaN	NaN	NaN	NaN	NaN	0.161582	0.123919	NaN	NaN
AT1G75680	Q8LCP6		Endoglucanase 10 (EC 3.2.1.4) (Endo-1,4-beta glucanase 10)	NaN	NaN	NaN	NaN	NaN	NaN	NaN	NaN	2	2	2	6.9	6.9	6.9	57.868	3.3621	929090	522520	406560	NaN	NaN	NaN	NaN	NaN	NaN	NaN	NaN	NaN	NaN	NaN	NaN	NaN	NaN	NaN	-0.0558212	NaN	NaN	NaN	NaN
AT4G38100	Q8LDD3	CURT1D	Protein CURVATURE THYLAKOID 1D, chloroplastic	NaN	NaN	NaN	NaN	NaN	NaN	NaN	NaN	2	2	2	17.1	17.1	17.1	21.355	23.008	2355300	1139500	1215800	NaN	NaN	NaN	NaN	NaN	NaN	NaN	NaN	NaN	NaN	NaN	NaN	NaN	NaN	NaN	NaN	NaN	NaN	NaN	-0.0391063
AT3G09810	Q8LG77	IDH6	Isocitrate dehydrogenase [NAD] catalytic subunit 6, mitochondrial (EC 1.1.1.41) (IDH-VI) (Isocitric dehydrogenase 6) (NAD(+)-specific ICDH 6)	NaN	NaN	NaN	NaN	NaN	NaN	NaN	NaN	2	1	1	5.9	4	4	40.575	2.9325	934920	528700	406210	NaN	NaN	NaN	NaN	NaN	NaN	NaN	NaN	NaN	NaN	NaN	NaN	NaN	NaN	NaN	NaN	NaN	NaN	0.189542	NaN
AT5G64350	Q8LGG0	FKBP12	Peptidyl-prolyl cis-trans isomerase FKBP12 (PPIase FKBP12) (EC 5.2.1.8) (12 kDa FK506-binding protein) (12 kDa FKBP) (FK506-binding protein 12) (AtFKBP12) (FKBP-12) (Immunophilin FKBP12) (Rotamase)	NaN	NaN	NaN	NaN	NaN	NaN	NaN	NaN	2	2	2	23.2	23.2	23.2	11.987	9.0364	6392900	3862500	2530400	NaN	NaN	NaN	NaN	NaN	NaN	NaN	NaN	-0.683634	NaN	NaN	NaN	NaN	-0.559712	NaN	NaN	NaN	NaN	0.121795	NaN
AT5G27540	Q8RXF8	MIRO1	Mitochondrial Rho GTPase 1 (AtMIRO1) (EC 3.6.5.-) (Miro-related GTPase 1)	NaN	NaN	NaN	NaN	NaN	NaN	NaN	NaN	2	2	2	4.3	4.3	4.3	72.322	17.97	1003400	582010	421370	NaN	NaN	NaN	NaN	NaN	NaN	NaN	NaN	NaN	NaN	NaN	NaN	NaN	NaN	NaN	NaN	NaN	NaN	NaN	NaN
AT2G33255	Q8RYE9-2;Q8RYE9		Haloacid dehalogenase-like hydrolase domain-containing protein At2g33255 (EC 3.1.3.-)	NaN	NaN	NaN	NaN	NaN	NaN	NaN	NaN	2	2	2	10.7	10.7	10.7	25.141	9.0729	4311500	2622300	1689200	NaN	NaN	NaN	NaN	NaN	NaN	NaN	NaN	NaN	NaN	NaN	NaN	NaN	0.0348278	NaN	NaN	0.169372	NaN	NaN	-0.0665427
AT2G27450	Q8VYF5-2;Q8VYF5	CPA	N-carbamoylputrescine amidase (EC 3.5.1.53) (Nitrilase-like protein 1)	NaN	NaN	NaN	NaN	NaN	NaN	NaN	NaN	2	2	2	16.1	16.1	16.1	33.533	7.6759	1594900	993600	601320	NaN	NaN	NaN	NaN	NaN	NaN	NaN	NaN	NaN	NaN	NaN	NaN	NaN	-0.274632	NaN	NaN	NaN	NaN	NaN	NaN
AT5G16210	Q8VYW7	At5g16210	AT5g16210/T21H19_130 (HEAT repeat-containing protein)	NaN	NaN	NaN	NaN	NaN	NaN	NaN	NaN	2	2	2	1.9	1.9	1.9	132.31	2.5955	1371100	599970	771160	NaN	NaN	NaN	NaN	NaN	NaN	NaN	NaN	NaN	NaN	NaN	NaN	NaN	NaN	NaN	NaN	NaN	NaN	NaN	NaN
AT5G46790	Q8VZS8	PYL1	Abscisic acid receptor PYL1 (ABI1-binding protein 6) (PYR1-like protein 1) (Regulatory components of ABA receptor 9)	NaN	NaN	NaN	NaN	NaN	NaN	NaN	NaN	2	2	2	14.5	14.5	14.5	25.361	4.0052	0	0	0	NaN	NaN	NaN	NaN	NaN	NaN	NaN	NaN	NaN	NaN	NaN	NaN	NaN	NaN	NaN	NaN	NaN	NaN	NaN	NaN
AT4G25650	Q8W496-2;Q8W496	PTC52	Protochlorophyllide-dependent translocon component 52, chloroplastic (ACD1-like protein) (Protein TIC 55-IV) (Translocon at the inner envelope membrane of chloroplasts 55-IV)	NaN	NaN	NaN	NaN	NaN	NaN	NaN	NaN	2	2	2	5.6	5.6	5.6	61.263	3.2443	728620	328860	399760	NaN	NaN	NaN	NaN	NaN	NaN	NaN	NaN	NaN	NaN	NaN	NaN	NaN	NaN	NaN	NaN	NaN	NaN	NaN	NaN
AT1G07080	Q93VQ6	At1g07080	At1g07080/F10K1_15 (Thioredoxin superfamily protein)	NaN	NaN	NaN	NaN	NaN	NaN	NaN	NaN	2	2	2	17.4	17.4	17.4	29.698	6.709	789810	438530	351280	NaN	NaN	NaN	NaN	NaN	NaN	NaN	NaN	NaN	NaN	NaN	NaN	NaN	-0.056819	NaN	NaN	NaN	NaN	NaN	NaN
AT4G39660	Q940M2	AGT2	Alanine--glyoxylate aminotransferase 2 homolog 1, mitochondrial (EC 2.6.1.44) (Beta-alanine-pyruvate aminotransferase 1)	NaN	NaN	NaN	NaN	NaN	NaN	NaN	NaN	2	2	2	7.6	7.6	7.6	51.952	7.081	1166100	696420	469630	NaN	NaN	NaN	NaN	NaN	NaN	NaN	NaN	NaN	NaN	-0.290706	NaN	NaN	NaN	NaN	NaN	NaN	NaN	NaN	NaN
AT3G57890	Q940S9;F4J4K6	At3g57890	AT3g57890/T10K17_100 (Tubulin binding cofactor C domain-containing protein);Tubulin binding cofactor C domain-containing protein	NaN	NaN	NaN	NaN	NaN	NaN	NaN	NaN	2	2	2	7.2	7.2	7.2	62.778	11.217	2409500	1483300	926140	NaN	NaN	NaN	NaN	NaN	NaN	NaN	NaN	NaN	NaN	NaN	-0.183793	NaN	NaN	NaN	NaN	0.115183	NaN	0.134612	NaN
AT5G05170	Q941L0	CESA3	Cellulose synthase A catalytic subunit 3 [UDP-forming] (AtCesA3) (EC 2.4.1.12) (Constitutive expression of VSP1 protein 1) (Isoxaben-resistant protein 1) (Ath-B) (Protein ECTOPIC LIGNIN 1) (Protein RADIALLY SWOLLEN 5) (AtRSW5)	NaN	NaN	NaN	NaN	NaN	NaN	NaN	NaN	2	2	2	3.6	3.6	3.6	119.68	3.3307	6555900	3669400	2886500	NaN	NaN	NaN	NaN	NaN	NaN	NaN	NaN	NaN	NaN	NaN	NaN	NaN	NaN	NaN	NaN	NaN	NaN	NaN	NaN
AT4G35230	Q944A7		Serine/threonine-protein kinase BSK1 (EC 2.7.11.1) (Brassinosteroid-signaling kinase 1)	NaN	NaN	NaN	NaN	NaN	NaN	NaN	NaN	2	2	2	7.8	7.8	7.8	56.817	8.4148	756950	467190	289750	NaN	NaN	NaN	NaN	NaN	NaN	NaN	NaN	NaN	NaN	NaN	NaN	NaN	NaN	NaN	NaN	NaN	NaN	-0.272437	NaN
AT4G26555	Q944B0	FKBP16-1	Peptidyl-prolyl cis-trans isomerase FKBP16-1, chloroplastic (PPIase FKBP16-1) (EC 5.2.1.8) (FK506-binding protein 16-1) (AtFKBP16-1) (Immunophilin FKBP16-1) (Rotamase)	NaN	NaN	NaN	NaN	NaN	NaN	NaN	NaN	2	2	2	12.1	12.1	12.1	22.693	5.1653	6140200	2766600	3373600	NaN	NaN	NaN	NaN	NaN	NaN	0.197137	NaN	NaN	NaN	0.509551	NaN	NaN	1.06345	NaN	NaN	0.677901	NaN	1.66328	NaN
AT3G17170	Q948R9	RFC3	AT3g17170/K14A17_29 (RPS6-like protein) (Translation elongation factor EF1B/ribosomal protein S6 family protein)	NaN	NaN	NaN	NaN	NaN	NaN	NaN	NaN	2	2	2	9.2	9.2	9.2	36.275	2.9011	1982900	841120	1141700	NaN	NaN	NaN	NaN	NaN	NaN	NaN	NaN	NaN	NaN	NaN	NaN	NaN	NaN	NaN	NaN	NaN	NaN	NaN	NaN
AT4G30810	Q949Q7	SCPL29	Serine carboxypeptidase-like 29 (EC 3.4.16.-)	NaN	NaN	NaN	NaN	NaN	NaN	NaN	NaN	2	2	2	8.6	8.6	8.6	53.055	7.1081	522180	181860	340320	NaN	NaN	NaN	NaN	NaN	NaN	NaN	NaN	NaN	NaN	NaN	NaN	NaN	NaN	NaN	NaN	NaN	NaN	NaN	NaN
AT4G39460	Q94AG6	SAMC1	S-adenosylmethionine carrier 1, chloroplastic/mitochondrial (S-adenosylmethionine transporter 1) (AtSAMT1)	NaN	NaN	NaN	NaN	NaN	NaN	NaN	NaN	2	2	2	13.2	13.2	13.2	34.861	10.226	1429600	782050	647580	NaN	NaN	NaN	NaN	NaN	NaN	NaN	NaN	NaN	0.326102	NaN	NaN	NaN	NaN	NaN	NaN	NaN	NaN	NaN	NaN
AT4G04330	Q94AU9	At4g04330	Chaperonin-like RBCX protein 1, chloroplastic (AtRBCX1)	NaN	NaN	NaN	NaN	NaN	NaN	NaN	NaN	2	2	2	19	19	19	20.199	5.227	852230	422890	429340	NaN	NaN	0.759487	NaN	NaN	NaN	NaN	NaN	NaN	NaN	NaN	NaN	NaN	NaN	NaN	NaN	NaN	NaN	NaN	NaN
AT3G52155	Q94BY1	At3g52155	Uncharacterized protein At3g52155, chloroplastic (EC 3.1.3.-)	NaN	NaN	NaN	NaN	NaN	NaN	NaN	NaN	2	2	2	16.1	16.1	16.1	23.588	3.1623	334220	267280	66936	NaN	NaN	NaN	NaN	NaN	NaN	NaN	NaN	NaN	NaN	NaN	NaN	NaN	NaN	NaN	NaN	NaN	NaN	NaN	NaN
AT5G04130	Q94BZ7-2;Q94BZ7	GYRBM	DNA gyrase subunit B, mitochondrial (EC 5.99.1.3)	NaN	NaN	NaN	NaN	NaN	NaN	NaN	NaN	2	2	2	4	4	4	56.873	2.8931	8545300	4757600	3787700	NaN	NaN	NaN	NaN	NaN	NaN	NaN	NaN	NaN	NaN	NaN	NaN	NaN	NaN	NaN	NaN	NaN	NaN	0.341972	NaN
AT5G27670	Q94F49		Probable histone H2A.5 (HTA7)	NaN	NaN	NaN	NaN	NaN	NaN	NaN	NaN	2	1	1	14	8	8	15.908	16.194	1684500	1040600	643900	NaN	NaN	NaN	NaN	NaN	NaN	NaN	NaN	NaN	NaN	NaN	NaN	NaN	-0.0950819	-0.546695	NaN	NaN	NaN	NaN	NaN
AT4G32770	Q94FY7	VTE1	Tocopherol cyclase, chloroplastic (EC 5.5.1.24) (Sucrose export defective 1) (Vitamin E pathway gene 1 protein)	NaN	NaN	NaN	NaN	NaN	NaN	NaN	NaN	2	2	2	5.7	5.7	5.7	54.72	3.4374	2909900	1676300	1233600	NaN	NaN	NaN	NaN	-0.613803	NaN	NaN	NaN	NaN	NaN	NaN	NaN	NaN	0.0998125	NaN	NaN	NaN	NaN	NaN	NaN
AT4G03560	Q94KI8	TPC1	Two pore calcium channel protein 1 (Calcium channel protein 1) (AtCCH1) (Fatty acid oxygenation up-regulated protein 2) (Voltage-dependent calcium channel protein TPC1) (AtTPC1)	NaN	NaN	NaN	NaN	NaN	NaN	NaN	NaN	2	2	2	4.1	4.1	4.1	84.872	5.1753	1749600	1019600	729990	NaN	NaN	NaN	NaN	NaN	NaN	NaN	NaN	NaN	NaN	NaN	NaN	NaN	NaN	NaN	NaN	NaN	NaN	NaN	NaN
AT1G64260	Q9C7V1	F15H21.15	MuDR family transposase	NaN	NaN	NaN	NaN	NaN	NaN	NaN	NaN	2	2	2	4.7	4.7	4.7	83.214	2.5926	12560000	7986000	4574200	NaN	NaN	NaN	NaN	NaN	NaN	NaN	NaN	NaN	NaN	NaN	NaN	NaN	NaN	NaN	NaN	NaN	NaN	NaN	NaN
AT1G66130	Q9C8D3	F15E12.2	NAD(P)-binding Rossmann-fold superfamily protein (Oxidoreductase, putative)	NaN	NaN	NaN	NaN	NaN	NaN	NaN	NaN	2	2	2	8.2	8.2	8.2	40.097	2.6152	201820	95086	106740	NaN	NaN	NaN	NaN	NaN	NaN	NaN	NaN	NaN	NaN	NaN	NaN	NaN	NaN	NaN	NaN	NaN	NaN	NaN	NaN
AT1G51730	Q9C8I1	F19C24.6	Ubiquitin-conjugating enzyme family protein	NaN	NaN	NaN	NaN	NaN	NaN	NaN	NaN	2	2	2	11.9	11.9	11.9	28.705	4.7005	1389400	898710	490690	NaN	NaN	NaN	NaN	NaN	NaN	NaN	NaN	NaN	NaN	NaN	NaN	NaN	NaN	NaN	NaN	-0.142859	NaN	NaN	NaN
AT1G74230	Q9C909	RBG5	Glycine-rich RNA-binding protein 5, mitochondrial (AtGR-RBP5) (AtRBG5) (Mitochondrial RNA-binding protein 2b) (At-mRBP2b) (Organelle RRM domain-containing protein 4)	NaN	NaN	NaN	NaN	NaN	NaN	NaN	NaN	2	2	2	14.9	14.9	14.9	28.728	3.2993	1965100	1083900	881180	NaN	NaN	NaN	NaN	NaN	NaN	NaN	NaN	NaN	NaN	NaN	NaN	NaN	NaN	NaN	NaN	NaN	-0.0468026	NaN	0.370111
AT1G64650;AT3G49310;AT4G27720	Q9CA11;A8MR14;Q9C5R0;Q6NLR2	T1G12.1;At1g64650;T29A15.210	8780-5873);At1g64650 (Major facilitator superfamily protein);At3g49310 (Major facilitator superfamily protein) (Putative transporter;AT4g27720/T29A15_210 (Major facilitator superfamily protein) (Putative transporter);Major facilitator superfamily protein	NaN	NaN	NaN	NaN	NaN	NaN	NaN	NaN	2	2	2	5.7	5.7	5.7	50.879	3.0432	2458200	1534400	923830	NaN	NaN	NaN	NaN	NaN	NaN	NaN	NaN	NaN	NaN	NaN	NaN	NaN	NaN	NaN	NaN	NaN	NaN	NaN	NaN
AT1G77710	Q9CA23		Ubiquitin-fold modifier 1	NaN	NaN	NaN	NaN	NaN	NaN	NaN	NaN	2	2	2	46.2	46.2	46.2	9.9284	13.339	1533300	972860	560440	NaN	NaN	NaN	NaN	NaN	NaN	NaN	NaN	NaN	NaN	NaN	NaN	NaN	NaN	NaN	NaN	NaN	NaN	NaN	NaN
AT1G69840	Q9CAR7	HIR2	Hypersensitive-induced response protein 2 (AtHIR2)	NaN	NaN	NaN	NaN	NaN	NaN	NaN	NaN	2	2	2	9.8	9.8	9.8	31.405	5.3106	413590	278700	134890	-0.401202	NaN	NaN	NaN	NaN	NaN	NaN	NaN	NaN	NaN	NaN	NaN	NaN	NaN	NaN	NaN	NaN	NaN	NaN	NaN
AT1G54290;AT4G27130;AT5G54760	Q9FFV1;Q94JV4;P41568	At5g54760	At5g54760 (Protein translation factor Sui1 homolog) (Translation initiation factor SUI1 family protein);Protein translation factor SUI1 homolog 1;Protein translation factor SUI1 homolog 2	NaN	NaN	NaN	NaN	NaN	NaN	NaN	NaN	2	2	1	35.4	35.4	11.5	12.62	13.556	2326100	953440	1372700	NaN	NaN	NaN	NaN	NaN	NaN	NaN	NaN	NaN	NaN	NaN	NaN	NaN	NaN	NaN	-1.32534	NaN	NaN	NaN	NaN
AT5G42240	Q9FH05	SCPL42	Serine carboxypeptidase-like 42 (EC 3.4.16.-)	NaN	NaN	NaN	NaN	NaN	NaN	NaN	NaN	2	2	2	6.3	6.3	6.3	52.874	3.6151	867340	429860	437490	NaN	NaN	NaN	NaN	NaN	NaN	NaN	NaN	NaN	NaN	NaN	NaN	NaN	NaN	NaN	NaN	NaN	NaN	0.489817	NaN
AT5G42150	Q9FHX0	At5g42150	Glutathione S-transferase family protein (Similarity to glutathione-S-transferase/glutaredoxin)	NaN	NaN	NaN	NaN	NaN	NaN	NaN	NaN	2	2	2	12.4	12.4	12.4	35.549	3.9093	1391900	847860	544040	NaN	NaN	NaN	NaN	NaN	NaN	NaN	NaN	NaN	NaN	NaN	NaN	NaN	NaN	NaN	NaN	NaN	NaN	0.506497	NaN
AT5G47870	Q9FIJ4	At5g47870	DNA repair RAD52-like protein 2, chloroplastic (Organellar DNA-binding protein 2)	NaN	NaN	NaN	NaN	NaN	NaN	NaN	NaN	2	2	2	20.1	20.1	20.1	21.409	4.8291	1575300	995420	579830	NaN	NaN	NaN	NaN	NaN	NaN	NaN	NaN	NaN	NaN	NaN	NaN	NaN	NaN	NaN	NaN	NaN	NaN	NaN	NaN
AT4G17890;AT5G46750	Q9FIQ0;Q8H100-2;Q8H100	AGD9;AGD8	Probable ADP-ribosylation factor GTPase-activating protein AGD8 (ARF GAP AGD8) (Protein ARF-GAP DOMAIN 8) (AtAGD8);Probable ADP-ribosylation factor GTPase-activating protein AGD9 (ARF GAP AGD9) (Protein ARF-GAP DOMAIN 9) (AtAGD9)	NaN	NaN	NaN	NaN	NaN	NaN	NaN	NaN	2	2	2	5.5	5.5	5.5	43.55	7.0123	979850	531540	448320	NaN	NaN	NaN	NaN	NaN	NaN	NaN	NaN	NaN	NaN	NaN	NaN	NaN	NaN	NaN	NaN	0.175012	NaN	NaN	NaN
AT5G59870	Q9FJE8		Probable histone H2A.7 (HTA6)	NaN	NaN	NaN	NaN	NaN	NaN	NaN	NaN	2	1	1	21.3	15.3	15.3	15.966	3.6086	1699200	1135900	563300	NaN	NaN	NaN	NaN	NaN	NaN	NaN	NaN	NaN	NaN	NaN	NaN	NaN	NaN	NaN	NaN	NaN	NaN	NaN	NaN
AT5G48870	Q9FKB0	LSM5	Sm-like protein LSM5 (AtLSM5) (Protein SUPERSENSITIVE TO ABA AND DROUGHT 1) (AtSAD1) (U6 snRNA-associated Sm-like protein LSM5)	NaN	NaN	NaN	NaN	NaN	NaN	NaN	NaN	2	2	2	44.3	44.3	44.3	9.658	3.9822	813090	491170	321920	NaN	NaN	NaN	NaN	NaN	NaN	NaN	NaN	NaN	NaN	NaN	NaN	NaN	NaN	-0.355584	NaN	NaN	NaN	NaN	NaN
AT5G23040	Q9FN50	CPP1	Protein CHAPERONE-LIKE PROTEIN OF POR1, chloroplastic (AtCPP1) (Protein CELL GROWTH DEFECT FACTOR 1) (AtCDF1)	NaN	NaN	NaN	NaN	NaN	NaN	NaN	NaN	2	2	2	10.5	10.5	10.5	28.815	4.5556	5555600	3355700	2199900	NaN	NaN	NaN	NaN	NaN	NaN	NaN	NaN	NaN	NaN	NaN	NaN	NaN	NaN	NaN	1.58372	NaN	-0.112146	NaN	NaN
AT3G60190	Q9FNX5	DRP1E	Dynamin-related protein 1E (Dynamin-like protein 4) (Dynamin-like protein DLP2) (Dynamin-like protein E)	NaN	NaN	NaN	NaN	NaN	NaN	NaN	NaN	2	1	1	3	1.9	1.9	69.803	7.2198	0	0	0	NaN	NaN	NaN	NaN	NaN	NaN	NaN	NaN	NaN	NaN	NaN	NaN	NaN	NaN	NaN	NaN	NaN	NaN	NaN	NaN
AT1G33560;AT5G04720;AT5G47280	Q9FW44;Q9LVT1;Q9LZ25	ADR1	Disease resistance protein ADR1 (Activated disease resistance protein 1);Probable disease resistance protein At5g04720;Putative disease resistance protein At5g47280	NaN	NaN	NaN	NaN	NaN	NaN	NaN	NaN	2	2	2	2.2	2.2	2.2	90.128	2.6199	11688000	6153600	5534100	NaN	NaN	NaN	NaN	NaN	NaN	NaN	NaN	NaN	NaN	NaN	NaN	NaN	NaN	NaN	NaN	NaN	NaN	NaN	-0.119379
AT1G19740;AT1G75460	Q9FWT4;Q9FXH3	F1B16.1;F6F9.20	ATP-dependent protease La (LON) domain protein (F1B16.1 protein) (Protease, putative) (Putative protease);ATP-dependent protease La (LON) domain protein (F6F9.20 protein)	NaN	NaN	NaN	NaN	NaN	NaN	NaN	NaN	2	2	2	9.7	9.7	9.7	31.335	4.3633	4273600	2724200	1549400	NaN	NaN	NaN	NaN	NaN	NaN	NaN	NaN	NaN	NaN	NaN	NaN	NaN	-1.92129	NaN	NaN	0.161156	NaN	NaN	NaN
AT1G49640;AT1G49650;AT1G49660	Q9FX94;Q9FX92;Q9FX93	CXE5;CXE3;CXE4	Probable carboxylesterase 4, mitochondrial (AtCXE4) (EC 3.1.1.1);Probable carboxylesterase 3 (AtCXE3) (EC 3.1.1.1);Probable carboxylesterase 5 (AtCXE5) (EC 3.1.1.1)	NaN	NaN	NaN	NaN	NaN	NaN	NaN	NaN	2	2	2	8.8	8.8	8.8	35.196	5.0461	1738000	1022700	715260	NaN	NaN	NaN	NaN	NaN	NaN	NaN	NaN	NaN	NaN	0.0646802	NaN	NaN	NaN	NaN	NaN	NaN	NaN	NaN	NaN
AT5G62810	Q9FXT6	PEX14	Peroxisomal membrane protein PEX14 (Peroxin-14) (AtPEX14) (Peroxisome biogenesis protein 14) (Pex14p) (Protein PEROXISOME DEFECTIVE 2)	NaN	NaN	NaN	NaN	NaN	NaN	NaN	NaN	2	2	2	5.3	5.3	5.3	55.594	3.0291	1069100	499190	569950	NaN	NaN	NaN	NaN	NaN	NaN	NaN	NaN	NaN	NaN	NaN	NaN	NaN	NaN	NaN	NaN	NaN	NaN	NaN	NaN
AT5G17050	Q9LFJ8	UGT78D2	UDP-glycosyltransferase 78D2 (EC 2.4.1.-) (Anthocyanin 3-O-glucosyltransferase) (Flavonol 3-O-glucosyltransferase) (EC 2.4.1.91) (UDP glucose:flavonoid 3-O-glucosyltransferase)	NaN	NaN	NaN	NaN	NaN	NaN	NaN	NaN	2	2	1	5.7	5.7	2.2	50.485	3.8593	11413000	9795200	1618200	NaN	NaN	NaN	NaN	0.531763	NaN	0.448948	NaN	NaN	NaN	NaN	NaN	NaN	NaN	NaN	NaN	NaN	NaN	-1.74657	-1.95728
AT3G12345	Q9LHH3	At3g12345	FKBP-type peptidyl-prolyl cis-trans isomerase (FKBP-type peptidyl-prolyl cis-trans isomerase, putative) (Stress-enhanced protein 4)	NaN	NaN	NaN	NaN	NaN	NaN	NaN	NaN	2	2	2	12.4	12.4	12.4	20.149	4.729	11690000	6438300	5251700	NaN	NaN	NaN	NaN	NaN	NaN	NaN	NaN	NaN	NaN	NaN	NaN	NaN	0.600801	NaN	NaN	NaN	NaN	0.0768141	0.119769
AT3G27820	Q9LK94		Monodehydroascorbate reductase 4, peroxisomal (AtMDAR4) (EC 1.6.5.4)	NaN	NaN	NaN	NaN	NaN	NaN	NaN	NaN	2	2	2	4.9	4.9	4.9	53.526	2.8779	13455000	7738100	5717200	NaN	NaN	0.70756	NaN	NaN	NaN	NaN	NaN	NaN	NaN	NaN	NaN	NaN	0.500175	NaN	NaN	NaN	NaN	NaN	NaN
AT5G13710	Q9LM02	SMT1	Cycloartenol-C-24-methyltransferase (EC 2.1.1.41) (24-sterol C-methyltransferase 1) (Sterol C-methyltransferase 1) (Protein CEPHALOPOD) (Protein STEROL METHYLTRANSFERASE 1)	NaN	NaN	NaN	NaN	NaN	NaN	NaN	NaN	2	2	2	8.6	8.6	8.6	38.268	4.5411	3700600	2428800	1271800	NaN	NaN	NaN	NaN	NaN	NaN	NaN	NaN	NaN	NaN	-0.39747	NaN	NaN	NaN	NaN	NaN	NaN	NaN	NaN	0.348053
AT1G01960	Q9LPC5	BIG3	Brefeldin A-inhibited guanine nucleotide-exchange protein 3 (BIG3) (ARF guanine-nucleotide exchange factor BIG3) (Protein EMBRYO SAC DEVELOPMENT ARREST 10)	NaN	NaN	NaN	NaN	NaN	NaN	NaN	NaN	2	2	2	1.7	1.7	1.7	194.94	3.4401	14724000	7776000	6948400	NaN	NaN	NaN	NaN	NaN	NaN	NaN	NaN	NaN	NaN	NaN	NaN	NaN	NaN	NaN	0.320899	NaN	NaN	NaN	NaN
AT5G46580	Q9LS25		Pentatricopeptide repeat-containing protein At5g46580, chloroplastic	NaN	NaN	NaN	NaN	NaN	NaN	NaN	NaN	2	2	2	3.7	3.7	3.7	80.879	3.0048	1478800	736680	742080	NaN	NaN	NaN	NaN	NaN	NaN	NaN	NaN	NaN	NaN	NaN	NaN	NaN	NaN	NaN	NaN	NaN	NaN	NaN	0.453468
[truncated: 1,302 more rows]

## Sheet: Suppl Table 2
Supplementary Table 2: GO terms and KEGG pathways enriched in proteins with significant increase in three or four out of MY, MM, EY and EM (FDR = 0.05).
[truncated: 20 more rows]

[truncated: 7 more sheets: Suppl Table 3, Suppl Table 4, Suppl Table 5, Suppl Table 6, Suppl Table 7, Suppl Table 8, Suppl Table 9]
